# Supplementary material
Source: publisher figshare collection journal article supplement (https://acs.figshare.com/ndownloader/files/3745660)
Supplement: Supplementary file 1 [file 3745660]

 
data_erj22 
  
_audit_creation_method            'SHELXL-2014/7' 
_shelx_SHELXL_version_number      '2014/7' 
_chemical_name_systematic         ? 
_chemical_name_common             ? 
_chemical_melting_point           ? 
_chemical_formula_moiety          ? 
_chemical_formula_sum 
 'C15 H17 N O4 S' 
_chemical_formula_weight          307.35 
  
loop_ 
 _atom_type_symbol 
 _atom_type_description 
 _atom_type_scat_dispersion_real 
 _atom_type_scat_dispersion_imag 
 _atom_type_scat_source 
 'C'  'C'   0.0033   0.0016 
 'International Tables Vol C Tables 4.2.6.8 and 6.1.1.4' 
 'H'  'H'   0.0000   0.0000 
 'International Tables Vol C Tables 4.2.6.8 and 6.1.1.4' 
 'N'  'N'   0.0061   0.0033 
 'International Tables Vol C Tables 4.2.6.8 and 6.1.1.4' 
 'O'  'O'   0.0106   0.0060 
 'International Tables Vol C Tables 4.2.6.8 and 6.1.1.4' 
 'S'  'S'   0.1246   0.1234 
 'International Tables Vol C Tables 4.2.6.8 and 6.1.1.4' 
  
_space_group_crystal_system       orthorhombic 
_space_group_IT_number            19 
_space_group_name_H-M_alt         'P 21 21 21' 
_space_group_name_Hall            'P 2ac 2ab' 
  
_shelx_space_group_comment 
; 
The symmetry employed for this shelxl refinement is uniquely defined 
by the following loop, which should always be used as a source of 
symmetry information in preference to the above space-group names. 
They are only intended as comments. 
; 
  
loop_ 
 _space_group_symop_operation_xyz 
 'x, y, z' 
 '-x+1/2, -y, z+1/2' 
 '-x, y+1/2, -z+1/2' 
 'x+1/2, -y+1/2, -z' 
  
_cell_length_a                    7.7171(5) 
_cell_length_b                    7.9486(5) 
_cell_length_c                    23.8160(14) 
_cell_angle_alpha                 90 
_cell_angle_beta                  90 
_cell_angle_gamma                 90 
_cell_volume                      1460.88(16) 
_cell_formula_units_Z             4 
_cell_measurement_temperature     133(2) 
_cell_measurement_reflns_used     8847 
_cell_measurement_theta_min       2.70 
_cell_measurement_theta_max       28.26 
  
_exptl_crystal_description        block 
_exptl_crystal_colour             colorless 
_exptl_crystal_density_meas       not_measured 
_exptl_crystal_density_method     not_measured 
_exptl_crystal_density_diffrn     1.397 
_exptl_crystal_F_000              648 
_exptl_transmission_factor_min    ? 
_exptl_transmission_factor_max    ? 
_exptl_crystal_size_max           0.288 
_exptl_crystal_size_mid           0.160 
_exptl_crystal_size_min           0.108 
_exptl_absorpt_coefficient_mu     0.237 
_shelx_estimated_absorpt_T_min    0.935 
_shelx_estimated_absorpt_T_max    0.975 
_exptl_absorpt_correction_type    numerical 
_exptl_absorpt_correction_T_min   0.9400 
_exptl_absorpt_correction_T_max   0.9980 
_exptl_absorpt_process_details    'Bruker SADABS 2014/5' 
_exptl_absorpt_special_details    ? 
_diffrn_ambient_temperature       133(2) 
_diffrn_radiation_wavelength      0.71073 
_diffrn_radiation_type            MoK\a 
_diffrn_source                    'fine-focus sealed tube' 
_diffrn_measurement_device_type   'Bruker SMART APEX II CCD' 
_diffrn_measurement_method        '\f and \w scans' 
_diffrn_detector_area_resol_mean  ? 
_diffrn_reflns_number             17581 
_diffrn_reflns_av_unetI/netI      0.0254 
_diffrn_reflns_av_R_equivalents   0.0306 
_diffrn_reflns_limit_h_min        -10 
_diffrn_reflns_limit_h_max        10 
_diffrn_reflns_limit_k_min        -10 
_diffrn_reflns_limit_k_max        10 
_diffrn_reflns_limit_l_min        -31 
_diffrn_reflns_limit_l_max        31 
_diffrn_reflns_theta_min          1.710 
_diffrn_reflns_theta_max          28.288 
_diffrn_reflns_theta_full         25.500 
_diffrn_measured_fraction_theta_max   0.992 
_diffrn_measured_fraction_theta_full  1.000 
_diffrn_reflns_Laue_measured_fraction_max    0.992 
_diffrn_reflns_Laue_measured_fraction_full   1.000 
_diffrn_reflns_point_group_measured_fraction_max   0.977 
_diffrn_reflns_point_group_measured_fraction_full  1.000 
_reflns_number_total              3562 
_reflns_number_gt                 3283 
_reflns_threshold_expression      'I > 2\s(I)' 
_reflns_Friedel_coverage          0.699 
_reflns_Friedel_fraction_max      0.957 
_reflns_Friedel_fraction_full     1.000 
  
_reflns_special_details 
; 
 Reflections were merged by SHELXL according to the crystal 
 class for the calculation of statistics and refinement. 
  
 _reflns_Friedel_fraction is defined as the number of unique 
 Friedel pairs measured divided by the number that would be 
 possible theoretically, ignoring centric projections and 
 systematic absences. 
; 
  
_computing_data_collection        'Bruker APEX2 2014.11-0, 2014' 
_computing_cell_refinement        'Bruker SAINT 8.34a, 2013' 
_computing_data_reduction         'Bruker SAINT 8.34a, 2013' 
_computing_structure_solution     'Bruker SHELXTL 2013/1' 
_computing_structure_refinement 'SHELXL-2014/7 (Sheldrick, 2014)' 
_computing_molecular_graphics     'Bruker SHELXTL' 
_computing_publication_material   'Bruker SHELXTL' 
_refine_special_details           
;
A colorless crystal of approximate dimensions 0.288 x 0.160 x 0.108 mm 
was mounted on a glass fiber and transferred to a Bruker SMART APEX II 
diffractometer.  The APEX2 program package was used to determine the 
unit-cell parameters and for data collection (60 sec/frame scan time 
for a sphere of diffraction data).  The raw frame data was processed 
using SAINT and SADABS to yield the reflection data file.  Subsequent 
calculations were carried out using the SHELXTL program.  The 
diffraction symmetry was mmm and the systematic absences were consistent 
with the orthorhombic space group P212121 that was later determined to 
be correct.

The structure was solved by direct methods and refined on F2 by full-matrix 
least-squares techniques.  The analytical scattering factors for neutral 
atoms were used throughout the analysis.  Hydrogen atoms were located from 
a difference-Fourier map and refined (x,y,z and Uiso). 

At convergence, wR2 = 0.0706 and Goof = 1.040 for 258 variables refined 
against 3562 data (0.75 �), R1 = 0.0294 for those 3283 data with I > 2.0sigma(I).  
The absolute structure was assigned by refinement of the Flack parameter.

; 
_refine_ls_structure_factor_coef  Fsqd 
_refine_ls_matrix_type            full 
_refine_ls_weighting_scheme       calc 
_refine_ls_weighting_details 
'w=1/[\s^2^(Fo^2^)+(0.0363P)^2^+0.3490P] where P=(Fo^2^+2Fc^2^)/3' 
_atom_sites_solution_primary      direct 
_atom_sites_solution_secondary    difmap 
_atom_sites_solution_hydrogens    difmap 
_refine_ls_hydrogen_treatment     refall 
_refine_ls_extinction_method      none 
_refine_ls_extinction_coef        ? 
_refine_ls_abs_structure_details 
; 
 Flack x determined using 1301 quotients [(I+)-(I-)]/[(I+)+(I-)] 
 (Parsons, Flack and Wagner, Acta Cryst. B69 (2013) 249-259). 
; 
_refine_ls_abs_structure_Flack    0.07(2) 
_chemical_absolute_configuration  ad 
_refine_ls_number_reflns          3562 
_refine_ls_number_parameters      258 
_refine_ls_number_restraints      0 
_refine_ls_R_factor_all           0.0342 
_refine_ls_R_factor_gt            0.0294 
_refine_ls_wR_factor_ref          0.0706 
_refine_ls_wR_factor_gt           0.0678 
_refine_ls_goodness_of_fit_ref    1.040 
_refine_ls_restrained_S_all       1.040 
_refine_ls_shift/su_max           0.000 
_refine_ls_shift/su_mean          0.000 
  
loop_ 
 _atom_site_label 
 _atom_site_type_symbol 
 _atom_site_fract_x 
 _atom_site_fract_y 
 _atom_site_fract_z 
 _atom_site_U_iso_or_equiv 
 _atom_site_adp_type 
 _atom_site_occupancy 
 _atom_site_site_symmetry_order 
 _atom_site_calc_flag 
 _atom_site_refinement_flags_posn 
 _atom_site_refinement_flags_adp 
 _atom_site_refinement_flags_occupancy 
 _atom_site_disorder_assembly 
 _atom_site_disorder_group 
S1 S 0.96190(6) 0.26051(6) 0.90536(2) 0.01656(12) Uani 1 1 d . . . . . 
N1 N 1.0456(2) 0.3214(2) 0.84561(7) 0.0183(4) Uani 1 1 d . . . . . 
O1 O 1.0861(2) 0.16651(19) 0.93766(6) 0.0251(4) Uani 1 1 d . . . . . 
O2 O 0.7974(2) 0.17922(19) 0.89720(7) 0.0254(4) Uani 1 1 d . . . . . 
O3 O 0.73094(19) 0.5275(2) 0.68299(6) 0.0215(3) Uani 1 1 d . . . . . 
O4 O 0.50646(19) 0.41512(19) 0.73008(6) 0.0203(3) Uani 1 1 d . . . . . 
C1 C 0.9266(2) 0.4647(2) 0.92981(8) 0.0142(4) Uani 1 1 d . . . . . 
C2 C 0.8545(3) 0.5077(3) 0.98100(8) 0.0186(4) Uani 1 1 d . . . . . 
C3 C 0.8250(3) 0.6771(3) 0.99078(9) 0.0218(4) Uani 1 1 d . . . . . 
C4 C 0.8676(3) 0.7967(3) 0.95049(9) 0.0212(4) Uani 1 1 d . . . . . 
C5 C 0.9407(2) 0.7505(2) 0.89956(8) 0.0173(4) Uani 1 1 d . . . . . 
C6 C 0.9706(2) 0.5809(2) 0.88895(7) 0.0130(4) Uani 1 1 d . . . . . 
C7 C 1.0489(3) 0.5054(2) 0.83607(8) 0.0149(4) Uani 1 1 d . . . . . 
C8 C 1.2367(3) 0.5666(3) 0.82810(9) 0.0229(5) Uani 1 1 d . . . . . 
C9 C 1.3497(3) 0.5248(3) 0.87570(10) 0.0242(5) Uani 1 1 d . . . . . 
C10 C 1.4373(3) 0.4848(3) 0.91376(11) 0.0335(6) Uani 1 1 d . . . . . 
C11 C 0.9414(3) 0.5506(3) 0.78357(8) 0.0163(4) Uani 1 1 d . . . . . 
C12 C 0.7675(3) 0.4603(3) 0.78159(8) 0.0165(4) Uani 1 1 d . . . . . 
C13 C 0.6485(3) 0.5257(3) 0.73651(8) 0.0160(4) Uani 1 1 d . . . . . 
C14 C 0.4400(3) 0.4455(4) 0.67517(10) 0.0301(5) Uani 1 1 d . . . . . 
C15 C 0.5922(3) 0.5167(4) 0.64243(10) 0.0295(5) Uani 1 1 d . . . . . 
H1 H 1.128(4) 0.261(4) 0.8381(11) 0.034(7) Uiso 1 1 d . . . . . 
H2B H 0.820(4) 0.423(4) 1.0076(12) 0.037(8) Uiso 1 1 d . . . . . 
H3A H 0.777(3) 0.709(3) 1.0250(10) 0.020(6) Uiso 1 1 d . . . . . 
H4A H 0.844(3) 0.907(4) 0.9586(11) 0.028(7) Uiso 1 1 d . . . . . 
H5A H 0.970(3) 0.834(3) 0.8715(10) 0.027(7) Uiso 1 1 d . . . . . 
H8A H 1.282(3) 0.515(3) 0.7952(11) 0.023(6) Uiso 1 1 d . . . . . 
H8B H 1.233(3) 0.688(4) 0.8216(10) 0.024(6) Uiso 1 1 d . . . . . 
H10 H 1.506(4) 0.458(4) 0.9411(13) 0.051(9) Uiso 1 1 d . . . . . 
H11A H 0.924(3) 0.675(3) 0.7845(9) 0.021(6) Uiso 1 1 d . . . . . 
H11B H 1.011(3) 0.523(3) 0.7509(10) 0.015(5) Uiso 1 1 d . . . . . 
H12A H 0.786(3) 0.341(3) 0.7749(10) 0.020(6) Uiso 1 1 d . . . . . 
H12B H 0.707(3) 0.472(3) 0.8154(11) 0.023(6) Uiso 1 1 d . . . . . 
H13A H 0.604(3) 0.635(3) 0.7452(9) 0.012(5) Uiso 1 1 d . . . . . 
H14A H 0.341(4) 0.519(4) 0.6780(12) 0.040(8) Uiso 1 1 d . . . . . 
H14B H 0.403(5) 0.347(5) 0.6598(15) 0.067(11) Uiso 1 1 d . . . . . 
H15A H 0.629(4) 0.447(4) 0.6122(14) 0.055(10) Uiso 1 1 d . . . . . 
H15B H 0.569(3) 0.625(3) 0.6278(11) 0.027(7) Uiso 1 1 d . . . . . 
  
loop_ 
 _atom_site_aniso_label 
 _atom_site_aniso_U_11 
 _atom_site_aniso_U_22 
 _atom_site_aniso_U_33 
 _atom_site_aniso_U_23 
 _atom_site_aniso_U_13 
 _atom_site_aniso_U_12 
S1 0.0192(2) 0.0124(2) 0.0181(2) 0.00072(18) -0.00569(19) 0.00033(19) 
N1 0.0206(9) 0.0166(8) 0.0175(8) -0.0035(6) -0.0022(7) 0.0062(8) 
O1 0.0284(8) 0.0201(7) 0.0269(8) 0.0045(6) -0.0094(7) 0.0050(6) 
O2 0.0264(8) 0.0181(7) 0.0317(8) 0.0012(6) -0.0091(7) -0.0066(6) 
O3 0.0219(7) 0.0306(8) 0.0119(6) 0.0051(6) -0.0029(6) -0.0064(6) 
O4 0.0174(8) 0.0261(7) 0.0173(7) 0.0044(6) -0.0038(6) -0.0046(6) 
C1 0.0140(9) 0.0132(8) 0.0155(8) -0.0001(7) -0.0027(7) -0.0014(7) 
C2 0.0168(9) 0.0241(10) 0.0148(9) 0.0026(8) 0.0007(8) -0.0046(8) 
C3 0.0219(10) 0.0284(11) 0.0152(10) -0.0059(8) 0.0036(8) -0.0002(9) 
C4 0.0242(11) 0.0183(11) 0.0210(10) -0.0040(8) -0.0020(8) 0.0036(8) 
C5 0.0183(9) 0.0162(8) 0.0176(8) 0.0014(8) -0.0015(7) -0.0024(8) 
C6 0.0110(8) 0.0167(8) 0.0113(8) 0.0005(7) -0.0026(7) -0.0005(8) 
C7 0.0145(9) 0.0163(9) 0.0138(8) -0.0011(7) 0.0003(7) 0.0008(8) 
C8 0.0161(10) 0.0342(13) 0.0184(10) -0.0020(9) 0.0028(8) -0.0028(9) 
C9 0.0142(9) 0.0309(12) 0.0275(11) -0.0083(9) 0.0026(9) -0.0007(9) 
C10 0.0232(12) 0.0433(14) 0.0340(13) -0.0104(11) -0.0080(10) 0.0043(11) 
C11 0.0172(10) 0.0194(10) 0.0122(8) 0.0011(7) 0.0002(8) -0.0011(8) 
C12 0.0187(10) 0.0173(10) 0.0136(9) 0.0017(7) 0.0000(8) -0.0013(8) 
C13 0.0170(9) 0.0147(10) 0.0164(9) -0.0004(7) -0.0004(8) 0.0000(8) 
C14 0.0235(12) 0.0448(15) 0.0218(11) 0.0090(10) -0.0078(9) -0.0051(11) 
C15 0.0327(13) 0.0367(14) 0.0191(10) 0.0086(10) -0.0102(9) -0.0120(11) 
  
_geom_special_details 
; 
 All esds (except the esd in the dihedral angle between two l.s. planes) 
 are estimated using the full covariance matrix.  The cell esds are taken 
 into account individually in the estimation of esds in distances, angles 
 and torsion angles; correlations between esds in cell parameters are only 
 used when they are defined by crystal symmetry.  An approximate (isotropic) 
 treatment of cell esds is used for estimating esds involving l.s. planes. 
; 
  
loop_ 
 _geom_bond_atom_site_label_1 
 _geom_bond_atom_site_label_2 
 _geom_bond_distance 
 _geom_bond_site_symmetry_2 
 _geom_bond_publ_flag 
S1 O2 1.4379(16) . ? 
S1 O1 1.4383(15) . ? 
S1 N1 1.6361(18) . ? 
S1 C1 1.746(2) . ? 
N1 C7 1.480(3) . ? 
O3 C13 1.425(2) . ? 
O3 C15 1.445(3) . ? 
O4 C13 1.413(2) . ? 
O4 C14 1.425(3) . ? 
C1 C2 1.383(3) . ? 
C1 C6 1.384(3) . ? 
C2 C3 1.385(3) . ? 
C3 C4 1.390(3) . ? 
C4 C5 1.387(3) . ? 
C5 C6 1.391(3) . ? 
C6 C7 1.521(3) . ? 
C7 C8 1.541(3) . ? 
C7 C11 1.543(3) . ? 
C8 C9 1.468(3) . ? 
C9 C10 1.175(3) . ? 
C11 C12 1.523(3) . ? 
C12 C13 1.505(3) . ? 
C14 C15 1.519(3) . ? 
  
loop_ 
 _geom_angle_atom_site_label_1 
 _geom_angle_atom_site_label_2 
 _geom_angle_atom_site_label_3 
 _geom_angle 
 _geom_angle_site_symmetry_1 
 _geom_angle_site_symmetry_3 
 _geom_angle_publ_flag 
O2 S1 O1 115.30(10) . . ? 
O2 S1 N1 111.35(9) . . ? 
O1 S1 N1 110.84(10) . . ? 
O2 S1 C1 108.98(9) . . ? 
O1 S1 C1 114.11(9) . . ? 
N1 S1 C1 94.39(9) . . ? 
C7 N1 S1 115.63(13) . . ? 
C13 O3 C15 105.46(17) . . ? 
C13 O4 C14 105.85(16) . . ? 
C2 C1 C6 123.63(18) . . ? 
C2 C1 S1 125.90(16) . . ? 
C6 C1 S1 110.34(14) . . ? 
C1 C2 C3 117.03(19) . . ? 
C2 C3 C4 120.6(2) . . ? 
C5 C4 C3 121.3(2) . . ? 
C4 C5 C6 118.85(18) . . ? 
C1 C6 C5 118.58(17) . . ? 
C1 C6 C7 114.62(16) . . ? 
C5 C6 C7 126.80(17) . . ? 
N1 C7 C6 104.84(15) . . ? 
N1 C7 C8 110.31(17) . . ? 
C6 C7 C8 110.57(16) . . ? 
N1 C7 C11 110.20(16) . . ? 
C6 C7 C11 111.43(15) . . ? 
C8 C7 C11 109.42(16) . . ? 
C9 C8 C7 113.10(18) . . ? 
C10 C9 C8 177.2(3) . . ? 
C12 C11 C7 112.91(16) . . ? 
C13 C12 C11 113.39(17) . . ? 
O4 C13 O3 104.82(15) . . ? 
O4 C13 C12 109.61(16) . . ? 
O3 C13 C12 111.66(17) . . ? 
O4 C14 C15 104.84(18) . . ? 
O3 C15 C14 104.59(18) . . ? 
  
_refine_diff_density_max    0.316 
_refine_diff_density_min   -0.247 
_refine_diff_density_rms    0.043 
  
_shelx_res_file 
; 
  
    erj22.res created by SHELXL-2014/7 
  
  
TITL erj22 in P2(1)2(1)2(1) 
CELL 0.71073   7.71710   7.94860  23.81600  90.0000  90.0000  90.0000 
ZERR    4.00   0.00050   0.00050   0.00140   0.0000   0.0000   0.0000 
LATT -1 
SYMM 0.5-X, -Y, 0.5+Z 
SYMM -X, 0.5+Y, 0.5-Z 
SYMM 0.5+X, 0.5-Y, -Z 
SFAC C H N O S 
UNIT 60 68 4 16 4 
TEMP -140.000 
SIZE 0.108 0.16 0.288 
L.S. 12 
acta 51 
  
WGHT    0.036300    0.349000 
FVAR       0.21663 
S1    5    0.961897    0.260509    0.905364    11.00000    0.01916    0.01242 = 
         0.01809    0.00072   -0.00569    0.00033 
N1    3    1.045623    0.321403    0.845611    11.00000    0.02062    0.01665 = 
         0.01753   -0.00350   -0.00225    0.00625 
O1    4    1.086091    0.166507    0.937665    11.00000    0.02838    0.02006 = 
         0.02686    0.00446   -0.00941    0.00499 
O2    4    0.797363    0.179223    0.897201    11.00000    0.02640    0.01809 = 
         0.03168    0.00116   -0.00912   -0.00661 
O3    4    0.730937    0.527525    0.682989    11.00000    0.02186    0.03062 = 
         0.01191    0.00506   -0.00288   -0.00639 
O4    4    0.506464    0.415118    0.730080    11.00000    0.01738    0.02609 = 
         0.01732    0.00442   -0.00382   -0.00459 
C1    1    0.926614    0.464741    0.929814    11.00000    0.01397    0.01322 = 
         0.01550   -0.00006   -0.00269   -0.00140 
C2    1    0.854492    0.507721    0.981001    11.00000    0.01678    0.02414 = 
         0.01484    0.00258    0.00072   -0.00460 
C3    1    0.824971    0.677127    0.990784    11.00000    0.02189    0.02843 = 
         0.01516   -0.00591    0.00357   -0.00022 
C4    1    0.867614    0.796652    0.950490    11.00000    0.02415    0.01834 = 
         0.02099   -0.00397   -0.00196    0.00356 
C5    1    0.940741    0.750520    0.899565    11.00000    0.01827    0.01617 = 
         0.01755    0.00139   -0.00148   -0.00241 
C6    1    0.970557    0.580898    0.888945    11.00000    0.01099    0.01673 = 
         0.01134    0.00054   -0.00259   -0.00049 
C7    1    1.048901    0.505372    0.836066    11.00000    0.01450    0.01630 = 
         0.01384   -0.00110    0.00030    0.00077 
C8    1    1.236712    0.566585    0.828098    11.00000    0.01606    0.03418 = 
         0.01838   -0.00202    0.00278   -0.00275 
C9    1    1.349713    0.524845    0.875695    11.00000    0.01416    0.03087 = 
         0.02751   -0.00827    0.00256   -0.00073 
C10   1    1.437289    0.484832    0.913757    11.00000    0.02322    0.04327 = 
         0.03397   -0.01039   -0.00798    0.00432 
C11   1    0.941391    0.550580    0.783570    11.00000    0.01717    0.01943 = 
         0.01221    0.00112    0.00017   -0.00114 
C12   1    0.767467    0.460301    0.781589    11.00000    0.01870    0.01729 = 
         0.01356    0.00166    0.00000   -0.00135 
C13   1    0.648481    0.525703    0.736511    11.00000    0.01697    0.01473 = 
         0.01642   -0.00039   -0.00039    0.00003 
C14   1    0.440028    0.445461    0.675168    11.00000    0.02353    0.04480 = 
         0.02183    0.00899   -0.00783   -0.00511 
C15   1    0.592153    0.516668    0.642427    11.00000    0.03267    0.03675 = 
         0.01905    0.00863   -0.01023   -0.01202 
H1    2    1.128488    0.261113    0.838052    11.00000    0.03415 
H2B   2    0.819834    0.423463    1.007617    11.00000    0.03674 
H3A   2    0.776886    0.709178    1.024963    11.00000    0.01979 
H4A   2    0.844031    0.907174    0.958601    11.00000    0.02792 
H5A   2    0.970270    0.833601    0.871518    11.00000    0.02724 
H8A   2    1.281526    0.514895    0.795247    11.00000    0.02276 
H8B   2    1.233395    0.687928    0.821625    11.00000    0.02401 
H10   2    1.506226    0.458237    0.941141    11.00000    0.05055 
H11A  2    0.923915    0.675045    0.784501    11.00000    0.02051 
H11B  2    1.010571    0.522592    0.750945    11.00000    0.01501 
H12A  2    0.786033    0.340929    0.774855    11.00000    0.01996 
H12B  2    0.706646    0.471999    0.815420    11.00000    0.02266 
H13A  2    0.603997    0.635042    0.745204    11.00000    0.01238 
H14A  2    0.341034    0.519141    0.677984    11.00000    0.03974 
H14B  2    0.402508    0.346694    0.659782    11.00000    0.06680 
H15A  2    0.629446    0.447044    0.612174    11.00000    0.05463 
H15B  2    0.568739    0.625480    0.627764    11.00000    0.02682 
HKLF 4 
  
REM  erj22 in P2(1)2(1)2(1) 
REM R1 =  0.0294 for    3283 Fo > 4sig(Fo)  and  0.0342 for all    3562 data 
REM    258 parameters refined using      0 restraints 
  
END 
  
WGHT      0.0363      0.3490 
  
REM Highest difference peak  0.316,  deepest hole -0.247,  1-sigma level  0.043 
Q1    1   0.9467  0.3722  0.9176  11.00000  0.05    0.32 
Q2    1   1.0185  0.2700  0.8749  11.00000  0.05    0.28 
Q3    1   1.0238  0.5422  0.8634  11.00000  0.05    0.27 
Q4    1   1.1368  0.5389  0.8305  11.00000  0.05    0.26 
Q5    1   0.9854  0.5314  0.8130  11.00000  0.05    0.24 
Q6    1   0.9305  0.5174  0.9086  11.00000  0.05    0.23 
Q7    1   0.8636  0.7552  0.9191  11.00000  0.05    0.23 
Q8    1   0.8647  0.4843  0.7807  11.00000  0.05    0.20 
Q9    1   1.0459  0.4198  0.8426  11.00000  0.05    0.20 
Q10   1   0.8127  0.5937  0.9781  11.00000  0.05    0.20 
Q11   1   0.8425  0.2325  0.9197  11.00000  0.05    0.19 
Q12   1   0.8564  0.4780  0.9493  11.00000  0.05    0.19 
Q13   1   0.9559  0.7752  0.9303  11.00000  0.05    0.18 
Q14   1   0.5057  0.5194  0.6634  11.00000  0.05    0.17 
Q15   1   1.0695  0.2529  0.9267  11.00000  0.05    0.17 
Q16   1   1.0172  0.1563  0.9139  11.00000  0.05    0.17 
Q17   1   1.3350  0.4819  0.9079  11.00000  0.05    0.17 
Q18   1   1.4406  0.5654  0.8920  11.00000  0.05    0.17 
Q19   1   0.9100  0.6673  0.8867  11.00000  0.05    0.16 
Q20   1   0.7182  0.5061  0.7586  11.00000  0.05    0.16 
; 
_shelx_res_checksum   12897 
  
_shelx_hkl_file 
; 
  -1   0   0   -0.41    0.05 
   1   0   0   -0.46    0.05 
   1   0   0   -0.45    0.05 
  -1   0   0   -0.41    0.06 
  -2   0   0  387.84    7.51 
   2   0   0  400.64    7.46 
   2   0   0  401.47    7.51 
  -2   0   0  392.19    7.46 
  -3   0   0   -0.03    0.12 
  -3   0   0   -0.09    0.11 
   3   0   0    0.01    0.14 
   3   0   0    0.15    0.12 
  -4   0   0   79.37    1.88 
  -4   0   0   79.73    1.96 
   4   0   0   84.06    1.88 
   4   0   0   81.00    1.96 
  -5   0   0   -0.29    0.16 
  -5   0   0   -0.14    0.16 
   5   0   0   -0.28    0.15 
   5   0   0   -0.28    0.17 
   6   0   0   11.16    0.62 
  -6   0   0   10.50    0.69 
  -6   0   0    9.92    0.62 
   6   0   0   10.57    0.70 
  -7   0   0    0.14    0.24 
   7   0   0   -0.29    0.23 
  -7   0   0   -0.19    0.35 
   8   0   0   14.52    0.96 
  -8   0   0   14.76    0.96 
  -9   0   0   -0.14    0.33 
   9   0   0    0.24    0.34 
 -10   0   0   54.05    2.17 
  10   0   0   54.94    2.17 
   0   1   0   -0.40    0.06 
   0   1   0   -0.45    0.05 
   0  -1   0   -0.03    0.07 
   1  -1   0  147.76    2.92 
  -1  -1   0  149.43    2.93 
  -1   1   0  151.04    2.94 
  -1  -1   0  150.24    2.88 
   1   1   0  146.04    2.78 
   1   1   0  147.84    2.92 
  -1   1   0  146.80    2.85 
   1  -1   0  152.12    2.84 
  -2   1   0   47.78    1.10 
   2   1   0   47.52    1.11 
  -2  -1   0   48.41    1.00 
   2  -1   0   46.84    1.03 
  -2   1   0   46.83    1.16 
   2   1   0   49.19    1.16 
   2  -1   0   47.27    1.16 
  -2  -1   0   48.01    1.17 
   3   1   0    2.70    0.26 
   3  -1   0    2.70    0.22 
  -3   1   0    2.79    0.30 
  -3  -1   0    2.61    0.22 
  -3  -1   0    2.74    0.28 
  -3   1   0    2.66    0.25 
   3   1   0    2.56    0.29 
   3  -1   0    2.52    0.30 
  -4  -1   0    6.58    0.47 
  -4   1   0    6.37    0.41 
  -4  -1   0    6.24    0.35 
  -4   1   0    6.21    0.44 
   4   1   0    6.00    0.41 
   4   1   0    6.19    0.43 
   4  -1   0    6.01    0.34 
   5  -1   0    1.05    0.31 
  -5  -1   0    0.48    0.24 
  -5   1   0    0.85    0.27 
   5  -1   0    0.56    0.19 
   5   1   0    0.92    0.27 
  -5   1   0    1.09    0.27 
  -5  -1   0    0.87    0.20 
   5   1   0    0.56    0.24 
   6  -1   0   32.19    1.25 
  -6  -1   0   31.65    1.25 
  -6   1   0   31.59    1.19 
   6  -1   0   32.62    1.19 
  -6   1   0   33.24    1.20 
   6   1   0   31.20    1.20 
   6   1   0   33.98    1.17 
  -6  -1   0   31.08    1.07 
   7  -1   0    3.30    0.52 
  -7  -1   0    3.50    0.56 
  -7   1   0    4.27    0.53 
   7   1   0    4.17    0.55 
  -7   1   0    3.89    0.53 
   7   1   0    3.52    0.48 
   8  -1   0    0.20    0.34 
  -8  -1   0    0.32    0.32 
  -8   1   0    0.59    0.33 
   8   1   0    0.40    0.34 
   9   1   0   -0.02    0.35 
  -9  -1   0    0.16    0.33 
  -9   1   0    0.24    0.35 
   9  -1   0    0.36    0.40 
 -10  -1   0    6.98    0.95 
  10   1   0    6.59    0.87 
  10  -1   0    5.70    0.89 
   0   2   0  396.63    7.55 
   0   2   0  397.47    7.54 
   0  -2   0  399.83    7.56 
   0  -2   0  399.87    7.52 
   1  -2   0   91.14    1.99 
  -1   2   0   94.71    2.02 
  -1  -2   0   95.26    1.95 
  -1   2   0   93.32    1.91 
  -1  -2   0   93.43    1.99 
   1  -2   0   94.13    1.88 
   1   2   0   91.59    2.00 
   1   2   0   92.08    1.84 
  -2  -2   0   41.69    1.04 
  -2   2   0   42.30    1.00 
   2  -2   0   42.17    0.96 
   2  -2   0   42.76    1.12 
   2   2   0   41.71    0.87 
   2   2   0   42.38    1.12 
  -2   2   0   42.29    1.15 
  -2  -2   0   41.31    1.12 
  -3   2   0    9.14    0.51 
  -3  -2   0   10.18    0.47 
  -3   2   0    9.49    0.43 
   3  -2   0   10.16    0.38 
  -3  -2   0    9.62    0.52 
   3   2   0    9.29    0.51 
  -3  -2   0   10.37    0.32 
   3  -2   0   10.34    0.54 
   4  -2   0    0.27    0.13 
  -4  -2   0    0.24    0.12 
  -4  -2   0    0.03    0.18 
  -4   2   0    0.27    0.17 
   4   2   0    0.31    0.21 
  -4   2   0    0.18    0.21 
   4   2   0    0.03    0.14 
   4  -2   0    0.04    0.20 
  -5  -2   0   12.92    0.76 
  -5   2   0   13.24    0.66 
   5  -2   0   13.17    0.54 
  -5   2   0   12.86    0.72 
   5   2   0   13.43    0.73 
   5   2   0   13.16    0.68 
  -6   2   0    9.35    0.70 
   6   2   0    9.47    0.67 
  -6  -2   0    9.34    0.72 
   6   2   0    8.67    0.63 
   6  -2   0    8.29    0.69 
  -6   2   0    8.95    0.63 
   7   2   0    0.81    0.35 
   7  -2   0    1.01    0.39 
   7   2   0    0.47    0.28 
  -7   2   0    1.41    0.36 
  -7  -2   0    0.70    0.34 
  -7   2   0    0.73    0.35 
  -8  -2   0    7.70    0.77 
   8  -2   0    8.07    0.80 
   8   2   0    6.42    0.69 
  -8   2   0    6.13    0.71 
  -8   2   0    6.88    0.75 
  -9  -2   0   -0.65    0.27 
   9   2   0    0.40    0.33 
   9  -2   0    0.98    0.42 
  10  -2   0    4.48    1.02 
   0  -3   0    0.08    0.12 
   0   3   0   -0.10    0.12 
   0   3   0   -0.12    0.11 
   0  -3   0   -0.18    0.12 
  -1   3   0   86.99    1.88 
  -1  -3   0   85.36    1.93 
   1   3   0   85.88    1.98 
  -1  -3   0   86.41    1.91 
   1   3   0   86.42    1.81 
   1  -3   0   82.75    1.94 
  -1   3   0   85.63    1.98 
   1  -3   0   86.25    1.83 
   2   3   0    6.90    0.27 
  -2   3   0    8.13    0.36 
  -2  -3   0    6.64    0.38 
   2   3   0    7.08    0.46 
   2  -3   0    7.59    0.35 
  -2   3   0    7.10    0.46 
  -2  -3   0    6.61    0.44 
  -3   3   0   32.37    1.10 
  -3  -3   0   31.85    0.98 
  -3  -3   0   34.51    0.73 
   3   3   0   30.92    1.07 
   3  -3   0   33.23    1.08 
  -3   3   0   33.92    0.92 
  -3  -3   0   31.44    1.08 
   3  -3   0   33.25    0.87 
  -4   3   0   16.74    0.66 
   4   3   0   17.15    0.83 
  -4  -3   0   15.32    0.79 
  -4   3   0   15.56    0.79 
  -4  -3   0   17.28    0.71 
   4  -3   0   16.75    0.81 
   4  -3   0   16.93    0.59 
   5   3   0    1.16    0.28 
   5  -3   0    1.12    0.35 
  -5   3   0    1.15    0.36 
  -5  -3   0    0.69    0.28 
   5   3   0    0.75    0.32 
  -5   3   0    0.80    0.24 
  -6   3   0   18.06    0.99 
  -6   3   0   17.94    0.84 
   6  -3   0   16.05    0.92 
   6   3   0   19.28    0.89 
   6   3   0   17.61    0.95 
  -6  -3   0   18.24    1.01 
  -7   3   0    6.02    0.69 
  -7  -3   0    7.19    0.73 
   7  -3   0    7.56    0.73 
   7   3   0    7.52    0.73 
   7   3   0    7.97    0.67 
   8  -3   0   36.59    1.62 
   8   3   0   37.78    1.54 
  -8   3   0   37.22    1.62 
   8   3   0   42.23    1.63 
  -8  -3   0   35.62    1.64 
   9  -3   0    1.04    0.47 
  -9  -3   0    0.71    0.44 
  -9   3   0    0.60    0.45 
   0  -4   0  552.75   10.45 
   0  -4   0  544.27   10.52 
   0   4   0  551.11   10.49 
   0   4   0  542.39   10.52 
  -1  -4   0   60.18    1.55 
   1   4   0   61.10    1.62 
   1  -4   0   58.44    1.58 
   1   4   0   61.08    1.45 
  -1   4   0   61.13    1.52 
   1  -4   0   63.58    1.47 
  -1   4   0   63.59    1.62 
  -1  -4   0   61.30    1.55 
   2   4   0   20.73    0.84 
  -2  -4   0   21.36    0.76 
  -2   4   0   19.29    0.84 
   2   4   0   20.65    0.60 
  -2  -4   0   20.36    0.81 
   2  -4   0   19.39    0.81 
   2  -4   0   21.33    0.67 
  -2   4   0   19.44    0.69 
  -3   4   0  190.36    4.29 
  -3  -4   0  192.86    4.11 
  -3   4   0  201.05    3.99 
   3   4   0  191.97    4.27 
   3  -4   0  193.22    4.26 
   3  -4   0  203.93    4.00 
  -3  -4   0  194.06    4.25 
  -4   4   0    0.44    0.19 
   4   4   0    0.28    0.26 
  -4   4   0    0.40    0.29 
  -4  -4   0    0.48    0.29 
   4  -4   0    0.54    0.26 
  -4  -4   0    0.11    0.19 
   5   4   0    1.59    0.41 
  -5  -4   0    1.22    0.35 
  -5   4   0    0.91    0.39 
   5  -4   0    1.35    0.37 
   5   4   0    1.00    0.27 
  -6   4   0    3.91    0.60 
   6   4   0    3.33    0.55 
  -6  -4   0    4.95    0.66 
   6   4   0    5.22    0.52 
   6  -4   0    4.52    0.61 
   7  -4   0    4.69    0.64 
  -7   4   0    4.75    0.69 
  -7  -4   0    5.10    0.71 
   7   4   0    5.75    0.59 
   7   4   0    4.14    0.62 
   8   4   0    4.77    0.72 
   8  -4   0    3.49    0.68 
  -8   4   0    4.33    0.69 
  -8  -4   0    3.13    0.61 
  -9   4   0    1.75    0.56 
  -9  -4   0    1.34    0.53 
   9  -4   0    1.95    0.56 
   0   5   0    0.00    0.18 
   0  -5   0   -0.08    0.16 
   0   5   0   -0.15    0.16 
   0  -5   0    0.06    0.17 
  -1  -5   0    6.10    0.47 
  -1   5   0    5.87    0.43 
  -1   5   0    6.44    0.51 
  -1  -5   0    5.71    0.45 
   1  -5   0    6.16    0.50 
   1   5   0    6.57    0.43 
   1  -5   0    6.97    0.43 
   1   5   0    6.64    0.53 
  -2   5   0   37.60    1.12 
   2  -5   0   37.10    1.05 
  -2   5   0   36.58    1.29 
  -2  -5   0   35.15    1.16 
   2  -5   0   37.66    1.26 
  -2  -5   0   36.26    1.22 
   2   5   0   36.06    1.03 
   2   5   0   36.49    1.28 
  -3  -5   0    2.69    0.37 
  -3   5   0    2.57    0.46 
   3   5   0    3.35    0.50 
  -3  -5   0    2.41    0.40 
   3  -5   0    2.72    0.43 
  -3   5   0    2.91    0.33 
   3  -5   0    2.91    0.32 
  -4  -5   0   36.79    1.26 
   4   5   0   34.95    1.40 
   4  -5   0   39.08    1.39 
  -4  -5   0   34.94    1.36 
  -4   5   0   39.02    1.46 
  -5  -5   0    1.57    0.41 
   5  -5   0    0.92    0.36 
  -5  -5   0    1.31    0.31 
  -5   5   0    1.07    0.42 
   5   5   0    1.06    0.38 
  -6  -5   0   25.86    1.28 
   6   5   0   25.28    1.12 
   6   5   0   27.01    1.32 
  -6   5   0   26.61    1.34 
   6  -5   0   27.35    1.29 
   7  -5   0    8.57    0.82 
  -7  -5   0    7.91    0.82 
   7   5   0    9.94    0.89 
   7   5   0    8.95    0.98 
  -7   5   0    6.77    0.77 
   8  -5   0   -0.15    0.35 
  -8   5   0   -0.06    0.38 
   8   5   0   -0.58    0.36 
  -8  -5   0   -0.16    0.33 
   9   5   0    1.10    0.53 
   0   6   0    8.85    0.64 
   0   6   0    9.12    0.59 
   0  -6   0    9.29    0.62 
   0  -6   0    9.50    0.59 
  -1  -6   0   10.58    0.64 
  -1   6   0   11.74    0.72 
   1   6   0   10.04    0.69 
   1  -6   0    9.95    0.58 
   1   6   0   11.28    0.60 
  -1   6   0    9.75    0.62 
   1  -6   0   10.30    0.67 
  -1  -6   0   10.41    0.64 
  -2   6   0   64.67    1.96 
  -2  -6   0   66.88    1.91 
  -2   6   0   69.11    1.80 
   2  -6   0   64.77    1.94 
   2   6   0   63.79    1.98 
  -2  -6   0   65.03    1.84 
  -3   6   0    0.83    0.34 
  -3   6   0    1.03    0.26 
  -3  -6   0    1.23    0.32 
  -3  -6   0    1.27    0.35 
   3  -6   0    1.36    0.36 
   3   6   0    1.39    0.41 
   4   6   0   56.62    1.95 
  -4  -6   0   57.85    1.91 
  -4   6   0   58.85    1.98 
   4  -6   0   55.25    1.89 
  -4  -6   0   61.58    1.79 
  -5  -6   0   -0.52    0.22 
  -5   6   0    0.11    0.32 
   5  -6   0   -0.31    0.28 
  -5  -6   0   -0.15    0.21 
   5   6   0    0.06    0.35 
  -6   6   0    2.54    0.58 
   6   6   0    2.18    0.57 
   6   6   0    1.71    0.41 
   6  -6   0    2.37    0.52 
  -6  -6   0    1.67    0.48 
   7  -6   0    0.59    0.44 
  -7  -6   0    1.29    0.49 
   7   6   0    2.16    0.58 
  -7   6   0    1.16    0.51 
  -8   6   0    0.58    0.52 
   8   6   0    0.13    0.48 
   0  -7   0    0.03    0.22 
   0   7   0   -0.11    0.22 
   0  -7   0    0.19    0.23 
   0   7   0    0.01    0.26 
  -1   7   0    6.40    0.63 
  -1  -7   0    6.43    0.59 
   1   7   0    5.51    0.63 
  -1  -7   0    6.47    0.59 
  -1   7   0    6.21    0.56 
   1  -7   0    4.88    0.55 
  -2   7   0    1.06    0.36 
  -2  -7   0    1.54    0.38 
   2  -7   0    1.46    0.39 
  -2   7   0    1.15    0.31 
  -2  -7   0    1.32    0.36 
   2   7   0    1.45    0.40 
   3  -7   0    5.14    0.61 
  -3  -7   0    4.28    0.55 
   3   7   0    6.43    0.71 
  -3   7   0    4.42    0.63 
  -3  -7   0    5.21    0.61 
   4   7   0   10.67    0.90 
  -4  -7   0   10.79    0.75 
   4  -7   0   10.50    0.84 
  -4  -7   0   12.50    0.90 
  -4   7   0   10.06    0.88 
   5  -7   0   17.10    1.09 
  -5  -7   0   17.99    1.10 
   5   7   0   12.96    1.03 
  -5   7   0   17.63    1.17 
  -6   7   0    0.16    0.42 
   6   7   0    0.12    0.44 
   6  -7   0    0.43    0.41 
  -6  -7   0    0.89    0.42 
   7   7   0   21.81    1.43 
  -7  -7   0   22.70    1.42 
  -7   7   0   21.39    1.43 
   7  -7   0   22.35    1.38 
   0   8   0    0.88    0.35 
   0  -8   0    0.16    0.28 
   1   8   0    1.41    0.40 
  -1  -8   0    0.98    0.36 
  -1   8   0    0.59    0.35 
  -1   8   0    0.73    0.33 
   1  -8   0    1.13    0.38 
  -2  -8   0   17.39    0.98 
   2   8   0   17.43    1.08 
   2  -8   0   16.44    1.01 
  -2   8   0   17.79    1.06 
  -2  -8   0   19.01    1.02 
  -3   8   0    0.82    0.42 
  -3  -8   0    1.28    0.39 
   3  -8   0    1.47    0.43 
  -3  -8   0    0.69    0.36 
   3   8   0    2.06    0.54 
   4   8   0    0.25    0.38 
  -4   8   0    0.12    0.38 
   4  -8   0    0.56    0.36 
  -4  -8   0    0.05    0.30 
  -5  -8   0    1.09    0.45 
   5  -8   0    1.20    0.47 
   5   8   0    2.31    0.61 
  -5   8   0    0.84    0.48 
  -6  -8   0    0.27    0.39 
   6  -8   0    0.41    0.42 
   6   8   0    0.10    0.45 
  -6   8   0    0.72    0.52 
   0   9   0   -0.13    0.30 
   0  -9   0    0.26    0.32 
   1  -9   0   -0.13    0.31 
  -1  -9   0   -0.12    0.29 
   1   9   0    0.24    0.37 
   2  -9   0   14.40    1.03 
  -2  -9   0   17.47    1.08 
  -2   9   0   16.62    1.10 
   2   9   0   16.61    1.12 
  -3   9   0    0.26    0.41 
   3   9   0   -0.28    0.35 
   3  -9   0    0.36    0.38 
   4   9   0   13.49    1.13 
  -4   9   0   13.05    1.09 
   4  -9   0   13.05    1.06 
  -4  -9   0   15.80    1.11 
  -5  -9   0   -0.06    0.36 
   0  10   0   10.77    0.99 
   0 -10   0    7.26    0.90 
   1 -10   0   27.34    1.48 
   1  10   0   29.46    1.54 
  -1 -10   0   30.00    1.53 
   2 -10   0    6.42    0.88 
   2  10   0    5.64    0.84 
  -3  10   0   -0.16    0.40 
  -1   0  -1  133.90    2.55 
   1   0   1  130.52    2.53 
  -1   0  -1  132.56    2.54 
   1   0  -1  132.14    2.50 
  -1   0   1  133.77    2.52 
  -1   0   1  129.57    2.56 
   1   0   1  131.97    2.55 
   1   0  -1  131.79    2.56 
  -2   0   1  626.72   11.70 
   2   0  -1  580.91   11.51 
  -2   0  -1  628.19   11.59 
   2   0   1  616.21   11.57 
   2   0  -1  623.16   11.60 
  -2   0   1  609.62   11.60 
  -2   0  -1  624.36   11.56 
   2   0   1  633.59   11.56 
  -3   0  -1   67.46    1.53 
   3   0  -1   65.28    1.58 
  -3   0  -1   64.80    1.56 
   3   0   1   65.24    1.55 
  -3   0   1   66.30    1.59 
   3   0   1   66.44    1.52 
   3   0  -1   66.63    1.48 
  -3   0   1   66.93    1.50 
  -4   0  -1    0.48    0.19 
   4   0  -1    0.58    0.17 
  -4   0   1    0.14    0.17 
   4   0   1    0.72    0.19 
  -4   0   1    0.48    0.19 
  -4   0  -1    0.41    0.17 
   4   0  -1    0.12    0.17 
   4   0   1    0.55    0.19 
   5   0  -1    1.42    0.30 
  -5   0  -1    1.47    0.28 
   5   0   1    1.47    0.31 
   5   0  -1    1.97    0.28 
  -5   0   1    1.52    0.28 
  -5   0   1    1.61    0.31 
  -5   0  -1    1.32    0.28 
   5   0   1    1.47    0.27 
   6   0  -1   33.00    1.07 
   6   0   1   32.12    1.19 
   6   0  -1   31.43    1.22 
  -6   0  -1   29.57    1.10 
  -6   0  -1   29.95    1.18 
  -6   0   1   30.46    1.20 
   6   0   1   34.28    1.12 
  -6   0   1   32.16    1.10 
  -7   0   1   30.54    1.29 
  -7   0  -1   29.08    1.25 
  -7   0  -1   31.38    1.19 
   7   0  -1   33.44    1.31 
   7   0   1   30.82    1.27 
  -8   0  -1   21.94    1.15 
  -8   0   1   23.56    1.22 
   8   0  -1   22.80    1.19 
   8   0   1   24.17    1.21 
   9   0   1    7.61    0.80 
  -9   0   1    6.04    0.81 
  -9   0  -1    6.82    0.80 
   9   0  -1    7.90    0.83 
  10   0   1    2.00    0.60 
 -10   0  -1    2.25    0.58 
  10   0  -1    2.31    0.61 
 -10   0   1    2.34    0.60 
   0   1   1   59.80    1.26 
   0  -1   1   60.54    1.27 
   0  -1  -1   61.06    1.24 
   0  -1  -1   61.62    1.26 
   0  -1   1   61.23    1.21 
   0   1  -1   61.07    1.24 
   0   1   1   61.27    1.25 
  -1  -1  -1  126.90    2.54 
  -1   1   1  126.63    2.49 
  -1   1   1  127.77    2.55 
   1  -1   1  130.66    2.48 
   1   1  -1  128.00    2.53 
   1  -1   1  126.54    2.53 
  -1  -1  -1  128.04    2.47 
  -1   1  -1  129.33    2.43 
  -1  -1   1  125.87    2.53 
   1  -1  -1  128.53    2.41 
  -1   1  -1  128.01    2.55 
   1  -1  -1  127.38    2.54 
  -1  -1   1  129.01    2.52 
   1   1   1  127.82    2.44 
   1   1   1  126.56    2.54 
   2   1  -1   61.57    1.39 
  -2   1   1   61.30    1.42 
  -2   1   1   59.73    1.37 
   2  -1   1   62.43    1.32 
  -2  -1  -1   61.23    1.43 
  -2  -1  -1   61.85    1.28 
   2  -1   1   60.55    1.41 
  -2  -1   1   61.28    1.21 
  -2  -1   1   61.19    1.42 
   2  -1  -1   60.41    1.23 
   2  -1  -1   60.45    1.41 
   2   1   1   60.59    1.33 
  -2   1  -1   60.23    1.31 
  -2   1  -1   61.25    1.41 
   2   1   1   58.42    1.39 
  -2  -1   1   60.55    1.37 
   3  -1   1   86.12    1.81 
  -3  -1  -1   85.18    1.78 
   3   1  -1   83.08    1.89 
  -3   1   1   84.23    1.89 
   3  -1   1   83.17    1.93 
  -3  -1  -1   80.89    1.94 
  -3   1   1   84.94    1.92 
   3   1  -1   82.01    1.90 
  -3   1  -1   81.26    1.92 
   3   1   1   83.75    1.92 
  -3  -1   1   84.13    1.74 
   3   1   1   85.64    1.88 
  -3   1  -1   84.77    1.86 
  -3  -1   1   81.89    1.95 
   3  -1  -1   83.71    1.95 
   3  -1  -1   85.99    1.75 
   4  -1   1   46.07    1.33 
  -4   1   1   44.96    1.28 
  -4  -1  -1   47.38    1.18 
   4  -1   1   47.10    1.19 
   4   1  -1   46.70    1.30 
  -4  -1  -1   46.05    1.34 
  -4   1   1   47.17    1.31 
   4   1  -1   47.83    1.29 
  -4   1  -1   45.71    1.25 
   4  -1  -1   44.97    1.33 
  -4  -1   1   45.51    1.12 
  -4  -1   1   44.12    1.33 
   4   1   1   45.56    1.28 
   4  -1  -1   48.11    1.14 
   4   1   1   47.72    1.27 
  -4   1  -1   45.63    1.30 
   5  -1   1    1.66    0.26 
  -5   1   1    1.53    0.30 
  -5  -1  -1    1.64    0.34 
   5   1  -1    1.95    0.32 
   5   1  -1    1.73    0.33 
  -5  -1  -1    2.08    0.28 
  -5   1   1    1.08    0.28 
   5  -1   1    1.37    0.33 
  -5   1  -1    1.03    0.26 
   5  -1  -1    1.49    0.35 
   5   1   1    1.54    0.31 
  -5  -1   1    1.13    0.23 
   5  -1  -1    1.75    0.25 
  -5   1  -1    1.60    0.32 
   5   1   1    0.74    0.24 
  -5  -1   1    0.88    0.27 
   6  -1   1    4.98    0.55 
   6   1  -1    3.84    0.49 
  -6   1   1    4.00    0.47 
   6   1  -1    5.29    0.51 
   6  -1   1    4.36    0.41 
  -6  -1  -1    4.53    0.51 
  -6   1   1    4.51    0.52 
  -6  -1  -1    4.86    0.43 
   6   1   1    4.50    0.49 
   6  -1  -1    3.84    0.51 
  -6   1  -1    5.27    0.52 
  -6  -1   1    5.19    0.55 
  -6   1  -1    5.09    0.50 
   6   1   1    6.12    0.55 
  -7   1   1    2.34    0.44 
   7   1  -1    2.24    0.44 
  -7  -1  -1    2.60    0.48 
  -7   1   1    2.84    0.46 
   7   1  -1    2.38    0.42 
   7  -1   1    3.21    0.50 
   7   1   1    3.23    0.50 
   7  -1  -1    2.21    0.48 
   7   1   1    2.71    0.45 
  -7   1  -1    2.36    0.43 
  -7   1  -1    1.99    0.42 
  -7  -1   1    2.49    0.47 
   8  -1   1    4.58    0.65 
  -8  -1  -1    5.52    0.70 
   8   1  -1    5.46    0.65 
  -8   1   1    4.04    0.60 
  -8   1  -1    5.14    0.63 
   8   1   1    4.91    0.60 
   8  -1  -1    5.67    0.73 
  -8  -1   1    5.13    0.70 
   9  -1   1    2.24    0.54 
  -9  -1  -1    2.32    0.56 
  -9   1   1    1.86    0.52 
   9   1  -1    2.30    0.54 
   9   1   1    2.37    0.54 
  -9   1  -1    1.96    0.52 
  -9  -1   1    2.63    0.60 
   9  -1  -1    2.49    0.56 
  10   1  -1    2.68    0.63 
  10  -1   1    2.30    0.63 
 -10  -1  -1    2.91    0.66 
  10  -1  -1    1.97    0.62 
 -10  -1   1    2.82    0.65 
   0  -2   1    4.71    0.28 
   0  -2  -1    4.62    0.27 
   0  -2   1    5.16    0.24 
   0   2   1    4.83    0.26 
   0   2  -1    4.39    0.25 
   0   2  -1    4.31    0.27 
   0  -2  -1    4.72    0.26 
   0   2   1    4.68    0.26 
   1   2  -1  301.22    5.79 
   1  -2   1  295.69    5.78 
  -1  -2  -1  299.71    5.78 
   1  -2   1  295.51    5.70 
  -1  -2  -1  296.60    5.70 
   1  -2   1  306.21    5.63 
  -1   2   1  304.59    5.66 
   1   2  -1  299.08    5.60 
  -1   2   1  292.26    5.80 
  -1   2  -1  307.80    5.81 
   1   2   1  296.21    5.65 
  -1  -2   1  303.20    5.77 
   1  -2  -1  298.33    5.70 
   1  -2  -1  295.44    5.77 
   1   2   1  294.61    5.80 
  -1  -2   1  300.11    5.76 
  -2   2   1   86.22    1.84 
  -2  -2  -1   87.02    1.97 
   2  -2   1   87.51    1.95 
   2   2  -1   88.01    1.95 
  -2  -2  -1   84.55    1.84 
  -2   2   1   83.22    1.96 
   2  -2   1   86.23    1.81 
   2  -2  -1   88.10    1.99 
  -2  -2   1   87.99    1.99 
   2  -2  -1   90.01    1.78 
  -2   2  -1   86.45    2.00 
  -2  -2   1   86.88    1.93 
  -2   2  -1   89.39    1.82 
   2   2   1   88.76    2.00 
   2   2   1   87.14    1.76 
  -3  -2  -1   25.85    0.65 
   3   2  -1   25.09    0.86 
  -3  -2  -1   25.92    0.79 
   3  -2   1   25.99    0.87 
  -3  -2  -1   24.63    0.88 
  -3   2   1   24.88    0.78 
   3  -2   1   25.31    0.72 
  -3   2   1   25.56    0.89 
   3  -2  -1   26.64    0.90 
  -3   2  -1   26.33    0.75 
   3   2   1   25.87    0.88 
  -3  -2   1   26.30    0.58 
  -3  -2   1   25.55    0.82 
  -3   2  -1   25.05    0.87 
  -3  -2   1   24.90    0.88 
   3  -2  -1   26.64    0.67 
  -4  -2  -1    7.62    0.34 
   4  -2   1    6.84    0.37 
  -4   2   1    6.99    0.44 
   4   2  -1    7.40    0.46 
  -4   2   1    6.79    0.51 
  -4  -2  -1    7.00    0.52 
   4   2  -1    7.03    0.51 
   4  -2   1    7.29    0.52 
   4   2   1    8.12    0.54 
  -4   2  -1    7.12    0.51 
  -4  -2   1    7.54    0.54 
   4  -2  -1    6.65    0.51 
   4   2   1    7.69    0.44 
  -4   2  -1    8.43    0.45 
   4  -2  -1    7.68    0.34 
  -4  -2   1    7.85    0.31 
  -5  -2  -1    5.96    0.55 
  -5   2   1    3.65    0.46 
   5  -2   1    4.56    0.53 
  -5   2   1    4.41    0.44 
   5  -2   1    5.40    0.36 
   5   2  -1    5.09    0.45 
  -5  -2  -1    4.51    0.34 
   5   2  -1    4.92    0.50 
   5   2   1    4.81    0.43 
  -5   2  -1    4.43    0.52 
  -5  -2   1    4.12    0.50 
  -5   2  -1    4.63    0.42 
   5  -2  -1    4.14    0.51 
   5   2   1    5.24    0.52 
   6   2  -1   33.32    1.25 
  -6  -2  -1   35.76    1.35 
  -6   2   1   32.98    1.26 
   6  -2   1   30.40    1.27 
  -6   2   1   32.82    1.20 
   6   2  -1   34.35    1.24 
   6   2   1   35.30    1.28 
  -6   2  -1   32.78    1.17 
   6   2   1   35.33    1.24 
  -6  -2   1   32.10    1.31 
  -6   2  -1   33.77    1.29 
   6  -2  -1   31.09    1.28 
   7   2  -1   11.33    0.79 
  -7  -2  -1   11.58    0.85 
  -7   2   1   11.39    0.77 
   7  -2   1   11.83    0.85 
   7   2  -1   11.29    0.77 
  -7   2   1   13.00    0.83 
   7   2   1   12.07    0.77 
  -7   2  -1   11.41    0.81 
   7  -2  -1   11.72    0.85 
  -7   2  -1   11.23    0.73 
  -7  -2   1   11.69    0.84 
   7   2   1   11.15    0.77 
   8   2  -1    9.07    0.79 
   8  -2   1    8.61    0.84 
  -8   2   1    8.30    0.75 
  -8  -2  -1   10.21    0.85 
  -8   2   1    7.71    0.75 
  -8   2  -1    9.36    0.83 
   8   2   1   10.87    0.82 
  -8  -2   1    8.80    0.82 
   8  -2  -1    8.91    0.85 
   8   2   1   10.68    0.81 
   9  -2   1    0.86    0.43 
  -9  -2  -1    1.23    0.48 
   9   2  -1    0.85    0.41 
   9  -2  -1    0.52    0.41 
  -9  -2   1    0.76    0.40 
   9   2   1    1.24    0.44 
  10  -2   1    3.45    0.71 
   0  -3  -1   42.19    1.09 
   0  -3  -1   41.68    1.07 
   0  -3   1   44.15    1.04 
   0   3   1   43.12    1.10 
   0   3   1   42.20    1.09 
   0  -3   1   41.90    1.11 
   0   3  -1   44.11    1.09 
   0   3  -1   42.16    1.11 
   1  -3   1   32.76    0.99 
  -1   3   1   35.91    0.91 
  -1   3   1   35.80    1.02 
   1   3  -1   34.78    1.01 
   1   3  -1   36.43    0.85 
   1  -3   1   35.11    0.84 
  -1  -3  -1   34.77    0.98 
  -1  -3  -1   33.08    0.92 
   1  -3  -1   36.20    0.92 
  -1  -3   1   35.32    0.97 
   1   3   1   36.39    0.89 
  -1   3  -1   34.32    1.00 
  -1   3  -1   35.63    0.95 
  -1  -3   1   34.63    0.96 
   1  -3  -1   35.42    1.00 
   1   3   1   34.29    0.99 
   2  -3   1   41.85    1.18 
   2  -3   1   41.60    0.99 
   2  -3   1   41.78    1.05 
   2   3  -1   39.65    1.17 
  -2  -3  -1   39.81    1.07 
  -2   3   1   41.49    1.00 
  -2   3   1   42.22    1.22 
  -2  -3  -1   42.07    1.19 
   2   3  -1   42.56    0.88 
   2  -3  -1   40.67    1.15 
   2  -3  -1   40.46    1.04 
  -2   3  -1   39.76    1.18 
  -2  -3   1   41.02    1.11 
  -2  -3   1   41.13    1.16 
   2   3   1   40.46    1.18 
   2   3   1   41.57    0.94 
  -3  -3  -1   50.95    1.45 
  -3   3   1   50.37    1.47 
   3  -3   1   49.34    1.42 
   3   3  -1   48.33    1.42 
  -3  -3  -1   53.43    1.12 
  -3  -3  -1   48.80    1.30 
   3  -3   1   50.68    1.24 
  -3   3   1   50.43    1.29 
  -3   3  -1   51.06    1.46 
   3   3   1   48.88    1.43 
  -3  -3   1   49.88    1.42 
   3  -3  -1   48.07    1.41 
  -3   3  -1   49.94    1.21 
  -3  -3   1   48.67    1.33 
   3  -3  -1   50.61    1.16 
  -4   3   1   30.28    0.96 
   4   3  -1   29.07    1.09 
  -4  -3  -1   28.03    1.09 
  -4   3   1   30.46    1.13 
  -4  -3  -1   31.42    1.00 
   4  -3   1   30.19    1.11 
  -4  -3  -1   30.28    0.75 
   4  -3   1   31.10    0.89 
  -4  -3   1   31.03    1.12 
   4  -3  -1   30.25    1.11 
  -4   3  -1   29.70    0.91 
  -4   3  -1   29.42    1.11 
   4  -3  -1   31.67    0.82 
   4   3   1   30.43    1.11 
  -4  -3   1   29.32    1.01 
   5   3  -1   19.38    0.93 
   5  -3   1   18.87    0.93 
  -5  -3  -1   19.93    0.96 
  -5   3   1   19.48    0.81 
   5   3  -1   20.14    0.87 
  -5   3   1   19.40    0.96 
  -5   3  -1   20.11    0.79 
  -5   3  -1   18.20    0.95 
  -5  -3   1   19.89    0.97 
   5   3   1   18.13    0.93 
   5   3   1   20.33    0.84 
   5  -3  -1   20.80    0.98 
  -6   3   1    9.52    0.74 
   6  -3   1   10.57    0.77 
   6   3  -1    8.93    0.66 
  -6   3   1    8.56    0.61 
  -6  -3  -1    9.72    0.78 
   6   3  -1   10.36    0.75 
  -6   3  -1    9.69    0.77 
  -6  -3   1    9.42    0.75 
   6   3   1    9.59    0.74 
   6  -3  -1   10.49    0.78 
   6   3   1    8.29    0.62 
  -6   3  -1   10.38    0.74 
   7   3  -1   19.03    1.04 
   7   3  -1   18.87    0.98 
   7  -3   1   18.43    1.05 
  -7  -3  -1   16.82    1.05 
  -7   3   1   20.33    1.10 
   7  -3  -1   17.65    1.07 
  -7   3  -1   20.58    1.12 
   7   3   1   19.53    0.98 
   7   3   1   18.75    1.04 
  -7  -3   1   19.44    1.10 
   8   3  -1    0.10    0.29 
   8  -3   1    0.66    0.38 
   8   3  -1    0.55    0.38 
  -8  -3  -1    0.99    0.41 
  -8   3   1    0.46    0.36 
   8   3   1    0.61    0.38 
  -8   3  -1    0.49    0.39 
   8   3   1    0.35    0.32 
  -8  -3   1   -0.07    0.30 
   8  -3  -1   -0.20    0.32 
   9  -3   1    4.98    0.78 
   9   3  -1    3.03    0.60 
  -9   3   1    3.70    0.67 
  -9  -3  -1    3.32    0.67 
   9  -3  -1    3.31    0.68 
  -9  -3   1    4.89    0.77 
  -9   3  -1    5.68    0.80 
   0  -4   1   13.64    0.53 
   0  -4   1   13.59    0.60 
   0   4   1   14.37    0.59 
   0   4  -1   13.12    0.57 
   0   4  -1   13.07    0.59 
   0  -4  -1   13.64    0.58 
   0  -4  -1   13.49    0.57 
   0   4   1   12.72    0.57 
   1  -4   1   52.66    1.47 
  -1  -4  -1   55.45    1.45 
   1   4  -1   55.31    1.31 
  -1  -4  -1   54.94    1.40 
  -1   4   1   55.70    1.49 
  -1   4   1   54.78    1.38 
   1   4  -1   52.29    1.46 
   1  -4   1   55.10    1.30 
  -1  -4   1   53.78    1.43 
  -1   4  -1   54.36    1.40 
  -1   4  -1   54.53    1.47 
   1   4   1   54.51    1.34 
  -1  -4   1   54.28    1.41 
   1  -4  -1   55.79    1.36 
   1  -4  -1   52.92    1.44 
   1   4   1   53.63    1.47 
   2   4  -1  108.04    2.20 
   2  -4   1  109.44    2.28 
  -2   4   1  107.02    2.58 
  -2  -4  -1  109.15    2.55 
  -2   4   1  109.16    2.35 
  -2  -4  -1  104.04    2.41 
   2  -4   1  108.28    2.56 
   2   4  -1  109.12    2.57 
  -2   4  -1  108.78    2.59 
   2   4   1  110.10    2.28 
   2  -4  -1  108.08    2.54 
  -2   4  -1  107.48    2.40 
   2  -4  -1  109.89    2.37 
   2   4   1  107.94    2.58 
  -2  -4   1  108.73    2.52 
  -2  -4   1  107.47    2.47 
   3  -4   1  102.02    2.16 
   3   4  -1   98.00    2.47 
   3  -4   1   99.25    2.44 
  -3   4   1   96.60    2.49 
  -3   4   1  100.14    2.15 
  -3  -4  -1   94.72    2.43 
  -3  -4  -1   95.65    2.27 
   3   4   1   96.86    2.47 
  -3   4  -1   99.69    2.21 
  -3  -4   1   95.23    2.32 
  -3   4  -1   98.32    2.48 
   3  -4  -1   97.09    2.41 
   3  -4  -1   99.03    2.22 
  -3  -4   1   99.61    2.44 
  -4   4   1   43.86    1.24 
   4   4  -1   40.10    1.42 
  -4  -4  -1   43.12    1.28 
  -4  -4  -1   41.04    1.43 
  -4   4   1   43.22    1.49 
   4  -4   1   44.14    1.17 
   4  -4   1   38.82    1.38 
  -4   4  -1   41.24    1.45 
  -4   4  -1   42.62    1.18 
   4   4   1   41.76    1.46 
   4  -4  -1   42.97    1.43 
  -4  -4   1   41.14    1.42 
  -4  -4   1   43.73    1.33 
  -5   4   1    2.79    0.48 
  -5  -4  -1    2.80    0.48 
   5   4  -1    2.28    0.46 
  -5   4   1    2.35    0.35 
   5  -4   1    2.63    0.45 
  -5  -4   1    3.11    0.43 
   5   4   1    2.68    0.38 
  -5   4  -1    2.67    0.48 
   5  -4  -1    2.31    0.44 
   5   4   1    2.55    0.45 
  -5  -4   1    2.63    0.47 
   6   4  -1    7.58    0.62 
   6  -4   1    7.12    0.71 
  -6   4   1    7.12    0.73 
  -6  -4  -1    7.07    0.70 
   6   4  -1    8.36    0.74 
  -6  -4   1    6.74    0.70 
   6   4   1    8.05    0.61 
  -6   4  -1    7.39    0.75 
   6   4   1    7.09    0.71 
   6  -4  -1    8.15    0.75 
   7   4  -1   -0.02    0.35 
   7  -4   1    0.58    0.36 
  -7   4   1   -0.31    0.31 
   7   4  -1    0.33    0.27 
  -7  -4  -1    0.14    0.34 
   7  -4  -1    0.35    0.37 
   7   4   1    0.42    0.29 
  -7  -4   1    0.45    0.33 
  -7   4  -1    0.41    0.36 
   7   4   1    0.24    0.34 
  -8  -4  -1    3.81    0.68 
  -8   4   1    4.28    0.70 
   8   4  -1    5.07    0.66 
   8   4  -1    4.57    0.69 
   8  -4   1    4.65    0.72 
   8   4   1    4.30    0.70 
  -8   4  -1    5.10    0.76 
  -8  -4   1    3.80    0.67 
   8  -4  -1    3.97    0.69 
  -9   4   1    4.42    0.77 
  -9  -4  -1    3.20    0.66 
   9  -4   1    2.37    0.61 
  -9   4  -1    3.43    0.72 
   9   4   1    3.90    0.70 
  -9  -4   1    4.23    0.79 
   9  -4  -1    4.26    0.78 
   0   5   1    0.27    0.20 
   0  -5   1    0.08    0.17 
   0   5  -1    0.17    0.20 
   0   5  -1    0.31    0.21 
   0  -5  -1    0.03    0.17 
   0   5   1    0.09    0.17 
   0  -5  -1    0.17    0.17 
   0  -5   1    0.21    0.17 
   1  -5   1    0.91    0.21 
   1   5  -1    0.65    0.26 
  -1   5   1    1.01    0.24 
   1  -5   1    0.92    0.27 
  -1   5   1    0.81    0.26 
  -1  -5  -1    0.58    0.24 
   1   5  -1    0.79    0.22 
  -1  -5  -1    0.45    0.20 
  -1  -5   1    0.79    0.23 
   1   5   1    0.83    0.22 
  -1   5  -1    1.15    0.26 
   1   5   1    1.01    0.29 
  -1  -5   1    1.25    0.26 
   1  -5  -1    0.70    0.25 
  -1   5  -1    0.36    0.25 
   1  -5  -1    0.98    0.23 
  -2  -5  -1    8.36    0.59 
  -2   5   1    8.94    0.50 
  -2   5   1    7.66    0.61 
   2   5  -1    9.11    0.65 
   2  -5   1    9.77    0.46 
  -2  -5  -1    9.05    0.54 
   2  -5   1    9.37    0.62 
  -2  -5   1    9.72    0.60 
   2   5   1   10.11    0.68 
   2  -5  -1   10.19    0.63 
   2  -5  -1    9.05    0.50 
   2   5   1   10.03    0.46 
  -2  -5   1    9.46    0.59 
  -2   5  -1    9.69    0.67 
  -2   5  -1    9.90    0.54 
   3   5  -1    0.82    0.36 
  -3  -5  -1    1.02    0.28 
   3  -5   1    1.26    0.34 
  -3  -5  -1    1.11    0.32 
  -3   5   1    1.58    0.38 
  -3   5   1    1.18    0.24 
  -3   5  -1    1.24    0.40 
  -3   5  -1    1.67    0.27 
  -3  -5   1    1.14    0.31 
   3  -5  -1    0.72    0.30 
  -3  -5   1    1.23    0.30 
   3   5   1    0.93    0.32 
   3  -5  -1    1.94    0.29 
  -4  -5  -1    5.98    0.51 
  -4   5   1    5.08    0.63 
  -4  -5  -1    5.83    0.61 
   4  -5   1    5.29    0.59 
   4   5  -1    5.92    0.68 
   4  -5  -1    5.72    0.61 
  -4  -5   1    6.07    0.52 
   4   5   1    6.77    0.63 
  -4   5  -1    5.18    0.64 
  -4  -5   1    7.60    0.64 
   5  -5   1    3.91    0.56 
  -5   5   1    3.83    0.56 
  -5  -5  -1    4.91    0.50 
  -5  -5  -1    4.39    0.59 
   5   5  -1    4.08    0.59 
   5  -5  -1    3.85    0.57 
  -5   5  -1    3.96    0.58 
   5   5   1    4.64    0.64 
  -5  -5   1    3.87    0.47 
  -5  -5   1    4.88    0.63 
   6   5  -1    1.15    0.34 
   6   5  -1    1.49    0.48 
  -6  -5  -1    0.75    0.36 
   6  -5   1    0.94    0.40 
  -6   5   1    0.54    0.36 
  -6  -5   1    0.64    0.36 
  -6   5  -1    2.00    0.51 
   6  -5  -1    1.20    0.41 
   6   5   1    2.05    0.52 
   6   5   1    0.81    0.28 
  -7  -5  -1    0.26    0.32 
  -7   5   1    0.62    0.41 
   7   5  -1   -0.59    0.34 
   7   5  -1    0.06    0.25 
   7  -5   1    0.05    0.33 
   7  -5  -1    0.36    0.36 
  -7  -5   1    0.10    0.31 
  -7   5  -1   -0.50    0.31 
   7   5   1    0.69    0.40 
   8   5  -1    0.04    0.41 
   8  -5   1    0.32    0.38 
  -8  -5  -1   -0.15    0.37 
  -8   5   1   -0.08    0.40 
  -8  -5   1    0.66    0.41 
  -8   5  -1    0.06    0.41 
   8  -5  -1   -0.08    0.34 
   8   5   1    0.27    0.45 
   9   5  -1    4.88    0.82 
   9   5   1    7.00    0.92 
   0   6   1    2.64    0.39 
   0  -6  -1    3.30    0.44 
   0  -6   1    2.34    0.33 
   0  -6   1    2.63    0.41 
   0   6  -1    1.94    0.35 
   0   6  -1    2.57    0.41 
   0   6   1    2.10    0.36 
   0  -6  -1    2.33    0.36 
  -1  -6  -1    5.97    0.50 
   1  -6   1    6.15    0.55 
   1  -6   1    5.95    0.45 
   1   6  -1    5.47    0.44 
  -1  -6  -1    5.38    0.52 
  -1   6   1    6.27    0.56 
  -1   6   1    6.05    0.50 
   1   6  -1    4.68    0.53 
   1   6   1    6.23    0.57 
   1   6   1    5.94    0.47 
   1  -6  -1    6.76    0.56 
  -1   6  -1    5.86    0.51 
  -1   6  -1    6.44    0.57 
  -1  -6   1    5.90    0.50 
   1  -6  -1    6.79    0.51 
  -1  -6   1    6.15    0.53 
  -2  -6  -1   10.25    0.63 
  -2   6   1   11.53    0.63 
  -2  -6  -1    9.75    0.69 
   2  -6   1   10.14    0.70 
   2   6  -1    9.15    0.72 
  -2   6   1    9.53    0.72 
   2  -6  -1   10.55    0.59 
   2  -6  -1   10.14    0.69 
  -2  -6   1   10.29    0.67 
  -2   6  -1   10.38    0.62 
  -2  -6   1    9.45    0.65 
  -2   6  -1    9.38    0.71 
   2   6   1    9.22    0.73 
   3   6  -1    6.28    0.69 
  -3  -6  -1    6.68    0.64 
   3  -6   1    5.88    0.60 
  -3  -6  -1    6.95    0.54 
  -3   6   1    6.10    0.66 
  -3   6  -1    7.15    0.66 
  -3  -6   1    6.34    0.55 
  -3   6  -1    6.76    0.50 
   3   6   1    6.72    0.68 
   3  -6  -1    6.11    0.61 
  -3  -6   1    7.12    0.62 
   4  -6   1   72.38    2.22 
  -4  -6  -1   75.02    2.05 
  -4  -6  -1   71.10    2.21 
  -4   6   1   71.39    2.26 
   4   6  -1   74.72    2.28 
   4   6   1   77.73    2.33 
  -4   6  -1   74.31    2.30 
  -4  -6   1   73.87    2.10 
  -4  -6   1   74.77    2.23 
   4  -6  -1   73.30    2.24 
  -5  -6  -1    2.09    0.46 
   5  -6   1    1.90    0.47 
   5   6  -1    1.49    0.45 
  -5  -6  -1    2.41    0.46 
  -5   6   1    2.57    0.54 
   5   6   1    2.31    0.55 
  -5   6  -1    1.72    0.49 
  -5  -6   1    2.68    0.44 
  -5  -6   1    2.57    0.49 
   5  -6  -1    2.32    0.50 
  -6  -6  -1   23.86    1.28 
   6  -6   1   21.81    1.24 
   6   6  -1   23.44    1.31 
  -6   6   1   23.75    1.32 
  -6  -6   1   22.44    1.13 
  -6   6  -1   22.94    1.31 
   6  -6  -1   23.16    1.27 
   6   6   1   25.56    1.36 
  -6  -6   1   23.40    1.27 
   7  -6   1   -0.05    0.35 
  -7   6   1    0.23    0.37 
   7   6  -1   -0.26    0.38 
  -7  -6  -1    0.06    0.35 
  -7  -6   1    0.40    0.39 
   7   6   1    1.17    0.52 
  -7   6  -1    1.05    0.50 
   7  -6  -1   -0.56    0.36 
  -8   6   1    8.94    0.96 
   8   6  -1    5.67    0.88 
   8  -6   1    5.40    1.02 
  -8   6  -1    6.80    0.93 
  -8  -6   1    7.58    1.39 
   8   6   1    7.08    0.96 
   0   7  -1    0.44    0.27 
   0  -7  -1    0.21    0.24 
   0  -7   1    0.65    0.30 
   0   7   1    0.63    0.28 
   0   7   1    0.25    0.27 
   0   7  -1    0.47    0.28 
   0  -7  -1    0.40    0.27 
  -1   7   1    5.77    0.59 
  -1  -7  -1    6.97    0.59 
   1   7  -1    6.91    0.65 
   1  -7   1    6.29    0.61 
  -1  -7  -1    5.98    0.58 
  -1   7   1    5.65    0.57 
  -1   7  -1    6.30    0.57 
  -1   7  -1    7.67    0.63 
  -1  -7   1    6.75    0.57 
   1  -7  -1    6.90    0.62 
  -1  -7   1    6.15    0.59 
   1   7   1    6.07    0.65 
  -2  -7  -1    6.08    0.61 
   2   7  -1    6.40    0.67 
  -2   7   1    4.47    0.58 
  -2   7   1    4.94    0.50 
  -2  -7  -1    5.11    0.53 
   2  -7   1    5.68    0.60 
  -2  -7   1    4.74    0.55 
   2  -7  -1    5.08    0.57 
   2   7   1    4.16    0.59 
  -2  -7   1    4.03    0.52 
  -2   7  -1    4.93    0.52 
  -2   7  -1    4.38    0.61 
   3   7  -1   31.71    1.41 
  -3   7   1   33.13    1.44 
   3  -7   1   33.44    1.40 
  -3  -7  -1   33.36    1.37 
  -3  -7  -1   33.09    1.27 
  -3   7  -1   33.02    1.43 
  -3  -7   1   32.81    1.35 
   3  -7  -1   34.85    1.41 
  -3  -7   1   34.20    1.32 
   3   7   1   32.97    1.44 
  -4  -7  -1    9.87    0.80 
   4  -7   1    8.19    0.78 
  -4   7   1   10.38    0.90 
  -4  -7  -1    8.78    0.76 
   4   7  -1    8.70    0.80 
  -4  -7   1    8.04    0.68 
  -4   7  -1    7.96    0.82 
  -4  -7   1    7.18    0.70 
   4   7   1    8.03    0.81 
   4  -7  -1    8.46    0.76 
  -5   7   1   10.19    0.96 
   5   7  -1    7.78    0.81 
   5  -7   1    8.13    0.80 
  -5  -7  -1    9.43    0.85 
  -5  -7   1    7.34    0.75 
  -5  -7   1    7.98    0.69 
   5  -7  -1    6.07    0.74 
   5   7   1    8.22    0.85 
  -5   7  -1    8.52    0.88 
   6  -7   1   20.53    1.26 
   6   7  -1   20.05    1.28 
  -6  -7  -1   18.28    1.19 
  -6   7   1   18.85    1.25 
  -6   7  -1   18.46    1.25 
  -6  -7   1   20.06    1.26 
   6  -7  -1   20.69    1.28 
   6   7   1   17.51    1.24 
   7   7  -1    5.59    0.86 
   7  -7   1    5.72    0.85 
  -7   7   1    6.12    0.90 
  -7  -7  -1    7.20    0.93 
   7   7   1    7.11    0.97 
   7  -7  -1    4.81    0.77 
  -7   7  -1    5.23    0.83 
  -7  -7   1    7.45    0.88 
   0   8  -1   20.04    1.07 
   0   8   1   22.82    1.12 
   0  -8  -1   20.73    1.07 
   0  -8   1   21.79    1.11 
  -1   8   1    1.46    0.41 
   1   8  -1    0.93    0.39 
  -1  -8  -1    1.22    0.39 
  -1   8   1    1.25    0.36 
   1  -8   1    1.01    0.35 
  -1   8  -1    1.08    0.37 
  -1   8  -1    1.19    0.38 
  -1  -8   1    0.84    0.36 
   1  -8  -1    1.49    0.40 
   1   8   1    1.12    0.40 
  -2  -8  -1    5.33    0.65 
   2   8  -1    7.11    0.79 
  -2  -8  -1    6.30    0.63 
  -2   8   1    6.09    0.69 
   2  -8   1    7.74    0.73 
   2  -8  -1    5.57    0.68 
  -2   8  -1    5.37    0.68 
  -2  -8   1    7.41    0.69 
   2   8   1    6.42    0.73 
  -2  -8   1    8.47    1.15 
   3  -8   1   10.59    0.89 
  -3  -8  -1    9.26    1.13 
  -3   8   1   10.21    0.88 
  -3  -8  -1   12.14    0.90 
   3   8  -1   10.51    0.91 
   3   8   1   11.91    0.96 
  -3  -8   1    7.83    0.76 
  -3  -8   1   10.63    0.81 
   3  -8  -1    9.93    0.83 
  -3   8  -1   10.14    0.87 
  -4   8   1   19.74    1.23 
   4   8  -1   20.85    1.27 
   4  -8   1   21.58    1.23 
  -4  -8  -1   21.57    1.21 
  -4  -8   1   20.76    1.10 
   4  -8  -1   18.06    1.13 
  -4   8  -1   18.68    1.23 
   4   8   1   18.63    1.21 
  -4  -8   1   19.12    1.13 
   5   8  -1   -0.05    0.38 
  -5   8   1    0.17    0.40 
   5  -8   1    0.46    0.38 
  -5  -8  -1    0.06    0.36 
  -5  -8   1   -0.05    0.32 
   5   8   1    1.57    0.54 
   5  -8  -1    0.42    0.37 
  -5   8  -1    0.39    0.41 
   6   8  -1    6.01    0.92 
  -6  -8  -1    4.52    0.75 
  -6   8   1    5.80    0.89 
   6  -8   1    6.06    0.90 
   6   8   1    5.41    0.93 
  -6   8  -1    5.61    0.90 
  -6  -8   1    5.42    0.80 
   6  -8  -1    5.09    0.78 
   0   9  -1   20.92    1.19 
   0  -9  -1   19.27    1.11 
   0  -9   1   20.59    1.16 
   0   9   1   19.36    1.13 
   1   9  -1    4.61    0.70 
   1  -9   1    5.03    0.69 
  -1  -9  -1    5.17    0.69 
   1  -9  -1    4.72    0.67 
  -1  -9   1    4.19    0.66 
  -1   9  -1    3.83    0.60 
   1   9   1    5.06    0.71 
   2  -9   1    9.66    0.86 
   2   9  -1    8.66    0.88 
  -2   9   1   10.04    0.90 
  -2  -9   1    9.45    0.85 
   2  -9  -1    9.26    0.85 
   2   9   1    7.91    0.89 
  -2   9  -1    9.57    0.87 
   3  -9   1    3.90    0.64 
   3   9  -1    2.88    0.62 
  -3   9   1    2.93    0.61 
   3   9   1    4.13    0.73 
  -3  -9   1    3.10    0.66 
  -3   9  -1    3.16    0.61 
   3  -9  -1    2.92    0.60 
  -4  -9  -1    3.12    0.62 
   4   9  -1    2.50    0.67 
  -4   9   1    3.41    0.69 
   4  -9   1    2.00    0.57 
  -4   9  -1    3.26    0.66 
   4   9   1    3.04    0.70 
   4  -9  -1    3.79    0.70 
  -5  -9  -1    1.74    0.56 
  -5  -9   1    2.55    0.62 
   0  10  -1    0.16    0.40 
   0 -10  -1    0.25    0.40 
   0 -10   1   -0.17    0.42 
   1  10  -1    8.19    0.97 
   1 -10   1   10.99    1.00 
  -1 -10   1   12.07    1.06 
   1  10   1   11.96    1.04 
   1 -10  -1   10.23    0.96 
   2 -10   1   -0.49    0.34 
   2  10  -1    0.20    0.44 
   2  10   1    0.14    0.41 
   2 -10  -1   -0.01    0.39 
  -3  10   1    3.62    0.76 
  -3  10  -1    3.32    0.67 
   0   0   2   37.50    0.79 
   0   0   2   39.21    0.77 
   0   0   2   38.56    0.80 
   0   0   2   39.18    0.79 
   1   0   2    7.39    0.27 
  -1   0  -2    7.58    0.25 
  -1   0  -2    7.38    0.27 
  -1   0   2    7.01    0.24 
   1   0   2    7.58    0.23 
   1   0  -2    7.40    0.21 
  -1   0   2    7.09    0.27 
  -2   0  -2    4.73    0.28 
   2   0  -2    4.88    0.24 
  -2   0   2    5.00    0.30 
   2   0   2    4.79    0.29 
   2   0   2    5.43    0.28 
  -2   0  -2    5.30    0.28 
  -2   0   2    4.64    0.26 
  -3   0  -2   16.37    0.59 
   3   0   2   17.62    0.60 
  -3   0  -2   16.23    0.60 
  -3   0   2   16.02    0.55 
  -3   0   2   16.81    0.63 
   3   0  -2   16.54    0.53 
   3   0  -2   16.95    0.63 
   3   0   2   16.20    0.58 
  -4   0  -2  141.36    3.00 
   4   0   2  137.21    3.02 
  -4   0  -2  136.22    3.03 
   4   0  -2  142.70    2.92 
   4   0   2  137.88    2.98 
   4   0  -2  141.20    3.09 
  -4   0   2  136.70    3.09 
  -4   0   2  141.67    2.96 
  -5   0   2   14.77    0.64 
   5   0   2   14.03    0.68 
  -5   0   2   12.92    0.70 
  -5   0  -2   14.14    0.66 
   5   0  -2   14.30    0.61 
  -5   0  -2   14.83    0.72 
   5   0   2   13.53    0.64 
   5   0  -2   13.01    0.70 
  -6   0   2    2.40    0.44 
  -6   0  -2    3.16    0.42 
  -6   0   2    3.41    0.42 
   6   0  -2    2.98    0.46 
   6   0  -2    3.53    0.40 
   6   0   2    2.43    0.42 
   6   0   2    2.44    0.37 
  -6   0  -2    3.15    0.44 
  -7   0  -2   50.03    1.68 
  -7   0  -2   50.63    1.59 
   7   0   2   49.60    1.68 
  -7   0   2   53.19    1.76 
   7   0  -2   49.84    1.73 
   7   0   2   50.13    1.58 
  -8   0  -2    8.82    0.77 
   8   0  -2   10.09    0.84 
   8   0   2    9.15    0.79 
  -8   0   2    7.43    0.73 
  -9   0  -2    2.15    0.53 
   9   0  -2    1.10    0.46 
  -9   0   2    0.77    0.43 
   9   0   2    1.26    0.48 
 -10   0   2    0.27    0.42 
  10   0   2    0.11    0.48 
  10   0  -2    0.31    0.46 
   0   1   2  105.43    2.07 
   0  -1  -2  105.45    2.01 
   0  -1   2  103.82    2.07 
   0   1   2  103.66    2.04 
   0  -1   2  104.55    2.07 
   0  -1   2  106.03    1.99 
   0   1  -2  104.04    2.04 
   0  -1  -2  101.60    2.07 
   1   1  -2  179.08    3.52 
  -1   1   2  180.70    3.37 
   1  -1   2  181.79    3.53 
   1  -1   2  181.84    3.51 
  -1  -1  -2  185.77    3.44 
  -1   1   2  177.01    3.52 
   1   1  -2  182.56    3.37 
  -1   1   2  184.71    3.56 
   1   1   2  179.53    3.45 
   1  -1  -2  182.87    3.51 
  -1  -1   2  183.42    3.51 
  -1   1  -2  179.36    3.53 
  -1  -1   2  179.77    3.51 
  -1   1  -2  180.31    3.37 
   1   1   2  176.92    3.53 
  -2  -1  -2   96.78    1.98 
   2  -1   2   98.70    2.01 
   2  -1   2   98.18    2.07 
  -2   1   2   94.86    2.08 
  -2   1   2   98.21    2.06 
  -2  -1  -2   93.98    2.09 
   2   1  -2   98.36    2.05 
  -2   1  -2   96.57    1.97 
  -2  -1   2   95.53    2.10 
   2   1   2   97.82    2.10 
  -2   1  -2   95.35    2.09 
   2   1   2   97.79    1.99 
   2  -1  -2   99.88    1.87 
  -2  -1   2   97.50    1.88 
   2  -1  -2   96.33    2.09 
  -2  -1   2   97.20    2.07 
  -3   1   2   47.19    1.24 
  -3   1   2   46.06    1.23 
  -3  -1  -2   48.40    1.14 
  -3  -1  -2   49.03    1.29 
   3  -1   2   48.38    1.17 
   3  -1   2   48.54    1.25 
   3   1  -2   47.60    1.24 
   3   1  -2   49.21    1.22 
  -3  -1   2   48.51    1.29 
  -3   1  -2   46.73    1.26 
  -3   1  -2   47.93    1.18 
   3   1   2   46.79    1.25 
   3  -1  -2   49.25    1.06 
   3   1   2   50.25    1.19 
   3  -1  -2   46.93    1.26 
  -3  -1   2   49.43    1.07 
  -4  -1  -2   24.22    0.76 
  -4   1   2   23.64    0.84 
   4  -1   2   23.04    0.85 
   4   1  -2   23.46    0.85 
   4   1  -2   23.91    0.82 
  -4   1   2   24.46    0.85 
   4  -1   2   24.77    0.78 
  -4  -1  -2   22.62    0.87 
  -4   1  -2   23.86    0.86 
   4   1   2   22.84    0.84 
  -4  -1   2   24.16    0.69 
  -4  -1   2   22.56    0.87 
  -4   1  -2   23.81    0.80 
   4  -1  -2   24.36    0.68 
   4   1   2   24.47    0.81 
   4  -1  -2   22.84    0.86 
   5   1  -2   11.88    0.63 
  -5  -1  -2   13.36    0.72 
  -5  -1  -2   12.28    0.58 
  -5   1   2   12.04    0.65 
  -5   1   2   11.79    0.65 
   5  -1   2   13.80    0.61 
   5   1  -2   11.96    0.67 
   5  -1   2   12.37    0.69 
   5   1   2   11.99    0.65 
  -5   1  -2   11.20    0.61 
  -5   1  -2   12.62    0.67 
   5  -1  -2   13.37    0.53 
   5   1   2   11.52    0.62 
  -5  -1   2   13.46    0.54 
  -5  -1   2   12.28    0.70 
   5  -1  -2   11.76    0.68 
  -6  -1  -2   10.90    0.63 
   6  -1   2   12.33    0.77 
  -6   1   2   11.88    0.71 
   6   1  -2   11.94    0.76 
  -6  -1  -2   11.35    0.75 
  -6   1   2   11.61    0.71 
   6  -1   2   11.47    0.62 
   6   1  -2   11.91    0.68 
  -6   1  -2   11.32    0.71 
  -6   1  -2   11.18    0.67 
   6  -1  -2   12.58    0.79 
   6   1   2   11.42    0.68 
   6   1   2   11.97    0.70 
  -6  -1   2   11.62    0.75 
  -7   1   2    4.33    0.56 
   7   1  -2    4.60    0.60 
   7  -1   2    4.87    0.58 
  -7   1   2    4.57    0.55 
  -7  -1  -2    3.61    0.53 
   7   1   2    5.30    0.55 
  -7   1  -2    4.52    0.56 
   7   1   2    4.70    0.57 
   7  -1  -2    5.58    0.69 
  -7  -1   2    4.62    0.61 
  -7   1  -2    5.21    0.55 
   8  -1   2    4.68    0.65 
  -8   1   2    4.89    0.64 
  -8  -1  -2    4.36    0.62 
   8   1  -2    6.18    0.72 
  -8  -1   2    5.60    0.74 
   8  -1  -2    4.27    0.62 
  -8   1  -2    4.13    0.58 
   8   1   2    5.71    0.64 
  -8   1  -2    5.02    0.62 
  -9  -1  -2    3.27    0.64 
  -9   1   2    2.85    0.59 
   9   1  -2    3.43    0.61 
   9  -1   2    3.50    0.65 
  -9  -1   2    3.00    0.61 
   9  -1  -2    2.23    0.56 
   9   1   2    1.30    0.48 
 -10  -1  -2   14.73    1.18 
  10   1  -2   15.25    1.18 
  10  -1   2   14.64    1.16 
 -10   1   2   11.08    1.32 
  10  -1  -2   13.25    1.13 
 -10  -1   2   13.27    1.20 
   0  -2  -2  674.55   12.54 
   0  -2  -2  663.25   12.58 
   0   2  -2  673.06   12.60 
   0  -2   2  666.12   12.76 
   0   2   2  677.15   12.55 
   0   2   2  665.68   12.58 
   0   2  -2  691.59   12.55 
   0  -2   2  666.41   12.60 
  -1  -2  -2  216.40    4.16 
  -1   2   2  216.41    4.12 
  -1  -2  -2  215.37    4.28 
   1   2  -2  220.76    4.07 
   1  -2   2  212.75    4.27 
  -1   2   2  215.84    4.30 
   1  -2   2  219.35    4.06 
   1  -2   2  217.81    4.22 
   1   2  -2  208.63    4.26 
   1   2   2  217.01    4.28 
   1  -2  -2  211.68    4.24 
  -1  -2   2  219.28    4.23 
  -1   2  -2  211.53    4.27 
  -1  -2   2  215.66    4.25 
   1  -2  -2  217.32    4.21 
   1   2   2  218.36    4.16 
   2  -2   2    7.41    0.34 
  -2   2   2    8.75    0.46 
  -2   2   2    8.11    0.38 
  -2  -2  -2    8.48    0.46 
  -2  -2  -2    8.49    0.35 
  -2   2   2    8.56    0.27 
   2   2  -2    8.79    0.44 
  -2  -2   2    8.42    0.44 
   2   2   2    8.18    0.46 
  -2   2  -2    8.36    0.46 
  -2   2  -2    9.31    0.31 
  -2  -2   2    8.83    0.42 
   2   2   2    8.16    0.32 
   2  -2  -2    8.57    0.45 
   3  -2   2   58.41    1.51 
  -3  -2  -2   57.27    1.54 
  -3   2   2   57.15    1.53 
   3   2  -2   57.65    1.49 
  -3   2   2   57.83    1.45 
  -3  -2  -2   60.06    1.30 
   3  -2   2   59.31    1.38 
  -3  -2   2   56.60    1.45 
  -3   2  -2   58.47    1.33 
   3   2   2   54.88    1.49 
  -3   2  -2   54.92    1.51 
   3  -2  -2   56.25    1.50 
  -3  -2   2   58.29    1.51 
   3   2   2   57.51    1.37 
   3  -2  -2   58.53    1.21 
  -4  -2  -2   36.29    1.19 
   4   2  -2   36.95    1.12 
  -4  -2  -2   36.79    0.95 
   4  -2   2   35.13    1.16 
   4  -2   2   36.76    1.00 
   4   2  -2   34.82    1.12 
  -4   2   2   35.64    1.17 
  -4   2   2   34.51    1.08 
   4  -2  -2   35.29    1.18 
  -4   2  -2   36.28    1.19 
   4   2   2   35.66    1.17 
  -4  -2   2   38.17    0.84 
  -4   2  -2   35.50    1.02 
   4  -2  -2   37.28    0.88 
   4   2   2   35.30    1.05 
  -4  -2   2   35.66    1.19 
   5   2  -2   27.98    1.06 
   5  -2   2   26.67    1.07 
   5  -2   2   28.94    0.91 
  -5  -2  -2   25.13    1.07 
   5   2  -2   27.41    1.02 
  -5   2   2   29.75    1.11 
  -5  -2  -2   29.35    0.87 
  -5   2   2   27.12    1.01 
  -5   2  -2   27.46    1.09 
   5   2   2   28.71    1.08 
  -5   2  -2   27.98    0.96 
  -5  -2   2   26.94    1.09 
   5   2   2   28.52    0.99 
   5  -2  -2   26.87    1.10 
   6   2  -2   11.45    0.73 
   6  -2   2   11.05    0.74 
  -6   2   2   10.54    0.68 
   6   2  -2    9.83    0.68 
  -6  -2  -2   10.35    0.76 
  -6   2   2   10.18    0.72 
  -6   2  -2   10.23    0.63 
   6  -2  -2    9.12    0.74 
   6   2   2   10.91    0.75 
   6   2   2   10.01    0.65 
  -6  -2   2   11.89    0.79 
  -6   2  -2    9.68    0.72 
  -7   2   2   15.79    0.87 
  -7   2   2   13.96    0.87 
  -7  -2  -2   16.09    0.98 
   7  -2   2   13.94    0.90 
   7   2  -2   17.60    0.95 
   7   2  -2   14.86    0.88 
   7   2   2   15.33    0.85 
   7  -2  -2   15.30    0.96 
   7   2   2   15.42    0.90 
  -7  -2   2   15.59    0.97 
  -7   2  -2   15.36    0.92 
  -7   2  -2   14.88    0.82 
  -8   2   2    3.05    0.52 
   8  -2   2    3.54    0.60 
  -8  -2  -2    2.62    0.53 
   8   2  -2    1.81    0.47 
  -8   2   2    1.89    0.45 
   8   2   2    2.48    0.49 
   8   2   2    3.58    0.57 
   8  -2  -2    3.30    0.60 
  -8  -2   2    2.67    0.55 
  -8   2  -2    2.26    0.51 
   9  -2   2    9.55    0.93 
  -9  -2  -2   11.20    0.98 
   9   2  -2   10.42    0.93 
  -9  -2   2   10.23    0.98 
   9  -2  -2   10.80    0.99 
  10   2  -2    3.51    0.68 
  10  -2   2    2.59    0.66 
   0  -3  -2  109.32    2.30 
   0  -3   2  107.23    2.35 
   0  -3   2  109.71    2.21 
   0   3   2  108.82    2.32 
   0   3  -2  103.49    2.33 
   0  -3  -2  105.76    2.31 
   0   3  -2  110.11    2.29 
   0   3   2  105.19    2.29 
  -1   3   2   80.47    1.93 
   1  -3   2   81.15    1.91 
   1   3  -2   84.95    1.74 
   1   3  -2   83.40    1.93 
  -1   3   2   82.78    1.79 
  -1  -3  -2   82.82    1.92 
  -1  -3  -2   83.82    1.82 
   1  -3   2   84.05    1.71 
  -1  -3   2   87.59    1.90 
  -1  -3   2   85.05    1.93 
   1  -3  -2   85.13    1.93 
   1   3   2   85.08    1.97 
   1  -3  -2   86.42    1.89 
   1   3   2   84.42    1.84 
  -1   3  -2   84.19    1.96 
  -1   3  -2   83.84    1.90 
   2   3  -2    1.45    0.25 
  -2   3   2    1.52    0.18 
  -2  -3  -2    1.65    0.27 
   2  -3   2    1.87    0.23 
   2  -3   2    1.37    0.24 
   2   3  -2    1.82    0.11 
   2  -3   2    1.65    0.16 
  -2   3   2    1.87    0.29 
  -2  -3  -2    1.84    0.23 
  -2  -3   2    1.49    0.24 
   2  -3  -2    1.91    0.28 
  -2   3  -2    1.63    0.27 
   2   3   2    1.45    0.25 
  -2  -3   2    1.32    0.21 
   2   3   2    1.75    0.18 
   2  -3  -2    1.67    0.22 
  -3  -3  -2   29.64    1.05 
  -3  -3  -2   31.96    0.92 
  -3   3   2   32.02    0.78 
   3  -3   2   30.88    1.03 
   3  -3   2   30.03    0.88 
   3   3  -2   30.04    1.03 
  -3   3   2   31.97    1.08 
  -3   3   2   30.95    0.94 
  -3   3  -2   32.08    0.83 
   3  -3  -2   29.16    1.01 
   3   3   2   31.50    0.78 
   3   3   2   30.70    1.06 
  -3  -3   2   30.81    0.99 
  -3   3  -2   29.84    1.05 
  -3  -3   2   29.32    1.02 
  -4  -3  -2    9.61    0.64 
  -4  -3  -2   10.20    0.40 
   4  -3   2   10.38    0.48 
  -4   3   2    9.75    0.53 
   4   3  -2    9.07    0.62 
   4  -3   2    9.96    0.63 
  -4   3   2    9.97    0.67 
  -4  -3   2    9.37    0.60 
   4   3   2   10.46    0.67 
  -4   3  -2   10.35    0.48 
  -4  -3   2   10.01    0.58 
   4   3   2    9.99    0.52 
   4  -3  -2   10.06    0.66 
  -4   3  -2   10.19    0.65 
   5  -3   2   26.14    1.11 
   5  -3   2   26.31    0.88 
  -5   3   2   27.01    1.13 
   5   3  -2   26.01    1.01 
   5   3  -2   26.92    1.09 
  -5  -3  -2   27.94    1.15 
  -5   3   2   26.02    0.98 
  -5   3  -2   26.22    1.15 
  -5  -3   2   26.87    1.13 
  -5   3  -2   27.31    0.93 
   5  -3  -2   26.86    1.13 
   5   3   2   26.82    1.12 
   5   3   2   27.76    0.98 
   6   3  -2    5.49    0.55 
  -6   3   2    4.07    0.50 
   6   3  -2    4.32    0.57 
  -6  -3  -2    4.60    0.63 
  -6   3   2    5.81    0.62 
   6  -3   2    4.74    0.58 
   6   3   2    4.96    0.59 
   6   3   2    3.83    0.46 
  -6  -3   2    4.60    0.57 
   6  -3  -2    3.69    0.55 
  -6   3  -2    3.23    0.51 
  -7   3   2    0.15    0.24 
  -7   3   2    0.31    0.32 
   7  -3   2    0.72    0.34 
   7   3  -2    0.67    0.34 
   7   3  -2    1.07    0.36 
  -7  -3  -2    0.29    0.32 
   7  -3  -2    1.12    0.40 
   7   3   2    0.35    0.27 
  -7  -3   2    0.72    0.36 
   7   3   2    0.93    0.38 
  -7   3  -2    0.71    0.35 
   8   3  -2    2.25    0.51 
   8  -3   2    0.51    0.41 
  -8  -3  -2    1.01    0.43 
   8   3  -2    1.11    0.41 
  -8   3   2    1.38    0.43 
  -8  -3   2    1.02    0.43 
   8   3   2    1.99    0.49 
   8  -3  -2    1.56    0.48 
  -8   3  -2    1.07    0.46 
  -9   3   2    0.09    0.37 
   9   3  -2    0.45    0.40 
  -9  -3  -2    0.03    0.37 
   9  -3   2   -0.18    0.39 
  -9   3  -2    0.00    0.38 
   9  -3  -2   -0.03    0.36 
  -9  -3   2    0.01    0.41 
   0  -4  -2    0.83    0.21 
   0   4   2    0.78    0.21 
   0  -4   2    1.10    0.19 
   0   4   2    0.71    0.20 
   0  -4   2    0.58    0.19 
   0   4  -2    0.74    0.21 
   0  -4  -2    0.77    0.19 
   0   4  -2    0.76    0.20 
   1   4  -2   50.73    1.44 
   1   4  -2   55.08    1.27 
  -1   4   2   51.71    1.45 
   1  -4   2   50.32    1.43 
   1  -4   2   53.65    1.23 
  -1   4   2   53.85    1.33 
  -1  -4  -2   51.56    1.34 
  -1  -4  -2   52.59    1.43 
  -1  -4   2   53.64    1.38 
   1   4   2   52.72    1.33 
  -1  -4   2   52.35    1.43 
  -1   4  -2   52.84    1.45 
   1   4   2   53.05    1.46 
   1  -4  -2   54.51    1.43 
  -1   4  -2   53.48    1.41 
   1  -4  -2   55.44    1.38 
  -2   4   2   46.21    1.39 
   2  -4   2   46.85    1.37 
   2   4  -2   44.96    1.37 
  -2  -4  -2   43.63    1.22 
   2  -4   2   47.33    1.10 
  -2   4   2   46.31    1.16 
   2   4  -2   47.71    1.04 
  -2  -4  -2   45.87    1.36 
  -2  -4   2   45.17    1.31 
   2   4   2   42.77    1.34 
   2   4   2   46.58    1.14 
   2  -4  -2   45.07    1.33 
  -2  -4   2   46.46    1.30 
   2  -4  -2   46.16    1.22 
  -2   4  -2   46.18    1.38 
  -2   4  -2   46.41    1.24 
  -3   4   2   36.90    1.30 
   3  -4   2   38.07    1.10 
   3   4  -2   35.68    1.26 
   3  -4   2   37.42    1.26 
   3  -4   2   41.15    1.01 
  -3   4   2   40.64    1.02 
  -3  -4  -2   37.38    1.12 
  -3  -4  -2   39.95    1.31 
   3  -4  -2   41.22    1.15 
  -3  -4   2   38.76    1.26 
  -3   4  -2   39.51    1.34 
   3  -4  -2   39.04    1.28 
   3   4   2   39.91    0.98 
   3   4   2   37.06    1.30 
  -3  -4   2   40.90    1.23 
   4  -4   2   10.75    0.71 
  -4   4   2   10.57    0.74 
  -4  -4  -2   11.50    0.72 
   4  -4   2   11.28    0.55 
   4   4  -2   12.80    0.77 
  -4  -4  -2   10.91    0.59 
  -4   4   2   13.63    0.64 
  -4  -4   2   11.91    0.66 
   4  -4  -2   10.97    0.72 
   4   4   2   11.74    0.76 
  -4  -4   2   11.51    0.71 
  -4   4  -2   11.83    0.78 
  -5   4   2   22.48    1.09 
   5  -4   2   24.18    1.09 
   5   4  -2   24.12    1.11 
  -5   4   2   25.63    0.97 
  -5  -4  -2   24.41    1.13 
  -5   4  -2   24.10    1.15 
   5  -4  -2   26.74    1.16 
  -5  -4   2   23.12    1.10 
   5   4   2   24.85    1.14 
  -5  -4   2   24.31    1.03 
   5   4   2   22.94    0.93 
  -6   4   2    3.15    0.55 
  -6  -4  -2    4.04    0.60 
   6   4  -2    3.81    0.51 
   6   4  -2    3.69    0.57 
   6  -4   2    3.39    0.56 
   6   4   2    3.10    0.52 
  -6  -4   2    2.90    0.51 
   6  -4  -2    3.89    0.57 
  -6   4  -2    3.31    0.56 
   6   4   2    3.94    0.47 
  -7  -4  -2   12.93    0.98 
  -7   4   2   12.71    0.94 
   7   4  -2   13.10    0.96 
   7  -4   2   11.61    0.90 
   7   4  -2   13.85    0.89 
  -7   4  -2   12.20    0.96 
  -7  -4   2   13.87    0.98 
   7  -4  -2   10.77    0.89 
   7   4   2   12.31    0.93 
   8   4  -2    5.02    0.71 
  -8  -4  -2    4.92    0.74 
   8  -4   2    4.34    0.69 
   8   4  -2    5.54    0.65 
  -8   4   2    4.49    0.69 
  -8   4  -2    4.92    0.73 
  -8  -4   2    5.27    0.74 
   8   4   2    4.19    0.69 
   8  -4  -2    5.35    0.76 
   9  -4   2    2.17    0.59 
  -9   4   2    3.53    0.72 
  -9  -4  -2    2.24    0.62 
  -9  -4   2    3.44    0.72 
  -9   4  -2    2.15    0.62 
   9  -4  -2    2.68    0.68 
   9   4   2    2.69    0.63 
   0   5  -2    1.37    0.27 
   0   5   2    1.54    0.29 
   0  -5   2    1.71    0.26 
   0  -5   2    1.47    0.29 
   0   5   2    1.98    0.32 
   0   5  -2    1.77    0.31 
   0  -5  -2    1.97    0.31 
   0  -5  -2    2.36    0.34 
   1  -5   2    2.26    0.28 
   1  -5   2    1.53    0.30 
  -1   5   2    1.79    0.28 
  -1  -5  -2    1.64    0.32 
   1   5  -2    2.09    0.36 
   1   5  -2    2.10    0.27 
  -1  -5  -2    1.71    0.29 
  -1   5   2    1.61    0.32 
  -1   5  -2    1.48    0.31 
  -1  -5   2    1.24    0.28 
   1  -5  -2    1.24    0.25 
  -1  -5   2    1.73    0.28 
   1   5   2    1.88    0.29 
  -1   5  -2    1.28    0.27 
   1   5   2    2.06    0.35 
   1  -5  -2    1.47    0.30 
   2  -5   2   47.62    1.17 
  -2  -5  -2   45.94    1.32 
  -2   5   2   42.21    1.44 
  -2   5   2   46.32    1.27 
   2   5  -2   46.21    1.48 
  -2  -5  -2   45.49    1.44 
   2  -5   2   47.10    1.47 
  -2  -5   2   43.47    1.36 
   2  -5  -2   44.89    1.27 
   2  -5  -2   45.56    1.42 
   2   5   2   44.41    1.19 
  -2   5  -2   45.06    1.32 
  -2   5  -2   43.18    1.43 
  -2  -5   2   47.18    1.38 
   3   5  -2   20.47    0.99 
  -3  -5  -2   19.97    0.96 
  -3   5   2   22.44    0.75 
  -3  -5  -2   20.47    0.83 
   3  -5   2   20.34    0.95 
  -3   5   2   21.39    1.01 
   3  -5  -2   23.16    0.84 
   3  -5  -2   21.67    0.98 
  -3  -5   2   21.09    0.96 
  -3  -5   2   22.63    0.93 
  -3   5  -2   23.50    1.06 
   3   5   2   21.24    1.02 
  -3   5  -2   23.16    0.85 
  -4  -5  -2   18.11    0.82 
   4  -5   2   19.93    0.99 
  -4  -5  -2   19.86    1.00 
   4   5  -2   19.57    1.02 
  -4   5   2   19.16    1.00 
   4  -5  -2   20.23    0.82 
  -4  -5   2   19.76    0.98 
  -4   5  -2   18.86    1.03 
  -4   5  -2   19.48    0.78 
   4  -5  -2   18.67    0.98 
  -4  -5   2   19.25    0.90 
   4   5   2   19.94    1.05 
   5  -5   2    1.59    0.42 
  -5  -5  -2    1.85    0.43 
  -5   5   2    0.80    0.33 
  -5  -5  -2    0.87    0.28 
   5   5  -2    0.70    0.37 
  -5  -5   2    1.73    0.42 
   5   5   2    1.11    0.38 
   5  -5  -2    1.32    0.38 
  -5  -5   2    0.88    0.29 
  -5   5  -2    0.47    0.36 
   6  -5   2    2.17    0.48 
  -6  -5  -2    2.76    0.56 
   6   5  -2    2.92    0.47 
  -6   5   2    2.14    0.51 
   6   5  -2    2.90    0.54 
   6  -5  -2    2.60    0.54 
  -6  -5   2    1.84    0.46 
   6   5   2    3.00    0.56 
  -6   5  -2    2.30    0.50 
  -7   5   2   11.09    0.91 
  -7  -5  -2   10.94    0.94 
   7  -5   2   10.41    0.90 
   7   5  -2    9.05    0.91 
   7   5  -2   10.62    0.82 
   7  -5  -2   11.48    0.96 
  -7   5  -2   12.35    1.01 
   7   5   2    9.99    0.91 
  -7  -5   2    9.13    0.88 
   8   5  -2    6.41    1.01 
  -8  -5  -2    5.69    0.84 
   8   5  -2    7.10    0.88 
   8  -5   2    6.48    0.85 
  -8   5   2    5.04    0.77 
   8  -5  -2    3.93    0.71 
   8   5   2    4.88    0.78 
  -8   5  -2    4.69    0.75 
  -8  -5   2    5.48    0.80 
   9   5  -2    1.83    0.73 
   9   5   2    1.54    0.60 
   0   6  -2    2.93    0.43 
   0   6   2    3.17    0.43 
   0   6   2    3.46    0.43 
   0  -6  -2    2.46    0.37 
   0   6  -2    3.17    0.42 
   0  -6   2    3.33    0.46 
   0  -6   2    2.94    0.36 
   0  -6  -2    2.68    0.40 
  -1   6   2   10.24    0.63 
  -1  -6  -2   12.05    0.67 
  -1  -6  -2   11.09    0.70 
   1   6  -2   11.66    0.74 
  -1   6   2   11.68    0.72 
   1  -6   2   11.45    0.72 
   1   6  -2   12.19    0.71 
  -1  -6   2   11.04    0.69 
  -1  -6   2   10.98    0.63 
   1  -6  -2   10.41    0.67 
   1   6   2   11.67    0.73 
  -1   6  -2   11.99    0.72 
  -1   6  -2   11.33    0.68 
   1   6   2   11.54    0.62 
   1  -6  -2   10.78    0.63 
  -2   6   2    0.53    0.22 
   2   6  -2    0.64    0.32 
  -2  -6  -2    0.70    0.26 
   2  -6   2    0.39    0.27 
  -2  -6  -2    1.00    0.32 
  -2   6   2    0.89    0.34 
  -2  -6   2    0.32    0.24 
   2   6   2    0.92    0.33 
  -2   6  -2    1.24    0.36 
  -2   6  -2    0.45    0.24 
  -2  -6   2    0.47    0.27 
   2  -6  -2    0.43    0.29 
   2  -6  -2    0.55    0.23 
  -3   6   2  117.62    3.03 
   3   6  -2  111.87    3.00 
  -3  -6  -2  113.06    2.94 
  -3  -6  -2  114.90    2.76 
   3  -6   2  111.12    2.94 
  -3   6  -2  117.27    2.73 
   3   6   2  109.94    2.97 
  -3  -6   2  113.56    2.84 
  -3   6  -2  108.23    2.95 
  -3  -6   2  114.67    2.89 
   3  -6  -2  112.78    2.91 
   4   6  -2    7.75    0.74 
  -4  -6  -2    7.24    0.56 
  -4   6   2    7.96    0.76 
  -4  -6  -2    7.75    0.70 
   4  -6   2    6.82    0.66 
  -4  -6   2    7.24    0.66 
   4   6   2    7.04    0.72 
   4  -6  -2    6.43    0.65 
  -4   6  -2    6.60    0.68 
  -4  -6   2    7.43    0.61 
   5  -6   2   67.61    2.22 
   5   6  -2   70.15    2.28 
  -5  -6  -2   69.68    2.27 
  -5   6   2   72.02    2.34 
   5   6   2   69.01    2.26 
  -5  -6   2   69.69    2.21 
  -5  -6   2   65.58    2.03 
   5  -6  -2   66.87    2.18 
  -5   6  -2   66.48    2.27 
   6   6  -2    1.32    0.49 
  -6  -6  -2    0.25    0.36 
   6  -6   2    0.86    0.40 
  -6   6   2    0.31    0.37 
   6  -6  -2    0.58    0.43 
  -6   6  -2    0.63    0.44 
   6   6   2    0.01    0.37 
  -6  -6   2    0.88    0.35 
  -6  -6   2    0.88    0.39 
  -7  -6  -2   24.49    1.42 
   7   6  -2   27.35    1.48 
   7   6  -2   26.58    1.30 
   7  -6   2   25.27    1.41 
  -7   6   2   26.37    1.46 
  -7   6  -2   25.06    1.46 
  -7  -6   2   26.17    1.44 
   7   6   2   24.64    1.42 
   7  -6  -2   26.02    1.41 
   8  -6   2    0.57    0.71 
   8   6  -2    0.33    0.50 
  -8   6   2    1.06    0.54 
  -8   6  -2    0.89    0.58 
   8   6   2    0.58    0.53 
   0   7  -2    6.10    0.54 
   0  -7  -2    5.67    0.55 
   0  -7   2    5.99    0.58 
   0   7   2    6.30    0.61 
   0   7  -2    5.24    0.57 
   0   7   2    5.82    0.57 
   0  -7  -2    4.71    0.52 
   1   7  -2    1.01    0.36 
  -1  -7  -2    0.60    0.28 
   1  -7   2    1.18    0.35 
  -1   7   2    1.05    0.34 
  -1  -7  -2    0.81    0.34 
  -1   7   2    1.14    0.33 
  -1   7  -2    1.28    0.34 
   1  -7  -2    1.07    0.34 
   1   7   2    0.71    0.33 
  -1  -7   2    1.13    0.35 
  -1   7  -2    0.89    0.33 
   1  -7  -2    0.86    0.30 
  -1  -7   2    1.38    0.31 
   2  -7   2    9.37    0.74 
   2   7  -2   11.36    0.82 
  -2   7   2    7.52    0.71 
  -2  -7  -2    8.70    0.63 
  -2  -7  -2    8.42    0.70 
   2   7   2    9.45    0.78 
  -2   7  -2   10.23    0.77 
  -2   7  -2   10.52    0.69 
   2  -7  -2    9.35    0.73 
  -2  -7   2    8.96    0.66 
  -2  -7   2    8.85    0.69 
  -3  -7  -2   12.91    0.76 
  -3   7   2   13.16    0.91 
  -3  -7  -2   11.31    0.81 
   3   7  -2   12.65    0.89 
   3  -7   2   11.68    0.83 
  -3  -7   2   10.77    0.78 
  -3  -7   2   12.63    0.81 
   3  -7  -2   12.59    0.86 
   3   7   2   10.77    0.88 
  -3   7  -2   12.58    0.89 
  -4  -7  -2    7.40    0.72 
   4   7  -2    8.59    0.82 
  -4   7   2    7.99    0.77 
   4  -7   2    7.46    0.75 
   4  -7  -2    9.26    0.81 
  -4  -7   2    9.33    0.73 
  -4   7  -2   10.29    0.85 
  -4  -7   2    8.64    0.77 
   4   7   2   10.78    0.91 
   5  -7   2    2.55    0.53 
  -5  -7  -2    2.05    0.49 
   5   7  -2    2.16    0.53 
  -5   7   2    2.84    0.62 
   5   7   2    2.47    0.55 
  -5   7  -2    3.67    0.66 
  -5  -7   2    2.42    0.46 
   5  -7  -2    3.10    0.56 
  -5  -7   2    3.06    0.56 
   6  -7   2    0.47    0.40 
  -6   7   2   -0.02    0.38 
   6   7  -2    0.56    0.43 
  -6  -7  -2    0.03    0.37 
  -6   7  -2    0.29    0.43 
   6   7   2    0.48    0.43 
   6  -7  -2    0.36    0.41 
  -6  -7   2   -0.01    0.34 
   7  -7   2    2.22    0.61 
  -7  -7  -2    2.34    0.63 
   7   7  -2    1.45    0.56 
  -7   7   2    3.20    0.70 
  -7   7  -2    1.81    0.60 
   7   7   2    1.57    0.62 
  -7  -7   2    1.78    0.57 
   7  -7  -2    1.82    0.56 
   0  -8  -2    4.74    0.61 
   0   8   2    4.66    0.63 
   0   8  -2    5.21    0.62 
   0  -8   2    4.37    0.60 
  -1  -8  -2   11.13    0.79 
  -1   8   2   10.88    0.75 
  -1  -8  -2   10.79    0.78 
   1   8  -2   10.41    0.83 
  -1   8   2   12.24    0.84 
   1  -8   2    9.65    0.79 
   1   8   2   10.06    0.83 
   1  -8  -2    9.31    0.77 
  -1   8  -2    9.40    0.76 
  -1   8  -2   11.27    0.78 
  -1  -8   2   10.15    0.81 
  -2  -8  -2    9.79    0.80 
  -2  -8  -2    8.97    0.73 
  -2   8   2    9.14    0.80 
   2   8  -2    7.98    0.79 
   2  -8   2    9.81    0.80 
  -2   8  -2    8.36    0.78 
   2   8   2   10.85    0.87 
  -2   8  -2    9.14    0.73 
  -2  -8   2   10.38    0.80 
   2  -8  -2    9.99    0.80 
   3  -8   2    7.30    0.75 
   3   8  -2    5.96    0.81 
  -3   8   2    7.33    0.77 
  -3  -8  -2    5.07    0.67 
   3   8   2    6.66    0.82 
  -3   8  -2    7.51    0.75 
  -3  -8   2    5.04    0.66 
  -3  -8   2    7.05    0.71 
   3  -8  -2    6.60    0.72 
   4  -8   2    3.99    0.66 
   4   8  -2    6.29    0.82 
  -4  -8  -2    5.17    0.73 
  -4   8   2    4.80    0.72 
  -4   8  -2    4.62    0.70 
  -4  -8   2    6.25    0.74 
   4  -8  -2    4.23    0.65 
   4   8   2    4.85    0.73 
  -4  -8   2    5.83    0.67 
   5  -8   2    9.81    0.91 
   5   8  -2    9.99    0.99 
  -5   8   2    9.73    0.97 
  -5  -8  -2    8.52    0.88 
   5  -8  -2   11.73    1.01 
   5   8   2    8.24    0.95 
  -5  -8   2   10.41    0.94 
  -5   8  -2    8.74    0.96 
   6   8  -2    0.20    0.50 
  -6   8   2    0.51    0.52 
  -6  -8  -2    1.17    0.52 
   6  -8   2    1.39    0.54 
   6  -8  -2    0.55    0.45 
  -6   8  -2    0.30    0.49 
   6   8   2    0.18    0.56 
  -6  -8   2    0.99    0.47 
   0  -9  -2    6.02    0.73 
   0  -9   2    5.67    0.70 
   0   9   2    6.98    0.75 
   0   9  -2    7.52    0.79 
   1   9  -2    5.09    0.72 
   1  -9   2    5.72    0.75 
  -1  -9  -2    5.81    0.71 
   1   9   2    7.43    0.83 
  -1  -9   2    5.81    0.73 
  -1   9  -2    5.98    0.68 
   1  -9  -2    6.04    0.71 
  -2   9   2    4.90    0.71 
   2  -9   2    3.86    0.64 
   2   9  -2    4.18    0.70 
   2   9   2    3.07    0.62 
  -2   9  -2    4.10    0.68 
   2  -9  -2    4.84    0.70 
  -2  -9   2    3.99    0.62 
   3  -9   2    2.46    0.58 
  -3  -9  -2    2.54    0.55 
  -3   9   2    4.22    0.71 
   3   9  -2    2.85    0.64 
  -3   9  -2    3.04    0.64 
   3  -9  -2    2.26    0.56 
   3   9   2    2.34    0.60 
  -3  -9   2    3.18    0.58 
  -4  -9  -2    2.89    0.64 
   4  -9   2    3.07    0.63 
  -4   9   2    3.75    0.72 
   4   9  -2    3.14    0.72 
   4  -9  -2    3.75    0.68 
   4   9   2    3.83    0.76 
  -4   9  -2    4.78    0.77 
  -5  -9  -2    0.22    0.39 
  -5  -9   2    0.38    0.45 
   0  10  -2    0.22    0.38 
   0 -10   2   -0.78    0.36 
   1  10  -2    1.59    0.56 
   1 -10   2    1.12    0.52 
   1  10   2    0.96    0.51 
  -1 -10   2    1.50    0.54 
   1 -10  -2    1.15    0.48 
   2 -10   2    7.07    0.87 
   2  10  -2    9.60    1.01 
   2  10   2    8.97    1.04 
   2 -10  -2   10.26    0.96 
  -2 -10   2   10.87    0.98 
  -3  10   2    8.49    0.95 
  -3  10  -2   10.29    1.12 
   3 -10  -2   14.29    1.70 
   0   0   3   -0.12    0.04 
   0   0   3   -0.17    0.04 
   0   0   3   -0.10    0.05 
   0   0   3   -0.16    0.05 
  -1   0   3  997.98   18.55 
  -1   0   3 1000.00   18.53 
   1   0  -3  961.56   18.58 
   1   0   3  989.25   18.64 
  -1   0  -3  969.82   18.55 
  -1   0  -3  913.61   18.26 
   1   0  -3  973.21   18.24 
   1   0   3  995.98   18.29 
   2   0  -3   11.00    0.35 
  -2   0  -3   10.76    0.41 
  -2   0   3   10.70    0.38 
   2   0   3   10.01    0.38 
   2   0   3   10.07    0.41 
  -2   0  -3   10.92    0.42 
   3   0   3   33.79    0.95 
  -3   0   3   33.78    0.89 
   3   0   3   34.31    0.93 
  -3   0   3   32.80    0.99 
   3   0  -3   35.33    0.86 
  -3   0  -3   33.77    0.95 
   3   0  -3   32.79    0.98 
  -3   0  -3   34.29    0.95 
  -4   0  -3    0.00    0.15 
   4   0  -3    0.47    0.20 
  -4   0   3    0.57    0.20 
   4   0   3    0.39    0.17 
   4   0   3    0.18    0.16 
   4   0  -3    0.12    0.14 
  -4   0  -3    0.27    0.17 
  -4   0   3    0.00    0.13 
   5   0   3   24.32    0.92 
  -5   0  -3   22.96    0.92 
  -5   0   3   23.14    0.95 
  -5   0  -3   23.24    0.88 
   5   0  -3   23.83    0.80 
   5   0   3   22.28    0.87 
  -5   0   3   24.80    0.85 
   5   0  -3   23.80    0.96 
  -6   0  -3    1.51    0.33 
   6   0  -3    1.35    0.36 
  -6   0   3    0.80    0.30 
  -6   0  -3    0.97    0.30 
   6   0   3    1.36    0.34 
  -6   0   3    1.19    0.28 
   6   0   3    1.36    0.31 
   7   0   3    0.11    0.23 
  -7   0   3   -0.31    0.25 
  -7   0  -3   -0.05    0.25 
  -7   0  -3   -0.03    0.24 
   7   0   3    0.53    0.29 
   7   0  -3    0.49    0.31 
   8   0   3    4.83    0.64 
  -8   0   3    5.56    0.72 
  -8   0  -3    4.22    0.62 
   8   0  -3    3.79    0.59 
   9   0   3    1.81    0.49 
   9   0  -3    1.56    0.49 
  -9   0   3    1.64    0.49 
  -9   0  -3    1.93    0.52 
  10   0  -3    1.78    0.58 
 -10   0   3    0.87    0.49 
   0   1   3   55.32    1.23 
   0  -1   3   57.51    1.13 
   0   1   3   58.01    1.19 
   0  -1   3   56.60    1.23 
   0   1  -3   57.38    1.20 
   0  -1   3   56.21    1.22 
   0  -1  -3   58.25    1.15 
  -1   1   3  291.27    5.62 
   1  -1   3  288.95    5.60 
   1  -1   3  293.00    5.59 
   1   1  -3  294.54    5.60 
  -1   1   3  292.81    5.64 
  -1  -1  -3  297.48    5.64 
  -1  -1  -3  298.99    5.47 
  -1   1  -3  291.37    5.65 
   1   1   3  294.10    5.59 
  -1  -1   3  300.75    5.62 
   1  -1  -3  289.40    5.61 
  -1  -1   3  292.78    5.63 
  -1  -1   3  297.41    5.48 
  -1   1  -3  292.50    5.46 
   1   1   3  299.49    5.65 
  -2   1   3   89.35    1.97 
  -2   1   3   88.44    1.96 
   2  -1   3   88.13    1.93 
   2  -1   3   91.08    1.92 
   2   1  -3   90.96    1.92 
  -2  -1  -3   90.66    1.98 
  -2  -1  -3   92.06    1.89 
  -2  -1   3   93.13    1.78 
  -2  -1   3   89.49    2.00 
  -2   1  -3   91.46    2.01 
  -2   1  -3   91.82    1.85 
  -2  -1   3   89.60    1.98 
   2  -1  -3   90.61    1.99 
   2   1   3   91.16    1.85 
   2   1   3   91.61    2.00 
   2  -1  -3   92.14    1.72 
  -3  -1  -3   90.42    2.11 
  -3  -1  -3   93.71    2.00 
   3  -1   3   91.62    2.08 
   3   1  -3   92.25    2.04 
  -3   1   3   90.14    2.09 
   3  -1   3   93.78    2.03 
  -3   1   3   93.23    2.09 
  -3  -1   3   91.03    2.13 
  -3   1  -3   91.77    2.12 
  -3  -1   3   93.04    1.89 
   3  -1  -3   94.11    1.85 
  -3   1  -3   92.49    2.00 
   3   1   3   89.99    2.11 
   3  -1  -3   93.28    2.13 
   3   1   3   95.45    2.00 
  -4   1   3   12.91    0.60 
   4  -1   3   12.80    0.61 
   4   1  -3   11.95    0.60 
   4  -1   3   13.41    0.56 
  -4   1   3   13.52    0.62 
   4   1  -3   13.01    0.58 
  -4  -1  -3   13.78    0.55 
  -4  -1  -3   14.23    0.66 
  -4  -1   3   12.84    0.65 
  -4   1  -3   14.28    0.58 
  -4   1  -3   13.98    0.64 
   4   1   3   13.79    0.58 
   4  -1  -3   13.28    0.66 
   4  -1  -3   13.74    0.45 
  -4  -1   3   12.92    0.47 
   4   1   3   13.07    0.62 
  -5   1   3   11.18    0.62 
   5   1  -3   10.77    0.60 
  -5  -1  -3   10.66    0.66 
  -5   1   3   11.42    0.65 
   5   1  -3   11.01    0.65 
  -5  -1  -3   11.44    0.57 
   5  -1   3   12.03    0.68 
   5  -1   3   11.20    0.57 
  -5   1  -3   11.73    0.61 
   5  -1  -3   11.22    0.47 
   5   1   3   10.07    0.57 
  -5  -1   3   11.88    0.51 
  -5   1  -3   10.88    0.65 
  -5  -1   3   10.62    0.67 
   5  -1  -3   10.63    0.64 
   5   1   3   11.11    0.64 
  -6  -1  -3    6.27    0.58 
   6   1  -3    6.41    0.54 
  -6   1   3    5.51    0.53 
  -6  -1  -3    6.19    0.50 
   6   1  -3    6.26    0.58 
   6  -1   3    6.39    0.59 
   6  -1   3    5.87    0.49 
  -6   1   3    5.58    0.52 
   6  -1  -3    6.48    0.59 
  -6   1  -3    5.40    0.58 
  -6  -1   3    5.12    0.57 
   6   1   3    5.41    0.53 
  -6   1  -3    5.77    0.52 
   6   1   3    6.63    0.54 
  -7   1   3   49.32    1.68 
   7  -1   3   44.86    1.63 
   7   1  -3   49.25    1.71 
  -7  -1  -3   48.42    1.70 
  -7   1   3   50.05    1.60 
   7   1   3   48.43    1.59 
   7   1   3   46.07    1.56 
  -7   1  -3   46.30    1.56 
  -7   1  -3   46.96    1.62 
  -7  -1   3   47.49    1.71 
   7  -1  -3   47.14    1.70 
   8   1  -3    9.59    0.81 
  -8   1   3    8.01    0.76 
   8  -1   3    9.82    0.82 
  -8  -1  -3    9.97    0.81 
   8  -1  -3    7.76    0.79 
  -8   1  -3    9.04    0.78 
  -8   1  -3    8.62    0.72 
  -8  -1   3    9.97    0.84 
   8   1   3    8.08    0.76 
   8   1   3    9.35    0.78 
   9   1  -3    2.97    0.61 
   9  -1   3    3.32    0.62 
  -9  -1  -3    3.80    0.64 
  -9   1   3    4.59    0.70 
   9  -1  -3    3.04    0.61 
  -9  -1   3    3.42    0.66 
 -10  -1  -3   -0.42    0.33 
  10   1  -3    0.29    0.45 
 -10   1   3    0.27    0.43 
  10  -1   3    0.29    0.46 
  10  -1  -3    0.76    0.55 
 -10  -1   3    0.46    0.77 
   0  -2   3   60.96    1.39 
   0  -2  -3   62.64    1.31 
   0   2  -3   60.53    1.33 
   0   2   3   60.24    1.34 
   0  -2   3   61.75    1.26 
   0   2   3   62.14    1.39 
   0   2  -3   58.99    1.38 
   0  -2  -3   58.98    1.38 
   1  -2   3  321.01    6.26 
  -1   2   3  321.89    6.29 
   1  -2   3  320.61    6.23 
   1   2  -3  323.36    6.27 
  -1   2   3  331.10    6.09 
  -1  -2  -3  322.57    6.28 
  -1  -2  -3  319.42    6.11 
   1   2  -3  332.13    6.06 
   1   2   3  316.88    6.21 
  -1   2  -3  318.97    6.20 
  -1  -2   3  323.68    6.14 
   1   2   3  322.91    6.12 
   1  -2  -3  314.38    6.16 
  -1  -2   3  328.24    6.20 
   1  -2  -3  317.66    6.16 
  -2   2   3    3.38    0.15 
   2  -2   3    3.82    0.32 
  -2   2   3    3.73    0.28 
  -2  -2  -3    2.93    0.31 
  -2  -2  -3    3.30    0.22 
   2   2  -3    3.46    0.31 
   2  -2   3    4.00    0.27 
  -2   2   3    3.39    0.33 
   2   2   3    3.08    0.32 
  -2  -2   3    2.94    0.30 
  -2   2  -3    3.39    0.18 
   2   2   3    3.58    0.23 
   2  -2  -3    2.93    0.31 
  -2   2  -3    3.20    0.33 
  -2  -2   3    3.30    0.29 
   3   2  -3   57.99    1.50 
  -3   2   3   58.01    1.54 
  -3   2   3   57.75    1.47 
   3  -2   3   60.53    1.42 
  -3  -2  -3   57.34    1.55 
   3  -2   3   56.60    1.50 
  -3  -2  -3   61.23    1.35 
   3  -2  -3   60.94    1.21 
   3  -2  -3   58.74    1.55 
  -3   2  -3   59.02    1.34 
  -3   2  -3   59.19    1.58 
  -3  -2   3   59.41    1.56 
  -3  -2   3   59.54    1.52 
   3   2   3   60.96    1.40 
   3   2   3   58.40    1.56 
   4  -2   3   29.65    1.03 
   4   2  -3   30.90    1.03 
  -4  -2  -3   29.12    1.07 
   4   2  -3   30.65    1.03 
   4  -2   3   30.26    0.92 
  -4  -2  -3   32.26    0.88 
  -4   2   3   30.35    1.00 
  -4   2   3   30.50    1.06 
   4   2   3   30.97    0.94 
  -4  -2   3   31.42    1.10 
  -4  -2   3   32.52    0.72 
  -4   2  -3   32.45    0.92 
   4   2   3   32.56    1.10 
   4  -2  -3   30.42    0.75 
   4  -2  -3   30.60    1.08 
  -4   2  -3   31.20    1.10 
  -5   2   3    0.28    0.21 
  -5  -2  -3    0.35    0.25 
   5   2  -3    0.02    0.18 
   5   2  -3    0.53    0.26 
   5  -2   3    0.36    0.26 
  -5  -2  -3    0.19    0.18 
  -5   2   3    0.24    0.25 
   5  -2   3    0.18    0.18 
  -5   2  -3    0.76    0.23 
  -5   2  -3    0.28    0.28 
  -5  -2   3    0.15    0.20 
   5   2   3    0.30    0.20 
   5   2   3    0.17    0.26 
   5  -2  -3    0.04    0.23 
  -6  -2  -3    3.73    0.53 
   6  -2   3    3.72    0.40 
   6   2  -3    4.59    0.54 
   6   2  -3    5.03    0.53 
   6  -2   3    4.40    0.56 
  -6   2   3    4.73    0.51 
  -6   2   3    3.98    0.52 
  -6  -2   3    3.73    0.53 
   6  -2  -3    3.53    0.52 
  -6   2  -3    3.93    0.53 
  -6   2  -3    5.17    0.47 
   6   2   3    4.08    0.54 
   6   2   3    4.59    0.49 
  -7   2   3   18.63    0.99 
   7   2  -3   18.06    0.93 
   7   2  -3   18.21    0.98 
   7  -2   3   17.00    0.99 
  -7  -2  -3   18.74    1.05 
  -7   2   3   16.24    0.93 
   7   2   3   16.48    0.88 
  -7  -2   3   16.85    1.00 
   7  -2  -3   17.27    1.03 
  -7   2  -3   16.36    0.97 
   7   2   3   17.55    0.97 
  -8   2   3    2.58    0.51 
  -8   2   3    1.80    0.46 
  -8  -2  -3    2.05    0.49 
   8   2  -3    2.19    0.48 
   8  -2   3    1.80    0.48 
   8   2   3    2.95    0.51 
  -8  -2   3    2.31    0.52 
  -8   2  -3    1.21    0.45 
   8  -2  -3    2.26    0.55 
   8   2   3    1.94    0.45 
  -9   2   3    6.76    0.76 
   9   2  -3    6.95    0.77 
  -9  -2  -3    5.20    0.78 
   9  -2   3    6.30    0.81 
   9  -2  -3    6.85    0.87 
  -9  -2   3    6.40    0.86 
  10   2  -3    5.09    0.80 
  10  -2   3    6.04    0.84 
   0  -3   3  124.82    2.67 
   0  -3  -3  128.00    2.60 
   0   3   3  123.65    2.61 
   0   3  -3  122.21    2.67 
   0  -3   3  124.00    2.50 
   0  -3  -3  121.03    2.64 
   0   3  -3  126.58    2.60 
   0   3   3  121.97    2.64 
  -1   3   3    0.21    0.16 
   1  -3   3   -0.02    0.13 
   1   3  -3    0.14    0.15 
  -1  -3  -3    0.05    0.11 
   1   3  -3    0.18    0.11 
  -1   3   3   -0.01    0.11 
   1  -3   3   -0.01    0.08 
  -1  -3  -3   -0.09    0.14 
  -1   3  -3   -0.10    0.14 
   1   3   3   -0.06    0.11 
   1  -3  -3   -0.05    0.13 
  -1  -3   3    0.01    0.13 
  -1  -3   3    0.04    0.12 
   1   3   3    0.30    0.19 
   1  -3  -3   -0.02    0.12 
  -1   3  -3    0.20    0.13 
  -2  -3  -3   67.56    1.53 
  -2  -3  -3   66.59    1.70 
  -2   3   3   64.68    1.72 
   2   3  -3   65.70    1.68 
  -2   3   3   69.40    1.44 
   2  -3   3   67.71    1.70 
   2  -3   3   69.72    1.40 
   2  -3   3   66.72    1.59 
   2   3   3   65.56    1.71 
   2  -3  -3   66.95    1.61 
   2  -3  -3   70.34    1.70 
   2   3   3   68.36    1.52 
  -2   3  -3   66.63    1.72 
  -2  -3   3   67.32    1.66 
  -2  -3   3   68.39    1.67 
   3  -3   3    1.13    0.25 
  -3   3   3    1.51    0.15 
  -3   3   3    1.07    0.22 
  -3  -3  -3    1.25    0.20 
  -3   3   3    1.30    0.29 
   3  -3   3    0.95    0.20 
   3   3  -3    1.04    0.25 
  -3  -3  -3    1.37    0.28 
   3   3   3    1.76    0.33 
  -3  -3   3    1.16    0.24 
  -3   3  -3    1.24    0.28 
  -3   3  -3    1.20    0.17 
   3   3   3    1.31    0.18 
   3  -3  -3    1.67    0.33 
  -3  -3   3    1.38    0.27 
  -4  -3  -3   33.52    0.88 
  -4   3   3   32.32    1.04 
   4   3  -3   31.67    1.13 
   4  -3   3   32.03    1.14 
   4  -3   3   30.80    0.97 
  -4  -3  -3   29.37    1.14 
  -4   3   3   30.61    1.14 
  -4  -3   3   33.00    1.18 
   4  -3  -3   31.63    1.15 
   4   3   3   32.44    1.18 
   4   3   3   32.71    1.00 
  -4   3  -3   33.79    0.93 
  -4   3  -3   31.58    1.18 
  -4  -3   3   31.76    1.10 
   5  -3   3   49.58    1.59 
   5   3  -3   49.96    1.57 
  -5  -3  -3   49.24    1.62 
  -5   3   3   48.72    1.60 
   5  -3   3   49.46    1.36 
  -5   3   3   47.06    1.45 
   5   3  -3   47.15    1.49 
  -5   3  -3   50.63    1.65 
  -5  -3   3   49.30    1.61 
  -5   3  -3   49.07    1.60 
   5  -3  -3   47.40    1.60 
   5   3   3   48.26    1.40 
   5   3   3   47.15    1.58 
   6   3  -3    1.18    0.33 
   6   3  -3    1.09    0.38 
  -6   3   3    1.91    0.37 
   6  -3   3    1.30    0.39 
  -6   3   3    1.15    0.37 
  -6  -3  -3    1.76    0.44 
   6  -3  -3    1.65    0.42 
  -6  -3   3    0.63    0.33 
   6   3   3    1.50    0.41 
  -6   3  -3    1.57    0.41 
   6   3   3    1.51    0.33 
  -7  -3  -3   29.59    1.38 
  -7   3   3   30.40    1.25 
   7   3  -3   30.33    1.28 
   7  -3   3   27.53    1.30 
  -7   3   3   28.59    1.31 
   7   3  -3   30.10    1.30 
   7  -3  -3   29.97    1.39 
  -7   3  -3   30.14    1.36 
   7   3   3   30.55    1.22 
  -7  -3   3   28.58    1.36 
   7   3   3   30.10    1.32 
  -8  -3  -3    1.95    0.52 
  -8   3   3    2.23    0.50 
   8   3  -3    1.38    0.41 
   8  -3   3    1.51    0.51 
   8   3   3    1.68    0.48 
  -8  -3   3    1.30    0.46 
  -8   3  -3    1.44    0.52 
   8  -3  -3    1.52    0.46 
   9   3  -3   13.21    1.04 
   9  -3   3   10.67    0.98 
  -9   3   3   13.23    1.29 
  -9  -3  -3   12.71    1.08 
   9   3   3   11.85    1.01 
  -9   3  -3   13.54    1.06 
  -9  -3   3   10.34    1.02 
   9  -3  -3   11.25    1.04 
   0  -4  -3    0.74    0.20 
   0  -4   3    1.15    0.23 
   0   4   3    0.96    0.24 
   0  -4  -3    1.33    0.22 
   0   4  -3    1.23    0.23 
   0   4  -3    0.98    0.22 
   0   4   3    1.44    0.25 
   0  -4   3    0.85    0.17 
   1   4  -3   70.87    1.82 
  -1   4   3   71.00    1.68 
   1   4  -3   72.46    1.62 
   1  -4   3   69.35    1.81 
  -1   4   3   70.94    1.82 
  -1  -4  -3   72.38    1.82 
   1  -4   3   73.86    1.55 
  -1  -4  -3   69.98    1.68 
  -1  -4   3   72.39    1.72 
   1   4   3   72.84    1.71 
  -1   4  -3   70.82    1.77 
   1  -4  -3   71.43    1.75 
   1  -4  -3   73.11    1.78 
   1   4   3   71.89    1.81 
  -1   4  -3   72.92    1.81 
  -1  -4   3   69.50    1.78 
   2   4  -3   24.99    0.63 
  -2  -4  -3   24.45    0.93 
  -2  -4  -3   25.28    0.80 
   2  -4   3   26.40    0.67 
   2   4  -3   24.11    0.92 
   2  -4   3   23.47    0.92 
  -2   4   3   24.10    0.95 
  -2   4   3   24.74    0.74 
   2   4   3   25.45    0.76 
   2  -4  -3   24.56    0.83 
   2   4   3   25.29    0.95 
  -2   4  -3   24.83    0.84 
  -2   4  -3   24.13    0.93 
  -2  -4   3   24.63    0.88 
   2  -4  -3   23.50    0.90 
  -2  -4   3   23.27    0.87 
  -3  -4  -3    5.10    0.49 
  -3   4   3    5.20    0.30 
   3  -4   3    4.69    0.28 
   3  -4   3    5.46    0.40 
   3   4  -3    3.61    0.43 
  -3  -4  -3    4.85    0.38 
  -3   4   3    3.94    0.49 
   3  -4   3    5.23    0.49 
  -3   4  -3    4.37    0.48 
  -3  -4   3    4.10    0.41 
   3  -4  -3    3.83    0.36 
   3   4   3    4.48    0.30 
   3   4   3    4.63    0.53 
  -3  -4   3    3.91    0.44 
   3  -4  -3    4.84    0.48 
  -4  -4  -3   15.99    0.70 
   4  -4   3   15.65    0.84 
  -4   4   3   15.98    0.73 
  -4   4   3   14.55    0.85 
   4  -4   3   16.50    0.68 
  -4  -4  -3   14.34    0.84 
   4   4  -3   15.93    0.83 
  -4  -4   3   16.51    0.78 
   4   4   3   16.15    0.87 
  -4   4  -3   16.20    0.90 
  -4  -4   3   15.03    0.81 
   4  -4  -3   13.49    0.78 
  -5   4   3    9.28    0.72 
  -5   4   3   10.12    0.63 
  -5  -4  -3   10.01    0.76 
   5  -4   3    9.89    0.74 
   5   4  -3   10.22    0.75 
  -5   4  -3    9.57    0.79 
   5   4   3    9.66    0.58 
   5   4   3   10.00    0.78 
  -5  -4   3    8.43    0.63 
   5  -4  -3    9.53    0.74 
  -5  -4   3    9.31    0.72 
   6  -4   3   14.30    0.89 
  -6   4   3   12.39    0.76 
  -6  -4  -3   11.44    0.86 
   6   4  -3   12.63    0.79 
   6   4  -3   12.74    0.86 
  -6   4   3   12.45    0.88 
   6   4   3   13.51    0.74 
  -6   4  -3   12.60    0.91 
  -6  -4   3   13.47    0.90 
   6   4   3   12.51    0.88 
   6  -4  -3   11.53    0.85 
   7  -4   3    5.17    0.68 
   7   4  -3    4.27    0.60 
   7   4  -3    3.96    0.61 
  -7  -4  -3    5.39    0.73 
  -7   4   3    4.14    0.64 
   7   4   3    4.31    0.66 
  -7  -4   3    5.84    0.72 
   7  -4  -3    3.62    0.63 
  -7   4  -3    3.27    0.61 
  -8  -4  -3   11.82    1.03 
   8   4  -3   11.27    0.94 
   8  -4   3   11.30    0.96 
  -8   4   3   11.07    0.96 
   8   4  -3   10.65    0.86 
  -8  -4   3   12.35    1.00 
   8   4   3   12.84    1.00 
   8  -4  -3   10.09    0.94 
  -8   4  -3   10.60    0.97 
  -9   4   3    7.23    0.89 
  -9  -4  -3    9.32    1.04 
   9   4  -3    9.25    0.93 
   9  -4   3    7.05    0.87 
  -9   4  -3    7.00    0.93 
  -9  -4   3    6.75    1.06 
   9   4   3    7.43    0.90 
   9  -4  -3    7.27    0.94 
   0  -5   3    9.15    0.47 
   0   5  -3    9.34    0.57 
   0  -5   3    9.00    0.57 
   0   5  -3    9.29    0.56 
   0   5   3    9.57    0.56 
   0  -5  -3    8.69    0.52 
   0  -5  -3    8.98    0.55 
   0   5   3    9.94    0.57 
   1   5  -3    8.30    0.47 
  -1  -5  -3    7.57    0.49 
   1   5  -3    7.77    0.57 
  -1   5   3    6.94    0.55 
   1  -5   3    8.31    0.57 
   1  -5   3    7.86    0.40 
  -1   5   3    8.15    0.49 
  -1  -5  -3    7.62    0.55 
   1  -5  -3    8.15    0.54 
  -1  -5   3    8.48    0.56 
   1   5   3    7.14    0.56 
   1  -5  -3    8.17    0.51 
   1   5   3    8.59    0.50 
  -1   5  -3    8.27    0.53 
  -1  -5   3    7.27    0.47 
  -1   5  -3    7.79    0.58 
   2  -5   3   11.09    0.66 
  -2   5   3   12.61    0.56 
  -2   5   3   12.01    0.73 
  -2  -5  -3   11.36    0.70 
  -2  -5  -3   11.48    0.58 
  -2   5  -3   11.69    0.62 
  -2  -5   3   12.49    0.68 
   2  -5  -3   12.45    0.62 
  -2   5  -3   11.18    0.72 
  -2  -5   3   12.08    0.65 
   2   5   3   12.37    0.56 
   2   5   3   11.36    0.72 
   2  -5  -3   11.52    0.68 
  -3  -5  -3   60.55    1.60 
  -3   5   3   61.21    1.85 
  -3  -5  -3   56.50    1.78 
   3   5  -3   58.17    1.79 
   3  -5   3   58.75    1.77 
   3  -5  -3   61.77    1.63 
  -3  -5   3   59.89    1.75 
  -3   5  -3   59.86    1.62 
  -3  -5   3   58.55    1.71 
   3  -5  -3   60.78    1.78 
  -3   5  -3   58.76    1.83 
   3   5   3   58.32    1.82 
  -4  -5  -3    5.00    0.45 
   4  -5   3    4.17    0.54 
   4   5  -3    4.77    0.61 
   4  -5   3    5.36    0.45 
  -4   5   3    4.03    0.56 
  -4  -5  -3    4.08    0.54 
   4  -5  -3    4.50    0.44 
  -4  -5   3    5.01    0.52 
   4   5   3    3.79    0.53 
  -4  -5   3    4.87    0.57 
   4  -5  -3    4.88    0.58 
  -4   5  -3    5.59    0.66 
  -5   5   3   14.54    0.95 
   5  -5   3   15.00    0.92 
  -5  -5  -3   15.48    0.96 
   5   5  -3   12.78    0.90 
  -5  -5   3   13.57    0.88 
  -5  -5   3   14.14    0.81 
  -5   5  -3   14.86    0.96 
   5   5   3   13.75    0.93 
   5  -5  -3   12.62    0.86 
  -6   5   3    0.19    0.36 
   6   5  -3    0.16    0.34 
  -6  -5  -3    0.25    0.30 
   6   5  -3    0.73    0.29 
   6  -5   3    0.33    0.34 
   6  -5  -3   -0.10    0.30 
  -6  -5   3    0.76    0.35 
  -6   5  -3    0.32    0.35 
   6   5   3    0.62    0.40 
  -7   5   3   13.95    1.07 
   7  -5   3   13.22    1.02 
   7   5  -3   12.85    0.99 
   7   5  -3   14.69    0.93 
  -7  -5  -3   14.32    1.05 
   7  -5  -3   12.56    0.99 
  -7  -5   3   14.22    1.03 
   7   5   3   11.00    0.95 
  -7   5  -3   12.72    1.01 
  -8  -5  -3    5.48    0.86 
   8  -5   3    3.96    0.70 
   8   5  -3    3.88    0.64 
   8   5  -3    5.02    0.79 
  -8   5   3    4.25    0.74 
   8  -5  -3    5.59    0.83 
   8   5   3    4.59    0.76 
  -8   5  -3    5.62    0.86 
  -8  -5   3    4.98    0.77 
   0  -6   3   27.19    0.92 
   0   6  -3   24.60    1.05 
   0  -6   3   25.90    1.07 
   0  -6  -3   27.97    1.06 
   0   6   3   26.44    1.03 
   0   6  -3   26.82    1.01 
   0   6   3   25.77    1.05 
   0  -6  -3   26.66    1.02 
  -1   6   3   62.17    1.84 
   1   6  -3   61.29    1.86 
  -1  -6  -3   61.69    1.81 
  -1   6   3   64.11    1.73 
  -1  -6  -3   63.83    1.73 
   1  -6   3   59.05    1.81 
  -1   6  -3   61.20    1.77 
  -1  -6   3   57.86    1.78 
   1  -6  -3   61.67    1.79 
   1   6   3   60.82    1.83 
  -1   6  -3   63.72    1.82 
  -1  -6   3   61.86    1.68 
   1   6   3   61.04    1.68 
   1  -6  -3   64.04    1.74 
   2  -6   3   28.64    1.19 
  -2  -6  -3   28.35    1.17 
  -2  -6  -3   29.62    1.05 
  -2   6   3   28.63    1.21 
  -2   6   3   30.01    1.03 
   2   6  -3   29.13    1.22 
  -2   6  -3   30.96    1.11 
   2   6   3   27.88    1.19 
  -2  -6   3   28.67    1.10 
   2  -6  -3   29.31    1.16 
  -2  -6   3   26.02    1.10 
  -2   6  -3   28.76    1.18 
   2  -6  -3   29.50    1.06 
   3   6  -3   77.29    2.32 
  -3  -6  -3   81.88    2.10 
  -3  -6  -3   80.82    2.32 
  -3   6   3   79.23    2.35 
   3  -6   3   83.66    2.34 
  -3  -6   3   81.81    2.28 
  -3   6  -3   85.04    2.19 
  -3   6  -3   82.57    2.40 
   3  -6  -3   84.03    2.14 
   3  -6  -3   85.25    2.36 
  -3  -6   3   81.27    2.26 
   3   6   3   81.46    2.39 
  -4  -6  -3    7.70    0.73 
  -4   6   3    7.80    0.71 
   4  -6   3    8.18    0.71 
   4   6  -3    8.33    0.76 
  -4   6  -3    9.30    0.76 
   4   6   3    8.32    0.76 
  -4  -6   3    7.67    0.66 
  -4  -6   3    8.51    0.67 
   4  -6  -3    8.48    0.72 
  -5   6   3    8.48    0.81 
  -5  -6  -3    8.22    0.80 
   5   6  -3    7.55    0.79 
   5  -6   3    8.82    0.80 
   5  -6  -3    8.81    0.78 
  -5   6  -3    7.65    0.82 
  -5  -6   3   10.10    0.81 
  -5  -6   3    8.47    0.70 
   5   6   3    8.39    0.82 
  -6   6   3    5.36    0.77 
   6  -6   3    4.30    0.67 
   6   6  -3    5.71    0.76 
  -6  -6  -3    4.39    0.67 
   6   6   3    6.01    0.77 
  -6   6  -3    4.45    0.71 
  -6  -6   3    4.57    0.66 
   6  -6  -3    5.35    0.74 
  -6  -6   3    5.26    0.64 
  -7  -6  -3    1.41    0.48 
  -7   6   3    1.13    0.47 
   7  -6   3    1.07    0.49 
   7   6  -3    0.89    0.50 
   7   6  -3    1.15    0.38 
   7  -6  -3    1.35    0.46 
   7   6   3    1.36    0.54 
  -7   6  -3    0.98    0.47 
  -7  -6   3    1.80    0.51 
   8   6  -3   16.25    1.23 
  -8   6   3   15.40    1.19 
   8  -6   3   15.47    1.75 
   8   6   3   15.65    1.23 
   0   7  -3    7.45    0.62 
   0   7   3    6.22    0.62 
   0  -7  -3    7.91    0.61 
   0  -7  -3    7.79    0.65 
   0   7  -3    7.04    0.64 
   0  -7   3    8.04    0.67 
   0   7   3    9.31    0.66 
  -1   7   3    5.44    0.58 
  -1  -7  -3    3.72    0.46 
   1   7  -3    4.79    0.58 
  -1   7   3    4.58    0.51 
   1  -7   3    4.63    0.56 
  -1  -7  -3    3.83    0.51 
  -1  -7   3    3.95    0.52 
   1  -7  -3    4.64    0.52 
  -1   7  -3    5.00    0.58 
   1  -7  -3    3.61    0.49 
   1   7   3    4.36    0.56 
  -1   7  -3    4.06    0.52 
   2   7  -3   10.77    0.82 
  -2   7   3   11.83    0.84 
  -2  -7  -3   12.73    0.82 
  -2  -7  -3   11.81    0.73 
   2  -7   3   12.30    0.83 
  -2   7  -3   12.07    0.83 
   2  -7  -3   11.71    0.79 
  -2  -7   3   12.58    0.76 
  -2   7  -3   11.14    0.72 
   2   7   3   12.31    0.86 
  -2  -7   3   11.68    0.79 
   3   7  -3    3.78    0.59 
   3  -7   3    3.67    0.57 
  -3   7   3    4.86    0.67 
  -3  -7  -3    2.66    0.51 
  -3  -7   3    3.17    0.49 
  -3  -7   3    3.26    0.49 
  -3   7  -3    3.46    0.58 
  -3   7  -3    4.44    0.48 
   3   7   3    3.90    0.62 
   3  -7  -3    3.42    0.53 
  -4   7   3    2.96    0.57 
   4  -7   3    4.05    0.62 
   4   7  -3    3.65    0.60 
  -4  -7  -3    3.73    0.60 
  -4   7  -3    3.71    0.62 
  -4  -7   3    4.04    0.58 
   4   7   3    4.07    0.64 
   4  -7  -3    3.69    0.59 
  -4  -7   3    3.35    0.52 
  -5  -7  -3    9.04    0.85 
   5  -7   3   10.46    0.88 
  -5   7   3   10.53    0.92 
   5   7  -3   10.29    0.93 
  -5  -7   3    8.82    0.81 
  -5  -7   3   11.15    0.81 
  -5   7  -3    9.72    0.90 
   5   7   3   10.29    0.93 
   5  -7  -3    8.92    0.85 
  -6   7   3    6.26    0.85 
   6  -7   3    4.62    0.72 
  -6  -7  -3    6.96    0.80 
   6   7  -3    5.97    0.83 
  -6  -7   3    6.09    0.68 
  -6  -7   3    6.20    0.75 
  -6   7  -3    6.17    0.84 
   6   7   3    5.60    0.81 
   6  -7  -3    6.24    0.83 
  -7  -7  -3    1.81    0.59 
   7   7  -3    2.34    0.64 
  -7   7   3    2.08    0.56 
   7  -7   3    1.85    0.59 
  -7   7  -3    1.63    0.62 
  -7  -7   3    2.50    0.62 
   7   7   3    1.38    0.57 
   7  -7  -3    2.15    0.62 
   0   8  -3    0.71    0.35 
   0   8   3    1.49    0.43 
   0  -8   3    1.14    0.39 
   0  -8  -3    1.36    0.38 
  -1   8   3   13.25    0.89 
  -1  -8  -3   12.86    0.86 
  -1   8   3   13.06    0.95 
  -1  -8  -3   11.43    0.81 
   1  -8   3   12.98    0.91 
   1   8  -3   12.76    0.91 
   1  -8  -3   12.87    0.85 
  -1   8  -3   13.45    0.90 
  -1   8  -3   12.77    0.86 
  -1  -8   3   14.91    0.94 
   1   8   3   13.90    0.96 
   2   8  -3    2.94    0.57 
  -2   8   3    2.54    0.54 
  -2  -8  -3    3.20    0.54 
   2  -8   3    1.20    0.42 
  -2  -8   3    2.47    0.51 
  -2   8  -3    1.74    0.47 
   2  -8  -3    2.36    0.48 
   2   8   3    1.68    0.48 
  -2   8  -3    2.25    0.45 
   3   8  -3   11.07    0.94 
   3  -8   3    9.97    0.86 
  -3   8   3   12.77    0.97 
  -3  -8  -3   11.14    0.90 
   3   8   3   11.85    0.96 
  -3  -8   3   12.15    0.87 
  -3   8  -3    9.71    0.86 
   3  -8  -3    9.46    0.81 
  -3  -8   3   10.96    1.05 
   4  -8   3    0.05    0.32 
   4   8  -3   -0.12    0.35 
  -4   8   3   -0.01    0.30 
  -4  -8  -3   -0.14    0.29 
  -4  -8   3    0.88    0.36 
   4   8   3   -0.18    0.36 
   4  -8  -3   -0.01    0.35 
  -4   8  -3    0.73    0.45 
  -4  -8   3    0.12    0.31 
  -5   8   3    0.55    0.45 
   5  -8   3    1.78    0.49 
  -5  -8  -3    0.12    0.39 
   5   8  -3    1.38    0.49 
  -5  -8   3    0.74    0.43 
   5  -8  -3    1.06    0.42 
   5   8   3    0.93    0.47 
  -5   8  -3    0.51    0.46 
  -5  -8   3    0.38    0.33 
   6   8  -3    0.70    0.59 
  -6   8   3    0.29    0.48 
   6  -8   3    0.46    0.65 
  -6  -8  -3    0.24    0.39 
  -6  -8   3    0.44    0.41 
  -6   8  -3    0.29    0.50 
   6   8   3   -0.13    0.65 
   6  -8  -3    0.70    0.45 
   0   9  -3    0.58    0.38 
   0   9   3    0.72    0.40 
   0  -9  -3    0.78    0.38 
   0  -9   3    0.82    0.40 
   1  -9   3    3.18    0.60 
   1   9  -3    1.96    0.52 
   1  -9  -3    3.04    0.58 
  -1   9  -3    1.71    0.46 
   1   9   3    1.96    0.54 
  -1  -9   3    1.93    0.48 
   2  -9   3    0.20    0.37 
  -2   9   3    1.66    0.53 
   2   9  -3    2.02    0.57 
   2  -9  -3    0.98    0.42 
   2   9   3    1.55    0.50 
  -2  -9   3    1.31    0.42 
  -2   9  -3    1.76    0.51 
   3  -9   3   14.01    1.05 
  -3  -9  -3   13.36    1.03 
   3   9  -3   12.79    1.09 
  -3   9   3   16.38    1.14 
   3   9   3   13.43    1.09 
  -3  -9   3   13.49    0.98 
  -3   9  -3   14.87    1.11 
   3  -9  -3   11.47    0.99 
  -4  -9  -3    4.05    0.70 
   4   9  -3    4.15    0.74 
  -4   9   3    4.10    0.72 
   4  -9   3    3.92    0.70 
  -4  -9   3    4.28    0.68 
   4  -9  -3    3.98    0.71 
  -4   9  -3    3.35    0.71 
   4   9   3    5.01    0.81 
  -5  -9  -3    1.56    0.55 
   0 -10   3   37.19    1.71 
   0  10  -3   33.61    1.65 
   1  10  -3    9.59    1.02 
   1 -10   3    9.18    0.94 
  -1 -10   3   10.66    1.03 
   1  10   3    8.38    0.92 
   1 -10  -3    9.24    0.90 
   2  10  -3   11.01    1.05 
   2 -10   3   11.32    1.06 
   2  10   3   13.27    1.15 
  -2 -10   3   16.38    1.16 
   2 -10  -3   16.45    1.15 
  -3  10   3    6.29    0.89 
   3 -10  -3    6.72    1.04 
   0   0   4  330.14    6.14 
   0   0  -4  323.40    6.11 
   0   0   4  322.12    6.11 
   0   0   4  323.93    6.06 
  -1   0   4  288.41    5.60 
   1   0   4  296.49    5.60 
   1   0  -4  294.47    5.58 
  -1   0   4  294.24    5.56 
  -1   0  -4  284.86    5.59 
  -1   0   4  289.71    5.49 
   1   0   4  297.64    5.47 
  -1   0  -4  298.11    5.55 
   2   0  -4  210.03    4.24 
  -2   0   4  215.44    4.16 
  -2   0  -4  216.26    4.19 
  -2   0   4  211.10    4.26 
   2   0   4  213.26    4.13 
   2   0  -4  220.22    4.09 
   2   0   4  212.65    4.23 
  -2   0  -4  213.36    4.23 
  -3   0   4    1.42    0.25 
  -3   0   4    1.73    0.22 
  -3   0  -4    1.00    0.19 
   3   0  -4    1.53    0.20 
   3   0  -4    0.73    0.19 
   3   0   4    1.49    0.22 
  -3   0  -4    1.41    0.23 
   3   0   4    1.45    0.23 
   4   0   4   22.41    0.80 
  -4   0   4   22.17    0.86 
   4   0   4   23.01    0.80 
  -4   0   4   23.36    0.76 
  -4   0  -4   22.72    0.81 
   4   0  -4   23.61    0.71 
   4   0  -4   22.47    0.85 
  -4   0  -4   23.22    0.82 
  -5   0   4   26.39    1.04 
  -5   0  -4   24.43    0.95 
  -5   0   4   26.62    0.90 
   5   0   4   26.07    0.95 
  -5   0  -4   25.30    0.95 
   5   0  -4   26.89    0.85 
   5   0  -4   25.43    1.02 
   5   0   4   26.68    0.97 
   6   0   4   21.50    0.92 
   6   0   4   19.04    0.90 
   6   0  -4   19.60    0.97 
  -6   0   4   20.03    0.84 
  -6   0  -4   20.59    0.91 
  -6   0  -4   20.06    0.93 
  -6   0   4   19.64    0.96 
   7   0   4   16.19    0.88 
  -7   0   4   16.15    0.94 
  -7   0  -4   14.84    0.85 
  -7   0  -4   16.36    0.90 
   7   0  -4   17.34    0.99 
   7   0   4   15.74    0.85 
   8   0  -4   18.84    1.13 
  -8   0   4   20.18    1.16 
  -8   0  -4   21.31    1.11 
   8   0   4   21.07    1.09 
  -9   0  -4   21.76    1.24 
  -9   0   4   22.47    1.30 
   9   0  -4   21.92    1.29 
   9   0   4   22.98    1.26 
 -10   0   4    6.60    0.93 
  10   0  -4    5.48    0.86 
   0   1   4   35.66    0.87 
   0  -1   4   35.63    0.86 
   0   1  -4   36.55    0.84 
   0   1   4   36.23    0.82 
   0  -1   4   35.39    0.84 
   0  -1   4   36.13    0.77 
   0  -1  -4   37.11    0.76 
   1  -1   4  290.90    5.55 
   1  -1   4  290.69    5.58 
  -1   1   4  289.24    5.61 
  -1   1   4  297.19    5.40 
  -1   1   4  294.77    5.61 
  -1  -1  -4  286.22    5.60 
   1   1  -4  288.04    5.56 
  -1  -1   4  290.92    5.64 
  -1  -1   4  299.04    5.52 
  -1  -1   4  295.59    5.62 
  -1   1  -4  293.69    5.66 
   1   1   4  293.14    5.62 
   1  -1  -4  293.46    5.61 
  -1   1  -4  297.84    5.46 
   1   1   4  287.76    5.64 
  -2  -1  -4   64.30    1.49 
   2   1  -4   63.17    1.42 
  -2   1   4   62.80    1.48 
  -2  -1  -4   62.42    1.42 
   2  -1   4   61.52    1.44 
   2  -1   4   61.65    1.43 
  -2   1   4   62.24    1.47 
  -2  -1   4   61.23    1.47 
  -2   1  -4   63.85    1.32 
  -2  -1   4   63.32    1.28 
   2   1   4   62.64    1.48 
   2  -1  -4   63.76    1.47 
  -2  -1   4   61.99    1.48 
  -2   1  -4   59.14    1.47 
   2   1   4   62.16    1.30 
   3  -1   4    2.13    0.26 
  -3   1   4    2.81    0.30 
  -3  -1  -4    2.34    0.25 
   3  -1   4    2.63    0.26 
  -3   1   4    2.80    0.30 
   3   1  -4    2.12    0.26 
   3   1  -4    2.26    0.27 
  -3  -1  -4    2.53    0.30 
  -3  -1   4    2.41    0.18 
  -3   1  -4    2.62    0.24 
   3   1   4    2.12    0.22 
  -3  -1   4    2.72    0.31 
   3  -1  -4    2.39    0.15 
   3   1   4    2.46    0.30 
  -3   1  -4    2.41    0.30 
   3  -1  -4    2.43    0.31 
  -4   1   4    5.40    0.43 
   4   1  -4    4.02    0.36 
  -4   1   4    4.51    0.39 
   4  -1   4    4.35    0.39 
  -4  -1  -4    4.78    0.42 
   4  -1   4    4.83    0.37 
   4   1  -4    3.53    0.37 
  -4  -1  -4    4.66    0.35 
  -4   1  -4    4.50    0.35 
   4  -1  -4    4.21    0.40 
  -4   1  -4    4.93    0.43 
   4   1   4    4.14    0.40 
   4  -1  -4    4.39    0.25 
  -4  -1   4    5.41    0.30 
   4   1   4    5.27    0.36 
  -4  -1   4    4.65    0.42 
  -5   1   4    3.65    0.43 
  -5  -1  -4    3.43    0.38 
   5  -1   4    4.04    0.44 
   5   1  -4    3.01    0.38 
   5   1  -4    3.18    0.43 
  -5   1   4    3.04    0.38 
  -5  -1  -4    3.15    0.43 
   5  -1   4    3.87    0.39 
  -5   1  -4    2.84    0.36 
  -5  -1   4    3.06    0.31 
   5  -1  -4    3.38    0.47 
   5   1   4    3.76    0.39 
   5   1   4    3.27    0.43 
  -5  -1   4    4.62    0.50 
  -5   1  -4    3.04    0.41 
   6   1  -4   13.06    0.80 
   6  -1   4   13.08    0.79 
  -6   1   4   15.45    0.79 
  -6   1   4   14.67    0.82 
  -6  -1  -4   14.74    0.73 
   6   1  -4   13.91    0.73 
  -6  -1  -4   13.55    0.81 
   6  -1   4   14.80    0.74 
   6   1   4   14.97    0.80 
  -6  -1   4   13.48    0.83 
  -6   1  -4   15.05    0.76 
   6   1   4   16.10    0.78 
   6  -1  -4   14.81    0.86 
  -6   1  -4   14.51    0.83 
   7   1  -4   13.50    0.88 
  -7   1   4   14.75    0.90 
  -7   1   4   14.66    0.83 
   7  -1   4   16.65    0.93 
   7  -1   4   14.48    0.87 
  -7  -1  -4   13.73    0.88 
  -7  -1   4   13.43    0.90 
   7   1   4   15.20    0.84 
  -7   1  -4   15.01    0.84 
   7  -1  -4   13.91    0.92 
  -7   1  -4   15.34    0.88 
   7   1   4   15.06    0.85 
  -8   1   4    2.30    0.50 
   8   1  -4    2.42    0.49 
  -8  -1  -4    3.09    0.55 
   8  -1   4    2.34    0.51 
   8   1   4    2.60    0.48 
   8   1   4    2.76    0.49 
  -8   1  -4    2.74    0.52 
   8  -1  -4    2.92    0.57 
  -8  -1   4    2.11    0.52 
  -9  -1  -4    4.47    0.68 
   9   1  -4    4.94    0.72 
   9  -1   4    4.03    0.66 
  -9   1   4    4.21    0.68 
   9  -1  -4    3.11    0.64 
  -9  -1   4    4.14    0.70 
 -10  -1  -4    0.35    0.43 
 -10   1   4    0.77    0.50 
  10   1  -4    0.21    0.45 
   0  -2  -4  114.70    2.41 
   0  -2   4  116.95    2.24 
   0   2   4  113.13    2.40 
   0  -2   4  111.98    2.40 
   0  -2   4  111.04    2.39 
   0   2  -4  117.05    2.35 
   0   2  -4  113.23    2.41 
   0   2   4  115.42    2.34 
   0  -2  -4  116.80    2.30 
   1  -2   4   33.94    0.91 
  -1  -2  -4   33.62    0.75 
  -1   2   4   33.79    0.75 
   1  -2   4   32.89    0.88 
   1   2  -4   32.03    0.90 
  -1  -2  -4   31.93    0.93 
  -1   2   4   31.75    0.92 
   1   2  -4   33.73    0.75 
   1   2   4   32.37    0.91 
   1  -2  -4   32.65    0.90 
  -1  -2   4   33.17    0.91 
   1  -2  -4   34.04    0.88 
   1   2   4   34.10    0.88 
  -1   2  -4   32.66    0.91 
  -1  -2   4   33.93    0.86 
  -2  -2  -4  106.08    2.37 
   2  -2   4  103.47    2.32 
  -2   2   4  107.21    2.33 
   2   2  -4  107.54    2.33 
   2  -2   4  106.66    2.28 
  -2   2   4  106.65    2.37 
  -2  -2  -4  106.35    2.15 
   2  -2  -4  109.32    2.37 
   2   2   4  108.07    2.40 
  -2   2  -4  111.91    2.09 
   2   2   4  105.57    2.25 
  -2  -2   4  106.04    2.36 
  -2  -2   4  107.84    2.36 
  -2   2  -4  104.55    2.39 
  -3  -2  -4   66.62    1.75 
  -3   2   4   69.73    1.70 
   3  -2   4   69.23    1.71 
   3   2  -4   67.86    1.69 
   3  -2   4   69.93    1.64 
  -3  -2  -4   70.14    1.58 
  -3   2   4   68.01    1.75 
  -3   2  -4   65.97    1.73 
  -3  -2   4   64.60    1.70 
  -3   2  -4   68.21    1.47 
   3   2   4   65.68    1.71 
  -3  -2   4   66.94    1.68 
   3  -2  -4   67.12    1.71 
   3   2   4   71.20    1.53 
   4   2  -4   94.17    2.23 
  -4  -2  -4   97.43    2.09 
   4  -2   4   92.78    2.27 
  -4   2   4   90.66    2.23 
   4  -2   4   93.17    2.14 
   4   2  -4   89.88    2.25 
  -4  -2  -4   91.87    2.31 
  -4   2   4   92.40    2.29 
  -4   2  -4   94.89    2.08 
   4   2   4   91.68    2.31 
   4   2   4   94.95    2.12 
   4  -2  -4   93.59    2.33 
  -4  -2   4   91.35    2.33 
  -4  -2   4   95.97    1.85 
  -4   2  -4   93.07    2.33 
  -5   2   4    7.96    0.58 
  -5  -2  -4    9.37    0.51 
   5  -2   4    9.50    0.63 
   5   2  -4    9.26    0.60 
  -5  -2  -4    8.54    0.65 
   5   2  -4    9.47    0.63 
   5  -2   4    9.73    0.54 
  -5   2   4    9.16    0.63 
   5   2   4   10.65    0.68 
   5  -2  -4    9.45    0.68 
  -5   2  -4   10.59    0.71 
  -5   2  -4   10.56    0.55 
  -5  -2   4    8.82    0.65 
   5   2   4   10.66    0.57 
  -6   2   4    3.92    0.50 
   6  -2   4    4.91    0.57 
  -6   2   4    2.82    0.45 
   6  -2   4    3.94    0.43 
   6   2  -4    4.46    0.57 
  -6  -2  -4    4.51    0.57 
   6   2  -4    4.31    0.53 
   6   2   4    4.74    0.55 
   6  -2  -4    4.53    0.59 
  -6   2  -4    4.49    0.45 
  -6   2  -4    3.53    0.55 
   6   2   4    4.80    0.49 
  -6  -2   4    5.18    0.55 
  -7   2   4   27.80    1.22 
   7  -2   4   29.46    1.27 
   7   2  -4   28.65    1.21 
  -7   2   4   29.20    1.24 
  -7  -2  -4   30.17    1.33 
   7   2  -4   29.29    1.27 
   7  -2  -4   29.76    1.34 
  -7   2  -4   27.23    1.27 
  -7  -2   4   29.91    1.35 
   7   2   4   31.20    1.20 
   7   2   4   28.27    1.24 
   8   2  -4    0.03    0.30 
  -8  -2  -4    0.10    0.31 
  -8   2   4    0.05    0.29 
  -8   2   4    0.23    0.31 
   8  -2   4    0.48    0.36 
  -8   2  -4    0.49    0.36 
   8  -2  -4    0.67    0.42 
   8   2   4   -0.06    0.28 
  -8  -2   4    0.07    0.34 
   9   2  -4    3.97    0.66 
  -9   2   4    3.53    0.63 
  -9  -2  -4    3.87    0.68 
   9  -2   4    3.08    0.62 
  -9   2  -4    3.59    0.64 
  -9  -2   4    2.94    0.62 
   9  -2  -4    3.21    0.64 
  10   2  -4    4.66    0.78 
  10  -2   4    4.82    0.79 
   0  -3   4  277.67    5.72 
   0  -3  -4  295.56    5.62 
   0  -3   4  293.48    5.52 
   0   3  -4  287.42    5.73 
   0  -3  -4  289.30    5.72 
   0   3   4  292.11    5.66 
   0   3   4  284.42    5.72 
   0   3  -4  295.83    5.64 
   1   3  -4   16.42    0.64 
  -1  -3  -4   16.05    0.52 
  -1   3   4   16.38    0.66 
   1  -3   4   15.53    0.60 
   1   3  -4   16.89    0.50 
  -1  -3  -4   16.40    0.64 
   1  -3   4   16.14    0.64 
  -1   3   4   15.49    0.52 
   1  -3   4   16.92    0.41 
  -1   3  -4   16.34    0.64 
   1   3   4   15.55    0.57 
   1  -3  -4   16.14    0.61 
   1   3   4   16.85    0.65 
   1  -3  -4   16.41    0.60 
  -1  -3   4   16.21    0.57 
   2  -3   4    7.43    0.40 
  -2   3   4    6.34    0.28 
  -2   3   4    8.75    0.50 
   2   3  -4    7.03    0.46 
   2  -3   4    6.71    0.43 
  -2  -3  -4    6.64    0.33 
   2  -3   4    6.93    0.23 
  -2  -3  -4    5.85    0.44 
   2   3  -4    7.28    0.21 
   2   3   4    6.31    0.35 
   2  -3  -4    7.55    0.43 
  -2   3  -4    6.80    0.48 
   2  -3  -4    7.39    0.46 
  -2  -3   4    7.38    0.43 
  -2  -3   4    7.67    0.45 
   2   3   4    6.28    0.46 
  -3  -3  -4   49.98    1.49 
  -3  -3  -4   53.21    1.27 
  -3   3   4   49.93    1.38 
   3  -3   4   51.76    1.35 
  -3   3   4   52.23    1.08 
  -3   3   4   51.25    1.50 
   3   3  -4   50.56    1.44 
   3  -3   4   50.94    1.45 
  -3  -3   4   50.07    1.44 
   3   3   4   51.60    1.26 
   3  -3  -4   50.39    1.46 
  -3   3  -4   52.91    1.15 
   3   3   4   50.93    1.49 
  -3   3  -4   50.92    1.50 
  -3  -3   4   51.71    1.44 
   4  -3   4   14.23    0.74 
  -4  -3  -4   14.38    0.79 
   4   3  -4   15.15    0.76 
  -4  -3  -4   15.80    0.58 
  -4   3   4   14.90    0.70 
   4  -3   4   15.43    0.64 
  -4   3   4   15.48    0.78 
  -4   3  -4   14.14    0.76 
  -4  -3   4   13.16    0.70 
  -4  -3   4   13.21    0.73 
   4  -3  -4   12.56    0.72 
   4   3   4   14.98    0.60 
  -4   3  -4   14.30    0.53 
   4   3   4   13.73    0.77 
   5   3  -4   14.69    0.77 
   5  -3   4   13.67    0.79 
  -5   3   4   14.35    0.83 
  -5   3   4   13.64    0.73 
   5   3  -4   14.68    0.81 
   5  -3   4   13.30    0.64 
  -5  -3  -4   13.12    0.82 
  -5   3  -4   14.08    0.86 
   5   3   4   14.31    0.66 
  -5  -3   4   14.07    0.82 
   5   3   4   14.37    0.84 
   5  -3  -4   13.36    0.83 
   6  -3   4   13.41    0.84 
  -6  -3  -4   12.80    0.87 
  -6   3   4   13.39    0.82 
  -6   3   4   13.29    0.76 
   6   3  -4   12.18    0.80 
   6   3  -4   14.26    0.81 
   6  -3  -4   12.64    0.87 
   6   3   4   13.81    0.72 
  -6   3  -4   13.25    0.89 
   6   3   4   13.36    0.87 
  -6  -3   4   11.59    0.82 
   7  -3   4    1.70    0.42 
   7   3  -4    1.97    0.44 
   7   3  -4    1.39    0.41 
  -7   3   4    1.45    0.43 
  -7   3   4    2.14    0.42 
  -7  -3  -4    1.85    0.48 
   7   3   4    2.28    0.48 
  -7  -3   4    1.87    0.49 
  -7   3  -4    1.28    0.44 
   7  -3  -4    1.26    0.45 
  -8   3   4   12.19    0.98 
   8  -3   4   11.82    0.93 
   8   3  -4   13.46    0.94 
  -8   3   4   12.36    0.92 
  -8  -3  -4   12.60    1.00 
   8   3   4   12.10    0.92 
   8  -3  -4   11.92    0.99 
  -8   3  -4   11.70    0.97 
  -8  -3   4   11.40    0.96 
   9   3  -4   13.07    1.03 
   9  -3   4   13.63    1.06 
  -9  -3  -4   13.05    1.09 
  -9   3  -4   13.16    1.08 
   9   3   4   14.09    1.04 
   9  -3  -4   12.16    1.08 
  -9  -3   4   14.15    1.14 
   0   4   4   69.40    1.75 
   0  -4   4   72.20    1.58 
   0   4   4   70.03    1.71 
   0   4  -4   67.56    1.77 
   0  -4  -4   71.36    1.69 
   0   4  -4   70.32    1.70 
   0  -4   4   70.16    1.78 
   0  -4  -4   69.25    1.76 
  -1  -4  -4   36.97    1.16 
  -1   4   4   36.86    1.02 
   1  -4   4   38.37    0.88 
  -1  -4  -4   36.23    1.02 
   1  -4   4   37.59    1.16 
   1   4  -4   37.81    0.98 
  -1   4   4   37.69    1.17 
   1   4  -4   36.36    1.14 
  -1  -4   4   37.16    1.04 
  -1   4  -4   35.72    1.12 
   1  -4  -4   37.41    1.10 
   1   4   4   35.23    1.04 
   1   4   4   38.06    1.15 
  -1  -4   4   35.92    1.12 
  -1   4  -4   35.87    1.10 
   1  -4  -4   38.58    1.11 
   2  -4   4   73.61    1.94 
   2  -4   4   76.86    1.54 
  -2   4   4   72.31    1.96 
   2   4  -4   71.81    1.93 
   2  -4   4   74.89    1.84 
   2   4  -4   76.42    1.56 
  -2  -4  -4   74.18    1.95 
  -2   4   4   76.04    1.68 
  -2  -4  -4   76.75    1.75 
  -2  -4   4   76.16    1.87 
  -2  -4   4   70.32    1.87 
   2   4   4   74.06    1.73 
  -2   4  -4   71.03    1.92 
   2  -4  -4   75.68    1.89 
   2   4   4   76.73    1.96 
   2  -4  -4   74.62    1.84 
   3   4  -4   35.37    1.21 
   3  -4   4   33.99    1.07 
  -3  -4  -4   33.86    1.00 
  -3  -4  -4   33.10    1.21 
   3  -4   4   33.26    1.18 
  -3   4   4   35.95    0.87 
  -3   4   4   32.05    1.20 
  -3   4  -4   34.36    1.22 
   3  -4  -4   32.84    1.17 
   3  -4  -4   33.84    1.08 
   3   4   4   33.10    1.21 
   3   4   4   34.31    0.95 
  -3  -4   4   34.30    1.16 
  -3  -4   4   34.40    1.15 
  -4  -4  -4   11.70    0.76 
  -4   4   4   11.62    0.78 
   4  -4   4   12.44    0.61 
   4  -4   4   12.41    0.74 
  -4   4   4   11.96    0.65 
   4   4  -4   13.59    0.78 
  -4  -4  -4   11.85    0.59 
  -4   4  -4   11.45    0.76 
  -4  -4   4   11.30    0.67 
   4  -4  -4   12.15    0.76 
  -4  -4   4   12.10    0.74 
   4   4   4   12.10    0.79 
   5   4  -4   17.26    0.93 
   5  -4   4   16.20    0.75 
  -5   4   4   15.63    0.91 
  -5   4   4   16.56    0.81 
   5  -4   4   15.43    0.90 
  -5  -4  -4   16.26    0.94 
  -5  -4   4   15.80    0.84 
   5   4   4   16.12    0.73 
  -5   4  -4   15.04    0.92 
  -5  -4   4   17.07    0.93 
   5  -4  -4   16.34    0.92 
   5   4   4   16.21    0.95 
   6   4  -4    2.27    0.44 
   6   4  -4    2.27    0.49 
  -6   4   4    1.75    0.46 
  -6   4   4    2.32    0.42 
  -6  -4  -4    2.59    0.50 
   6  -4   4    2.92    0.51 
   6   4   4    2.50    0.48 
  -6  -4   4    2.13    0.48 
   6  -4  -4    2.57    0.49 
  -6   4  -4    2.40    0.52 
  -7   4   4    3.70    0.62 
  -7  -4  -4    4.28    0.66 
   7   4  -4    3.25    0.58 
   7   4  -4    4.10    0.57 
   7  -4   4    4.17    0.62 
  -7   4  -4    3.28    0.60 
   7  -4  -4    3.31    0.62 
   7   4   4    3.67    0.62 
  -7  -4   4    3.38    0.60 
   8   4  -4    5.88    0.75 
   8  -4   4    6.02    0.74 
  -8   4   4    5.57    0.75 
  -8  -4  -4    5.46    0.81 
   8   4  -4    5.74    0.68 
  -8  -4   4    5.96    0.81 
  -8   4  -4    6.42    0.84 
   8  -4  -4    6.45    0.84 
   8   4   4    6.14    0.81 
  -9  -4  -4    4.73    0.80 
   9  -4   4    5.37    0.81 
   9   4  -4    6.63    0.81 
  -9   4   4    7.87    0.88 
   9  -4  -4    6.09    1.05 
  -9   4  -4    7.34    0.92 
   9   4   4    7.60    0.89 
   0   5   4    3.17    0.39 
   0   5  -4    2.90    0.39 
   0   5   4    3.38    0.41 
   0  -5   4    4.00    0.43 
   0  -5  -4    3.27    0.41 
   0   5  -4    3.95    0.41 
   0  -5  -4    3.20    0.37 
   0  -5   4    3.29    0.31 
  -1  -5  -4   35.33    1.23 
  -1  -5  -4   36.33    1.11 
   1  -5   4   37.67    1.26 
   1   5  -4   37.83    1.06 
   1  -5   4   38.17    0.96 
  -1   5   4   35.07    1.23 
   1   5  -4   36.81    1.26 
  -1   5   4   36.81    1.11 
  -1  -5   4   36.61    1.22 
   1  -5  -4   36.91    1.18 
   1   5   4   36.85    1.24 
   1   5   4   37.02    1.14 
  -1   5  -4   36.44    1.20 
   1  -5  -4   37.47    1.20 
  -1  -5   4   38.42    1.12 
  -1   5  -4   38.19    1.23 
  -2  -5  -4    5.30    0.53 
   2   5  -4    5.11    0.53 
  -2  -5  -4    5.82    0.42 
   2  -5   4    5.44    0.52 
  -2   5   4    5.61    0.40 
  -2   5   4    5.82    0.56 
   2  -5  -4    5.76    0.52 
  -2   5  -4    5.43    0.44 
  -2  -5   4    5.85    0.50 
   2   5   4    5.68    0.41 
   2   5   4    5.53    0.56 
  -2  -5   4    5.50    0.47 
   2  -5  -4    5.72    0.45 
  -2   5  -4    5.87    0.57 
  -3  -5  -4    4.86    0.41 
   3  -5   4    4.71    0.54 
   3   5  -4    4.55    0.55 
  -3  -5  -4    4.74    0.57 
  -3   5   4    4.45    0.55 
  -3   5  -4    5.15    0.60 
   3   5   4    5.68    0.60 
   3  -5  -4    5.07    0.45 
  -3   5  -4    4.63    0.43 
  -3  -5   4    4.79    0.49 
   3  -5  -4    5.46    0.56 
  -3  -5   4    5.02    0.49 
   4   5  -4   44.24    1.58 
  -4   5   4   45.12    1.64 
   4  -5   4   42.83    1.54 
  -4  -5  -4   44.65    1.36 
   4  -5   4   47.99    1.40 
  -4  -5  -4   47.11    1.63 
  -4  -5   4   47.58    1.59 
  -4   5  -4   47.61    1.65 
   4   5   4   44.02    1.61 
   4  -5  -4   46.59    1.43 
  -4  -5   4   44.38    1.51 
   4  -5  -4   48.63    1.60 
  -5  -5  -4    3.66    0.56 
   5   5  -4    5.43    0.64 
  -5   5   4    5.53    0.66 
   5  -5   4    3.52    0.55 
  -5  -5   4    5.21    0.59 
   5   5   4    3.64    0.58 
   5  -5  -4    4.06    0.48 
  -5  -5   4    4.35    0.51 
   5  -5  -4    5.13    0.62 
  -5   5  -4    3.73    0.59 
   6  -5   4   11.53    0.88 
  -6  -5  -4    9.86    0.85 
   6   5  -4    9.31    0.82 
   6   5  -4   10.60    0.77 
  -6   5   4    9.76    0.81 
  -6  -5   4    9.84    0.83 
   6   5   4    9.07    0.85 
   6  -5  -4    9.86    0.84 
  -6   5  -4   10.24    0.89 
  -7  -5  -4    6.17    0.78 
  -7   5   4    6.93    0.81 
   7  -5   4    6.83    0.78 
   7   5  -4    8.47    0.88 
   7   5  -4    6.08    0.70 
   7   5   4    6.49    0.78 
  -7  -5   4    7.48    0.80 
   7  -5  -4    7.09    0.81 
  -7   5  -4    7.77    0.86 
  -8  -5  -4    1.19    0.51 
   8   5  -4    1.09    0.52 
   8  -5   4    0.87    0.49 
   8   5  -4    0.66    0.39 
  -8   5   4    0.45    0.44 
   8   5   4    1.22    0.51 
   8  -5  -4    0.51    0.43 
  -8  -5   4    1.12    0.48 
  -8   5  -4    0.25    0.44 
   0   6   4    5.90    0.53 
   0  -6   4    5.56    0.54 
   0  -6  -4    6.03    0.51 
   0   6  -4    4.89    0.51 
   0  -6  -4    5.14    0.53 
   0   6   4    5.66    0.53 
   0   6  -4    6.20    0.53 
  -1   6   4    7.60    0.57 
   1  -6   4    7.25    0.60 
  -1  -6  -4    7.73    0.54 
   1   6  -4    7.01    0.62 
  -1  -6  -4    7.12    0.60 
  -1   6   4    7.86    0.62 
   1  -6  -4    8.39    0.60 
  -1   6  -4    7.15    0.63 
  -1   6  -4    7.43    0.57 
  -1  -6   4    7.17    0.59 
   1  -6  -4    7.47    0.57 
   1   6   4    7.17    0.52 
  -1  -6   4    8.90    0.55 
   1   6   4    7.19    0.62 
   2  -6   4   26.31    1.14 
   2   6  -4   26.34    1.14 
  -2  -6  -4   27.59    1.16 
  -2   6   4   27.43    1.19 
  -2   6   4   29.59    0.99 
  -2  -6  -4   28.03    1.01 
  -2  -6   4   29.28    1.07 
  -2   6  -4   28.56    1.08 
   2   6   4   25.68    1.15 
   2  -6  -4   25.50    1.01 
   2  -6  -4   27.96    1.13 
  -2  -6   4   27.28    1.12 
  -2   6  -4   26.36    1.15 
   3  -6   4   11.31    0.78 
  -3   6   4   12.33    0.85 
  -3  -6  -4   14.02    0.69 
  -3  -6  -4   11.74    0.83 
   3   6  -4   10.86    0.78 
  -3   6  -4   12.25    0.86 
  -3   6  -4   13.11    0.72 
  -3  -6   4   13.52    0.79 
   3   6   4   13.72    0.90 
  -3  -6   4   13.00    0.80 
   3  -6  -4   13.60    0.73 
   3  -6  -4   13.64    0.83 
  -4   6   4   18.43    1.06 
   4   6  -4   17.98    1.03 
  -4  -6  -4   17.92    1.03 
   4  -6   4   18.93    1.04 
   4  -6  -4   18.10    1.00 
  -4   6  -4   16.08    1.02 
   4   6   4   18.72    1.06 
  -4  -6   4   19.77    0.98 
  -4  -6   4   18.63    0.99 
  -4   6  -4   18.86    0.88 
  -5   6   4   10.15    0.86 
   5   6  -4   10.08    0.85 
  -5  -6  -4   10.00    0.85 
   5  -6   4    9.25    0.80 
   5  -6  -4    9.85    0.83 
  -5  -6   4    9.43    0.72 
  -5   6  -4    8.83    0.85 
  -5  -6   4   10.41    0.82 
   5   6   4   10.56    0.90 
  -6  -6  -4    3.76    0.63 
   6  -6   4    3.08    0.59 
   6   6  -4    3.01    0.59 
  -6   6   4    4.17    0.67 
  -6   6  -4    3.94    0.67 
  -6  -6   4    3.75    0.61 
   6  -6  -4    3.42    0.60 
   6   6   4    2.95    0.63 
  -6  -6   4    3.10    0.55 
   7   6  -4    0.65    0.34 
  -7  -6  -4    0.93    0.45 
   7  -6   4    0.94    0.45 
  -7   6   4    1.14    0.47 
   7   6  -4    1.40    0.52 
   7  -6  -4    1.06    0.48 
   7   6   4    0.76    0.49 
  -7   6  -4    1.17    0.53 
  -7  -6   4    1.49    0.47 
   8   6  -4    1.92    0.56 
   8   6  -4    2.01    0.61 
  -8   6   4    1.15    0.57 
   8   6   4    1.55    0.68 
   0   7  -4    0.02    0.25 
   0  -7   4   -0.01    0.24 
   0   7   4    0.33    0.27 
   0  -7  -4    0.13    0.27 
   0   7   4    0.25    0.25 
   0  -7  -4    0.12    0.21 
   1  -7   4    2.81    0.50 
   1   7  -4    2.44    0.45 
  -1  -7  -4    2.83    0.41 
  -1   7   4    1.73    0.37 
  -1  -7  -4    1.17    0.38 
  -1   7   4    3.00    0.49 
  -1   7  -4    1.53    0.39 
  -1  -7   4    1.72    0.39 
   1  -7  -4    1.77    0.39 
  -1   7  -4    1.75    0.39 
   1  -7  -4    2.44    0.42 
   1   7   4    2.47    0.47 
  -2  -7  -4   22.98    0.98 
   2  -7   4   22.80    1.13 
  -2   7   4   22.26    1.12 
  -2  -7  -4   22.71    1.09 
   2   7  -4   21.51    1.13 
  -2  -7   4   21.60    0.97 
  -2  -7   4   21.07    1.05 
  -2   7  -4   19.86    1.05 
   2   7   4   20.78    1.09 
  -2   7  -4   20.82    1.00 
   2  -7  -4   21.42    1.05 
  -3   7   4   12.12    0.90 
   3  -7   4   10.95    0.84 
   3   7  -4   11.91    0.89 
  -3  -7  -4   12.86    0.88 
  -3   7  -4   12.23    0.76 
   3   7   4   12.12    0.91 
   3  -7  -4   11.76    0.83 
  -3   7  -4   11.50    0.89 
  -3  -7   4   11.62    0.80 
  -3  -7   4   11.56    0.80 
  -4  -7  -4    6.17    0.73 
  -4   7   4    6.07    0.73 
   4  -7   4    5.76    0.68 
   4   7  -4    4.26    0.65 
  -4  -7   4    5.05    0.61 
  -4   7  -4    5.51    0.72 
   4   7   4    4.94    0.68 
  -4  -7   4    5.53    0.63 
   4  -7  -4    4.89    0.65 
   5   7  -4    0.81    0.47 
  -5   7   4    1.21    0.44 
   5  -7   4    1.75    0.49 
  -5  -7  -4    1.28    0.45 
   5   7   4    1.25    0.48 
   5  -7  -4    2.21    0.52 
  -5   7  -4    0.98    0.49 
  -5  -7   4    1.22    0.42 
  -5  -7   4    1.29    0.39 
   6  -7   4    0.84    0.44 
  -6  -7  -4    1.19    0.46 
  -6   7   4    0.93    0.46 
   6   7  -4    0.74    0.45 
  -6   7  -4   -0.18    0.40 
   6   7   4    0.36    0.42 
   6  -7  -4    0.89    0.46 
  -6  -7   4    0.34    0.32 
  -6  -7   4    0.12    0.34 
   7   7  -4   11.08    0.94 
  -7  -7  -4   10.15    1.03 
  -7   7   4   10.20    1.15 
   7  -7   4    8.74    0.98 
   7   7  -4    9.88    1.03 
  -7   7  -4    8.72    1.23 
   7  -7  -4   11.52    1.12 
   7   7   4   11.37    1.13 
  -7  -7   4   11.36    1.07 
   0   8   4   12.58    0.85 
   0  -8   4   10.35    0.82 
   0  -8  -4   13.51    0.85 
   0   8   4   11.63    0.95 
   0   8  -4   11.27    0.83 
   0  -8  -4   12.63    0.81 
   1   8  -4    2.23    0.49 
  -1  -8  -4    0.86    0.37 
   1  -8   4    0.72    0.38 
  -1  -8  -4    1.16    0.40 
  -1   8   4    1.42    0.43 
  -1  -8   4    0.59    0.35 
  -1   8  -4    1.20    0.66 
  -1   8  -4    0.87    0.34 
   1   8   4    1.26    0.44 
   1  -8  -4    1.15    0.36 
  -2  -8  -4   16.86    1.02 
   2   8  -4   17.42    1.09 
   2  -8   4   17.87    1.06 
  -2   8   4   15.73    1.03 
   2   8   4   16.68    1.05 
  -2   8  -4   18.36    0.99 
  -2   8  -4   17.55    1.05 
  -2  -8   4   16.61    1.00 
   2  -8  -4   17.68    1.03 
  -3   8   4   16.52    1.08 
   3  -8   4   15.06    1.03 
   3   8  -4   16.88    1.11 
  -3  -8  -4   14.88    1.01 
  -3  -8   4   16.86    1.01 
  -3   8  -4   15.33    1.03 
   3  -8  -4   17.66    1.06 
   3   8   4   15.06    1.06 
  -4  -8  -4    4.41    0.70 
   4  -8   4    4.63    0.71 
  -4   8   4    4.28    0.69 
   4   8  -4    4.17    0.66 
  -4   8  -4    3.79    0.66 
  -4  -8   4    3.80    0.61 
   4   8   4    5.29    0.77 
  -4  -8   4    3.78    0.61 
   4  -8  -4    5.20    0.71 
  -5  -8  -4   11.23    1.02 
   5   8  -4   11.25    1.05 
  -5   8   4   11.47    1.05 
   5  -8   4   11.73    0.99 
  -5  -8   4   12.51    0.94 
  -5   8  -4   13.36    1.10 
   5   8   4    9.81    1.02 
  -5  -8   4   11.71    0.96 
   5  -8  -4    9.50    0.94 
  -6  -8  -4    1.26    0.53 
   6   8  -4    0.85    0.85 
  -6   8  -4    0.09    0.67 
   6  -8  -4    0.06    0.43 
  -6  -8   4    0.72    0.46 
   0   9   4   17.26    1.57 
   0   9  -4   15.37    1.04 
   0  -9   4   15.03    1.06 
  -1   9   4   22.96    1.87 
   1  -9   4   26.19    1.35 
   1   9  -4   22.24    1.27 
   1  -9  -4   24.90    1.24 
  -1   9  -4   24.09    1.25 
  -1  -9   4   24.54    1.30 
   1   9   4   21.52    1.24 
   2  -9   4    0.25    0.37 
  -2  -9  -4    0.50    0.39 
   2   9  -4    0.77    0.41 
  -2   9   4    0.72    0.41 
   2  -9  -4    0.66    0.40 
  -2  -9   4    0.54    0.37 
   2   9   4    0.86    0.46 
   3   9  -4    4.62    0.74 
   3  -9   4    5.28    0.76 
  -3  -9  -4    4.01    0.67 
  -3   9   4    4.39    0.74 
   3   9   4    5.13    0.77 
   3  -9  -4    5.39    0.76 
  -3   9  -4    4.77    0.77 
  -3  -9   4    4.51    0.69 
   4  -9   4   17.62    1.22 
  -4  -9  -4   18.54    1.22 
   4   9  -4   17.99    1.30 
  -4   9   4   18.43    1.29 
  -4  -9   4   19.97    1.20 
   4  -9  -4   20.92    1.27 
   4   9   4   18.96    1.34 
  -4   9  -4   17.73    1.27 
  -5  -9  -4    4.41    0.81 
   0 -10   4    4.27    0.72 
   0  10  -4    3.51    0.66 
   1 -10   4    2.39    0.60 
   1  10  -4    2.36    0.55 
  -1 -10   4    2.30    0.64 
  -1  10  -4    2.69    0.66 
   1  10   4    2.85    0.68 
   2 -10   4    5.73    1.27 
   2  10  -4    5.48    0.89 
  -2 -10   4    5.03    0.79 
   2  10   4    6.39    0.92 
   2 -10  -4    5.52    0.79 
  -3  10   4    0.18    0.45 
  -3 -10   4    0.79    0.48 
   3 -10  -4    1.14    0.49 
   0   0   5   -0.07    0.08 
   0   0   5   -0.03    0.08 
   0   0   5   -0.12    0.06 
   0   0  -5   -0.05    0.07 
   1   0   5   38.86    0.82 
  -1   0   5   38.20    0.95 
  -1   0   5   39.75    0.86 
   1   0  -5   37.48    0.92 
  -1   0  -5   38.39    0.90 
   1   0   5   38.36    0.95 
  -1   0   5   39.20    0.92 
   2   0  -5   77.97    1.78 
  -2   0   5   83.11    1.73 
   2   0   5   79.23    1.66 
  -2   0   5   79.91    1.82 
  -2   0  -5   80.01    1.79 
   2   0   5   77.01    1.78 
  -2   0  -5   78.79    1.73 
   2   0  -5   82.30    1.64 
  -3   0   5  113.97    2.58 
   3   0   5  115.53    2.42 
  -3   0  -5  114.95    2.53 
  -3   0  -5  115.26    2.48 
   3   0   5  113.88    2.53 
  -3   0   5  116.06    2.43 
   3   0  -5  116.61    2.35 
   4   0   5  180.01    3.73 
  -4   0   5  179.36    3.70 
  -4   0  -5  177.44    3.80 
  -4   0   5  178.13    3.88 
   4   0   5  179.99    3.82 
   4   0  -5  171.74    3.84 
   4   0  -5  185.26    3.62 
  -4   0  -5  181.71    3.80 
  -5   0   5   52.77    1.42 
   5   0  -5   55.19    1.35 
   5   0  -5   50.91    1.59 
  -5   0  -5   52.70    1.52 
  -5   0   5   51.42    1.59 
   5   0   5   50.86    1.51 
   5   0   5   53.74    1.48 
  -5   0  -5   52.07    1.52 
  -6   0  -5   85.64    2.28 
  -6   0  -5   86.66    2.27 
  -6   0   5   86.53    2.39 
  -6   0   5   87.85    2.15 
   6   0   5   87.04    2.25 
   6   0  -5   83.77    2.36 
   6   0   5   83.89    2.24 
   7   0   5    8.26    0.65 
  -7   0  -5    9.23    0.71 
   7   0  -5    8.10    0.73 
  -7   0   5    8.66    0.73 
  -7   0  -5    7.43    0.64 
   7   0   5    8.47    0.65 
   8   0  -5   18.66    1.13 
   8   0   5   20.90    1.07 
  -8   0   5   18.56    1.11 
  -8   0  -5   17.93    1.03 
  -9   0   5   -0.17    0.32 
   9   0  -5    0.10    0.37 
 -10   0   5    1.07    0.53 
   0  -1  -5  376.32    6.85 
   0   1   5  367.64    7.02 
   0  -1   5  362.49    6.99 
   0   1   5  362.62    6.93 
   0  -1   5  369.60    6.96 
   0  -1  -5  360.10    7.01 
   0  -1   5  373.36    6.89 
   0   1  -5  370.14    6.96 
   1  -1   5  242.94    4.68 
  -1   1   5  243.02    4.76 
  -1  -1  -5  245.73    4.75 
   1  -1   5  239.83    4.74 
  -1   1   5  236.39    4.75 
   1   1  -5  243.57    4.70 
  -1   1   5  248.48    4.55 
  -1  -1   5  234.63    4.67 
  -1  -1   5  240.01    4.57 
   1   1   5  238.97    4.69 
  -1   1  -5  245.86    4.50 
   1   1   5  239.06    4.68 
  -1  -1   5  243.02    4.66 
  -1   1  -5  236.46    4.70 
   1  -1  -5  242.41    4.64 
   2  -1   5   57.98    1.36 
   2   1  -5   56.33    1.30 
  -2  -1  -5   55.29    1.37 
  -2   1   5   54.19    1.37 
  -2   1   5   56.15    1.37 
  -2  -1  -5   56.67    1.34 
   2  -1   5   56.93    1.31 
   2  -1  -5   56.85    1.39 
  -2  -1   5   59.90    1.23 
  -2  -1   5   57.54    1.40 
   2   1   5   56.67    1.41 
  -2   1  -5   57.85    1.24 
  -2   1  -5   57.78    1.42 
  -2  -1   5   58.02    1.41 
   2   1   5   58.05    1.20 
   2   1   5   57.31    1.36 
   3  -1   5   42.83    1.16 
  -3   1   5   42.34    1.17 
   3   1  -5   43.39    1.11 
   3  -1   5   42.89    1.15 
  -3   1   5   41.91    1.20 
  -3  -1  -5   43.73    1.14 
  -3  -1  -5   43.23    1.20 
   3   1   5   43.65    1.05 
  -3   1  -5   41.17    1.20 
  -3  -1   5   41.73    1.21 
   3   1   5   42.05    1.21 
   3  -1  -5   44.44    1.23 
  -3   1  -5   44.76    1.08 
   3  -1  -5   45.62    0.90 
  -3  -1   5   42.87    1.00 
  -4  -1  -5   56.17    1.45 
   4   1  -5   57.25    1.56 
  -4   1   5   54.15    1.54 
   4   1  -5   57.04    1.44 
  -4  -1  -5   55.91    1.54 
   4  -1   5   54.27    1.48 
   4  -1   5   54.44    1.47 
  -4   1   5   57.25    1.50 
   4   1   5   58.86    1.42 
  -4   1  -5   57.29    1.43 
  -4  -1   5   55.91    1.59 
   4  -1  -5   54.53    1.56 
   4  -1  -5   57.39    1.22 
  -4  -1   5   56.90    1.32 
   4   1   5   57.02    1.56 
  -4   1  -5   54.04    1.54 
  -5  -1  -5   36.40    1.25 
  -5   1   5   36.97    1.26 
   5  -1   5   35.91    1.19 
  -5  -1  -5   35.02    1.13 
   5  -1   5   37.32    1.17 
  -5   1   5   33.84    1.15 
   5   1  -5   35.70    1.24 
   5   1  -5   36.03    1.12 
  -5   1  -5   34.64    1.22 
   5  -1  -5   33.34    1.24 
   5   1   5   36.08    1.22 
  -5  -1   5   36.35    1.28 
  -5  -1   5   35.19    0.99 
   5   1   5   35.16    1.09 
  -5   1  -5   34.56    1.11 
   6  -1   5   21.51    0.93 
   6  -1   5   22.61    0.98 
  -6   1   5   23.04    0.97 
   6   1  -5   22.73    0.91 
  -6   1   5   20.26    1.01 
  -6  -1  -5   23.18    1.04 
   6   1  -5   21.03    1.01 
  -6  -1  -5   23.02    0.93 
  -6   1  -5   22.80    1.03 
   6  -1  -5   21.72    1.04 
  -6  -1   5   22.18    1.06 
  -6   1  -5   22.63    0.94 
   6   1   5   22.34    0.98 
   6   1   5   22.18    0.93 
   7  -1   5   10.85    0.70 
  -7  -1  -5   10.41    0.77 
  -7   1   5    9.02    0.74 
   7  -1   5   10.38    0.75 
  -7   1   5   10.39    0.71 
   7   1  -5   10.89    0.81 
  -7   1  -5   10.62    0.71 
  -7  -1   5   10.51    0.80 
   7  -1  -5   13.46    0.89 
  -7   1  -5   10.18    0.77 
   7   1   5   11.88    0.79 
   7   1   5   10.48    0.72 
  -8   1   5   15.46    1.03 
   8  -1   5   17.46    1.03 
   8   1  -5   16.69    1.05 
  -8  -1  -5   16.28    1.02 
   8   1   5   17.85    1.01 
   8  -1  -5   17.55    1.11 
  -8  -1   5   18.23    1.11 
  -8   1  -5   16.96    1.01 
  -9   1   5    0.90    0.45 
   9   1  -5    1.01    0.43 
  -9  -1  -5    0.79    0.44 
   9  -1   5    0.76    0.42 
   9  -1  -5    0.97    0.46 
  -9  -1   5    1.97    0.54 
 -10   1   5    0.61    0.47 
 -10  -1  -5    0.80    0.48 
   0   2   5    3.90    0.27 
   0  -2  -5    3.99    0.24 
   0  -2   5    4.14    0.20 
   0   2   5    3.75    0.29 
   0  -2   5    3.67    0.28 
   0  -2   5    3.48    0.28 
   0   2  -5    3.80    0.27 
   1  -2   5   25.33    0.77 
   1  -2   5   25.68    0.77 
  -1   2   5   25.94    0.62 
  -1  -2  -5   24.97    0.80 
   1   2  -5   26.28    0.64 
  -1   2   5   25.76    0.81 
  -1  -2  -5   25.98    0.60 
   1   2  -5   25.77    0.78 
  -1  -2   5   25.27    0.77 
  -1   2  -5   26.01    0.79 
   1  -2  -5   27.32    0.80 
   1   2   5   25.31    0.75 
   1   2   5   24.96    0.78 
  -1  -2   5   25.17    0.71 
   1  -2  -5   25.88    0.74 
  -2   2   5   25.17    0.81 
   2   2  -5   23.92    0.79 
   2  -2   5   25.32    0.80 
  -2  -2  -5   26.76    0.64 
   2   2  -5   25.97    0.56 
   2  -2   5   24.54    0.78 
  -2   2   5   25.69    0.85 
   2  -2  -5   26.40    0.83 
   2   2   5   25.65    0.85 
   2   2   5   25.70    0.76 
  -2  -2   5   26.92    0.83 
  -2   2  -5   26.84    0.58 
  -2   2  -5   26.06    0.86 
  -3  -2  -5   54.18    1.53 
  -3  -2  -5   57.47    1.39 
  -3   2   5   56.24    1.48 
   3   2  -5   57.07    1.47 
  -3   2   5   57.15    1.52 
   3  -2   5   59.02    1.45 
   3  -2   5   57.41    1.47 
   3   2   5   58.03    1.55 
   3   2   5   56.79    1.30 
  -3   2  -5   58.62    1.27 
  -3  -2   5   58.56    1.52 
   3  -2  -5   57.59    1.54 
  -3   2  -5   55.28    1.54 
  -3  -2   5   55.42    1.51 
  -4  -2  -5   17.51    0.82 
   4  -2   5   19.27    0.73 
  -4   2   5   18.49    0.81 
  -4  -2  -5   17.89    0.68 
  -4   2   5   17.63    0.76 
   4   2  -5   17.72    0.76 
   4  -2   5   18.23    0.78 
   4   2  -5   18.53    0.79 
  -4   2  -5   17.91    0.62 
  -4   2  -5   16.80    0.79 
  -4  -2   5   17.84    0.45 
  -4  -2   5   17.37    0.80 
   4  -2  -5   16.54    0.79 
   4   2   5   17.45    0.81 
   4   2   5   17.90    0.64 
   5   2  -5    3.84    0.48 
  -5  -2  -5    3.80    0.51 
   5  -2   5    5.56    0.53 
  -5  -2  -5    4.25    0.38 
   5   2  -5    4.29    0.49 
  -5   2   5    3.54    0.46 
  -5   2   5    4.32    0.46 
   5  -2   5    5.13    0.43 
   5  -2  -5    4.23    0.53 
   5   2   5    3.93    0.39 
  -5   2  -5    4.05    0.38 
  -5   2  -5    4.41    0.55 
  -5  -2   5    3.98    0.50 
   5   2   5    4.18    0.50 
   6  -2   5   39.39    1.42 
   6   2  -5   41.37    1.38 
   6  -2   5   41.88    1.31 
   6   2  -5   40.74    1.45 
  -6   2   5   40.81    1.43 
  -6  -2  -5   41.08    1.49 
  -6   2   5   37.66    1.40 
   6   2   5   40.26    1.44 
   6  -2  -5   38.96    1.48 
   6   2   5   41.76    1.30 
  -6  -2   5   38.93    1.48 
  -6   2  -5   37.95    1.45 
   7   2  -5    6.64    0.67 
   7  -2   5    6.75    0.66 
  -7   2   5    6.56    0.63 
  -7   2   5    7.51    0.68 
  -7  -2  -5    5.70    0.68 
   7   2   5    6.52    0.66 
  -7   2  -5    6.39    0.70 
  -7  -2   5    5.24    0.64 
   7  -2  -5    6.39    0.71 
   8   2  -5   14.29    0.98 
  -8   2   5   14.01    0.95 
  -8  -2  -5   14.81    1.03 
   8  -2   5   13.88    0.97 
  -8   2   5   12.97    0.88 
   8  -2  -5   12.57    0.98 
  -8   2  -5   12.06    0.97 
   8   2   5   16.04    1.00 
  -8  -2   5   13.25    1.01 
   9   2  -5    0.34    0.36 
   9  -2   5   -0.14    0.35 
  -9  -2  -5    0.22    0.37 
  -9   2   5    0.67    0.41 
   9  -2  -5    0.14    0.41 
  -9   2  -5   -0.17    0.37 
  -9  -2   5    0.83    0.47 
   0  -3  -5   30.21    0.82 
   0   3  -5   30.19    0.86 
   0   3   5   30.98    0.87 
   0  -3  -5   30.13    0.93 
   0  -3   5   30.13    0.92 
   0  -3   5   29.22    0.74 
   0   3   5   29.23    0.91 
  -1  -3  -5   12.96    0.44 
   1  -3   5   13.21    0.56 
   1  -3   5   12.43    0.56 
  -1  -3  -5   12.81    0.59 
  -1   3   5   13.09    0.46 
   1   3  -5   13.79    0.46 
   1   3  -5   11.11    0.55 
  -1   3   5   13.67    0.61 
   1  -3  -5   13.57    0.56 
  -1  -3   5   12.53    0.50 
  -1   3  -5   13.19    0.58 
   1   3   5   13.74    0.59 
   1  -3  -5   12.34    0.52 
   1   3   5   12.65    0.53 
  -1  -3   5   12.69    0.57 
   2   3  -5    3.02    0.34 
  -2   3   5    3.26    0.37 
  -2   3   5    2.95    0.20 
  -2  -3  -5    3.18    0.35 
   2  -3   5    2.60    0.29 
   2   3  -5    3.33    0.17 
   2  -3   5    3.27    0.35 
  -2  -3  -5    3.09    0.22 
   2   3   5    3.98    0.39 
   2  -3  -5    3.24    0.34 
  -2  -3   5    2.51    0.31 
  -2  -3   5    3.35    0.33 
  -2   3  -5    3.83    0.39 
   2  -3  -5    2.81    0.30 
   2   3   5    3.17    0.28 
  -3  -3  -5    8.11    0.38 
  -3   3   5    7.23    0.48 
   3  -3   5    8.20    0.46 
   3  -3   5    7.34    0.50 
   3   3  -5    7.87    0.52 
  -3  -3  -5    6.98    0.54 
  -3   3   5    7.58    0.54 
  -3  -3   5    8.00    0.51 
   3   3   5    8.74    0.42 
   3  -3  -5    7.44    0.53 
  -3   3  -5    8.42    0.30 
  -3   3  -5    7.27    0.53 
  -3  -3   5    8.52    0.53 
   3   3   5    8.32    0.56 
   4  -3   5   15.65    0.66 
  -4  -3  -5   14.93    0.60 
  -4   3   5   15.20    0.80 
  -4   3   5   13.81    0.69 
  -4  -3  -5   15.47    0.81 
   4  -3   5   15.03    0.75 
   4   3  -5   14.78    0.77 
   4  -3  -5   14.18    0.78 
   4   3   5   14.81    0.59 
  -4  -3   5   17.35    0.78 
   4   3   5   13.67    0.77 
  -4   3  -5   13.55    0.79 
  -4  -3   5   13.44    0.74 
   5   3  -5    1.14    0.31 
   5   3  -5    1.06    0.33 
   5  -3   5    1.01    0.33 
   5  -3   5    0.83    0.24 
  -5   3   5    0.97    0.28 
  -5   3   5    0.87    0.31 
  -5  -3  -5    0.73    0.34 
   5   3   5    0.79    0.24 
   5  -3  -5    1.16    0.36 
  -5   3  -5    0.64    0.36 
   5   3   5    1.31    0.37 
  -5  -3   5    0.66    0.28 
   6  -3   5    8.12    0.70 
  -6  -3  -5    7.81    0.74 
  -6   3   5    7.95    0.70 
   6   3  -5    9.49    0.70 
   6   3  -5    8.13    0.66 
  -6   3   5    8.75    0.66 
  -6  -3   5    7.69    0.70 
  -6   3  -5    8.49    0.71 
   6   3   5    8.51    0.72 
   6  -3  -5    7.31    0.70 
  -7   3   5    1.27    0.35 
   7  -3   5    1.56    0.42 
  -7  -3  -5    1.31    0.44 
  -7   3   5    1.59    0.44 
   7   3  -5    1.52    0.40 
   7   3  -5    1.14    0.41 
  -7   3  -5    2.05    0.49 
  -7  -3   5    0.75    0.37 
   7   3   5    1.50    0.45 
   7  -3  -5    0.91    0.42 
   8  -3   5    4.03    0.64 
  -8   3   5    3.00    0.57 
   8   3  -5    3.58    0.60 
  -8  -3  -5    3.58    0.65 
  -8   3   5    4.36    0.62 
   8  -3  -5    2.33    0.59 
   8   3   5    4.01    0.65 
  -8  -3   5    3.46    0.64 
  -8   3  -5    3.81    0.64 
   9  -3   5    1.83    0.56 
   9   3  -5    3.24    0.64 
  -9  -3  -5    1.32    0.51 
  -9  -3   5    2.49    0.65 
   9  -3  -5    2.94    0.66 
   9   3   5    1.87    0.55 
  -9   3  -5    1.78    0.57 
   0  -4   5  105.89    2.54 
   0   4   5  111.35    2.54 
   0  -4  -5  112.05    2.43 
   0   4  -5  109.32    2.56 
   0  -4   5  111.33    2.29 
   0  -4  -5  110.07    2.54 
   0   4  -5  109.31    2.44 
   0   4   5  111.16    2.48 
  -1   4   5   28.02    1.00 
   1   4  -5   28.22    1.00 
   1   4  -5   29.18    0.83 
   1  -4   5   30.13    1.01 
   1  -4   5   30.48    0.70 
  -1   4   5   30.62    0.88 
  -1  -4  -5   28.74    1.01 
  -1  -4  -5   29.28    0.86 
  -1  -4   5   27.89    0.98 
   1   4   5   30.04    0.93 
  -1  -4   5   28.83    0.87 
   1   4   5   29.84    0.99 
   1  -4  -5   28.53    0.93 
   1  -4  -5   27.51    0.95 
  -1   4  -5   28.82    0.96 
  -1   4  -5   26.92    0.96 
  -2   4   5   42.42    1.06 
   2   4  -5   43.14    1.33 
   2  -4   5   41.38    1.23 
  -2  -4  -5   41.91    1.33 
  -2   4   5   41.49    1.35 
   2  -4   5   41.77    1.31 
  -2  -4  -5   42.92    1.11 
   2   4  -5   44.75    0.98 
   2  -4  -5   42.57    1.24 
  -2   4  -5   41.06    1.30 
  -2  -4   5   40.83    1.26 
  -2  -4   5   40.24    1.20 
   2  -4  -5   41.92    1.25 
   2   4   5   42.11    1.31 
   2   4   5   41.50    1.14 
   3   4  -5   -0.29    0.19 
   3  -4   5   -0.08    0.15 
  -3  -4  -5    0.22    0.25 
   3  -4   5    0.09    0.21 
  -3   4   5    0.06    0.22 
  -3  -4  -5    0.08    0.14 
   3   4   5    0.22    0.27 
  -3  -4   5   -0.01    0.18 
   3  -4  -5   -0.14    0.21 
  -3  -4   5    0.00    0.19 
  -3   4  -5   -0.13    0.25 
   3  -4  -5    0.01    0.17 
   3   4   5    0.05    0.13 
  -4  -4  -5  104.56    2.75 
   4  -4   5  102.73    2.66 
  -4   4   5  106.35    2.58 
   4   4  -5  105.30    2.68 
  -4  -4  -5  109.11    2.41 
  -4   4   5  107.45    2.75 
   4  -4   5  104.96    2.49 
  -4  -4   5  105.12    2.66 
   4  -4  -5  107.20    2.71 
  -4  -4   5  107.56    2.71 
   4   4   5  105.48    2.75 
  -4   4  -5  108.48    2.78 
   5  -4   5   12.81    0.81 
  -5   4   5   11.57    0.70 
   5  -4   5   12.75    0.67 
  -5  -4  -5   12.13    0.83 
  -5   4   5   11.65    0.81 
   5   4  -5   12.20    0.81 
  -5  -4   5   11.90    0.75 
   5  -4  -5   12.39    0.83 
  -5   4  -5   12.28    0.88 
  -5  -4   5   13.68    0.84 
   5   4   5   12.43    0.85 
  -6   4   5   32.41    1.25 
  -6  -4  -5   31.81    1.39 
   6  -4   5   33.29    1.37 
   6   4  -5   32.84    1.37 
   6   4  -5   31.38    1.28 
  -6   4   5   29.65    1.34 
   6  -4  -5   30.58    1.36 
  -6   4  -5   30.47    1.40 
  -6  -4   5   30.28    1.35 
   6   4   5   32.54    1.39 
   7   4  -5    0.16    0.28 
  -7   4   5    0.37    0.35 
   7   4  -5    0.12    0.31 
   7  -4   5    0.04    0.32 
  -7  -4  -5    0.32    0.34 
  -7  -4   5    0.16    0.33 
   7   4   5    0.40    0.35 
   7  -4  -5    0.06    0.33 
  -7   4  -5    0.59    0.36 
   8   4  -5   12.15    0.95 
  -8  -4  -5   11.33    1.05 
  -8   4   5   10.80    0.94 
   8  -4   5   10.12    0.92 
  -8   4  -5   11.07    0.95 
   8  -4  -5   12.88    1.05 
  -8  -4   5   12.09    1.02 
   8   4   5   11.57    0.95 
  -9   4   5    5.33    0.79 
  -9  -4  -5    4.79    0.98 
   9   4  -5    7.58    0.84 
   9  -4   5    4.72    0.79 
  -9   4  -5    5.60    0.84 
   9   4   5    7.81    0.94 
   0   5   5    2.54    0.36 
   0  -5   5    3.21    0.30 
   0   5  -5    3.56    0.39 
   0  -5  -5    2.98    0.35 
   0   5  -5    3.76    0.41 
   0   5   5    3.04    0.38 
   0  -5  -5    2.86    0.39 
   0  -5   5    3.45    0.42 
  -1  -5  -5    7.13    0.56 
   1  -5   5    5.70    0.51 
  -1   5   5    8.06    0.59 
  -1   5   5    7.36    0.48 
   1   5  -5    7.41    0.45 
   1   5  -5    7.03    0.55 
  -1  -5  -5    7.80    0.46 
   1  -5  -5    7.05    0.51 
  -1  -5   5    7.02    0.54 
  -1   5  -5    7.45    0.53 
   1   5   5    7.49    0.50 
   1   5   5    7.08    0.56 
  -1  -5   5    7.12    0.46 
  -1   5  -5    6.74    0.56 
   1  -5  -5    6.64    0.51 
  -2   5   5  113.34    2.85 
   2  -5   5  111.91    2.81 
   2   5  -5  111.21    2.81 
  -2   5   5  118.14    2.52 
  -2  -5  -5  113.56    2.56 
  -2  -5  -5  116.45    2.84 
  -2   5  -5  114.88    2.81 
  -2  -5   5  114.37    2.66 
  -2  -5   5  110.59    2.74 
   2  -5  -5  114.55    2.73 
   2  -5  -5  112.41    2.67 
  -2   5  -5  114.30    2.71 
   2   5   5  111.73    2.81 
   2   5   5  114.33    2.58 
   3  -5   5   31.51    1.22 
  -3  -5  -5   31.78    1.00 
   3  -5   5   31.93    1.10 
  -3   5   5   32.09    1.26 
   3   5  -5   31.42    1.24 
  -3  -5  -5   30.93    1.25 
   3  -5  -5   32.15    1.20 
  -3   5  -5   30.91    1.25 
  -3  -5   5   29.78    1.13 
  -3  -5   5   32.19    1.18 
   3   5   5   29.77    1.21 
   3  -5  -5   32.62    1.12 
  -3   5  -5   31.44    1.10 
   4  -5   5   31.46    1.11 
   4  -5   5   30.28    1.25 
   4   5  -5   29.99    1.26 
  -4  -5  -5   31.81    1.33 
  -4   5   5   30.87    1.29 
  -4   5  -5   32.64    1.37 
   4  -5  -5   32.60    1.28 
  -4  -5   5   32.34    1.27 
   4  -5  -5   31.12    1.15 
  -4  -5   5   32.54    1.25 
   4   5   5   31.22    1.32 
  -5   5   5    7.91    0.74 
   5   5  -5    8.14    0.74 
  -5  -5  -5   10.32    0.81 
   5  -5   5    9.22    0.76 
   5   5   5    9.43    0.81 
  -5   5  -5    8.39    0.79 
  -5  -5   5   10.22    0.72 
   5  -5  -5    9.14    0.76 
   5  -5  -5   10.38    0.68 
  -5  -5   5    9.81    0.76 
  -6   5   5   13.47    0.97 
   6  -5   5   12.77    0.93 
   6   5  -5   15.65    1.01 
  -6  -5  -5   15.28    1.02 
   6   5  -5   15.63    0.93 
   6   5   5   16.97    1.08 
   6  -5  -5   14.74    1.00 
  -6   5  -5   15.52    1.06 
  -6  -5   5   14.80    0.99 
   7  -5   5    1.11    0.43 
   7   5  -5    0.07    0.36 
   7   5  -5    1.14    0.38 
  -7   5   5    0.85    0.39 
  -7  -5  -5    0.62    0.43 
   7  -5  -5    0.48    0.41 
  -7   5  -5    0.07    0.37 
   7   5   5    0.78    0.41 
  -7  -5   5    0.50    0.36 
  -8   5   5    1.97    0.54 
   8   5  -5    2.46    0.63 
  -8  -5  -5    1.62    0.56 
   8   5  -5    3.03    0.61 
   8  -5   5    2.10    0.57 
   8  -5  -5    2.76    0.64 
   8   5   5    2.60    0.60 
  -8   5  -5    1.92    0.61 
  -8  -5   5    1.11    0.49 
   0   6   5   12.33    0.72 
   0  -6  -5   12.94    0.77 
   0   6   5   11.81    0.72 
   0  -6   5   12.40    0.75 
   0   6  -5   11.93    0.74 
   0  -6  -5   13.60    0.70 
   0   6  -5   13.69    0.73 
  -1   6   5    6.60    0.54 
   1  -6   5    6.83    0.60 
  -1  -6  -5    6.99    0.61 
  -1  -6  -5    6.31    0.50 
  -1   6   5    6.60    0.59 
   1   6   5    7.79    0.65 
  -1   6  -5    6.05    0.58 
  -1   6  -5    6.37    0.55 
  -1  -6   5    5.24    0.44 
   1  -6  -5    6.63    0.54 
   1   6   5    6.72    0.51 
   1  -6  -5    7.18    0.58 
  -1  -6   5    5.37    0.56 
   2  -6   5   16.98    0.90 
  -2  -6  -5   15.12    0.88 
  -2   6   5   16.56    0.91 
   2   6  -5   16.29    0.91 
  -2  -6  -5   15.59    0.73 
   2   6   5   16.34    0.92 
  -2   6  -5   17.10    0.93 
  -2   6  -5   17.50    0.85 
  -2  -6   5   16.88    0.88 
   2  -6  -5   17.12    0.83 
  -2  -6   5   16.51    0.81 
   2  -6  -5   17.38    0.87 
  -3  -6  -5   24.16    1.18 
   3   6  -5   22.89    1.12 
  -3   6   5   29.65    1.25 
   3  -6   5   25.82    1.17 
  -3  -6   5   26.38    1.11 
   3  -6  -5   27.23    1.07 
  -3   6  -5   27.53    1.24 
   3  -6  -5   27.33    1.16 
   3   6   5   27.40    1.23 
  -3  -6   5   26.65    1.14 
  -3   6  -5   28.28    1.10 
   4   6  -5   16.70    1.01 
  -4  -6  -5   15.46    0.98 
   4  -6   5   15.70    0.96 
  -4   6   5   15.54    0.97 
   4   6   5   17.06    1.03 
   4  -6  -5   17.31    0.97 
  -4   6  -5   17.74    1.05 
  -4  -6   5   15.31    0.90 
  -4   6  -5   18.15    0.86 
   4  -6  -5   16.48    0.85 
  -4  -6   5   18.27    0.95 
   5   6  -5    0.38    0.34 
  -5   6   5    0.71    0.37 
  -5  -6  -5    0.49    0.34 
   5  -6   5    0.07    0.28 
   5   6   5    0.94    0.42 
  -5  -6   5    0.48    0.30 
  -5  -6   5    0.84    0.33 
  -5   6  -5    0.61    0.40 
   5  -6  -5    0.36    0.35 
   6   6  -5   15.62    1.09 
   6  -6   5   15.91    1.08 
  -6   6   5   14.71    1.07 
  -6  -6  -5   16.52    1.11 
  -6  -6   5   15.79    0.98 
   6  -6  -5   15.91    1.05 
   6   6   5   16.53    1.12 
  -6   6  -5   15.81    1.09 
  -6  -6   5   14.97    1.03 
   7   6  -5    8.54    0.96 
  -7   6   5    8.61    0.91 
  -7  -6  -5    8.59    0.93 
   7   6  -5    9.71    0.81 
   7  -6   5    8.17    0.88 
   7   6   5    7.00    0.89 
  -7   6  -5    7.83    0.91 
   7  -6  -5    8.79    0.90 
  -7  -6   5    9.50    0.91 
   8   6  -5   13.48    1.03 
   8   6  -5   14.09    1.17 
   0   7   5    1.32    0.34 
   0   7   5    0.98    0.33 
   0   7  -5    0.48    0.31 
   0  -7  -5    0.97    0.35 
   0  -7   5    0.43    0.31 
   0  -7  -5    0.32    0.24 
  -1  -7  -5   13.81    0.85 
  -1  -7  -5   13.69    0.75 
  -1   7   5   12.52    0.83 
   1  -7   5   15.12    0.89 
  -1   7   5   13.38    0.77 
   1   7  -5   12.88    0.85 
   1  -7  -5   13.89    0.82 
  -1   7  -5   13.44    0.82 
   1  -7  -5   14.82    0.83 
   1   7   5   14.05    0.86 
  -1   7  -5   13.05    0.80 
   1   7   5   13.94    0.76 
  -1  -7   5   12.86    0.83 
   2  -7   5    8.88    0.73 
   2   7  -5    9.16    0.77 
  -2  -7  -5    9.00    0.75 
  -2   7   5    9.33    0.76 
  -2  -7   5    8.78    0.72 
   2  -7  -5    8.52    0.68 
   2   7   5    7.93    0.73 
   2  -7  -5    9.31    0.68 
  -2   7  -5    7.24    0.70 
  -2   7  -5    9.22    0.67 
  -3   7   5    2.23    0.49 
   3   7  -5    3.70    0.60 
   3  -7   5    3.32    0.52 
  -3  -7  -5    3.09    0.54 
   3  -7  -5    2.84    0.49 
  -3   7  -5    2.65    0.45 
  -3  -7   5    2.90    0.48 
  -3   7  -5    2.91    0.55 
   3   7   5    3.57    0.60 
  -3  -7   5    3.00    0.48 
   4   7  -5   16.25    1.06 
  -4   7   5   14.50    1.01 
  -4  -7  -5   15.32    1.02 
   4  -7   5   16.80    1.03 
  -4   7  -5   14.99    1.01 
   4   7   5   16.65    1.08 
  -4  -7   5   16.47    0.97 
  -4  -7   5   15.82    0.95 
   4  -7  -5   16.92    1.04 
  -5  -7  -5    7.28    0.79 
  -5   7   5    7.59    0.85 
   5   7  -5    6.51    0.80 
   5  -7   5    6.16    0.74 
  -5  -7   5    6.53    0.69 
   5   7   5    6.66    0.88 
   5  -7  -5    8.88    0.83 
  -5  -7   5    7.60    0.75 
  -5   7  -5    6.17    0.81 
   6  -7   5    3.25    0.63 
  -6  -7  -5    2.06    0.56 
  -6   7   5    1.74    0.52 
   6   7  -5    1.96    0.55 
  -6  -7   5    1.09    0.47 
   6  -7  -5    2.61    0.61 
  -6   7  -5    2.45    0.65 
  -6  -7   5    1.91    0.50 
   6   7   5    1.77    0.55 
   7  -7   5    0.77    0.51 
  -7  -7  -5    0.93    0.61 
   7   7  -5    1.68    0.48 
   7   7  -5    0.88    0.55 
  -7  -7   5    1.82    0.57 
   7  -7  -5    1.70    0.64 
   0   8   5    4.68    0.61 
   0  -8  -5    3.79    0.53 
   0  -8   5    5.53    0.64 
   0   8  -5    3.92    0.57 
   0   8   5    4.40    0.58 
   0  -8  -5    3.53    0.55 
  -1   8   5    2.40    0.48 
  -1  -8  -5    1.46    0.43 
   1  -8   5    2.39    0.49 
   1   8  -5    2.40    0.50 
  -1   8  -5    2.26    0.49 
   1  -8  -5    3.20    0.52 
   1   8   5    1.91    0.48 
  -1  -8   5    1.97    0.48 
   2   8  -5   11.01    0.90 
  -2   8   5   10.57    0.86 
   2  -8   5   11.06    0.87 
  -2  -8  -5    9.66    0.83 
  -2  -8   5   10.58    0.85 
  -2   8  -5   10.51    0.86 
  -2   8  -5   10.10    0.76 
   2  -8  -5    8.84    0.76 
   2   8   5    9.40    0.85 
  -3  -8  -5    2.49    0.51 
   3   8  -5    4.05    0.65 
  -3   8   5    3.28    0.60 
   3  -8   5    2.08    0.50 
   3  -8  -5    2.35    0.49 
   3   8   5    3.21    0.63 
  -3  -8   5    3.01    0.55 
  -3   8  -5    4.04    0.64 
   4  -8   5   19.51    1.20 
  -4  -8  -5   22.33    1.27 
   4   8  -5   23.22    1.35 
  -4   8   5   22.94    1.31 
   4   8   5   23.98    1.36 
   4  -8  -5   23.01    1.26 
  -4  -8   5   21.86    1.18 
  -4   8  -5   20.81    1.28 
  -5   8   5    5.46    0.80 
   5   8  -5    6.65    0.90 
   5  -8   5    6.89    0.84 
  -5  -8  -5    6.91    0.90 
  -5  -8   5    5.59    0.75 
   5   8   5    7.37    0.90 
  -5  -8   5    6.75    0.77 
   5  -8  -5    8.79    0.86 
  -5   8  -5    7.10    0.93 
  -6  -8  -5   13.01    1.16 
  -6  -8   5   15.91    1.12 
  -6  -8   5   11.86    1.06 
   6  -8  -5   12.30    1.22 
   0  -9   5    0.92    0.45 
   0   9  -5    0.78    0.39 
   1  -9   5    7.58    0.82 
   1   9  -5    7.62    0.85 
  -1   9   5    9.26    0.84 
  -1  -9   5    8.22    0.87 
   1   9   5    9.47    0.90 
   1  -9  -5    8.59    0.79 
  -1   9  -5    9.38    0.82 
   2   9  -5   36.67    1.67 
  -2   9   5   36.95    1.67 
  -2  -9  -5   35.25    1.60 
   2  -9   5   33.86    1.61 
  -2   9  -5   33.06    1.48 
   2  -9  -5   36.14    1.56 
   2   9   5   33.57    1.61 
  -2  -9   5   35.52    1.58 
   3  -9   5    0.06    0.33 
  -3   9   5    0.74    0.45 
   3   9  -5    0.20    0.41 
  -3  -9  -5    0.19    0.36 
  -3  -9   5    0.54    0.38 
   3  -9  -5    0.47    0.39 
  -3   9  -5    0.29    0.41 
   3   9   5    1.06    0.49 
  -4  -9  -5   -0.07    0.37 
   4  -9   5    0.83    0.46 
  -4   9   5    1.24    0.54 
   4   9  -5    0.13    0.45 
  -4   9  -5   -0.12    0.40 
   4   9   5    0.43    0.47 
  -4  -9   5    0.19    0.38 
   4  -9  -5    0.20    0.40 
  -5  -9  -5    3.95    1.23 
  -5  -9   5    4.13    0.72 
   0 -10   5    4.91    0.78 
   0  10  -5    6.81    0.90 
   1 -10   5    3.65    0.71 
   1  10  -5    3.36    0.69 
  -1  10  -5    4.38    0.74 
  -1 -10   5    4.68    0.77 
  -2 -10   5    3.16    0.68 
   2  10   5    3.79    0.73 
  -3 -10   5    7.05    1.06 
   3 -10  -5    6.54    0.87 
   0   0   6  127.90    2.63 
   0   0   6  129.71    2.52 
   0   0   6  126.61    2.58 
   0   0  -6  130.55    2.59 
   1   0  -6   19.85    0.58 
   1   0   6   20.19    0.48 
   1   0   6   20.26    0.62 
   1   0   6   19.40    0.62 
  -1   0  -6   18.61    0.56 
  -1   0   6   19.16    0.58 
  -1   0   6   20.25    0.58 
  -1   0   6   19.75    0.53 
   2   0  -6  351.81    6.55 
   2   0   6  353.51    6.56 
   2   0   6  334.27    6.72 
   2   0  -6  346.09    6.72 
  -2   0  -6  350.70    6.75 
  -2   0  -6  343.18    6.65 
  -2   0   6  340.56    6.76 
  -2   0   6  354.60    6.66 
   3   0  -6   29.35    0.74 
   3   0   6   28.13    0.79 
   3   0  -6   27.17    0.90 
  -3   0  -6   26.35    0.83 
  -3   0  -6   28.29    0.90 
   3   0   6   28.59    0.91 
  -3   0   6   28.78    0.83 
   4   0   6    1.92    0.31 
   4   0   6    2.51    0.31 
  -4   0  -6    1.84    0.29 
  -4   0   6    2.26    0.28 
  -4   0  -6    1.75    0.27 
   4   0  -6    1.47    0.29 
  -4   0   6    1.25    0.26 
   4   0  -6    1.76    0.23 
  -5   0   6   31.51    1.19 
  -5   0   6   32.79    1.03 
   5   0   6   32.04    1.06 
   5   0  -6   34.04    0.96 
   5   0  -6   32.57    1.19 
  -5   0  -6   30.57    1.09 
  -5   0  -6   31.50    1.12 
   5   0   6   31.81    1.12 
  -6   0   6    2.26    0.44 
  -6   0   6    1.78    0.32 
   6   0   6    1.40    0.35 
   6   0   6    2.44    0.41 
  -6   0  -6    2.51    0.41 
  -6   0  -6    1.88    0.37 
   6   0  -6    1.91    0.42 
  -7   0  -6    7.51    0.66 
   7   0   6    6.95    0.61 
  -7   0   6    7.48    0.70 
  -7   0  -6    6.66    0.64 
   7   0  -6    6.76    0.69 
   7   0   6    6.94    0.63 
   8   0   6    2.57    0.47 
  -8   0  -6    3.26    0.53 
  -8   0   6    3.14    0.56 
   8   0  -6    3.75    0.62 
   8   0   6    3.35    0.54 
  -9   0   6   -0.14    0.36 
   9   0  -6   -0.17    0.37 
   0   1   6    4.02    0.28 
   0   1   6    4.00    0.24 
   0  -1   6    4.49    0.28 
   0  -1   6    4.33    0.22 
   0   1  -6    4.26    0.26 
   0  -1   6    4.21    0.25 
   0  -1  -6    4.47    0.19 
   1   1  -6    5.90    0.31 
   1  -1   6    5.85    0.29 
  -1   1   6    5.75    0.22 
  -1  -1  -6    5.07    0.34 
   1  -1   6    5.85    0.34 
  -1   1   6    5.72    0.34 
  -1   1   6    6.20    0.35 
  -1   1  -6    5.70    0.23 
  -1  -1   6    5.66    0.32 
  -1  -1   6    5.41    0.30 
   1  -1  -6    5.84    0.31 
   1   1   6    6.03    0.34 
  -1   1  -6    6.15    0.35 
  -1  -1   6    5.52    0.26 
   1   1   6    5.72    0.33 
  -1  -1   6    5.85    0.32 
   2  -1   6   39.12    1.06 
   2   1  -6   39.93    1.00 
  -2   1   6   37.82    1.05 
  -2  -1  -6   39.54    1.07 
  -2   1   6   39.68    1.09 
   2  -1   6   38.42    0.98 
   2   1   6   40.88    0.86 
  -2   1  -6   40.29    0.92 
   2   1   6   39.45    1.10 
   2   1   6   39.17    1.05 
   2  -1  -6   39.85    0.80 
  -2   1  -6   38.09    1.08 
  -2  -1   6   41.19    0.93 
   2  -1  -6   40.47    1.07 
   3   1  -6   88.96    2.11 
   3  -1   6   88.09    2.00 
   3  -1   6   91.09    2.08 
   3   1  -6   90.29    1.99 
  -3   1   6   89.52    2.07 
  -3  -1  -6   88.99    2.04 
  -3  -1  -6   89.20    2.10 
  -3   1   6   89.54    2.13 
   3  -1  -6   93.48    1.75 
  -3  -1   6   91.68    1.90 
   3  -1  -6   90.91    2.14 
   3   1   6   91.81    1.91 
   3   1   6   87.39    2.13 
  -3   1  -6   86.31    2.13 
  -3  -1   6   89.31    2.14 
  -3   1  -6   91.85    1.96 
   4  -1   6    1.47    0.27 
   4  -1   6    1.44    0.27 
   4   1  -6    1.64    0.26 
  -4  -1  -6    2.56    0.30 
   4   1  -6    1.32    0.28 
  -4  -1  -6    1.52    0.30 
  -4   1   6    1.48    0.26 
  -4   1   6    1.41    0.29 
   4   1   6    1.14    0.26 
  -4   1  -6    1.76    0.25 
   4  -1  -6    1.87    0.17 
  -4  -1   6    1.84    0.32 
   4  -1  -6    1.73    0.32 
  -4   1  -6    1.57    0.29 
   4   1   6    2.25    0.27 
  -4  -1   6    2.09    0.23 
   5   1  -6   37.06    1.12 
   5   1  -6   34.23    1.25 
   5  -1   6   34.27    1.16 
  -5  -1  -6   34.60    1.23 
  -5   1   6   36.52    1.26 
   5  -1   6   37.03    1.19 
  -5  -1  -6   35.37    1.15 
  -5   1   6   34.33    1.16 
  -5  -1   6   39.26    1.04 
   5  -1  -6   35.34    1.29 
  -5   1  -6   37.27    1.28 
   5   1   6   36.60    1.12 
   5   1   6   36.24    1.26 
  -5   1  -6   40.33    1.18 
  -5  -1   6   33.25    1.26 
  -6  -1  -6   45.26    1.57 
  -6   1   6   47.37    1.49 
   6  -1   6   48.67    1.51 
   6   1  -6   51.74    1.66 
  -6  -1  -6   47.67    1.48 
   6  -1   6   47.63    1.54 
  -6   1   6   46.54    1.60 
  -6   1  -6   48.78    1.48 
   6   1   6   50.69    1.61 
  -6   1  -6   49.20    1.60 
   6   1   6   49.45    1.47 
   6  -1  -6   45.90    1.62 
  -6  -1   6   46.05    1.64 
   7   1  -6    4.31    0.60 
   7  -1   6    3.51    0.48 
   7  -1   6    3.68    0.52 
  -7   1   6    4.32    0.51 
  -7  -1  -6    3.85    0.56 
  -7   1   6    3.57    0.55 
  -7  -1   6    4.17    0.59 
  -7   1  -6    4.35    0.59 
   7  -1  -6    4.10    0.61 
   7   1   6    3.33    0.48 
   7   1   6    3.73    0.53 
  -7   1  -6    4.33    0.52 
  -8  -1  -6   17.41    1.07 
   8   1  -6   19.26    1.13 
   8  -1   6   18.37    1.05 
  -8   1   6   19.41    1.12 
   8   1   6   19.77    1.07 
  -8   1  -6   18.81    1.08 
  -8  -1   6   18.61    1.14 
   8  -1  -6   17.72    1.13 
  -9  -1  -6    2.37    0.57 
  -9   1   6    2.79    0.60 
   9   1  -6    1.65    0.51 
  -9  -1   6    3.43    0.67 
   9  -1  -6    3.68    0.69 
 -10   1   6    0.86    0.54 
   0  -2   6  197.92    4.04 
   0   2   6  200.40    4.06 
   0  -2  -6  200.68    3.86 
   0   2   6  201.44    3.96 
   0  -2  -6  197.72    4.06 
   0  -2   6  207.41    3.85 
   0  -2   6  198.29    4.03 
   0   2  -6  201.58    3.98 
   1  -2   6   87.42    1.99 
  -1  -2  -6   89.90    1.73 
   1  -2   6   85.15    1.95 
  -1   2   6   90.24    1.79 
   1   2  -6   89.31    1.83 
   1   2  -6   88.38    1.98 
  -1   2   6   85.15    2.01 
  -1  -2  -6   90.18    2.03 
   1   2   6   87.87    1.99 
   1   2   6   89.08    1.99 
   1  -2  -6   86.90    2.01 
  -1  -2   6   93.47    1.94 
  -1  -2   6   89.28    2.01 
   1  -2  -6   90.02    1.93 
  -1   2  -6   87.93    2.00 
   2  -2   6   33.96    0.96 
  -2   2   6   34.01    1.03 
   2   2  -6   34.31    0.76 
   2  -2   6   34.01    0.98 
  -2   2   6   33.46    1.00 
   2   2  -6   32.86    0.96 
  -2  -2  -6   32.06    1.01 
  -2  -2   6   35.35    1.01 
   2   2   6   36.15    0.78 
   2   2   6   34.64    1.04 
   2   2   6   34.94    0.97 
   2  -2  -6   35.58    1.02 
  -2   2  -6   35.74    0.73 
  -2   2  -6   34.22    1.04 
  -2  -2   6   32.66    1.01 
   3  -2   6   79.39    1.90 
   3   2  -6   79.89    1.89 
  -3   2   6   77.20    1.96 
  -3  -2  -6   81.86    2.00 
  -3  -2  -6   79.94    1.85 
   3  -2   6   79.63    1.91 
  -3   2   6   76.38    1.93 
   3   2   6   83.17    1.72 
  -3   2  -6   78.28    2.01 
  -3  -2   6   80.41    1.99 
  -3  -2   6   81.99    1.60 
  -3  -2   6   79.52    1.97 
   3  -2  -6   79.63    1.98 
  -3   2  -6   80.66    1.69 
   4   2  -6   18.10    0.77 
  -4  -2  -6   18.36    0.84 
   4   2  -6   17.69    0.79 
  -4  -2  -6   18.25    0.70 
  -4   2   6   18.09    0.80 
   4  -2   6   18.37    0.74 
   4  -2   6   18.88    0.78 
  -4   2   6   18.48    0.81 
   4  -2  -6   19.55    0.86 
   4   2   6   19.90    0.66 
  -4  -2   6   18.65    0.84 
   4   2   6   18.43    0.84 
  -4  -2   6   17.14    0.53 
  -4   2  -6   19.15    0.87 
  -4   2  -6   18.94    0.63 
   5  -2   6   17.08    0.83 
   5  -2   6   17.80    0.77 
  -5  -2  -6   16.73    0.72 
  -5   2   6   16.91    0.83 
   5   2  -6   17.63    0.82 
  -5   2   6   18.26    0.85 
   5   2  -6   15.77    0.82 
  -5  -2  -6   16.38    0.87 
  -5  -2   6   16.44    0.87 
   5   2   6   18.24    0.71 
   5   2   6   15.81    0.85 
  -5   2  -6   15.93    0.86 
  -5   2  -6   16.52    0.68 
   5  -2  -6   16.48    0.88 
  -6   2   6    9.74    0.70 
   6   2  -6    8.96    0.69 
   6  -2   6   10.16    0.70 
  -6  -2  -6    8.34    0.71 
  -6   2   6   10.45    0.71 
   6  -2   6    9.26    0.62 
   6   2  -6    9.23    0.66 
  -6   2  -6    9.41    0.75 
   6  -2  -6    7.80    0.70 
  -6  -2   6   10.07    0.75 
   6   2   6   10.01    0.75 
   6   2   6    9.47    0.61 
  -7   2   6    3.13    0.52 
  -7  -2  -6    3.10    0.55 
   7   2  -6    3.00    0.52 
  -7   2   6    3.09    0.50 
   7  -2   6    2.35    0.47 
   7   2   6    4.12    0.57 
  -7   2  -6    2.55    0.49 
   7  -2  -6    3.65    0.58 
  -7  -2   6    2.55    0.51 
  -8  -2  -6    0.34    0.36 
   8   2  -6    0.28    0.33 
   8  -2   6    0.90    0.38 
  -8   2   6    1.10    0.40 
   8   2   6    0.32    0.31 
  -8   2  -6   -0.19    0.35 
   8  -2  -6    1.58    0.45 
  -8  -2   6    0.68    0.41 
  -9  -2  -6    1.86    0.53 
   9  -2   6    2.14    0.55 
   9   2  -6    2.24    0.56 
  -9   2   6    1.20    0.45 
   9   2   6    2.43    0.53 
  -9  -2   6    1.62    0.54 
  -9   2  -6    1.62    0.53 
   9  -2  -6    1.97    0.61 
   0   3   6   21.96    0.71 
   0   3   6   20.91    0.76 
   0  -3  -6   21.79    0.65 
   0  -3   6   23.20    0.59 
   0  -3   6   21.08    0.75 
   0   3  -6   22.25    0.71 
   0  -3  -6   21.91    0.78 
   1   3  -6   47.12    1.10 
  -1   3   6   46.59    1.10 
  -1  -3  -6   44.89    1.29 
   1  -3   6   44.47    1.25 
   1   3  -6   44.71    1.27 
   1  -3   6   45.37    1.26 
  -1  -3  -6   48.03    1.07 
  -1   3   6   46.07    1.30 
  -1  -3   6   46.57    1.16 
   1   3   6   46.85    1.23 
   1  -3  -6   45.01    1.26 
  -1  -3   6   44.16    1.25 
   1   3   6   48.30    1.27 
   1  -3  -6   46.40    1.19 
  -1   3  -6   45.50    1.26 
  -2   3   6   52.53    1.12 
  -2  -3  -6   50.69    1.47 
   2  -3   6   51.28    1.38 
   2   3  -6   52.61    1.43 
  -2   3   6   51.60    1.47 
   2  -3   6   52.60    1.42 
  -2  -3  -6   52.24    1.18 
   2   3  -6   54.21    1.11 
   2  -3  -6   51.24    1.39 
   2   3   6   51.05    1.44 
  -2  -3   6   50.85    1.41 
  -2   3  -6   52.27    1.44 
  -2  -3   6   52.18    1.38 
   2  -3  -6   52.36    1.41 
   2   3   6   53.39    1.33 
  -3  -3  -6   46.49    1.43 
  -3  -3  -6   48.11    1.13 
  -3   3   6   45.79    1.34 
  -3   3   6   45.30    1.42 
   3  -3   6   45.65    1.31 
   3  -3   6   46.87    1.37 
   3   3  -6   47.39    1.37 
   3   3   6   47.92    1.45 
   3   3   6   48.12    1.26 
  -3  -3   6   47.83    1.39 
  -3   3  -6   46.82    1.43 
   3  -3  -6   47.75    1.41 
  -3   3  -6   46.37    1.09 
  -3  -3   6   47.18    1.40 
   4   3  -6   19.69    0.87 
  -4  -3  -6   20.77    0.74 
  -4  -3  -6   19.85    0.93 
   4  -3   6   20.11    0.87 
   4  -3   6   20.41    0.81 
  -4   3   6   18.96    0.85 
  -4   3   6   20.84    0.92 
   4   3   6   20.18    0.93 
  -4  -3   6   18.50    0.86 
   4   3   6   19.87    0.68 
   4  -3  -6   20.65    0.92 
  -4  -3   6   18.03    0.84 
  -4   3  -6   18.28    0.89 
  -5   3   6   17.38    0.85 
   5  -3   6   17.61    0.78 
  -5  -3  -6   15.73    0.83 
   5  -3   6   17.48    0.87 
  -5   3   6   17.64    0.91 
  -5  -3  -6   16.76    0.92 
   5   3  -6   18.19    0.88 
   5   3  -6   17.24    0.86 
   5  -3  -6   14.88    0.88 
   5   3   6   16.78    0.92 
  -5  -3   6   16.10    0.89 
   5   3   6   18.58    0.72 
  -5   3  -6   17.53    0.95 
   6   3  -6   58.79    1.81 
   6  -3   6   58.11    1.69 
  -6   3   6   58.04    1.86 
  -6   3   6   55.44    1.79 
  -6  -3  -6   56.57    1.90 
   6  -3   6   56.96    1.81 
   6   3  -6   56.95    1.84 
   6   3   6   60.06    1.92 
  -6  -3   6   59.33    1.95 
  -6   3  -6   58.69    1.96 
   6  -3  -6   56.04    1.91 
   7  -3   6    2.45    0.50 
   7   3  -6    2.84    0.53 
  -7   3   6    2.63    0.48 
  -7   3   6    3.01    0.52 
  -7  -3  -6    2.64    0.53 
   7   3  -6    3.82    0.58 
  -7   3  -6    3.01    0.57 
  -7  -3   6    3.42    0.59 
   7  -3  -6    2.69    0.53 
   7   3   6    3.45    0.59 
  -8   3   6    9.35    0.83 
  -8   3   6    7.64    0.78 
  -8  -3  -6    8.73    0.88 
   8  -3   6    9.50    0.84 
   8   3  -6    8.79    0.82 
  -8   3  -6    9.04    0.88 
  -8  -3   6    8.77    0.88 
   8   3   6    8.37    0.83 
   8  -3  -6   11.70    0.99 
  -9  -3  -6    1.87    0.60 
   9  -3   6    1.37    0.48 
   9   3  -6    2.39    0.58 
   9  -3  -6    1.85    0.60 
  -9   3  -6    2.27    0.60 
   9   3   6    2.87    0.63 
  -9  -3   6    3.21    0.70 
   0  -4   6   14.71    0.68 
   0   4   6   14.56    0.67 
   0   4  -6   16.01    0.70 
   0   4   6   14.46    0.63 
   0  -4  -6   14.41    0.58 
   0   4  -6   14.72    0.62 
   0  -4  -6   13.87    0.67 
   0  -4   6   15.45    0.50 
   1  -4   6    9.06    0.28 
  -1   4   6    8.97    0.44 
  -1  -4  -6    8.72    0.42 
   1   4  -6    8.19    0.41 
   1   4  -6    9.49    0.56 
  -1   4   6    9.00    0.56 
   1  -4   6    8.54    0.53 
  -1  -4  -6    8.96    0.57 
   1  -4  -6    8.24    0.47 
  -1   4  -6    8.66    0.51 
   1  -4  -6    7.88    0.50 
  -1  -4   6    7.80    0.43 
  -1  -4   6    8.86    0.53 
   1   4   6    8.30    0.52 
  -1   4  -6    7.92    0.51 
   1   4   6    8.19    0.48 
  -2   4   6   53.50    1.22 
   2  -4   6   51.54    1.50 
   2   4  -6   52.27    1.36 
  -2  -4  -6   49.89    1.52 
   2   4  -6   49.41    1.49 
  -2   4   6   47.65    1.50 
  -2  -4  -6   50.85    1.24 
   2  -4   6   50.05    1.43 
  -2  -4   6   51.48    1.49 
   2   4   6   49.31    1.51 
  -2   4  -6   53.32    1.54 
   2  -4  -6   53.27    1.46 
  -2  -4   6   49.53    1.40 
   2  -4  -6   51.66    1.46 
   2   4   6   52.46    1.38 
   3  -4   6   11.04    0.64 
   3  -4   6   10.46    0.59 
   3   4  -6   10.64    0.65 
  -3  -4  -6   10.56    0.48 
  -3   4   6    9.58    0.68 
  -3  -4  -6   10.69    0.70 
  -3  -4   6   11.18    0.63 
  -3   4  -6    9.78    0.69 
   3   4   6   11.05    0.53 
   3  -4  -6    9.48    0.64 
   3  -4  -6    9.64    0.59 
  -4   4   6    1.44    0.38 
  -4  -4  -6    1.76    0.41 
   4   4  -6    1.61    0.36 
  -4   4   6    1.35    0.32 
   4  -4   6    1.66    0.30 
  -4  -4  -6    1.68    0.27 
   4  -4   6    1.96    0.41 
  -4  -4   6    1.13    0.33 
   4   4   6    2.07    0.28 
  -4   4  -6    1.61    0.37 
  -4  -4   6    2.04    0.38 
   4  -4  -6    2.62    0.42 
   4   4   6    1.31    0.37 
  -5   4   6   12.28    0.83 
   5  -4   6   11.76    0.79 
  -5   4   6   13.48    0.76 
   5  -4   6   12.31    0.69 
   5   4  -6   13.54    0.83 
  -5  -4  -6   13.04    0.88 
   5   4   6   12.88    0.85 
  -5   4  -6   11.78    0.87 
  -5  -4   6   11.10    0.79 
  -5  -4   6   13.62    0.80 
   5  -4  -6   12.79    0.84 
   6   4  -6    0.43    0.25 
  -6  -4  -6    0.15    0.32 
   6  -4   6   -0.02    0.28 
  -6   4   6   -0.11    0.24 
   6   4  -6    0.10    0.32 
  -6   4   6    0.10    0.29 
  -6  -4   6    0.20    0.29 
  -6   4  -6   -0.09    0.32 
   6   4   6    0.19    0.32 
   6  -4  -6   -0.14    0.30 
   7   4  -6   10.64    0.88 
  -7   4   6   10.17    0.86 
   7  -4   6   10.20    0.84 
  -7  -4  -6   11.19    0.94 
   7   4  -6    9.38    0.78 
  -7   4   6   11.04    0.82 
  -7   4  -6   12.36    0.98 
   7   4   6   10.89    0.88 
   7  -4  -6    9.11    0.86 
  -7  -4   6    9.20    0.84 
   8   4  -6    7.59    0.80 
  -8  -4  -6    7.55    0.89 
  -8   4   6    7.78    0.81 
   8  -4   6    8.32    0.84 
   8   4   6    7.65    0.85 
   8  -4  -6    8.19    0.88 
  -8   4  -6    8.29    0.90 
  -8  -4   6    7.34    0.84 
   9  -4   6   -0.39    0.37 
  -9   4   6    0.01    0.41 
   9   4  -6    0.30    0.38 
  -9   4  -6    0.70    0.50 
   9   4   6    0.26    0.43 
   0   5  -6    0.43    0.22 
   0  -5  -6    0.59    0.26 
   0  -5  -6    0.89    0.23 
   0  -5   6    0.69    0.26 
   0   5   6    0.74    0.26 
   0   5   6    0.75    0.24 
   0   5  -6    0.66    0.25 
   0  -5   6    0.67    0.17 
   1   5  -6   16.81    0.65 
  -1  -5  -6   16.06    0.65 
  -1   5   6   15.46    0.80 
   1  -5   6   14.41    0.75 
  -1  -5  -6   16.07    0.82 
  -1   5   6   16.72    0.70 
   1   5  -6   16.18    0.81 
  -1   5  -6   15.36    0.74 
  -1  -5   6   15.11    0.78 
   1   5   6   14.76    0.70 
   1  -5  -6   14.75    0.71 
  -1   5  -6   15.14    0.76 
   1   5   6   15.55    0.79 
  -1  -5   6   14.36    0.62 
   1  -5  -6   15.12    0.76 
   2   5  -6    2.04    0.36 
  -2  -5  -6    2.24    0.29 
  -2  -5  -6    1.84    0.39 
  -2   5   6    2.12    0.40 
   2  -5   6    1.22    0.30 
  -2   5   6    2.45    0.29 
   2   5   6    1.83    0.38 
   2   5   6    2.06    0.30 
   2  -5  -6    2.20    0.38 
  -2  -5   6    2.07    0.32 
  -2  -5   6    1.35    0.33 
   2  -5  -6    2.00    0.34 
  -2   5  -6    1.68    0.37 
  -2   5  -6    2.05    0.34 
  -3  -5  -6   17.78    0.94 
   3  -5   6   17.32    0.79 
   3   5  -6   18.58    0.94 
   3  -5   6   19.17    0.92 
  -3   5   6   18.43    0.98 
   3  -5  -6   18.51    0.84 
  -3  -5   6   19.58    0.88 
  -3   5  -6   18.31    0.96 
  -3  -5   6   19.05    0.90 
   3  -5  -6   17.80    0.88 
   3   5   6   16.18    0.92 
   4  -5   6   19.55    0.86 
  -4   5   6   18.93    1.02 
   4  -5   6   18.14    0.95 
  -4  -5  -6   15.13    0.95 
   4   5  -6   18.73    0.98 
  -4  -5   6   18.62    0.94 
   4  -5  -6   17.21    0.85 
   4  -5  -6   16.66    0.92 
   4   5   6   17.21    0.96 
  -4  -5   6   17.09    0.90 
  -4   5  -6   18.32    1.04 
   5  -5   6    4.14    0.58 
  -5  -5  -6    5.73    0.69 
  -5   5   6    4.14    0.60 
   5   5  -6    3.82    0.58 
   5   5   6    4.06    0.63 
  -5  -5   6    3.94    0.57 
   5  -5  -6    3.84    0.47 
  -5   5  -6    4.52    0.63 
   5  -5  -6    4.12    0.58 
  -5  -5   6    4.96    0.55 
  -6  -5  -6    1.17    0.40 
   6  -5   6   -0.07    0.28 
   6   5  -6    0.49    0.38 
  -6   5   6    0.48    0.37 
   6   5  -6    0.92    0.31 
  -6  -5   6    0.09    0.29 
  -6  -5   6    1.37    0.39 
  -6   5  -6    0.04    0.34 
   6  -5  -6    0.90    0.43 
   6   5   6    0.80    0.41 
  -7   5   6    4.69    0.68 
   7   5  -6    4.65    0.72 
   7   5  -6    4.92    0.68 
  -7  -5  -6    6.35    0.79 
   7  -5   6    4.53    0.69 
  -7   5  -6    4.90    0.77 
   7  -5  -6    4.38    0.73 
  -7  -5   6    5.04    0.76 
   7   5   6    4.12    0.67 
   8   5  -6    4.60    0.77 
  -8   5   6    6.77    0.90 
   8  -5   6    5.60    0.80 
   8   5  -6    5.28    0.76 
  -8  -5  -6    5.34    0.85 
  -8   5  -6    5.36    0.86 
  -8  -5   6    6.56    0.88 
   8   5   6    4.79    0.77 
   8  -5  -6    4.43    0.72 
   0   6  -6   62.02    1.72 
   0   6   6   60.84    1.79 
   0  -6  -6   62.22    1.70 
   0   6   6   59.49    1.74 
   0   6  -6   60.02    1.84 
   0  -6  -6   62.22    1.82 
   0  -6   6   57.80    1.82 
  -1  -6  -6    9.01    0.56 
   1  -6   6    8.81    0.68 
   1   6  -6    9.03    0.66 
  -1  -6  -6    9.20    0.70 
  -1   6   6    9.62    0.70 
  -1   6   6    9.53    0.61 
  -1   6  -6    8.67    0.66 
   1   6   6    8.88    0.61 
   1   6   6    8.97    0.67 
  -1  -6   6    9.90    0.56 
  -1   6  -6    9.02    0.65 
   1  -6  -6    9.69    0.64 
   1  -6  -6   10.17    0.66 
  -1  -6   6    9.20    0.68 
   2  -6   6   62.17    1.92 
  -2  -6  -6   61.73    1.94 
   2   6  -6   62.00    1.94 
  -2   6   6   66.28    2.01 
   2   6   6   60.32    1.73 
   2   6   6   65.33    1.97 
  -2   6  -6   63.83    1.95 
  -2  -6   6   65.15    1.94 
  -2  -6   6   67.44    1.81 
   2  -6  -6   64.19    1.86 
  -2   6  -6   64.05    1.88 
   2  -6  -6   64.98    1.88 
   3   6  -6   12.97    0.87 
  -3   6   6   13.44    0.85 
  -3  -6  -6   13.18    0.87 
   3  -6   6   12.71    0.84 
   3  -6  -6   12.10    0.74 
   3   6   6   13.80    0.88 
  -3  -6   6   12.00    0.76 
  -3   6  -6   13.55    0.76 
  -3  -6   6   12.02    0.78 
  -3   6  -6   12.77    0.87 
   3  -6  -6   14.20    0.84 
  -4   6   6   17.46    1.06 
   4   6  -6   16.85    0.99 
   4  -6   6   17.88    1.01 
  -4  -6  -6   19.59    1.09 
  -4   6  -6   18.87    0.90 
   4  -6  -6   18.51    1.02 
  -4   6  -6   18.85    1.09 
   4  -6  -6   19.15    0.91 
   4   6   6   17.55    1.05 
  -4  -6   6   17.66    0.95 
  -4  -6   6   17.09    0.96 
   5  -6   6    3.20    0.59 
   5   6  -6    3.11    0.58 
  -5  -6  -6    3.51    0.60 
  -5   6   6    2.76    0.56 
   5   6   6    4.15    0.64 
  -5  -6   6    4.49    0.63 
   5  -6  -6    2.63    0.50 
  -5  -6   6    4.10    0.59 
  -5   6  -6    2.95    0.59 
   6   6  -6    8.17    0.85 
   6  -6   6    8.83    0.83 
  -6  -6  -6    6.94    0.85 
  -6   6   6    6.24    0.77 
   6  -6  -6    7.12    0.77 
   6   6   6    6.54    0.84 
  -6   6  -6    7.98    0.88 
  -6  -6   6    6.68    0.71 
  -6  -6   6    4.54    0.68 
   7  -6   6    7.07    0.84 
  -7   6   6    5.44    0.81 
   7   6  -6    8.74    0.79 
  -7  -6  -6    6.77    0.83 
   7   6  -6    7.48    0.88 
   7  -6  -6    6.91    0.85 
   7   6   6    8.35    0.93 
  -7   6  -6    8.55    0.96 
  -7  -6   6    7.21    0.85 
   8   6  -6    2.68    0.58 
   8   6  -6    2.91    0.73 
   0  -7   6    8.24    0.69 
   0   7   6    6.78    0.62 
   0   7  -6    6.92    0.64 
   0  -7  -6    6.50    0.65 
   0   7   6    6.89    0.64 
   0  -7  -6    7.75    0.60 
  -1   7   6    4.25    0.82 
  -1  -7  -6    3.85    0.56 
   1   7  -6    2.85    0.50 
  -1   7   6    4.67    0.56 
   1  -7   6    4.89    0.58 
   1   7   6    4.06    0.54 
   1  -7  -6    4.67    0.53 
  -1  -7   6    3.59    0.54 
  -1   7  -6    3.41    0.51 
   1   7   6    4.32    0.54 
  -1   7  -6    3.63    0.53 
   1  -7  -6    5.94    0.58 
   2  -7   6    7.00    0.67 
  -2  -7  -6    6.03    0.66 
  -2   7   6    6.63    0.67 
   2   7  -6    5.66    0.66 
   2  -7  -6    6.41    0.60 
  -2   7  -6    8.01    0.71 
  -2  -7   6    6.64    0.64 
   2   7   6    5.72    0.66 
  -2   7  -6    5.97    0.60 
   2  -7  -6    6.45    0.60 
   3  -7   6    4.60    0.61 
  -3   7   6    5.64    0.65 
   3   7  -6    6.73    0.72 
  -3  -7  -6    5.38    0.67 
  -3   7  -6    4.24    0.61 
  -3  -7   6    5.15    0.57 
  -3   7  -6    4.67    0.55 
   3  -7  -6    4.86    0.60 
  -3  -7   6    5.64    0.61 
   3   7   6    5.92    0.70 
   4  -7   6   10.96    0.88 
  -4   7   6   11.99    0.94 
  -4  -7  -6    9.59    0.85 
   4   7  -6   12.24    0.95 
  -4   7  -6   11.36    0.93 
  -4  -7   6    8.73    0.76 
   4  -7  -6   12.27    0.88 
  -4  -7   6   10.86    0.81 
   4   7   6   10.36    0.89 
  -5  -7  -6    9.14    0.89 
  -5   7   6    8.43    0.89 
   5  -7   6    7.71    0.80 
   5   7  -6    9.20    0.89 
  -5  -7   6    8.46    0.77 
   5   7   6    9.52    0.90 
   5  -7  -6    8.62    0.83 
  -5  -7   6    8.29    0.81 
  -5   7  -6    8.37    0.89 
  -6  -7  -6    4.03    0.72 
   6  -7   6    5.55    0.78 
   6   7  -6    4.86    0.77 
  -6   7   6    4.65    0.76 
  -6   7  -6    4.81    0.79 
  -6  -7   6    5.71    0.77 
   6   7   6    3.98    0.74 
  -6  -7   6    6.31    0.74 
   6  -7  -6    5.03    0.76 
   7  -7   6    2.35    0.92 
   7   7  -6    2.26    0.65 
   7   7  -6    3.73    0.65 
  -7  -7   6    2.47    0.62 
   0   8   6   11.09    0.82 
   0   8  -6   10.81    0.83 
   0   8   6   11.22    0.80 
   0  -8  -6   10.24    0.82 
   0  -8   6   10.54    0.85 
  -1  -8  -6    1.39    0.43 
   1   8  -6    0.73    0.34 
  -1   8   6    1.78    0.45 
   1  -8   6    1.89    0.48 
   1   8   6    1.79    0.46 
   1  -8  -6    1.84    0.43 
  -1  -8   6    1.06    0.39 
   1  -8  -6    1.13    0.38 
  -1   8  -6    1.57    0.40 
  -2  -8  -6   10.50    0.86 
   2   8  -6   10.90    0.90 
   2  -8   6   10.78    0.87 
  -2   8   6   12.89    0.95 
  -2   8  -6   10.86    0.81 
   2  -8  -6   10.04    0.80 
   2   8   6    9.34    0.84 
  -2   8  -6   10.91    0.87 
  -2  -8   6   11.23    0.86 
   3  -8   6    4.03    0.62 
   3   8  -6    5.24    0.74 
  -3   8   6    4.45    0.67 
  -3  -8  -6    4.13    0.65 
   3  -8  -6    5.22    0.63 
  -3   8  -6    4.43    0.70 
  -3  -8   6    6.29    0.70 
  -3   8  -6    4.81    0.58 
   3   8   6    3.95    0.65 
   4   8  -6    6.42    0.85 
  -4  -8  -6    5.18    0.77 
  -4   8   6    4.84    0.72 
   4  -8   6    4.41    0.68 
   4  -8  -6    5.05    0.72 
  -4  -8   6    4.42    0.64 
  -4   8  -6    4.39    0.73 
   4   8   6    5.40    0.80 
  -5  -8  -6    5.43    0.80 
   5   8  -6    4.19    0.72 
  -5   8   6    6.31    0.87 
   5  -8   6    5.68    0.79 
  -5  -8   6    6.15    0.75 
   5  -8  -6    6.57    0.85 
  -5  -8   6    3.81    0.65 
  -5   8  -6    6.89    0.94 
   5   8   6    6.20    0.86 
  -6  -8   6   -0.22    0.32 
  -6  -8   6   -0.10    0.36 
   6  -8  -6    0.10    0.48 
   0  -9   6    3.19    0.61 
   0   9  -6    3.54    0.60 
   1   9  -6    2.64    0.59 
  -1   9   6    2.56    0.54 
  -1  -9  -6    3.00    0.58 
   1  -9   6    1.82    0.53 
   1   9   6    2.00    0.52 
  -1   9  -6    2.10    0.51 
  -1  -9   6    3.39    0.68 
   2   9  -6    4.14    0.68 
  -2   9   6    2.83    0.59 
   2  -9   6    3.63    0.64 
  -2  -9  -6    3.01    0.59 
   2  -9  -6    3.92    0.63 
  -2   9  -6    3.97    0.62 
   2   9   6    4.02    0.69 
  -2  -9   6    3.99    0.68 
   3   9  -6    3.28    0.64 
   3  -9   6    3.92    0.69 
  -3  -9  -6    2.49    0.59 
  -3   9   6    3.12    0.61 
   3   9   6    1.97    0.57 
  -3  -9   6    2.46    0.57 
   3  -9  -6    2.08    0.54 
  -3   9  -6    2.96    0.62 
  -4   9   6    5.79    0.84 
   4   9  -6    5.20    0.84 
  -4  -9  -6    5.98    0.84 
   4  -9   6    6.79    0.90 
   4   9   6    7.24    0.96 
  -4  -9   6    5.92    0.79 
  -4   9  -6    6.14    0.86 
   4  -9  -6    8.32    0.90 
  -5  -9   6    2.30    0.58 
   0  10  -6   19.31    1.29 
   0 -10   6   19.60    1.30 
   1  10  -6   23.98    1.41 
   1 -10   6   20.57    1.60 
  -1  10  -6   20.04    1.25 
  -1 -10   6   19.67    1.33 
  -2  10   6   12.06    1.10 
   2  10   6   10.86    1.08 
  -2 -10   6   13.20    1.17 
   0   0   7   -0.04    0.11 
   0   0  -7   -0.07    0.10 
   0   0   7    0.06    0.11 
   0   0   7   -0.04    0.07 
  -1   0   7    1.89    0.24 
  -1   0   7    1.81    0.21 
   1   0   7    2.46    0.16 
   1   0   7    2.30    0.25 
  -1   0  -7    2.04    0.21 
  -1   0   7    2.13    0.23 
  -1   0   7    1.96    0.19 
   1   0   7    2.03    0.24 
  -2   0  -7   27.01    0.84 
   2   0   7   27.57    0.67 
  -2   0   7   27.40    0.77 
   2   0   7   26.18    0.83 
  -2   0   7   27.07    0.85 
  -2   0  -7   27.05    0.78 
   2   0  -7   23.95    0.79 
   2   0  -7   26.72    0.68 
  -3   0   7   78.47    1.80 
   3   0  -7   80.09    1.69 
   3   0   7   79.22    1.74 
  -3   0  -7   81.36    1.93 
  -3   0   7   77.81    1.95 
   3   0   7   79.26    1.92 
   3   0  -7   76.08    1.90 
  -3   0  -7   80.07    1.85 
   4   0   7   88.11    2.22 
  -4   0  -7   89.80    2.22 
  -4   0  -7   91.85    2.17 
   4   0  -7   89.89    2.26 
   4   0  -7   94.27    1.99 
  -4   0   7   94.54    2.11 
   4   0   7   93.60    2.08 
  -4   0   7   87.35    2.26 
   5   0   7   34.29    1.22 
   5   0   7   36.16    1.13 
   5   0  -7   33.30    1.25 
  -5   0   7   36.34    1.29 
  -5   0  -7   35.96    1.22 
  -5   0  -7   35.89    1.18 
  -5   0   7   35.09    1.10 
  -6   0   7   89.53    2.20 
  -6   0  -7   86.12    2.32 
   6   0  -7   83.70    2.41 
   6   0   7   88.12    2.25 
   6   0   7   89.40    2.35 
  -6   0  -7   88.11    2.32 
  -6   0   7   83.32    2.40 
   7   0  -7   35.36    1.46 
  -7   0  -7   35.49    1.37 
  -7   0  -7   38.42    1.40 
  -7   0   7   36.97    1.49 
   7   0   7   35.54    1.33 
   7   0   7   34.81    1.37 
  -8   0  -7    3.86    0.57 
   8   0  -7    4.68    0.71 
   8   0   7    5.15    0.63 
  -8   0   7    4.86    0.69 
   9   0  -7   -0.04    0.32 
  -9   0   7   -0.18    0.35 
   0  -1  -7   55.34    1.34 
   0   1   7   56.99    1.28 
   0  -1   7   53.81    1.32 
   0  -1   7   57.94    1.23 
   0   1   7   54.72    1.35 
   0   1  -7   56.18    1.31 
   0  -1  -7   56.47    1.16 
   0  -1   7   55.94    1.28 
  -1   1   7   77.70    1.83 
  -1   1   7   80.87    1.84 
  -1   1   7   83.90    1.65 
  -1  -1  -7   78.96    1.82 
   1  -1   7   83.41    1.74 
   1  -1   7   79.97    1.82 
   1   1   7   79.84    1.87 
  -1  -1   7   83.44    1.77 
  -1  -1   7   83.19    1.83 
  -1  -1   7   82.96    1.82 
  -1  -1   7   82.01    1.81 
   1  -1  -7   84.03    1.78 
  -1   1  -7   82.19    1.87 
  -1   1  -7   86.11    1.69 
  -2   1   7    7.67    0.42 
  -2  -1  -7    7.51    0.44 
   2  -1   7    7.26    0.35 
  -2   1   7    7.21    0.43 
   2  -1   7    7.78    0.42 
   2   1  -7    7.35    0.36 
  -2  -1   7    8.52    0.44 
   2  -1  -7    7.94    0.24 
   2   1   7    8.54    0.44 
   2   1   7    8.20    0.24 
   2  -1  -7    7.49    0.42 
  -2   1  -7    7.88    0.44 
   2   1   7    7.26    0.39 
  -2  -1   7    8.21    0.34 
  -2   1  -7    8.33    0.33 
  -2  -1   7    7.70    0.42 
  -3  -1  -7   18.36    0.68 
  -3   1   7   18.81    0.70 
   3  -1   7   17.54    0.63 
   3   1  -7   18.23    0.63 
   3  -1   7   17.45    0.69 
  -3  -1  -7   17.43    0.70 
   3   1  -7   17.28    0.71 
   3  -1  -7   18.04    0.72 
  -3   1  -7   18.49    0.61 
   3   1   7   18.74    0.55 
   3  -1  -7   18.42    0.43 
   3   1   7   17.95    0.73 
  -3  -1   7   17.89    0.56 
  -3   1  -7   17.61    0.72 
  -4  -1  -7    3.25    0.35 
  -4   1   7    2.65    0.36 
   4   1  -7    3.92    0.35 
   4  -1   7    3.11    0.35 
  -4   1   7    3.50    0.37 
   4   1  -7    3.19    0.37 
   4  -1   7    4.00    0.38 
  -4  -1  -7    3.33    0.39 
  -4   1  -7    3.48    0.34 
   4   1   7    3.76    0.38 
  -4   1  -7    3.11    0.37 
  -4  -1   7    3.41    0.41 
   4  -1  -7    2.07    0.33 
   4   1   7    3.56    0.30 
  -4  -1   7    3.58    0.27 
   5  -1   7   14.70    0.74 
   5  -1   7   14.45    0.70 
  -5   1   7   15.19    0.80 
  -5  -1  -7   14.61    0.72 
  -5   1   7   14.76    0.74 
   5   1  -7   15.11    0.69 
  -5  -1  -7   14.08    0.77 
   5   1  -7   14.64    0.78 
   5   1   7   13.93    0.64 
  -5  -1   7   15.36    0.59 
   5   1   7   13.79    0.76 
   5  -1  -7   13.93    0.79 
  -5  -1   7   14.05    0.79 
  -5   1  -7   14.97    0.68 
  -5   1  -7   15.34    0.81 
  -6  -1  -7   17.86    0.93 
  -6   1   7   16.28    0.92 
   6   1  -7   16.46    0.93 
  -6   1   7   18.09    0.87 
   6  -1   7   18.80    0.89 
  -6  -1  -7   19.00    0.87 
   6  -1   7   19.45    0.89 
  -6  -1   7   17.38    0.94 
   6   1   7   17.82    0.91 
   6   1   7   17.58    0.80 
  -6   1  -7   19.08    0.85 
   6  -1  -7   17.20    0.96 
  -6   1  -7   18.10    0.95 
  -7   1   7   18.96    1.10 
  -7   1   7   18.03    1.03 
  -7  -1  -7   18.33    1.00 
   7  -1   7   18.40    0.96 
   7  -1   7   18.97    0.94 
   7   1  -7   18.85    1.06 
   7  -1  -7   19.19    1.06 
   7   1   7   18.47    1.00 
  -7  -1   7   18.03    1.05 
  -7   1  -7   18.55    1.01 
   8  -1   7    1.12    0.41 
  -8   1   7    2.34    0.50 
  -8  -1  -7    2.38    0.52 
   8   1  -7    1.41    0.46 
  -8  -1   7    2.31    0.52 
   8   1   7    2.41    0.52 
   8  -1  -7    1.94    0.51 
  -8   1  -7    2.00    0.49 
  -9  -1  -7    4.24    0.70 
  -9   1   7    3.76    0.68 
   9   1  -7    2.99    0.60 
   9  -1  -7    2.79    0.61 
  -9  -1   7    2.12    0.57 
   0  -2   7    5.91    0.26 
   0  -2  -7    6.00    0.27 
   0  -2   7    6.68    0.37 
   0   2   7    5.26    0.35 
   0   2  -7    5.46    0.33 
   0   2   7    5.86    0.32 
   0  -2  -7    5.21    0.37 
   0  -2   7    6.08    0.37 
   1  -2   7  162.88    3.41 
  -1   2   7  164.95    3.46 
   1  -2   7  161.87    3.37 
  -1  -2  -7  165.74    3.09 
  -1  -2  -7  164.18    3.45 
   1   2  -7  162.43    3.40 
   1   2  -7  164.62    3.25 
  -1   2   7  163.61    3.19 
   1   2   7  162.70    3.41 
  -1  -2   7  167.79    3.33 
  -1   2  -7  164.38    3.43 
   1   2   7  162.12    3.40 
   1  -2  -7  168.24    3.33 
  -1  -2   7  162.86    3.41 
   1  -2  -7  162.56    3.44 
  -2  -2  -7    2.68    0.33 
   2   2  -7    2.84    0.19 
   2   2  -7    3.10    0.29 
  -2   2   7    3.15    0.34 
   2  -2   7    3.15    0.30 
  -2   2   7    2.64    0.31 
   2  -2   7    2.66    0.28 
  -2  -2   7    1.77    0.26 
  -2   2  -7    2.66    0.31 
   2   2   7    1.95    0.28 
   2   2   7    2.18    0.25 
  -2   2  -7    2.88    0.14 
  -2  -2   7    2.50    0.29 
   2  -2  -7    3.20    0.32 
   2   2   7    2.75    0.14 
  -3   2   7   10.90    0.58 
  -3   2   7   11.97    0.61 
  -3  -2  -7   11.08    0.53 
   3   2  -7   10.87    0.54 
   3  -2   7   11.36    0.55 
   3  -2   7   10.42    0.54 
  -3  -2  -7   10.84    0.60 
   3   2   7   11.50    0.39 
  -3  -2   7   11.92    0.60 
  -3   2  -7   11.41    0.39 
   3   2   7   11.37    0.61 
  -3  -2   7   11.92    0.60 
   3  -2  -7   11.21    0.59 
  -3  -2   7   11.11    0.35 
  -3   2  -7   11.17    0.62 
  -4   2   7   10.05    0.60 
  -4  -2  -7    9.20    0.62 
   4  -2   7    7.92    0.52 
  -4  -2  -7    9.77    0.52 
   4  -2   7    8.84    0.52 
   4   2  -7    8.41    0.57 
   4   2  -7    8.20    0.53 
  -4   2   7    9.29    0.59 
   4   2   7   10.77    0.46 
   4  -2  -7   10.32    0.65 
  -4   2  -7    9.01    0.61 
   4   2   7    8.44    0.60 
  -4   2  -7    9.67    0.44 
  -4  -2   7    9.81    0.62 
  -5  -2  -7    4.28    0.52 
   5  -2   7    4.14    0.44 
  -5   2   7    4.96    0.51 
   5  -2   7    4.75    0.50 
   5   2  -7    5.01    0.48 
  -5  -2  -7    4.82    0.43 
   5   2  -7    3.35    0.47 
  -5   2   7    6.16    0.53 
  -5   2  -7    4.23    0.55 
   5  -2  -7    4.62    0.55 
  -5  -2   7    4.26    0.52 
   5   2   7    4.31    0.52 
   5   2   7    4.48    0.38 
  -6  -2  -7    3.44    0.43 
   6   2  -7    3.27    0.50 
   6   2  -7    4.26    0.51 
   6  -2   7    3.87    0.51 
  -6   2   7    4.05    0.52 
  -6   2   7    2.97    0.47 
   6  -2   7    4.09    0.47 
  -6  -2  -7    1.98    0.44 
   6  -2  -7    2.56    0.51 
   6   2   7    3.18    0.50 
  -6   2  -7    3.74    0.54 
  -6  -2   7    2.94    0.50 
   7   2  -7    1.04    0.36 
  -7   2   7    0.69    0.33 
   7  -2   7    0.66    0.27 
  -7   2   7    0.20    0.26 
  -7  -2  -7    0.58    0.35 
   7  -2   7    0.63    0.34 
   7  -2  -7    0.36    0.37 
  -7  -2   7    1.18    0.38 
   7   2   7    0.93    0.36 
  -7   2  -7    1.05    0.42 
   8  -2   7   11.64    0.90 
   8   2  -7   12.26    0.94 
  -8   2   7   11.64    0.92 
  -8  -2  -7   12.38    0.96 
   8   2   7   13.07    0.93 
  -8  -2   7   12.79    0.98 
   8  -2  -7   11.89    0.98 
  -8   2  -7   11.33    0.92 
  -9   2   7    8.33    0.87 
   9   2  -7    9.61    0.93 
   9  -2   7    9.49    1.03 
  -9  -2  -7    9.22    0.92 
  -9  -2   7    9.10    0.96 
   9  -2  -7   10.57    1.03 
  -9   2  -7    9.98    0.96 
   9   2   7    9.14    0.88 
   0   3   7    0.50    0.17 
   0   3  -7    0.50    0.16 
   0   3  -7    0.36    0.16 
   0  -3   7    0.42    0.11 
   0  -3  -7    0.33    0.20 
   0  -3   7    0.58    0.18 
   0   3   7    0.62    0.20 
   0  -3  -7    0.50    0.14 
  -1  -3  -7   31.40    0.77 
   1   3  -7   30.86    1.00 
  -1   3   7   32.84    1.04 
   1   3  -7   30.97    0.83 
   1  -3   7   31.87    0.99 
   1  -3   7   31.99    0.99 
  -1   3   7   31.80    0.83 
   1  -3  -7   31.67    1.01 
   1   3   7   33.03    1.00 
  -1  -3   7   32.48    0.90 
  -1   3  -7   31.53    0.99 
   1   3   7   32.02    0.98 
   1  -3  -7   31.34    0.92 
  -1  -3   7   32.40    1.01 
   2  -3   7   46.57    1.33 
  -2   3   7   47.60    1.40 
  -2  -3  -7   48.78    1.08 
   2   3  -7   48.65    1.07 
   2  -3   7   47.91    1.35 
   2   3  -7   48.81    1.37 
  -2   3   7   48.86    1.04 
  -2  -3  -7   48.06    1.42 
   2   3   7   47.43    1.38 
  -2  -3   7   46.59    1.36 
  -2  -3   7   47.51    1.30 
   2  -3  -7   48.69    1.32 
   2  -3  -7   48.39    1.35 
   2   3   7   48.22    1.29 
  -2   3  -7   46.49    1.38 
   3  -3   7   20.21    0.80 
  -3   3   7   20.40    0.84 
   3  -3   7   21.30    0.84 
  -3  -3  -7   22.12    0.92 
   3   3  -7   20.86    0.84 
  -3   3   7   20.80    0.90 
  -3  -3   7   19.99    0.82 
   3  -3  -7   18.99    0.83 
   3   3   7   20.69    0.88 
  -3  -3   7   20.27    0.83 
   3   3   7   20.05    0.59 
  -3   3  -7   20.37    0.87 
   3   3   7   19.65    0.73 
  -4  -3  -7   13.40    0.61 
   4   3  -7   12.09    0.69 
   4  -3   7   13.00    0.71 
  -4   3   7   13.53    0.71 
   4  -3   7   12.10    0.65 
  -4   3   7   13.52    0.77 
  -4  -3  -7   13.19    0.78 
  -4   3  -7   11.92    0.74 
   4   3   7   13.90    0.53 
  -4  -3   7   13.72    0.74 
   4  -3  -7   12.20    0.74 
   4   3   7   12.56    0.76 
  -4  -3   7   12.59    0.73 
   5   3  -7   10.01    0.67 
  -5   3   7    9.47    0.65 
  -5  -3  -7    9.85    0.56 
   5  -3   7    9.26    0.67 
  -5  -3  -7    8.76    0.73 
  -5   3   7   10.10    0.71 
   5   3  -7    8.26    0.64 
   5  -3   7    8.83    0.59 
  -5   3  -7    9.86    0.76 
   5   3   7    9.25    0.71 
   5  -3  -7   10.68    0.75 
  -5  -3   7    8.93    0.69 
   6  -3   7   17.73    0.93 
  -6  -3  -7   16.45    0.99 
  -6   3   7   16.43    0.94 
   6   3  -7   17.35    0.91 
   6   3  -7   16.80    0.94 
  -6   3   7   16.61    0.90 
   6  -3   7   16.16    0.83 
   6   3   7   17.01    0.98 
  -6  -3   7   16.75    0.99 
   6  -3  -7   17.81    1.01 
  -6   3  -7   17.68    1.03 
  -7   3   7   12.12    0.84 
   7   3  -7   11.40    0.83 
  -7   3   7   10.56    0.81 
   7  -3   7   10.34    0.79 
  -7  -3  -7    9.70    0.86 
   7   3   7   11.12    0.86 
  -7   3  -7   12.97    0.95 
   7  -3  -7    9.32    0.85 
  -7  -3   7   12.11    0.91 
  -8   3   7    6.95    0.78 
   8   3  -7    6.51    0.78 
  -8  -3  -7    7.96    0.87 
  -8   3   7    7.91    0.79 
   8  -3   7    8.08    0.77 
  -8   3  -7    7.44    0.80 
  -8  -3   7    5.87    0.80 
   8  -3  -7    8.26    0.87 
   8   3   7    7.79    0.82 
   9   3  -7   15.19    1.15 
   9  -3   7   13.92    1.05 
  -9   3   7   12.25    1.51 
  -9  -3  -7   15.25    1.16 
   9   3   7   11.21    1.00 
  -9  -3   7   12.45    1.11 
   9  -3  -7   11.47    1.11 
  -9   3  -7   13.03    1.10 
   0  -4   7   10.74    0.41 
   0  -4  -7    9.67    0.58 
   0   4  -7   10.14    0.57 
   0   4   7   10.64    0.53 
   0   4  -7   10.88    0.54 
   0   4   7    9.56    0.56 
   0  -4   7    9.93    0.56 
   0  -4  -7   11.05    0.49 
  -1  -4  -7   26.02    0.76 
  -1   4   7   24.53    0.95 
   1  -4   7   26.57    0.94 
   1  -4   7   24.42    0.93 
  -1   4   7   25.05    0.79 
   1   4  -7   26.88    0.98 
   1   4  -7   26.31    0.79 
  -1   4  -7   27.05    0.96 
   1   4   7   27.01    0.95 
   1  -4  -7   25.48    0.87 
  -1   4  -7   25.62    0.94 
   1   4   7   25.45    0.91 
   1  -4  -7   25.41    0.94 
  -1  -4   7   27.05    0.82 
  -2  -4  -7   64.21    1.46 
  -2   4   7   60.54    1.77 
  -2   4   7   63.01    1.43 
  -2  -4  -7   63.50    1.80 
   2  -4   7   64.41    1.71 
   2  -4   7   63.88    1.76 
   2   4  -7   63.65    1.76 
   2  -4  -7   65.00    1.70 
  -2  -4   7   64.09    1.65 
   2   4   7   60.70    1.74 
   2  -4  -7   63.00    1.71 
  -2   4  -7   61.59    1.74 
   2   4   7   62.81    1.62 
   3   4  -7   91.09    2.34 
   3  -4   7   89.70    2.33 
   3  -4   7   91.82    2.26 
  -3   4   7   91.28    2.41 
  -3  -4  -7   88.99    2.38 
  -3  -4   7   90.57    2.31 
   3   4   7   96.14    2.20 
   3  -4  -7   92.83    2.32 
  -3  -4   7   92.75    2.36 
   3  -4  -7   91.31    2.34 
  -3   4  -7   93.65    2.44 
   3   4   7   89.78    2.39 
   4  -4   7   33.02    1.14 
  -4   4   7   31.05    1.27 
   4  -4   7   32.68    1.23 
  -4  -4  -7   31.68    1.30 
  -4   4   7   33.71    1.21 
   4   4  -7   34.15    1.25 
   4   4   7   29.79    1.24 
  -4   4  -7   31.93    1.28 
  -4  -4   7   31.56    1.21 
   4  -4  -7   30.98    1.22 
  -4  -4   7   31.31    1.20 
   5  -4   7    7.24    0.56 
   5  -4   7    7.36    0.65 
  -5   4   7    7.83    0.71 
  -5  -4  -7    7.90    0.73 
  -5   4   7    7.63    0.60 
   5   4  -7    6.66    0.64 
  -5  -4   7    6.95    0.62 
   5   4   7    6.55    0.68 
   5  -4  -7    9.03    0.75 
  -5  -4   7    7.42    0.66 
  -5   4  -7    8.29    0.75 
  -6  -4  -7   22.71    1.22 
   6   4  -7   25.33    1.17 
   6   4  -7   23.21    1.14 
  -6   4   7   22.96    1.18 
   6  -4   7   26.57    1.22 
  -6   4   7   24.76    1.14 
  -6  -4   7   24.28    1.21 
   6   4   7   22.91    1.19 
  -6   4  -7   25.79    1.28 
   6  -4  -7   24.00    1.21 
   7  -4   7   12.73    0.94 
   7   4  -7   17.63    1.02 
  -7   4   7   16.99    1.01 
  -7  -4  -7   16.19    1.07 
   7   4  -7   14.96    0.98 
  -7   4   7   14.33    0.99 
   7  -4  -7   15.74    1.07 
  -7  -4   7   15.32    1.04 
   7   4   7   15.88    1.06 
  -7   4  -7   15.94    1.10 
   8  -4   7    5.09    0.74 
  -8   4   7    5.42    0.74 
  -8  -4  -7    4.68    0.77 
   8   4  -7    3.47    0.59 
   8   4   7    5.05    0.76 
  -8  -4   7    5.48    0.81 
   8  -4  -7    4.10    0.70 
  -8   4  -7    3.13    0.68 
  -9   4   7    0.18    0.44 
   9   4  -7    0.13    0.39 
   9  -4   7   -0.23    0.42 
  -9   4  -7    0.32    0.47 
   9   4   7   -0.14    0.41 
   0  -5   7   12.95    0.52 
   0   5  -7   13.15    0.73 
   0  -5  -7   12.90    0.74 
   0  -5  -7   12.98    0.61 
   0  -5   7   15.12    0.76 
   0   5   7   13.16    0.71 
   0   5   7   12.39    0.66 
   0   5  -7   13.02    0.66 
   1   5  -7   30.39    0.93 
  -1   5   7   28.08    1.11 
   1   5  -7   27.23    1.08 
  -1  -5  -7   27.34    1.10 
  -1  -5  -7   27.78    0.90 
   1  -5   7   26.85    1.07 
  -1   5   7   28.42    0.95 
   1   5   7   28.27    1.06 
  -1   5  -7   27.74    1.05 
   1   5   7   28.79    1.03 
   1  -5  -7   27.98    1.07 
  -1  -5   7   27.62    0.90 
  -1  -5   7   27.13    1.06 
   1  -5  -7   28.18    0.99 
  -1   5  -7   27.44    1.05 
   2   5  -7    0.06    0.23 
  -2   5   7    0.15    0.23 
  -2  -5  -7    0.07    0.27 
  -2  -5  -7    0.11    0.19 
   2  -5   7    0.10    0.22 
   2  -5  -7    0.02    0.24 
   2   5   7   -0.08    0.26 
   2   5   7   -0.10    0.15 
  -2   5  -7   -0.01    0.25 
  -2   5  -7    0.27    0.21 
  -2  -5   7    0.39    0.24 
   2  -5  -7   -0.11    0.19 
  -2  -5   7    0.13    0.18 
   3  -5   7    2.08    0.36 
   3  -5   7    1.41    0.35 
  -3  -5  -7    1.86    0.43 
   3   5  -7    1.69    0.39 
  -3   5   7    2.19    0.43 
   3  -5  -7    1.33    0.32 
   3   5   7    1.69    0.42 
  -3  -5   7    0.93    0.30 
   3  -5  -7    1.62    0.37 
  -3   5  -7    1.66    0.39 
  -3  -5   7    1.12    0.30 
   3   5   7    1.68    0.30 
   4   5  -7   20.21    1.04 
   4  -5   7   20.46    0.92 
  -4  -5  -7   21.78    1.11 
   4  -5   7   21.89    1.05 
  -4   5   7   20.78    1.07 
   4   5   7   20.56    1.07 
   4  -5  -7   21.35    1.02 
  -4  -5   7   20.32    1.00 
   4  -5  -7   19.09    0.91 
  -4  -5   7   19.02    0.97 
  -4   5  -7   21.32    1.07 
   5  -5   7    3.56    0.47 
  -5   5   7    4.53    0.65 
  -5  -5  -7    3.92    0.59 
   5   5  -7    4.28    0.59 
   5  -5   7    4.22    0.60 
  -5  -5   7    3.29    0.53 
   5  -5  -7    5.59    0.66 
   5  -5  -7    3.37    0.47 
  -5   5  -7    3.74    0.60 
   5   5   7    4.41    0.61 
  -5  -5   7    3.18    0.48 
  -6   5   7    2.08    0.48 
  -6   5   7    1.95    0.43 
  -6  -5  -7    1.94    0.52 
   6   5  -7    1.67    0.46 
   6  -5   7    1.25    0.42 
  -6  -5   7    1.69    0.41 
   6   5   7    1.82    0.48 
  -6   5  -7    2.24    0.52 
   6  -5  -7    2.99    0.56 
  -6  -5   7    2.20    0.48 
  -7   5   7    1.60    0.46 
  -7  -5  -7    2.77    0.59 
   7   5  -7    2.56    0.59 
   7  -5   7    2.34    0.54 
   7   5  -7    1.88    0.48 
   7   5   7    1.52    0.48 
  -7   5  -7    2.64    0.63 
   7  -5  -7    3.60    0.66 
  -7  -5   7    2.29    0.56 
   8   5  -7    1.49    0.92 
   8  -5   7    0.99    0.48 
   8   5  -7    1.18    0.47 
  -8  -5  -7    1.68    0.55 
  -8   5   7    1.70    0.56 
  -8   5  -7    1.12    0.48 
   8  -5  -7    2.47    0.61 
   8   5   7    1.61    0.54 
  -8  -5   7    0.31    0.38 
   0   6   7    0.25    0.26 
   0   6   7    0.47    0.26 
   0  -6  -7    0.14    0.21 
   0  -6  -7   -0.15    0.25 
   0  -6   7    0.04    0.23 
   0   6  -7    0.11    0.23 
   0   6  -7    0.79    0.29 
   1  -6   7   94.78    2.54 
  -1   6   7   95.76    2.32 
  -1  -6  -7   90.45    2.50 
  -1   6   7   91.38    2.51 
  -1  -6  -7   97.32    2.28 
   1   6  -7   91.49    2.52 
   1   6   7   96.93    2.51 
   1   6   7   97.57    2.46 
   1  -6  -7   98.26    2.44 
   1  -6  -7   96.89    2.52 
  -1  -6   7   96.14    2.57 
  -1   6  -7   92.20    2.52 
  -1   6  -7   96.10    2.49 
  -2  -6  -7   10.41    0.78 
   2  -6   7   12.37    0.79 
   2   6  -7   11.66    0.80 
  -2   6   7   11.17    0.80 
   2   6   7   12.09    0.80 
   2  -6  -7   11.10    0.70 
  -2   6  -7    9.29    0.74 
  -2  -6   7   10.74    0.64 
   2   6   7   10.59    0.63 
  -2  -6   7   10.06    0.71 
   2  -6  -7   11.23    0.72 
  -2   6  -7   10.66    0.69 
  -3  -6  -7   19.59    1.06 
   3  -6   7   21.28    1.06 
   3   6  -7   19.41    1.04 
  -3   6   7   19.88    1.05 
   3  -6  -7   19.18    0.97 
  -3   6  -7   18.77    0.92 
   3   6   7   19.94    1.06 
  -3   6  -7   20.05    1.07 
  -3  -6   7   18.06    0.90 
  -3  -6   7   19.52    0.99 
   3  -6  -7   19.05    0.94 
  -4  -6  -7   11.93    0.89 
   4  -6   7   11.49    0.84 
   4   6  -7   11.22    0.85 
  -4   6   7   11.86    0.87 
   4  -6  -7   14.06    0.90 
   4   6   7   11.81    0.85 
  -4  -6   7   13.26    0.85 
  -4   6  -7   12.42    0.76 
  -4   6  -7   11.91    0.92 
   4  -6  -7   13.86    0.79 
  -4  -6   7   12.32    0.80 
  -5   6   7    1.91    0.50 
   5  -6   7    2.16    0.49 
  -5  -6  -7    1.97    0.51 
   5   6  -7    1.91    0.48 
  -5  -6   7    2.34    0.48 
  -5   6  -7    2.31    0.54 
   5   6   7    1.95    0.48 
   5  -6  -7    1.32    0.41 
  -5  -6   7    2.52    0.49 
  -6  -6  -7    2.04    0.53 
   6   6  -7    1.05    0.46 
  -6   6   7    1.66    0.50 
   6  -6   7    2.01    0.49 
   6  -6  -7    2.49    0.56 
   6   6   7    1.30    0.49 
  -6  -6   7    1.99    0.49 
  -6  -6   7    2.03    0.48 
  -6   6  -7    2.17    0.58 
   7  -6   7   -0.14    0.35 
  -7  -6  -7   -0.25    0.39 
   7   6  -7   -0.32    0.24 
   7   6  -7    0.66    0.45 
  -7   6   7    0.12    0.43 
   7  -6  -7   -0.14    0.36 
  -7  -6   7   -0.38    0.32 
  -7   6  -7    0.66    0.48 
   7   6   7    0.52    0.43 
   8   6  -7    0.47    0.51 
   8   6  -7    0.05    0.34 
   0  -7  -7    7.93    0.60 
   0  -7   7    8.58    0.72 
   0   7   7    7.71    0.64 
   0   7   7    6.82    0.62 
   0   7  -7    8.88    0.70 
   0  -7  -7    8.54    0.70 
  -1   7   7   25.22    1.18 
   1   7  -7   23.29    1.17 
  -1  -7  -7   25.47    1.19 
   1  -7   7   26.32    1.20 
   1   7   7   23.99    1.07 
  -1   7  -7   24.84    1.12 
   1   7   7   25.82    1.15 
   1  -7  -7   24.92    1.07 
  -1  -7   7   22.89    1.14 
   1  -7  -7   26.64    1.15 
  -1   7  -7   24.41    1.13 
  -2   7   7   18.92    1.05 
  -2  -7  -7   19.07    1.06 
   2   7  -7   20.00    1.08 
   2  -7   7   18.64    1.05 
  -2   7  -7   19.79    1.01 
   2  -7  -7   22.02    1.05 
   2   7   7   20.04    1.10 
   2  -7  -7   20.25    1.01 
  -2  -7   7   20.57    1.06 
  -2   7  -7   18.32    1.05 
  -3   7   7    8.95    0.78 
   3  -7   7    9.38    0.79 
   3   7  -7    9.63    0.83 
  -3  -7  -7    8.85    0.80 
   3   7   7    9.21    0.83 
   3  -7  -7    9.03    0.75 
  -3  -7   7    8.11    0.71 
  -3   7  -7    9.58    0.72 
  -3  -7   7    8.87    0.80 
  -3   7  -7    8.94    0.76 
   3  -7  -7    8.37    0.69 
   4   7  -7    2.28    0.51 
  -4   7   7    1.60    0.49 
   4  -7   7    1.28    0.41 
  -4  -7  -7    2.19    0.49 
   4   7   7    1.98    0.53 
  -4   7  -7    2.63    0.46 
  -4  -7   7    2.41    0.47 
   4  -7  -7    1.46    0.45 
  -4   7  -7    2.15    0.50 
  -4  -7   7    1.45    0.40 
   5   7  -7    0.69    0.41 
  -5  -7  -7   -0.17    0.31 
  -5   7   7   -0.24    0.31 
   5  -7   7    0.76    0.36 
  -5   7  -7    0.62    0.42 
  -5  -7   7    0.42    0.34 
  -5  -7   7    0.80    0.35 
   5   7   7    1.02    0.47 
   5  -7  -7    0.56    0.40 
   6   7  -7   -0.34    0.38 
  -6  -7  -7    0.17    0.41 
  -6   7   7    0.12    0.36 
   6  -7   7   -0.35    0.32 
   6  -7  -7   -0.12    0.34 
   6   7   7    0.61    0.44 
  -6  -7   7   -0.62    0.28 
  -6   7  -7    0.29    0.44 
  -6  -7   7    0.36    0.35 
   7   7  -7    4.65    0.71 
   7   7  -7    3.65    0.73 
  -7  -7   7    3.38    0.69 
   0  -8   7    1.89    0.47 
   0   8  -7    1.44    0.44 
   0  -8  -7    2.16    0.48 
   0   8   7    1.65    0.41 
   0   8   7    1.25    0.43 
  -1   8   7    9.15    0.77 
  -1  -8  -7    8.81    0.78 
   1  -8   7    8.18    0.79 
   1   8  -7    9.97    0.84 
   1   8   7    7.70    0.74 
   1  -8  -7    8.44    0.69 
  -1  -8   7    9.20    0.83 
   1  -8  -7    9.32    0.79 
  -1   8  -7    8.88    0.76 
   2   8  -7    3.14    0.57 
  -2   8   7    3.86    0.63 
  -2  -8  -7    4.03    0.63 
   2  -8   7    2.88    0.53 
  -2  -8   7    4.42    0.65 
   2   8   7    4.03    0.62 
  -2   8  -7    3.06    0.59 
  -2   8  -7    3.90    0.58 
   2  -8  -7    4.23    0.60 
   3  -8   7   11.57    0.93 
   3   8  -7   10.26    0.91 
  -3  -8  -7    9.66    0.88 
  -3   8   7   10.14    0.91 
  -3   8  -7   10.35    0.79 
  -3  -8   7   10.14    0.85 
   3   8   7   10.24    0.95 
  -3   8  -7    8.94    0.89 
   3  -8  -7   10.44    0.85 
  -4   8   7    0.90    0.42 
  -4  -8  -7    1.56    0.52 
   4   8  -7    1.14    0.49 
   4  -8   7    1.41    0.47 
  -4   8  -7    1.30    0.49 
   4  -8  -7    0.62    0.39 
  -4  -8   7    0.90    0.36 
   4   8   7    1.56    0.53 
   5  -8   7   -0.48    0.29 
   5   8  -7    0.45    0.41 
  -5  -8  -7    0.26    0.39 
  -5   8   7   -0.25    0.38 
   5  -8  -7   -0.61    0.31 
   5   8   7    0.58    0.47 
  -5   8  -7    0.35    0.45 
  -5  -8   7   -0.17    0.29 
  -6  -8   7    3.84    0.72 
  -6  -8   7    3.37    0.64 
   0  -9   7   23.35    1.31 
   0   9  -7   25.89    1.34 
  -1  -9  -7    0.14    0.37 
  -1   9   7    0.10    0.35 
   1   9  -7    0.76    0.39 
   1  -9   7    0.70    0.41 
  -1  -9   7    0.49    0.40 
  -1   9  -7    0.70    0.38 
   1   9   7   -0.13    0.35 
   2  -9   7    6.48    0.79 
   2   9  -7    8.70    0.90 
  -2  -9  -7    7.03    0.83 
  -2   9   7    7.40    0.83 
  -2  -9   7    6.57    0.81 
  -2   9  -7    7.42    0.79 
   2   9   7    5.86    0.79 
  -3   9   7    0.61    0.47 
  -3  -9  -7    0.97    0.47 
   3  -9   7    0.63    0.44 
   3   9  -7    0.97    0.46 
  -3  -9   7    0.12    0.39 
   3   9   7    0.51    0.44 
   3  -9  -7    0.25    0.40 
  -3   9  -7    0.50    0.44 
   4   9  -7    2.88    1.07 
  -4   9   7    3.99    0.75 
  -4  -9  -7    2.56    0.57 
  -4  -9   7    3.31    0.63 
   4   9   7    4.26    0.80 
  -4   9  -7    2.88    0.70 
   4  -9  -7    4.82    0.74 
   0 -10   7    7.24    1.05 
   0  10  -7    7.56    0.91 
   1  10  -7   21.50    1.41 
  -1  10  -7   20.55    1.30 
  -1 -10   7   23.01    1.62 
  -2  10   7    5.78    0.86 
   2  10   7    4.53    0.78 
   0   0   8    0.96    0.19 
   0   0   8    0.64    0.15 
   0   0   8    0.65    0.12 
   0   0  -8    0.51    0.15 
  -1   0   8  127.14    2.76 
   1   0   8  128.95    2.76 
  -1   0  -8  127.95    2.69 
  -1   0   8  132.38    2.75 
  -1   0   8  131.36    2.70 
  -1   0   8  130.96    2.65 
   1   0   8  133.07    2.80 
   1   0   8  135.89    2.56 
   2   0  -8    7.07    0.40 
  -2   0  -8    7.50    0.39 
   2   0  -8    6.98    0.31 
   2   0   8    7.51    0.30 
  -2   0   8    7.47    0.38 
  -2   0  -8    6.88    0.41 
  -2   0   8    6.80    0.42 
   3   0  -8   15.83    0.68 
  -3   0   8   17.24    0.72 
  -3   0  -8   17.79    0.66 
   3   0   8   16.84    0.55 
   3   0  -8   16.10    0.52 
  -3   0   8   16.14    0.61 
   3   0   8   16.31    0.69 
  -3   0  -8   17.63    0.71 
   4   0   8    5.13    0.45 
  -4   0  -8    4.57    0.43 
   4   0  -8    4.70    0.33 
   4   0  -8    5.14    0.46 
  -4   0   8    5.36    0.48 
   4   0   8    5.06    0.36 
  -4   0   8    4.68    0.37 
  -4   0  -8    5.40    0.43 
   5   0   8  325.39    6.65 
  -5   0  -8  318.38    6.54 
  -5   0   8  317.11    6.73 
   5   0  -8  316.77    6.69 
  -5   0   8  325.56    6.46 
   5   0   8  323.24    6.45 
  -5   0  -8  321.30    6.63 
  -6   0   8  111.63    2.96 
  -6   0  -8  113.87    2.84 
  -6   0  -8  112.75    2.79 
   6   0   8  112.70    2.70 
   6   0   8  111.28    2.84 
   6   0  -8  110.56    2.94 
   7   0   8   26.18    1.17 
   7   0  -8   26.06    1.25 
  -7   0   8   27.14    1.28 
  -7   0  -8   23.28    1.11 
  -7   0  -8   25.30    1.14 
   8   0  -8    1.81    0.49 
  -8   0   8    1.58    0.51 
   8   0   8    1.87    0.44 
   9   0  -8    5.09    0.78 
  -9   0   8    4.92    0.76 
   0  -1   8    6.50    0.37 
   0  -1   8    6.70    0.34 
   0  -1  -8    6.99    0.27 
   0  -1  -8    7.29    0.40 
   0   1   8    6.50    0.39 
   0  -1   8    6.98    0.32 
   0   1   8    6.82    0.34 
   1  -1   8   27.04    0.73 
   1  -1   8   26.81    0.82 
  -1   1   8   25.69    0.83 
  -1   1   8   26.77    0.67 
  -1  -1  -8   26.75    0.81 
  -1  -1   8   25.13    0.77 
   1   1   8   25.71    0.79 
   1  -1  -8   25.78    0.72 
  -1  -1   8   26.27    0.74 
  -1   1  -8   25.39    0.80 
  -1  -1   8   26.79    0.77 
  -1  -1   8   25.70    0.76 
  -1   1  -8   26.53    0.67 
   2  -1   8   11.11    0.53 
  -2  -1  -8   11.58    0.54 
   2  -1   8   11.76    0.46 
  -2   1   8   11.78    0.53 
   2   1  -8   12.61    0.49 
  -2   1   8   12.17    0.34 
  -2   1   8   11.09    0.54 
  -2   1  -8   11.93    0.56 
  -2  -1   8   11.36    0.52 
   2  -1  -8   10.61    0.50 
  -2  -1   8   11.72    0.44 
   2   1   8   12.04    0.29 
  -2  -1   8   12.04    0.54 
   2   1   8   10.76    0.51 
  -2   1  -8   12.39    0.42 
   3  -1   8   19.41    0.66 
  -3   1   8   17.61    0.72 
  -3  -1  -8   19.19    0.73 
   3   1  -8   18.78    0.75 
  -3  -1  -8   19.95    0.76 
   3  -1   8   19.05    0.75 
   3   1  -8   19.21    0.66 
  -3   1   8   18.36    0.76 
   3   1   8   17.12    0.74 
  -3   1  -8   18.06    0.61 
   3  -1  -8   18.58    0.74 
   3  -1  -8   19.36    0.45 
   3   1   8   18.01    0.53 
  -3   1  -8   17.28    0.73 
  -3  -1   8   18.59    0.60 
  -3  -1   8   17.44    0.74 
  -4   1   8    0.43    0.20 
   4  -1   8    0.29    0.20 
  -4  -1  -8    0.22    0.18 
  -4  -1  -8    0.53    0.24 
   4   1  -8    0.03    0.17 
  -4   1   8    0.22    0.21 
   4   1  -8    0.12    0.17 
   4  -1   8    0.07    0.16 
  -4  -1   8    0.12    0.13 
  -4   1  -8    0.34    0.21 
  -4   1  -8    0.46    0.18 
   4   1   8    0.26    0.22 
   4  -1  -8    0.15    0.19 
  -4  -1   8    0.06    0.18 
   4   1   8    0.27    0.15 
   5  -1   8   29.48    1.10 
  -5  -1  -8   30.24    1.15 
   5   1  -8   31.17    1.02 
  -5  -1  -8   30.69    1.10 
   5  -1   8   30.15    1.06 
  -5   1   8   31.89    1.21 
  -5   1   8   30.82    1.09 
   5   1  -8   29.34    1.16 
  -5   1  -8   31.62    1.05 
  -5  -1   8   30.37    1.21 
  -5   1  -8   30.24    1.17 
   5  -1  -8   30.11    1.18 
   5   1   8   31.56    0.98 
   5   1   8   33.02    1.19 
  -6   1   8   37.93    1.30 
  -6  -1  -8   36.23    1.29 
   6   1  -8   38.44    1.44 
  -6   1   8   34.35    1.38 
  -6  -1  -8   37.00    1.38 
   6  -1   8   38.33    1.34 
   6  -1   8   35.64    1.28 
  -6   1  -8   37.08    1.40 
  -6  -1   8   36.78    1.43 
   6  -1  -8   36.63    1.43 
  -6   1  -8   37.06    1.25 
   6   1   8   37.94    1.39 
  -7  -1  -8    3.68    0.54 
  -7  -1  -8    3.03    0.47 
   7  -1   8    3.29    0.48 
   7   1  -8    3.14    0.54 
  -7   1   8    4.26    0.61 
   7  -1   8    3.97    0.53 
   7  -1  -8    3.89    0.59 
  -7  -1   8    3.96    0.62 
  -7   1  -8    3.34    0.52 
   7   1   8    3.72    0.54 
  -8  -1  -8    6.00    0.70 
   8   1  -8    6.90    0.78 
  -8   1   8    7.26    0.77 
   8   1   8    6.69    0.72 
  -8  -1   8    6.62    0.76 
  -8   1  -8    7.08    0.76 
   8  -1  -8    6.54    0.79 
  -9   1   8    4.45    0.74 
   9   1  -8    4.07    0.71 
  -9  -1  -8    4.78    0.73 
   9  -1  -8    3.86    0.71 
  -9  -1   8    3.36    0.66 
   9   1   8    5.57    0.85 
   0  -2   8    4.87    0.33 
   0   2   8    5.07    0.37 
   0  -2  -8    4.97    0.38 
   0  -2  -8    4.86    0.25 
   0   2  -8    4.55    0.32 
   0  -2   8    5.61    0.26 
   0   2   8    4.43    0.30 
  -1  -2  -8    5.23    0.40 
   1  -2   8    6.41    0.38 
   1  -2   8    6.02    0.39 
  -1   2   8    5.73    0.27 
  -1   2   8    6.09    0.41 
   1   2  -8    5.80    0.31 
   1   2  -8    5.86    0.37 
  -1  -2   8    5.37    0.37 
   1  -2  -8    5.36    0.39 
   1   2   8    5.25    0.38 
  -1   2  -8    5.94    0.21 
  -1   2  -8    5.65    0.39 
   1   2   8    5.79    0.38 
   1  -2  -8    6.00    0.34 
  -1  -2   8    5.69    0.33 
  -2  -2  -8   11.52    0.59 
   2  -2   8   10.76    0.50 
  -2   2   8    9.86    0.54 
  -2   2   8   11.08    0.29 
  -2   2   8   11.26    0.57 
   2   2  -8   10.87    0.52 
   2  -2   8   11.85    0.56 
   2   2   8   11.09    0.52 
  -2   2  -8   10.60    0.57 
   2   2   8   11.25    0.57 
  -2   2  -8   11.48    0.32 
  -2  -2   8   11.31    0.40 
   2  -2  -8   11.00    0.52 
  -2  -2   8   10.42    0.52 
   3  -2   8   48.06    1.38 
  -3   2   8   51.04    1.45 
  -3  -2  -8   48.62    1.43 
   3  -2   8   48.30    1.34 
  -3   2   8   50.55    1.44 
   3   2  -8   49.96    1.35 
  -3  -2   8   50.68    1.11 
  -3  -2   8   49.81    1.43 
   3   2   8   48.15    1.35 
   3   2   8   50.03    1.45 
   3   2   8   51.74    1.10 
  -3  -2   8   48.17    1.41 
  -3   2  -8   48.71    1.45 
   3  -2  -8   49.21    1.41 
  -3   2  -8   49.20    1.12 
   4  -2   8   69.53    1.80 
  -4  -2  -8   68.83    1.92 
  -4   2   8   69.47    1.91 
   4   2  -8   69.76    1.90 
  -4   2   8   68.05    1.89 
  -4  -2  -8   70.09    1.79 
   4  -2   8   69.10    1.83 
   4   2  -8   72.23    1.81 
  -4   2  -8   71.79    1.61 
  -4  -2   8   68.14    1.92 
   4   2   8   67.82    1.92 
   4  -2  -8   68.89    1.91 
  -4   2  -8   68.80    1.94 
   4   2   8   72.84    1.60 
  -5   2   8   24.62    1.04 
   5  -2   8   25.74    1.00 
  -5  -2  -8   25.22    0.95 
   5   2  -8   25.43    1.07 
   5  -2   8   25.83    1.00 
  -5  -2  -8   25.40    1.09 
   5   2  -8   25.35    0.97 
  -5   2   8   26.17    1.08 
  -5   2  -8   24.49    1.10 
   5  -2  -8   23.24    1.07 
  -5  -2   8   26.04    1.11 
   5   2   8   24.61    1.08 
  -6  -2  -8   21.49    1.06 
   6   2  -8   21.72    1.05 
   6  -2   8   19.85    0.95 
  -6   2   8   21.47    1.04 
  -6   2   8   22.71    1.03 
   6  -2   8   21.91    0.98 
  -6  -2  -8   22.23    0.94 
   6   2  -8   20.58    0.93 
  -6  -2   8   20.82    1.07 
   6   2   8   20.50    1.04 
   6  -2  -8   19.93    1.07 
  -6   2  -8   22.28    1.09 
  -7   2   8   46.38    1.63 
  -7  -2  -8   44.88    1.70 
  -7   2   8   44.34    1.70 
   7   2  -8   44.14    1.69 
   7  -2   8   47.55    1.59 
   7  -2   8   45.06    1.60 
  -7  -2   8   45.14    1.75 
  -7   2  -8   44.70    1.71 
   7  -2  -8   44.80    1.74 
   7   2   8   44.51    1.67 
  -8   2   8   10.03    0.88 
   8   2  -8   10.74    0.90 
  -8  -2  -8    9.47    0.90 
   8  -2   8   11.82    0.85 
  -8   2  -8    9.43    0.88 
   8  -2  -8    9.87    0.92 
  -8  -2   8    9.04    0.88 
   8   2   8   12.05    0.89 
  -9  -2  -8    7.10    0.85 
  -9   2   8    6.52    0.81 
   9   2  -8    5.87    0.84 
   9  -2  -8    5.51    0.86 
   9   2   8    5.99    0.81 
  -9  -2   8    6.67    0.90 
  -9   2  -8    5.95    0.85 
   0  -3   8   45.36    1.29 
   0   3   8   45.70    1.31 
   0  -3   8   45.60    1.30 
   0   3  -8   46.11    1.22 
   0   3   8   46.36    1.21 
   0  -3  -8   46.61    1.33 
   0  -3   8   46.81    1.06 
   0  -3  -8   47.78    1.12 
  -1  -3  -8   27.74    0.69 
   1  -3   8   27.96    0.93 
  -1   3   8   28.40    0.77 
  -1  -3  -8   26.43    0.96 
   1   3  -8   27.85    0.94 
   1   3  -8   29.57    0.80 
   1  -3   8   26.82    0.93 
  -1  -3   8   27.49    0.81 
   1   3   8   27.99    0.92 
   1  -3  -8   27.42    0.84 
  -1  -3   8   28.57    0.94 
   1   3   8   27.49    0.91 
   1  -3  -8   26.91    0.94 
  -1   3  -8   27.26    0.92 
  -2   3   8   13.45    0.39 
   2  -3   8   13.32    0.63 
  -2   3   8   12.34    0.65 
   2   3  -8   13.10    0.44 
   2  -3   8   13.93    0.64 
  -2  -3  -8   13.87    0.40 
   2   3  -8   12.93    0.63 
  -2  -3  -8   13.02    0.69 
  -2  -3   8   13.50    0.60 
   2   3   8   14.45    0.62 
   2  -3  -8   14.18    0.63 
  -2  -3   8   12.01    0.62 
  -2   3  -8   12.90    0.65 
   2  -3  -8   12.34    0.63 
   2   3   8   12.72    0.65 
   3  -3   8   36.64    1.20 
   3   3  -8   38.23    1.22 
  -3   3   8   37.74    1.27 
  -3   3   8   40.19    1.26 
   3  -3   8   38.29    1.20 
  -3  -3   8   39.18    1.24 
   3   3   8   39.18    1.16 
   3  -3  -8   42.33    1.28 
   3   3   8   38.11    1.30 
  -3  -3   8   37.27    1.25 
  -3   3  -8   37.07    1.30 
   3   3   8   39.72    0.93 
   4  -3   8    8.74    0.58 
  -4   3   8   10.31    0.65 
  -4  -3  -8   11.16    0.73 
   4  -3   8    8.21    0.58 
  -4   3   8    9.97    0.66 
   4   3  -8    9.33    0.61 
  -4  -3  -8    9.82    0.55 
  -4  -3   8    9.72    0.65 
   4  -3  -8    9.55    0.66 
   4   3   8   11.13    0.71 
  -4   3  -8    9.54    0.68 
  -4  -3   8    9.38    0.64 
   5   3  -8    1.10    0.31 
   5  -3   8    1.38    0.31 
  -5  -3  -8    0.86    0.34 
  -5   3   8    0.91    0.32 
  -5  -3  -8    1.36    0.30 
   5   3  -8    1.33    0.34 
  -5   3   8    0.67    0.30 
   5  -3   8    1.07    0.33 
  -5  -3   8    0.89    0.35 
   5   3   8    1.44    0.41 
  -5   3  -8    1.25    0.39 
   5  -3  -8    0.93    0.37 
   6   3  -8   14.47    0.88 
   6   3  -8   14.59    0.86 
   6  -3   8   12.16    0.81 
   6  -3   8   15.00    0.81 
  -6   3   8   13.98    0.89 
  -6   3   8   16.13    0.91 
  -6  -3  -8   14.84    0.96 
  -6  -3   8   12.95    0.89 
   6  -3  -8   15.38    0.95 
  -6   3  -8   14.58    0.96 
   6   3   8   13.26    0.88 
  -7  -3  -8   -0.03    0.33 
   7   3  -8    0.02    0.26 
  -7   3   8   -0.15    0.29 
  -7   3   8    0.48    0.30 
   7  -3   8    0.06    0.26 
   7  -3  -8    0.31    0.34 
  -7  -3   8    0.22    0.29 
  -7   3  -8    0.57    0.37 
   7   3   8   -0.26    0.24 
  -8   3   8    6.98    0.76 
   8   3  -8    5.78    0.76 
  -8  -3  -8    5.90    0.80 
   8  -3   8    5.93    0.72 
  -8   3   8    6.34    0.73 
   8   3   8    4.59    0.68 
   8  -3  -8    5.41    0.78 
  -8  -3   8    5.39    0.79 
  -8   3  -8    5.25    0.76 
  -9  -3  -8   12.59    1.09 
   9   3  -8   11.85    1.02 
  -9   3   8   12.39    1.01 
   9  -3   8   10.60    0.98 
  -9  -3   8   11.79    1.11 
   9   3   8   12.48    1.04 
   9  -3  -8   11.47    1.13 
  -9   3  -8   12.48    1.12 
   0  -4   8    3.15    0.39 
   0  -4  -8    2.34    0.35 
   0   4  -8    2.64    0.36 
   0   4   8    2.88    0.35 
   0   4   8    2.11    0.33 
   0  -4  -8    2.50    0.29 
   0   4  -8    2.51    0.32 
   0  -4   8    2.29    0.22 
  -1  -4  -8    6.92    0.55 
  -1   4   8    7.75    0.42 
   1  -4   8    5.91    0.48 
  -1   4   8    7.05    0.53 
   1   4  -8    6.02    0.49 
  -1  -4  -8    7.28    0.36 
   1   4  -8    7.16    0.41 
   1  -4   8    5.80    0.47 
   1   4   8    7.30    0.52 
   1   4   8    8.02    0.51 
   1  -4  -8    6.47    0.50 
   1  -4  -8    6.80    0.46 
  -1   4  -8    6.27    0.49 
  -1  -4   8    6.63    0.49 
  -1  -4   8    7.70    0.42 
  -2  -4  -8   -0.16    0.22 
  -2   4   8    0.33    0.25 
  -2  -4  -8    0.11    0.11 
   2   4  -8   -0.06    0.20 
   2  -4   8    0.00    0.17 
  -2   4   8    0.25    0.14 
   2  -4   8    0.23    0.19 
  -2  -4   8   -0.20    0.14 
   2  -4  -8    0.24    0.19 
   2  -4  -8   -0.03    0.19 
   2   4   8    0.25    0.24 
  -2   4  -8    0.07    0.24 
   2   4   8    0.19    0.18 
  -2  -4   8    0.41    0.22 
   3  -4   8   52.66    1.56 
  -3  -4  -8   56.97    1.72 
   3   4  -8   55.45    1.65 
  -3   4   8   51.50    1.67 
   3  -4   8   52.50    1.61 
   3   4   8   55.67    1.51 
   3   4   8   53.23    1.68 
   3  -4  -8   54.89    1.62 
  -3   4  -8   54.84    1.70 
  -3  -4   8   55.50    1.61 
  -3  -4   8   56.41    1.66 
   3  -4  -8   54.12    1.62 
   4  -4   8   30.53    1.14 
  -4  -4  -8   32.01    1.32 
  -4   4   8   34.38    1.22 
  -4   4   8   32.50    1.30 
   4   4  -8   32.98    1.24 
   4  -4   8   30.09    1.19 
  -4  -4   8   32.31    1.24 
   4   4   8   32.91    1.30 
   4  -4  -8   33.24    1.27 
   4   4   8   31.88    1.06 
  -4   4  -8   30.79    1.27 
  -4  -4   8   33.41    1.26 
  -5   4   8   76.14    2.14 
   5  -4   8   73.13    2.05 
   5   4  -8   75.78    2.18 
  -5   4   8   70.88    2.21 
   5  -4   8   74.34    2.18 
  -5  -4  -8   75.66    2.28 
  -5  -4   8   74.05    2.21 
  -5   4  -8   73.07    2.26 
   5   4   8   74.02    2.25 
  -5  -4   8   77.25    2.21 
   5  -4  -8   72.38    2.19 
   6  -4   8    5.99    0.64 
   6   4  -8    4.79    0.58 
  -6   4   8    5.15    0.61 
  -6   4   8    4.65    0.64 
  -6  -4  -8    5.90    0.71 
   6   4  -8    4.99    0.64 
   6  -4   8    5.16    0.67 
  -6   4  -8    6.27    0.71 
   6   4   8    4.73    0.64 
  -6  -4   8    5.03    0.66 
   6  -4  -8    5.35    0.63 
  -7  -4  -8   12.30    0.98 
   7  -4   8   12.89    0.94 
  -7   4   8   13.00    0.97 
  -7   4   8   12.99    0.90 
   7   4  -8   10.96    0.89 
   7   4  -8   12.47    0.90 
   7   4   8   11.42    0.94 
  -7  -4   8   11.92    0.95 
  -7   4  -8   12.51    1.00 
   7  -4  -8   11.56    0.96 
   8   4  -8   12.61    0.97 
   8  -4   8   10.98    0.96 
  -8  -4  -8   10.23    0.98 
  -8   4   8   10.69    0.92 
   8   4   8   11.67    1.00 
  -8  -4   8   11.34    1.00 
   8  -4  -8   11.00    1.02 
  -8   4  -8   12.83    1.09 
   9  -4   8    5.19    0.79 
  -9   4   8    4.79    0.78 
   9   4  -8    3.81    0.78 
   9   4   8    4.80    0.92 
  -9   4  -8    4.36    0.89 
   0  -5  -8    0.38    0.20 
   0  -5   8    0.35    0.23 
   0   5  -8    0.24    0.24 
   0   5   8    0.30    0.21 
   0   5   8    0.00    0.20 
   0  -5  -8    0.27    0.26 
   0   5  -8    0.42    0.24 
  -1   5   8   17.61    0.72 
   1  -5   8   18.00    0.86 
  -1  -5  -8   17.92    0.90 
   1   5  -8   18.52    0.89 
  -1   5   8   18.60    0.89 
  -1  -5  -8   18.39    0.69 
   1   5  -8   18.87    0.72 
   1   5   8   17.81    0.83 
  -1   5  -8   18.80    0.86 
  -1   5  -8   18.46    0.85 
  -1  -5   8   16.29    0.84 
   1  -5  -8   17.55    0.76 
   1   5   8   16.36    0.79 
   1  -5  -8   19.04    0.87 
  -1  -5   8   17.73    0.69 
   2   5  -8   19.87    0.94 
   2  -5   8   20.89    0.91 
   2  -5   8   19.54    0.93 
  -2   5   8   20.20    0.98 
  -2  -5  -8   20.60    1.00 
   2  -5  -8   18.56    0.89 
  -2   5  -8   20.64    0.96 
   2   5   8   19.41    0.94 
  -2  -5   8   20.66    0.92 
   2  -5  -8   18.54    0.86 
  -2   5  -8   18.60    0.87 
  -2  -5   8   18.98    0.81 
   2   5   8   19.62    0.82 
   3  -5   8   21.28    0.93 
  -3   5   8   20.68    1.03 
  -3  -5  -8   19.81    1.02 
   3  -5   8   20.36    0.98 
   3   5  -8   19.15    0.98 
   3  -5  -8   21.10    0.96 
   3   5   8   22.84    1.06 
   3   5   8   19.49    0.83 
  -3   5  -8   21.50    1.03 
  -3  -5   8   21.33    0.94 
  -3  -5   8   21.00    0.98 
   3  -5  -8   19.51    0.94 
  -4  -5  -8    9.24    0.78 
   4   5  -8   10.42    0.76 
   4  -5   8   10.28    0.74 
   4  -5   8   10.95    0.68 
  -4   5   8   10.16    0.80 
   4  -5  -8    9.38    0.73 
  -4  -5   8    8.40    0.69 
   4   5   8    9.09    0.77 
   4  -5  -8   10.56    0.71 
  -4   5  -8    9.53    0.76 
  -4  -5   8   11.11    0.73 
  -5   5   8   15.29    0.99 
   5  -5   8   17.43    0.86 
   5   5  -8   14.73    0.94 
   5  -5   8   14.67    0.92 
  -5  -5  -8   16.28    1.02 
   5   5   8   14.87    0.98 
  -5  -5   8   15.47    0.93 
  -5  -5   8   15.23    0.91 
   5  -5  -8   16.43    0.99 
  -5   5  -8   16.12    1.03 
   5  -5  -8   16.67    0.90 
  -6   5   8    6.51    0.74 
   6  -5   8    6.57    0.70 
  -6   5   8    6.87    0.67 
   6   5  -8    5.43    0.69 
  -6  -5  -8    8.51    0.83 
  -6  -5   8    7.01    0.70 
  -6   5  -8    6.51    0.80 
   6   5   8    6.40    0.75 
  -6  -5   8    5.46    0.67 
   6  -5  -8    5.19    0.69 
   7  -5   8    0.09    0.36 
   7   5  -8    0.40    0.37 
  -7  -5  -8   -0.54    0.29 
  -7   5   8    0.02    0.31 
   7   5  -8    0.12    0.30 
   7  -5  -8   -0.55    0.30 
  -7   5  -8    0.04    0.34 
  -7  -5   8    0.19    0.33 
   7   5   8    0.14    0.37 
  -8   5   8    4.93    0.77 
   8  -5   8    5.91    0.82 
   8   5  -8    4.16    0.69 
  -8  -5  -8    4.88    0.82 
  -8   5  -8    4.91    0.84 
   8   5   8    3.96    0.69 
  -8  -5   8    5.42    0.85 
   8  -5  -8    5.76    0.87 
   0  -6  -8    1.90    0.33 
   0   6  -8    1.69    0.36 
   0  -6   8    2.03    0.40 
   0   6  -8    1.72    0.38 
   0   6   8    1.51    0.35 
   0  -6  -8    2.35    0.45 
   0   6   8    2.07    0.39 
  -1   6   8    1.78    0.34 
   1   6  -8    1.98    0.41 
  -1   6   8    2.23    0.41 
   1  -6   8    1.10    0.34 
  -1  -6  -8    2.72    0.48 
  -1   6  -8    1.48    0.37 
  -1  -6   8    1.53    0.38 
   1   6   8    1.43    0.37 
   1  -6  -8    1.79    0.35 
   1   6   8    1.49    0.34 
  -1   6  -8    1.62    0.35 
   1  -6  -8    1.71    0.37 
   2   6  -8   19.58    1.01 
  -2   6   8   20.32    1.06 
  -2  -6  -8   21.16    1.07 
   2  -6   8   21.56    1.04 
  -2  -6   8   20.86    1.02 
   2  -6  -8   21.67    0.98 
  -2   6  -8   19.80    1.01 
   2   6   8   19.97    1.02 
  -2   6  -8   21.70    0.99 
  -2  -6   8   20.71    0.88 
   2   6   8   21.79    0.92 
   2  -6  -8   20.16    0.98 
  -3  -6  -8   15.17    0.95 
   3   6  -8   14.96    0.92 
   3  -6   8   14.20    0.88 
  -3   6   8   13.48    0.92 
  -3   6  -8   13.55    0.89 
   3  -6  -8   12.75    0.80 
   3  -6  -8   13.90    0.82 
  -3   6  -8   15.04    0.83 
  -3  -6   8   13.00    0.83 
  -3  -6   8   13.34    0.77 
   3   6   8   12.72    0.88 
   4  -6   8   11.24    0.83 
  -4   6   8   12.47    0.91 
   4  -6   8   11.46    0.73 
   4   6  -8   11.04    0.85 
  -4  -6  -8   11.11    0.88 
  -4  -6   8   11.48    0.79 
   4  -6  -8   11.04    0.76 
  -4   6  -8   12.94    0.93 
  -4  -6   8    9.81    0.76 
   4   6   8   10.86    0.85 
   4  -6  -8   10.75    0.80 
  -5  -6  -8    4.88    0.72 
   5  -6   8    3.54    0.57 
  -5   6   8    4.47    0.68 
   5   6  -8    6.11    0.76 
   5  -6  -8    4.75    0.65 
  -5  -6   8    2.80    0.50 
  -5  -6   8    4.55    0.61 
  -5   6  -8    4.64    0.70 
   5   6   8    4.08    0.66 
   5  -6  -8    4.15    0.55 
   6  -6   8    8.73    0.84 
  -6  -6  -8    9.01    0.90 
  -6   6   8    9.37    0.92 
   6   6  -8    7.66    0.84 
  -6  -6   8    8.07    0.78 
  -6   6  -8    6.07    0.82 
  -6  -6   8    8.89    0.83 
   6   6   8    8.35    0.88 
   6  -6  -8    8.24    0.81 
   7  -6   8    8.91    0.92 
  -7  -6  -8    9.74    0.99 
   7   6  -8    7.87    0.81 
  -7   6   8    9.10    0.96 
   7   6  -8    8.88    0.92 
   7   6   8    7.95    0.92 
   7  -6  -8   10.08    0.94 
  -7   6  -8    8.73    1.00 
  -7  -6   8    8.06    0.90 
   8   6  -8    0.04    0.42 
   8   6  -8    0.58    0.47 
   0  -7   8   12.73    0.86 
   0   7   8   13.61    0.80 
   0   7   8   15.11    0.86 
   0  -7  -8   12.72    0.87 
   0   7  -8   12.70    0.84 
  -1   7   8   25.50    1.19 
  -1  -7  -8   24.95    1.21 
   1  -7   8   24.36    1.19 
   1   7  -8   26.56    1.22 
  -1   7  -8   23.68    1.15 
   1  -7  -8   23.63    1.12 
  -1   7  -8   25.91    1.14 
   1   7   8   25.35    1.10 
   1  -7  -8   26.42    1.08 
  -1  -7   8   23.98    1.19 
   1   7   8   26.39    1.18 
  -2  -7  -8    8.11    0.76 
  -2   7   8    9.37    0.76 
   2  -7   8    7.62    0.72 
   2   7  -8    7.01    0.71 
  -2   7  -8    9.02    0.70 
  -2   7  -8    7.38    0.71 
   2   7   8    8.47    0.76 
  -2  -7   8    8.46    0.73 
   2  -7  -8    8.45    0.69 
   2  -7  -8    7.74    0.68 
  -3  -7  -8   34.77    1.50 
   3  -7   8   32.41    1.44 
  -3   7   8   32.22    1.49 
   3   7  -8   35.71    1.52 
  -3   7  -8   33.37    1.47 
  -3  -7   8   33.90    1.42 
  -3   7  -8   31.90    1.32 
   3  -7  -8   33.64    1.36 
   3  -7  -8   35.77    1.41 
   3   7   8   32.63    1.47 
   4  -7   8    0.70    0.36 
  -4   7   8    0.64    0.36 
  -4  -7  -8    0.35    0.34 
   4   7  -8    0.26    0.35 
  -4  -7   8    1.17    0.38 
   4  -7  -8    0.55    0.34 
  -4   7  -8    0.90    0.43 
  -4   7  -8    0.86    0.31 
  -4  -7   8    0.19    0.29 
   4   7   8    1.12    0.42 
   5  -7   8    2.07    0.53 
  -5  -7  -8    1.57    0.52 
   5   7  -8    1.14    0.47 
  -5   7   8    2.19    0.59 
  -5  -7   8    1.54    0.46 
  -5   7  -8    1.08    0.51 
   5   7   8    1.43    0.47 
  -5  -7   8    2.21    0.49 
   5  -7  -8    1.37    0.47 
  -6   7   8    1.21    0.50 
  -6  -7  -8    1.80    0.57 
   6   7  -8    0.87    0.49 
   6  -7   8    1.24    0.46 
   6   7   8    1.33    0.53 
  -6   7  -8    1.22    0.50 
   6  -7  -8    2.70    0.63 
  -6  -7   8    0.54    0.40 
  -6  -7   8    1.72    0.51 
   7   7  -8    1.65    0.51 
   7   7  -8    0.77    0.59 
  -7  -7   8    1.36    0.52 
   0  -8  -8    1.35    0.42 
   0   8   8    2.28    0.48 
   0   8  -8    1.54    0.44 
   0  -8   8    2.53    0.54 
   1   8  -8    7.92    0.77 
  -1  -8  -8    6.41    0.73 
  -1   8   8    6.46    0.71 
   1  -8   8    8.42    0.80 
  -1   8  -8    7.64    0.73 
   1   8   8    7.00    0.70 
   1  -8  -8    7.23    0.71 
  -1  -8   8    7.46    0.77 
   2  -8   8    0.27    0.33 
  -2   8   8    0.29    0.35 
  -2  -8  -8    0.00    0.32 
   2   8  -8   -0.26    0.28 
   2  -8  -8    0.05    0.27 
  -2   8  -8   -0.09    0.32 
  -2  -8   8    0.01    0.30 
   2   8   8    0.73    0.39 
  -2   8  -8    0.26    0.28 
   3  -8   8   12.32    0.96 
  -3   8   8   12.35    1.01 
   3   8  -8   13.49    1.03 
  -3  -8  -8   14.38    1.05 
  -3   8  -8   12.10    0.97 
   3   8   8    9.66    0.91 
  -3   8  -8   12.28    0.88 
   3  -8  -8   12.46    0.90 
  -3  -8   8   11.52    0.90 
   4  -8   8    4.23    0.67 
  -4  -8  -8    4.57    0.72 
   4   8  -8    4.19    0.69 
  -4   8   8    6.05    0.82 
  -4   8  -8    3.67    0.70 
   4  -8  -8    4.97    0.71 
  -4  -8   8    5.74    0.76 
   4   8   8    5.37    0.80 
   5  -8   8    5.59    0.80 
  -5  -8  -8    4.37    0.74 
   5   8  -8    4.74    0.79 
  -5   8   8    4.45    0.76 
  -5  -8   8    4.40    0.69 
  -5   8  -8    5.08    0.82 
   5   8   8    4.46    0.76 
   5  -8  -8    4.03    0.70 
  -6  -8   8    2.53    0.63 
  -6  -8   8    2.67    0.65 
   0  -9  -8    3.56    0.80 
   0   9  -8    2.71    0.60 
   0  -9   8    1.77    0.54 
   1   9  -8    7.18    0.80 
   1  -9   8    5.63    0.75 
  -1   9   8    5.10    0.73 
  -1  -9  -8    7.73    0.84 
  -1  -9   8    7.94    0.85 
  -1   9  -8    7.20    0.80 
  -2  -9  -8    1.27    0.47 
   2   9  -8    2.39    0.57 
   2  -9   8    1.48    0.51 
  -2   9   8    1.59    0.52 
   2   9   8    1.74    0.54 
  -2   9  -8    1.61    0.48 
  -2  -9   8    1.71    0.50 
  -3  -9  -8   14.54    1.13 
   3   9  -8   12.32    1.10 
   3  -9   8   15.18    1.13 
  -3   9   8   16.68    1.19 
  -3  -9   8   14.59    1.09 
   3   9   8   12.52    1.11 
  -3   9  -8   15.93    1.14 
   3  -9  -8   12.85    1.01 
  -4  -9  -8    0.56    0.48 
  -4   9   8    1.77    0.57 
   4  -9  -8    1.06    0.45 
  -4  -9   8    0.53    0.41 
  -4   9  -8    0.45    0.49 
   4   9   8    0.85    0.50 
   0  10  -8    2.17    0.59 
  -1  10  -8    5.05    0.78 
  -2  10   8    1.26    0.54 
   2  10   8    0.95    0.57 
   0   0   9   -0.12    0.12 
   0   0   9   -0.05    0.11 
   0   0  -9   -0.12    0.11 
   0   0   9   -0.27    0.08 
  -1   0   9  113.19    2.42 
   1   0   9  112.26    2.20 
  -1   0   9  111.13    2.31 
  -1   0  -9  111.42    2.35 
   1   0   9  109.94    2.41 
  -1   0   9  107.69    2.33 
  -1   0   9  105.01    2.40 
   1   0   9  114.90    2.48 
   2   0  -9  500.69    9.36 
  -2   0  -9  497.24    9.46 
  -2   0   9  486.69    9.58 
  -2   0   9  505.01    9.51 
   2   0  -9  496.05    9.52 
  -2   0  -9  480.17    9.58 
   2   0   9  503.70    9.29 
   2   0   9  494.56    9.58 
  -3   0  -9   18.54    0.68 
   3   0   9   17.40    0.56 
   3   0  -9   17.18    0.55 
  -3   0   9   18.59    0.77 
   3   0   9   17.79    0.74 
  -3   0   9   17.14    0.66 
  -3   0  -9   18.14    0.75 
  -4   0   9   57.02    1.50 
   4   0   9   56.72    1.64 
   4   0  -9   55.29    1.62 
  -4   0  -9   53.70    1.60 
  -4   0  -9   59.81    1.56 
   4   0   9   59.27    1.43 
   4   0  -9   58.28    1.36 
  -4   0   9   58.63    1.69 
   5   0   9    0.38    0.20 
   5   0  -9    0.29    0.23 
  -5   0  -9    0.10    0.23 
  -5   0   9    0.35    0.27 
  -5   0   9    0.37    0.21 
   5   0   9    0.20    0.24 
  -5   0  -9    0.28    0.24 
  -6   0  -9  123.95    3.09 
  -6   0   9  122.71    3.20 
   6   0   9  122.97    3.10 
   6   0  -9  123.94    3.17 
  -6   0  -9  122.65    3.01 
   6   0   9  122.50    2.88 
   7   0  -9    0.78    0.37 
  -7   0   9    0.62    0.33 
   7   0   9    0.34    0.28 
  -7   0  -9    0.08    0.27 
  -7   0  -9    0.53    0.29 
   8   0   9   30.92    1.37 
   8   0  -9   27.66    1.41 
  -8   0   9   28.69    1.44 
  -8   0  -9   28.62    1.52 
  -9   0   9    0.12    0.41 
   9   0  -9    0.63    0.44 
   0  -1   9    4.21    0.28 
   0  -1   9    4.50    0.32 
   0  -1  -9    4.21    0.34 
   0  -1   9    4.67    0.32 
   0  -1   9    4.24    0.27 
   0   1   9    4.46    0.29 
   0  -1  -9    4.22    0.22 
  -1   1   9   35.59    1.06 
   1  -1   9   36.32    1.05 
  -1   1   9   40.44    0.92 
   1  -1   9   37.97    0.96 
  -1   1   9   37.32    1.07 
  -1  -1  -9   37.38    1.06 
  -1  -1   9   38.28    1.00 
  -1   1  -9   38.18    0.91 
  -1   1  -9   38.81    1.08 
   1  -1  -9   38.40    0.97 
   1   1   9   36.44    1.07 
  -1  -1   9   37.14    1.01 
  -1  -1   9   37.17    1.02 
  -1  -1   9   37.70    1.01 
   1   1   9   36.90    1.05 
   2  -1   9   89.35    2.14 
   2   1  -9   93.37    2.04 
  -2   1   9   95.31    1.86 
   2  -1   9   93.17    2.00 
  -2  -1  -9   92.33    2.13 
  -2   1   9   89.61    2.17 
  -2   1   9   90.41    2.14 
  -2  -1   9   94.64    2.19 
  -2   1  -9   93.84    2.24 
   2   1   9   94.88    2.22 
  -2   1  -9   97.26    2.01 
  -2  -1   9   92.51    2.19 
  -2  -1   9   97.94    2.07 
   2   1   9   95.04    2.22 
   2  -1  -9   94.42    2.15 
  -3   1   9   10.59    0.54 
   3   1  -9    9.63    0.46 
  -3  -1  -9    9.68    0.55 
  -3   1   9    8.94    0.55 
   3   1  -9    9.27    0.53 
   3  -1   9    9.65    0.46 
   3  -1   9    9.53    0.54 
  -3  -1  -9    9.56    0.53 
  -3   1  -9   10.40    0.46 
  -3   1  -9    8.02    0.52 
   3   1   9   10.13    0.35 
   3  -1  -9   10.12    0.31 
  -3  -1   9   10.23    0.57 
   3  -1  -9    9.85    0.55 
  -3  -1   9    9.89    0.44 
   4   1  -9   97.91    2.19 
   4   1  -9   94.72    2.40 
  -4   1   9   91.62    2.41 
  -4   1   9   94.87    2.33 
  -4  -1  -9   96.35    2.35 
  -4  -1  -9   96.00    2.37 
   4  -1   9   99.00    2.23 
   4  -1   9   95.00    2.36 
   4  -1  -9   96.28    2.43 
  -4  -1   9  101.20    2.18 
   4   1   9   99.42    2.11 
  -4   1  -9   93.58    2.42 
  -4   1  -9  100.25    2.22 
  -4  -1   9   94.54    2.44 
   4   1   9   97.83    2.43 
  -5  -1  -9   14.68    0.78 
   5   1  -9   12.55    0.76 
   5   1  -9   14.25    0.66 
   5  -1   9   13.99    0.75 
  -5  -1  -9   13.92    0.73 
   5  -1   9   13.82    0.68 
  -5   1   9   14.64    0.82 
  -5   1   9   13.19    0.70 
   5   1   9   14.07    0.79 
   5  -1  -9   12.51    0.78 
   5   1   9   14.35    0.63 
  -5  -1   9   14.11    0.80 
  -5   1  -9   15.21    0.69 
  -5   1  -9   14.71    0.82 
  -6  -1  -9    3.13    0.49 
  -6   1   9    3.16    0.50 
  -6   1   9    2.56    0.41 
   6  -1   9    2.83    0.42 
   6  -1   9    3.63    0.48 
  -6  -1  -9    2.94    0.45 
   6   1  -9    3.28    0.51 
   6   1   9    3.17    0.50 
  -6   1  -9    3.51    0.52 
  -6  -1   9    2.51    0.49 
   6  -1  -9    3.40    0.51 
  -7   1   9   32.92    1.45 
   7  -1   9   31.51    1.27 
  -7  -1  -9   34.73    1.40 
   7  -1   9   34.90    1.36 
   7   1  -9   32.61    1.44 
  -7  -1  -9   37.05    1.38 
   7   1   9   36.07    1.44 
  -7   1  -9   34.42    1.45 
  -7  -1   9   33.86    1.47 
   7  -1  -9   32.18    1.44 
   8  -1   9    2.38    0.47 
  -8   1   9    2.34    0.54 
  -8  -1  -9    1.87    0.49 
   8   1  -9    1.97    0.51 
  -8   1  -9    2.04    0.49 
   8   1   9    2.51    0.54 
  -8  -1   9    1.91    0.50 
   8  -1  -9    2.49    0.54 
   9   1  -9    7.52    0.88 
  -9   1   9    7.98    0.89 
   9  -1  -9    7.55    0.93 
  -9  -1   9    6.53    0.92 
   9   1   9    7.95    0.84 
   0   2  -9    8.70    0.43 
   0   2   9    9.12    0.42 
   0  -2  -9    8.67    0.49 
   0  -2   9    9.34    0.36 
   0  -2   9    8.85    0.45 
   0   2   9    8.91    0.48 
   0  -2  -9    8.44    0.33 
   0  -2   9    8.88    0.47 
  -1   2   9  104.11    2.11 
  -1   2   9   97.14    2.34 
  -1  -2  -9  100.98    2.35 
   1   2  -9  102.86    2.18 
   1  -2   9  101.80    2.26 
   1   2  -9  103.98    2.31 
   1  -2   9   98.53    2.32 
   1   2   9  104.02    2.34 
  -1   2  -9  100.11    2.35 
   1  -2  -9  106.32    2.24 
  -1  -2   9  101.98    2.34 
   1   2   9  102.11    2.38 
  -1  -2   9  106.66    2.27 
   1  -2  -9  103.77    2.40 
  -1   2  -9  105.63    2.06 
  -1  -2   9  107.02    2.36 
   2  -2   9    1.42    0.24 
  -2   2   9    2.04    0.14 
  -2   2   9    1.29    0.26 
  -2   2   9    2.94    0.35 
   2   2  -9    1.58    0.25 
  -2  -2  -9    1.45    0.28 
   2  -2   9    1.41    0.25 
   2   2   9    2.05    0.31 
  -2  -2   9    1.67    0.27 
   2   2   9    1.90    0.28 
   2  -2  -9    1.98    0.28 
  -2  -2   9    1.65    0.19 
  -2  -2   9    1.37    0.25 
  -2   2  -9    1.44    0.15 
  -2   2  -9    1.42    0.26 
  -3   2   9   27.24    1.01 
  -3  -2  -9   27.07    1.01 
  -3   2   9   28.18    1.01 
   3  -2   9   28.19    0.92 
   3   2  -9   26.78    0.91 
   3  -2   9   27.14    0.97 
   3   2   9   29.56    0.69 
   3  -2  -9   29.03    1.00 
   3   2   9   28.88    1.05 
  -3  -2   9   27.89    1.01 
   3   2   9   30.00    1.00 
  -3   2  -9   31.07    1.09 
  -3  -2   9   30.63    0.78 
  -3  -2   9   28.64    1.02 
  -3   2  -9   30.30    0.76 
   4  -2   9   14.81    0.72 
  -4   2   9   16.00    0.79 
  -4  -2  -9   15.26    0.71 
  -4   2   9   13.70    0.74 
   4   2  -9   15.03    0.75 
   4  -2   9   15.71    0.71 
  -4  -2  -9   15.56    0.81 
   4   2  -9   14.77    0.70 
  -4   2  -9   16.26    0.84 
   4   2   9   14.89    0.80 
   4  -2  -9   16.66    0.81 
  -4  -2   9   15.97    0.80 
  -5   2   9   11.20    0.75 
  -5   2   9   12.69    0.75 
  -5  -2  -9   13.83    0.71 
   5   2  -9   12.89    0.70 
   5  -2   9   12.97    0.71 
   5   2  -9   13.41    0.78 
  -5  -2  -9   12.53    0.79 
   5  -2   9   13.02    0.72 
  -5   2  -9   12.44    0.81 
  -5  -2   9   13.49    0.80 
   5  -2  -9   12.62    0.79 
   5   2   9   12.19    0.75 
   6   2  -9   15.27    0.90 
  -6   2   9   14.71    0.90 
  -6  -2  -9   14.75    0.79 
   6  -2   9   15.55    0.83 
  -6  -2  -9   14.92    0.90 
   6  -2   9   15.66    0.84 
  -6   2   9   14.46    0.83 
  -6  -2   9   14.91    0.92 
   6   2   9   14.15    0.89 
   6  -2  -9   13.74    0.90 
  -6   2  -9   14.61    0.92 
  -7   2   9    8.04    0.68 
  -7   2   9    6.79    0.71 
   7  -2   9    8.50    0.68 
   7  -2   9    7.15    0.63 
   7   2  -9    7.83    0.74 
  -7  -2  -9    7.58    0.78 
   7   2   9    8.17    0.77 
  -7  -2   9    9.00    0.79 
   7  -2  -9    5.93    0.72 
  -7   2  -9    7.84    0.76 
   8  -2   9    3.18    0.75 
  -8   2   9    2.61    0.56 
   8   2  -9    3.18    0.64 
  -8  -2  -9    2.34    0.56 
  -8   2  -9    3.53    0.62 
   8  -2  -9    3.05    0.62 
  -8  -2   9    2.81    0.59 
   8   2   9    3.65    0.64 
  -9   2   9    2.74    0.62 
   9   2  -9    3.17    0.64 
  -9  -2  -9    1.72    0.56 
  -9   2  -9    3.23    0.67 
   9   2   9    3.27    0.64 
   9  -2  -9    3.06    0.69 
  -9  -2   9    2.87    0.65 
   0  -3   9   59.32    1.60 
   0   3  -9   60.85    1.53 
   0   3   9   61.17    1.50 
   0  -3  -9   61.55    1.38 
   0  -3   9   62.57    1.36 
   0   3   9   59.26    1.62 
   0  -3   9   62.77    1.61 
   0  -3  -9   60.98    1.64 
  -1   3   9   32.35    0.86 
  -1   3   9   31.30    1.06 
   1   3  -9   33.31    0.90 
  -1  -3  -9   28.64    1.04 
   1  -3   9   31.32    1.02 
   1  -3   9   30.60    1.02 
   1   3  -9   32.47    1.05 
  -1  -3  -9   31.99    0.74 
   1   3   9   32.04    1.04 
   1  -3  -9   32.37    0.93 
   1  -3  -9   31.20    1.06 
  -1   3  -9   32.47    1.04 
   1   3   9   30.40    0.99 
  -1  -3   9   31.04    1.03 
  -1  -3   9   33.02    0.92 
  -2  -3  -9   86.35    2.23 
  -2   3   9   91.79    1.80 
   2   3  -9   89.25    1.88 
   2   3  -9   88.81    2.18 
   2  -3   9   87.71    2.14 
  -2  -3  -9   88.22    1.79 
   2  -3   9   86.16    2.17 
  -2  -3   9   87.12    2.07 
  -2   3  -9   86.86    2.17 
  -2  -3   9   83.47    2.14 
   2   3   9   87.17    2.11 
   2  -3  -9   85.87    2.17 
   2  -3  -9   87.25    2.08 
   2   3   9   87.16    2.16 
  -3  -3  -9    6.17    0.56 
  -3   3   9    5.54    0.50 
   3  -3   9    6.60    0.49 
   3  -3   9    6.03    0.48 
   3   3  -9    7.44    0.52 
  -3   3   9    7.24    0.54 
   3   3   9    6.81    0.56 
  -3  -3   9    7.51    0.53 
   3   3   9    6.88    0.47 
  -3  -3   9    6.86    0.53 
  -3   3  -9    6.07    0.56 
   3  -3  -9    5.41    0.49 
  -4  -3  -9   10.68    0.59 
   4  -3   9   10.53    0.63 
  -4   3   9   10.32    0.70 
  -4   3   9    9.61    0.65 
  -4  -3  -9    8.32    0.70 
   4  -3   9   10.37    0.63 
   4   3  -9   10.48    0.64 
  -4  -3   9   10.03    0.65 
  -4   3  -9   10.69    0.74 
   4  -3  -9   10.00    0.69 
   4   3   9   10.68    0.72 
  -4  -3   9   10.24    0.67 
   5   3  -9   25.28    1.05 
   5   3  -9   25.66    1.12 
   5  -3   9   22.98    0.99 
   5  -3   9   23.55    1.03 
  -5  -3  -9   26.05    1.16 
  -5   3   9   22.85    1.06 
  -5   3   9   23.44    1.09 
  -5  -3  -9   25.82    0.97 
   5  -3  -9   21.59    1.07 
  -5  -3   9   23.29    1.08 
   5   3   9   20.64    1.06 
  -5   3  -9   23.36    1.12 
  -6   3   9   14.08    0.87 
  -6  -3  -9   12.10    0.88 
   6   3  -9   14.15    0.89 
   6  -3   9   12.03    0.80 
   6  -3   9   11.74    0.74 
  -6   3   9   12.78    0.86 
   6   3  -9   15.73    0.86 
   6  -3  -9   12.73    0.91 
  -6   3  -9   13.21    0.93 
  -6  -3   9   13.33    0.89 
   6   3   9   13.20    0.90 
  -7   3   9   12.97    0.92 
  -7   3   9   14.87    0.95 
   7   3  -9   14.54    0.96 
   7  -3   9   13.54    0.92 
  -7  -3  -9   13.41    0.97 
  -7  -3   9   13.73    0.98 
   7  -3  -9   14.95    1.02 
  -7   3  -9   13.02    0.99 
   7   3   9   13.78    0.98 
  -8   3   9    3.22    0.61 
  -8   3   9    3.04    0.59 
   8  -3   9    2.82    0.58 
   8   3  -9    3.86    0.64 
  -8  -3  -9    3.32    0.65 
  -8   3  -9    1.43    0.49 
  -8  -3   9    2.50    0.55 
   8   3   9    2.83    0.60 
   8  -3  -9    3.05    0.64 
  -9  -3  -9    6.18    0.90 
   9   3  -9    6.28    0.87 
  -9   3   9    5.94    0.84 
  -9   3  -9    5.67    0.87 
   9   3   9    6.55    0.88 
   0   4   9   16.84    0.77 
   0   4  -9   15.88    0.69 
   0   4  -9   17.13    0.77 
   0  -4  -9   15.77    0.77 
   0  -4   9   16.84    0.53 
   0  -4   9   16.45    0.76 
   0   4   9   15.53    0.68 
   0  -4  -9   17.10    0.62 
  -1   4   9   33.07    0.96 
   1   4  -9   32.97    1.15 
  -1  -4  -9   34.77    0.89 
   1  -4   9   31.89    1.13 
   1   4  -9   34.43    0.98 
  -1  -4  -9   32.07    1.18 
   1  -4   9   34.21    1.15 
  -1   4   9   31.75    1.15 
  -1  -4   9   34.79    0.99 
   1   4   9   33.35    1.11 
  -1  -4   9   32.85    1.15 
  -1   4  -9   34.08    1.13 
   1  -4  -9   33.28    1.17 
   1  -4  -9   35.04    1.04 
   1   4   9   32.60    1.11 
  -2   4   9    8.67    0.63 
   2  -4   9    8.78    0.58 
   2   4  -9    9.66    0.62 
  -2  -4  -9    9.44    0.67 
   2  -4   9    8.26    0.56 
  -2   4  -9   10.00    0.64 
   2  -4  -9    9.54    0.58 
  -2  -4   9    9.61    0.54 
   2   4   9    8.35    0.60 
   2  -4  -9    9.00    0.61 
  -2  -4   9    8.43    0.59 
   2   4   9   10.00    0.58 
   3  -4   9   20.61    0.92 
   3  -4   9   21.77    0.91 
   3   4  -9   20.31    0.93 
  -3   4   9   21.21    1.00 
  -3  -4  -9   21.08    1.01 
  -3  -4   9   19.74    0.87 
  -3  -4   9   20.05    0.92 
   3  -4  -9   21.36    0.91 
  -3   4  -9   19.64    0.95 
   3  -4  -9   18.96    0.89 
   3   4   9   20.39    0.96 
   3   4   9   20.15    0.83 
  -4   4   9   17.00    0.96 
  -4   4   9   17.32    0.88 
  -4  -4  -9   17.11    0.98 
   4  -4   9   18.74    0.92 
   4   4  -9   17.05    0.89 
   4  -4   9   17.12    0.83 
  -4   4  -9   17.46    0.98 
  -4  -4   9   16.11    0.88 
  -4  -4   9   17.84    0.90 
   4  -4  -9   15.92    0.88 
   4   4   9   18.29    0.97 
   4   4   9   18.87    0.79 
  -5   4   9   53.46    1.75 
   5   4  -9   53.15    1.74 
   5  -4   9   55.53    1.69 
  -5  -4  -9   54.07    1.88 
  -5   4   9   53.42    1.84 
   5  -4   9   54.18    1.76 
  -5  -4   9   52.01    1.77 
  -5  -4   9   54.31    1.81 
   5   4   9   53.16    1.83 
  -5   4  -9   53.69    1.87 
   5  -4  -9   55.31    1.82 
   6   4  -9    6.01    0.65 
   6   4  -9    7.00    0.67 
  -6   4   9    5.63    0.62 
   6  -4   9    5.59    0.63 
  -6  -4  -9    7.09    0.76 
   6  -4   9    7.52    0.63 
  -6   4   9    6.27    0.68 
   6  -4  -9    6.78    0.73 
   6   4   9    6.63    0.69 
  -6  -4   9    6.21    0.69 
  -6   4  -9    6.45    0.71 
  -7   4   9    5.40    0.66 
   7   4  -9    5.87    0.72 
   7   4  -9    5.65    0.72 
   7  -4   9    5.92    0.71 
  -7   4   9    4.93    0.69 
  -7  -4  -9    4.94    0.74 
   7  -4  -9    6.83    0.79 
  -7  -4   9    6.54    0.74 
  -7   4  -9    4.72    0.70 
   7   4   9    5.42    0.75 
   8  -4   9   13.42    1.02 
  -8  -4  -9   13.77    1.11 
   8   4  -9   14.84    1.06 
  -8   4   9   13.49    1.03 
  -8   4   9   14.60    1.07 
   8  -4  -9   13.77    1.14 
  -8  -4   9   13.41    1.08 
  -8   4  -9   15.03    1.18 
   8   4   9   15.30    1.11 
   9  -4   9    8.51    0.99 
   0   5  -9    7.56    0.59 
   0  -5  -9    7.82    0.47 
   0   5   9    7.24    0.53 
   0   5   9    7.28    0.58 
   0  -5  -9    6.96    0.60 
   0   5  -9    7.67    0.55 
   0  -5   9    7.05    0.58 
  -1  -5  -9    8.86    0.68 
   1   5  -9    7.52    0.59 
  -1   5   9    9.31    0.52 
  -1   5   9    8.63    0.64 
   1   5  -9    9.09    0.68 
   1  -5   9    8.94    0.64 
   1   5   9    8.37    0.58 
   1  -5  -9    8.63    0.63 
   1  -5  -9    8.78    0.56 
   1   5   9    8.34    0.60 
  -1  -5   9    8.92    0.49 
  -1  -5   9    8.89    0.63 
  -1   5  -9    8.17    0.59 
  -1   5  -9    9.35    0.63 
  -2   5   9    4.03    0.49 
   2  -5   9    4.03    0.47 
   2   5  -9    4.31    0.54 
   2  -5   9    4.23    0.50 
  -2  -5  -9    4.79    0.59 
   2  -5  -9    3.53    0.47 
  -2  -5   9    5.78    0.46 
   2  -5  -9    4.12    0.48 
   2   5   9    4.66    0.46 
  -2   5  -9    5.64    0.58 
   2   5   9    4.52    0.55 
  -2  -5   9    4.36    0.50 
  -3   5   9   27.66    1.23 
   3  -5   9   25.48    1.07 
  -3  -5  -9   29.54    1.25 
   3  -5   9   25.95    1.13 
   3   5  -9   29.35    1.21 
   3   5   9   26.74    1.17 
   3  -5  -9   25.15    1.07 
   3  -5  -9   25.87    1.10 
  -3  -5   9   27.29    1.07 
  -3  -5   9   25.29    1.11 
  -3   5  -9   28.21    1.21 
   3   5   9   25.97    0.99 
   4  -5   9   25.61    1.16 
   4  -5   9   26.85    1.09 
   4   5  -9   26.33    1.19 
  -4   5   9   25.47    1.22 
  -4  -5  -9   25.19    1.23 
  -4  -5   9   26.95    1.19 
   4   5   9   26.77    1.23 
  -4   5  -9   26.69    1.23 
   4  -5  -9   27.84    1.15 
   4  -5  -9   28.93    1.21 
  -4  -5   9   25.01    1.12 
   5  -5   9    8.33    0.74 
  -5  -5  -9    9.17    0.84 
  -5   5   9    9.27    0.81 
   5   5  -9    9.29    0.76 
   5  -5   9    9.10    0.65 
  -5   5  -9    9.52    0.84 
   5   5   9    8.61    0.80 
  -5  -5   9    7.70    0.69 
   5  -5  -9    8.46    0.70 
   5  -5  -9    8.68    0.78 
  -5  -5   9    7.75    0.69 
  -6   5   9    2.20    0.53 
  -6  -5  -9    2.07    0.53 
  -6   5   9    2.32    0.49 
   6   5  -9    1.85    0.48 
   6  -5   9    1.94    0.47 
  -6   5  -9    1.96    0.54 
   6   5   9    2.28    0.54 
   6  -5  -9    3.02    0.59 
  -6  -5   9    2.31    0.49 
  -6  -5   9    2.53    0.51 
   7  -5   9    2.14    0.51 
  -7  -5  -9    3.25    0.64 
  -7   5   9    2.72    0.61 
   7   5  -9    3.18    0.62 
   7   5  -9    4.07    0.64 
  -7   5  -9    3.42    0.70 
  -7  -5   9    2.71    0.60 
   7  -5  -9    3.28    0.62 
   7   5   9    2.60    0.59 
   8  -5   9    0.27    0.40 
  -8   5   9    0.76    0.45 
   8   5  -9    1.02    0.43 
  -8  -5  -9    0.83    0.53 
   8  -5  -9   -0.05    0.43 
   8   5   9    0.36    0.43 
  -8   5  -9    0.99    0.52 
  -8  -5   9    0.08    0.40 
   0   6   9   11.65    0.74 
   0   6   9   12.01    0.71 
   0   6  -9   11.24    0.69 
   0  -6  -9   10.47    0.76 
   0   6  -9   11.38    0.76 
   0  -6   9   10.17    0.74 
  -1   6   9   39.49    1.44 
   1   6  -9   36.44    1.41 
   1  -6   9   37.38    1.41 
  -1  -6  -9   36.77    1.43 
   1   6   9   36.67    1.36 
  -1   6  -9   37.10    1.39 
   1   6   9   36.58    1.32 
   1  -6  -9   35.65    1.38 
   1  -6  -9   40.62    1.29 
  -1   6  -9   36.98    1.34 
  -1  -6   9   37.62    1.42 
  -2   6   9   12.81    0.86 
   2   6  -9   11.91    0.82 
   2  -6   9   13.07    0.82 
  -2  -6  -9   11.63    0.85 
   2  -6  -9   11.67    0.78 
  -2   6  -9   11.71    0.80 
   2   6   9   11.66    0.83 
   2  -6  -9   13.47    0.78 
  -2  -6   9   12.62    0.81 
  -2   6  -9   11.49    0.76 
   2   6   9   12.59    0.72 
   3   6  -9   19.96    1.07 
   3  -6   9   21.57    1.08 
  -3  -6  -9   21.62    1.13 
  -3   6   9   21.74    1.15 
  -3   6  -9   20.20    1.00 
  -3  -6   9   23.52    1.02 
   3   6   9   23.16    1.14 
  -3  -6   9   21.89    1.09 
  -3   6  -9   24.53    1.17 
   3  -6  -9   22.30    1.06 
   3  -6  -9   23.58    1.07 
   4  -6   9   18.40    0.92 
  -4   6   9   17.06    1.04 
  -4  -6  -9   15.46    1.04 
   4  -6   9   15.65    0.97 
   4   6  -9   17.45    1.03 
   4  -6  -9   17.60    0.95 
   4   6   9   18.25    1.08 
  -4  -6   9   16.70    0.98 
   4  -6  -9   19.40    1.02 
  -4  -6   9   18.30    0.98 
  -4   6  -9   18.35    1.10 
   5   6  -9    5.93    0.72 
  -5  -6  -9    6.24    0.78 
  -5   6   9    6.66    0.83 
   5  -6   9    4.57    0.63 
   5  -6  -9    5.95    0.62 
   5   6   9    5.59    0.76 
  -5  -6   9    7.57    0.72 
   5  -6  -9    6.85    0.71 
  -5  -6   9    6.74    0.70 
  -5   6  -9    7.69    0.83 
   6  -6   9    6.15    0.75 
  -6   6   9    5.77    0.80 
  -6  -6  -9    5.55    0.78 
   6   6  -9    7.16    0.80 
  -6  -6   9    6.37    0.73 
   6   6   9    8.40    0.87 
  -6   6  -9    7.74    0.91 
  -6  -6   9    7.36    0.76 
   6  -6  -9    7.66    0.81 
   7   6  -9    0.59    0.47 
   7   6  -9    0.52    0.38 
  -7  -6  -9    0.96    0.50 
  -7   6   9    0.89    0.50 
   7  -6   9    1.34    0.48 
   7   6   9    0.90    0.48 
   7  -6  -9    0.85    0.48 
  -7   6  -9   -0.08    0.42 
  -7  -6   9    0.90    0.42 
   0   7   9    6.93    0.63 
   0  -7   9    5.82    0.65 
   0   7  -9    6.15    0.65 
   0  -7  -9    7.79    0.71 
   0   7   9    7.04    0.65 
   1  -7   9   17.06    1.00 
   1   7  -9   19.25    1.05 
  -1   7   9   17.37    1.01 
  -1  -7  -9   19.01    1.06 
   1   7   9   20.65    1.00 
  -1  -7   9   19.42    1.07 
   1  -7  -9   17.86    1.00 
  -1   7  -9   18.07    0.97 
   1   7   9   19.01    1.01 
  -1   7  -9   19.16    1.03 
   2  -7   9   14.37    0.93 
  -2  -7  -9   15.04    0.98 
   2   7  -9   13.01    0.92 
  -2   7   9   16.18    0.98 
   2   7   9   13.49    0.91 
  -2   7  -9   14.05    0.91 
  -2  -7   9   13.21    0.89 
   2  -7  -9   13.81    0.87 
  -2   7  -9   14.43    0.89 
   2  -7  -9   16.01    0.88 
  -3  -7  -9    9.25    0.84 
  -3   7   9    8.82    0.85 
   3   7  -9    9.43    0.83 
   3  -7   9   10.55    0.83 
   3  -7  -9    8.78    0.75 
  -3   7  -9    9.94    0.74 
  -3  -7   9    9.96    0.81 
   3  -7  -9    9.87    0.77 
  -3   7  -9    9.33    0.83 
   3   7   9    9.52    0.83 
   4  -7   9    0.14    0.31 
  -4  -7  -9    0.28    0.39 
  -4   7   9    0.06    0.35 
   4   7  -9    0.40    0.37 
   4  -7  -9   -0.03    0.31 
   4  -7  -9    0.41    0.35 
  -4  -7   9    0.87    0.42 
  -4   7  -9   -0.07    0.34 
  -4   7  -9    0.46    0.29 
  -4  -7   9    0.60    0.34 
   4   7   9    0.16    0.36 
  -5   7   9    8.05    0.88 
  -5  -7  -9    8.45    0.91 
   5  -7   9    7.82    0.82 
   5   7  -9    8.79    0.89 
   5  -7  -9    9.22    0.83 
  -5  -7   9    8.23    0.81 
   5   7   9    8.13    0.86 
  -5   7  -9    8.45    0.92 
  -5  -7   9    8.61    0.80 
   6  -7   9    1.04    0.46 
  -6   7   9    0.43    0.43 
  -6  -7  -9    0.71    0.48 
   6   7  -9    1.12    0.51 
   6   7   9    0.29    0.41 
  -6  -7   9    1.16    0.43 
  -6  -7   9    1.31    0.45 
  -6   7  -9    0.44    0.47 
   6  -7  -9    1.46    0.53 
   7   7  -9    1.85    0.57 
  -7  -7   9    1.85    0.56 
   0  -8  -9    0.23    0.35 
   0   8  -9    0.14    0.29 
   0  -8   9    0.18    0.30 
   0   8   9    0.04    0.28 
  -1   8   9   12.20    0.89 
   1  -8   9    9.93    0.87 
   1   8  -9   13.80    0.97 
  -1  -8  -9   11.33    0.93 
  -1   8  -9   12.21    0.89 
   1   8   9   12.93    0.92 
   1  -8  -9   10.79    0.85 
  -1  -8   9   11.19    0.91 
   2   8  -9    0.95    0.39 
   2  -8   9    0.49    0.35 
  -2   8   9    0.32    0.36 
  -2  -8  -9    0.85    0.42 
   2   8   9    0.51    0.36 
  -2  -8   9    0.33    0.36 
  -2   8  -9    0.23    0.34 
  -2   8  -9    0.95    0.43 
   2  -8  -9    1.34    0.41 
  -3  -8  -9    8.09    0.83 
   3  -8   9    7.78    0.81 
   3   8  -9    9.00    0.89 
  -3   8   9    8.01    0.87 
  -3   8  -9    9.16    0.88 
   3   8   9    8.73    0.87 
   3  -8  -9    8.88    0.82 
  -3  -8   9    9.95    0.88 
  -3   8  -9    9.01    0.78 
   4   8  -9   11.54    1.01 
  -4   8   9    9.88    0.98 
  -4  -8  -9    8.04    0.89 
   4  -8   9   11.00    0.95 
  -4   8  -9    8.47    0.92 
   4   8   9    9.56    0.93 
   4  -8  -9    9.64    0.87 
  -4  -8   9    7.92    0.82 
   5   8  -9    3.62    0.71 
  -5  -8  -9    4.42    0.77 
  -5   8   9    3.50    0.72 
   5  -8   9    4.20    0.75 
   5  -8  -9    4.18    0.74 
  -5   8  -9    3.02    0.70 
   5   8   9    5.04    0.77 
  -5  -8   9    3.89    0.66 
   0  -9   9    2.73    0.61 
   0   9  -9    2.94    0.57 
   0  -9  -9    3.67    0.64 
  -1  -9  -9   -0.13    0.36 
   1  -9   9    0.47    0.43 
   1   9  -9   -0.19    0.34 
  -1   9   9   -0.20    0.31 
  -1  -9   9    0.12    0.38 
  -1   9  -9    0.00    0.32 
   2   9  -9   10.16    0.97 
  -2   9   9    9.89    0.95 
   2  -9   9   10.51    0.96 
  -2  -9  -9    9.25    0.94 
  -2  -9   9   11.29    0.96 
  -2   9  -9    9.55    0.88 
   2   9   9   11.89    1.03 
   3   9  -9    3.99    0.74 
  -3   9   9    5.71    0.86 
  -3  -9  -9    5.00    0.79 
   3  -9   9    4.88    0.76 
   3   9   9    4.53    0.77 
  -3  -9   9    5.35    0.80 
  -3   9  -9    4.26    0.74 
  -4  -9  -9    6.58    0.94 
   4   9   9    9.28    1.04 
   4  -9  -9    5.34    0.77 
  -4   9  -9    8.43    0.97 
  -4  -9   9    6.24    0.87 
   0  10  -9   22.13    1.58 
  -1  10  -9   21.19    1.33 
   0   0  10   70.71    1.74 
   0   0  10   72.71    1.68 
   0   0  10   74.73    1.57 
   0   0 -10   71.07    1.68 
  -1   0  10   93.58    2.00 
   1   0  10   94.65    1.87 
  -1   0  10   88.93    2.09 
   1   0  10   93.61    2.16 
  -1   0  10   90.93    2.09 
   1   0  10   88.06    2.08 
  -1   0  10   90.94    2.01 
  -1   0 -10   91.97    2.03 
  -2   0  10    9.61    0.48 
   2   0 -10    9.42    0.48 
  -2   0 -10   10.01    0.48 
  -2   0 -10    9.31    0.51 
  -2   0  10    9.73    0.40 
   2   0  10   10.05    0.35 
   2   0  10    9.44    0.52 
  -2   0  10    9.30    0.52 
   3   0  10   45.17    1.08 
  -3   0 -10   44.53    1.22 
   3   0 -10   44.83    1.30 
   3   0 -10   44.58    1.09 
  -3   0  10   45.36    1.23 
  -3   0  10   41.88    1.32 
   3   0  10   43.93    1.33 
  -4   0 -10   66.72    1.87 
   4   0 -10   70.09    1.58 
   4   0 -10   67.74    1.87 
  -4   0 -10   70.77    1.79 
   4   0  10   69.79    1.62 
   4   0  10   66.95    1.87 
  -4   0  10   68.60    1.93 
  -4   0  10   69.14    1.74 
   5   0 -10   21.14    0.98 
  -5   0  10   20.54    1.00 
  -5   0 -10   23.02    0.94 
  -5   0  10   22.25    0.86 
   5   0  10   22.71    0.82 
  -5   0 -10   23.02    0.99 
   5   0  10   21.52    0.98 
  -6   0  10    1.98    0.45 
   6   0 -10    2.20    0.42 
  -6   0 -10    1.54    0.39 
  -6   0 -10    2.09    0.39 
   6   0  10    2.26    0.42 
  -7   0  10    4.92    0.68 
  -7   0 -10    3.93    0.60 
   7   0  10    5.13    0.60 
   7   0 -10    4.22    0.65 
  -7   0 -10    4.18    0.58 
   8   0 -10    9.09    0.87 
  -8   0 -10   10.22    0.82 
   8   0  10    8.77    0.79 
  -8   0  10    9.11    0.87 
  -9   0  10    0.46    0.42 
   9   0 -10    1.44    0.54 
   0  -1  10    5.33    0.32 
   0  -1  10    6.30    0.39 
   0   1  10    5.86    0.34 
   0   1  10    5.72    0.39 
   0  -1  10    5.25    0.37 
   0  -1 -10    5.56    0.26 
   0  -1 -10    5.96    0.40 
   0  -1  10    5.89    0.34 
  -1  -1 -10   59.95    1.51 
   1  -1  10   60.21    1.39 
   1  -1  10   58.06    1.51 
  -1   1  10   59.98    1.35 
  -1   1  10   59.90    1.54 
  -1   1  10   58.40    1.53 
  -1  -1  10   57.97    1.45 
  -1  -1  10   58.07    1.45 
  -1   1 -10   60.04    1.53 
   1  -1 -10   62.39    1.40 
   1   1  10   57.33    1.53 
  -1   1 -10   59.92    1.35 
  -1  -1  10   59.49    1.45 
  -1  -1  10   58.67    1.46 
   1   1  10   60.31    1.50 
  -2   1  10   97.53    1.98 
  -2  -1 -10   96.13    2.24 
   2   1 -10   96.57    2.15 
  -2   1  10   96.26    2.27 
  -2   1  10   95.49    2.29 
   2  -1  10   96.08    2.27 
   2  -1  10   98.73    2.10 
   2   1  10   93.25    2.23 
   2  -1 -10   94.87    2.15 
  -2  -1  10   92.62    2.19 
  -2  -1  10   95.29    2.10 
  -2   1 -10   92.65    2.25 
   2   1  10   91.33    2.23 
  -2   1 -10   97.55    2.02 
  -2  -1  10   94.95    2.22 
  -3   1  10    7.50    0.50 
  -3   1  10    6.85    0.46 
   3  -1  10    6.70    0.39 
  -3  -1 -10    6.85    0.47 
  -3  -1 -10    7.35    0.50 
   3  -1  10    7.71    0.51 
   3   1 -10    6.56    0.39 
   3   1 -10    5.96    0.46 
   3  -1 -10    6.92    0.48 
   3  -1 -10    7.24    0.27 
  -3  -1  10    7.13    0.40 
  -3   1 -10    7.42    0.40 
   3   1  10    7.63    0.29 
   3   1  10    6.27    0.48 
  -3  -1  10    7.81    0.52 
   4  -1  10   13.75    0.62 
  -4   1  10   13.18    0.67 
  -4   1  10   13.61    0.75 
   4  -1  10   13.23    0.71 
   4   1 -10   13.99    0.61 
   4   1 -10   14.78    0.75 
  -4  -1 -10   13.59    0.73 
  -4  -1 -10   13.78    0.70 
  -4  -1  10   12.82    0.74 
   4  -1 -10   13.21    0.73 
  -4   1 -10   12.81    0.60 
   4   1  10   13.14    0.73 
  -4   1 -10   14.11    0.76 
  -4  -1  10   15.06    0.58 
   4   1  10   13.98    0.51 
  -5   1  10   13.64    0.82 
  -5   1  10   14.43    0.74 
   5  -1  10   14.29    0.68 
  -5  -1 -10   13.45    0.77 
  -5  -1 -10   15.46    0.79 
   5  -1  10   14.07    0.78 
   5   1 -10   16.35    0.85 
   5   1  10   14.25    0.81 
  -5   1 -10   12.92    0.80 
  -5  -1  10   13.44    0.82 
  -5   1 -10   15.32    0.70 
   5  -1 -10   14.04    0.82 
   6   1 -10   18.64    0.99 
  -6   1  10   19.80    1.04 
  -6  -1 -10   20.32    0.99 
   6  -1  10   19.27    0.87 
  -6  -1 -10   19.49    0.94 
  -6   1  10   20.37    0.94 
   6  -1  10   18.34    0.94 
  -6   1 -10   21.13    1.06 
  -6  -1  10   21.56    1.09 
   6   1  10   20.78    1.04 
   6  -1 -10   19.91    1.06 
  -7   1  10    5.45    0.68 
  -7  -1 -10    5.66    0.63 
   7  -1  10    5.28    0.60 
   7   1 -10    5.88    0.69 
  -7  -1 -10    6.08    0.67 
  -7   1 -10    6.42    0.68 
  -7  -1  10    6.04    0.71 
   7   1  10    6.80    0.70 
   7  -1 -10    6.70    0.73 
  -8  -1 -10    4.01    0.63 
   8  -1  10    4.17    0.60 
   8   1 -10    4.84    0.72 
  -8   1  10    3.36    0.60 
   8  -1 -10    3.41    0.63 
  -8  -1  10    4.00    0.69 
   8   1  10    4.10    0.64 
  -8   1 -10    3.68    0.61 
   9   1 -10   14.27    1.12 
  -9   1  10   13.44    1.10 
   9   1  10   14.74    1.08 
  -9  -1  10   17.13    1.26 
   9  -1 -10   15.32    1.21 
   0   2 -10   53.87    1.40 
   0  -2  10   54.52    1.41 
   0  -2  10   53.66    1.44 
   0  -2  10   56.13    1.28 
   0   2  10   54.92    1.36 
   0  -2 -10   54.23    1.48 
   0   2  10   55.33    1.48 
   0  -2 -10   56.99    1.22 
  -1  -2 -10   23.32    0.87 
  -1   2  10   24.54    0.89 
   1  -2  10   24.13    0.86 
   1  -2  10   24.31    0.79 
  -1   2  10   23.97    0.69 
   1   2 -10   24.56    0.76 
  -1  -2  10   23.67    0.82 
  -1  -2  10   24.75    0.78 
  -1   2 -10   24.94    0.62 
   1   2  10   24.26    0.82 
   1   2  10   24.68    0.87 
  -1  -2  10   23.48    0.82 
   1  -2 -10   24.87    0.88 
  -1   2 -10   22.81    0.84 
   1  -2 -10   23.90    0.74 
  -2  -2 -10   68.11    1.80 
  -2   2  10   71.66    1.43 
  -2   2  10   68.59    1.81 
  -2   2  10   66.99    1.79 
   2  -2  10   68.71    1.68 
   2   2 -10   68.98    1.72 
   2  -2  10   66.76    1.77 
  -2  -2  10   71.11    1.61 
   2   2  10   70.36    1.80 
   2   2  10   67.62    1.79 
   2  -2 -10   69.51    1.71 
  -2  -2  10   70.45    1.77 
  -2  -2  10   70.10    1.80 
  -2   2 -10   69.45    1.83 
  -2   2 -10   73.21    1.47 
   3  -2  10   29.51    1.05 
   3   2 -10   29.61    0.98 
  -3  -2 -10   29.99    1.08 
  -3   2  10   29.11    1.08 
  -3   2  10   29.68    1.05 
   3  -2  10   29.67    0.96 
  -3  -2  10   32.87    0.85 
   3   2  10   30.37    1.10 
  -3   2 -10   31.21    0.79 
  -3   2 -10   31.52    1.13 
   3  -2 -10   31.11    1.06 
  -3  -2  10   30.87    1.08 
   3   2  10   30.92    1.05 
  -3  -2  10   29.29    1.06 
   4  -2  10   10.91    0.64 
  -4  -2 -10   10.29    0.70 
  -4   2  10    8.63    0.63 
   4   2 -10   10.00    0.58 
  -4  -2 -10   10.35    0.61 
   4  -2  10   10.59    0.60 
  -4   2  10   10.86    0.67 
   4   2 -10   10.46    0.65 
   4  -2 -10   11.13    0.68 
   4   2  10   10.28    0.68 
  -4  -2  10   10.98    0.68 
  -4   2 -10   10.91    0.72 
   5  -2  10   50.46    1.56 
   5   2 -10   46.35    1.58 
   5  -2  10   49.28    1.50 
  -5  -2 -10   49.85    1.52 
  -5  -2 -10   48.44    1.62 
  -5   2  10   49.91    1.60 
   5   2 -10   49.59    1.48 
  -5   2  10   47.31    1.62 
   5  -2 -10   49.67    1.62 
  -5   2 -10   47.01    1.63 
  -5  -2  10   46.06    1.61 
   5   2  10   49.20    1.64 
   6  -2  10    2.45    0.43 
   6  -2  10    1.93    0.39 
  -6   2  10    1.68    0.39 
  -6   2  10    2.22    0.46 
  -6  -2 -10    2.89    0.44 
   6   2 -10    3.01    0.51 
  -6  -2 -10    2.25    0.45 
   6  -2 -10    2.22    0.47 
   6   2  10    2.41    0.46 
  -6  -2  10    2.94    0.51 
  -6   2 -10    2.19    0.44 
  -7   2  10    0.33    0.28 
   7   2 -10   -0.03    0.25 
  -7   2  10   -0.39    0.23 
  -7  -2 -10    0.06    0.30 
   7  -2  10    0.02    0.26 
   7  -2  10   -0.10    0.25 
   7   2  10    0.38    0.29 
   7  -2 -10    0.43    0.38 
  -7   2 -10    0.06    0.29 
  -7  -2  10    0.20    0.28 
   8   2 -10    6.31    0.75 
  -8   2  10    7.07    0.78 
  -8  -2 -10    6.67    0.83 
  -8  -2  10    6.74    0.79 
  -8   2 -10    5.76    0.77 
   8   2  10    7.37    0.78 
   8  -2 -10    6.18    0.81 
  -9  -2 -10    9.77    0.96 
   9   2 -10    8.57    0.97 
  -9   2  10   10.39    0.97 
   9   2  10    9.33    0.95 
  -9   2 -10   10.75    1.03 
  -9  -2  10   10.11    1.02 
   9  -2 -10   10.08    1.05 
   0   3  10    1.19    0.22 
   0  -3 -10    1.39    0.29 
   0   3 -10    1.24    0.23 
   0  -3  10    1.44    0.18 
   0  -3 -10    1.58    0.20 
   0  -3  10    0.95    0.23 
   0   3  10    1.73    0.31 
   0  -3  10    1.20    0.26 
  -1   3  10    1.68    0.29 
   1  -3  10    2.21    0.32 
  -1  -3 -10    1.97    0.15 
  -1   3  10    2.04    0.23 
  -1  -3 -10    1.48    0.30 
   1  -3  10    1.66    0.29 
   1   3 -10    1.92    0.24 
   1   3 -10    1.81    0.28 
  -1   3 -10    1.90    0.29 
   1   3  10    2.01    0.31 
  -1  -3  10    2.17    0.26 
   1  -3 -10    1.76    0.31 
  -1  -3  10    1.57    0.27 
   1  -3 -10    2.53    0.29 
   1   3  10    2.12    0.31 
   2   3 -10   52.10    1.49 
  -2   3  10   50.34    1.54 
  -2   3  10   54.92    1.15 
   2   3 -10   52.29    1.25 
   2  -3  10   49.30    1.49 
   2  -3  10   49.78    1.44 
  -2  -3 -10   53.81    1.57 
   2   3  10   50.13    1.48 
  -2  -3  10   52.73    1.45 
   2   3  10   52.80    1.53 
   2  -3 -10   54.45    1.44 
  -2   3 -10   51.86    1.54 
  -2  -3  10   54.44    1.54 
   3  -3  10   28.16    1.02 
  -3  -3 -10   26.94    1.11 
   3  -3  10   30.67    1.08 
   3   3 -10   29.62    1.05 
  -3   3  10   29.27    1.11 
  -3   3  10   30.09    1.14 
  -3  -3  10   28.27    1.08 
   3   3  10   26.62    1.08 
  -3  -3  10   29.54    1.06 
   3  -3 -10   28.37    1.05 
  -3   3 -10   27.98    1.10 
   3   3  10   29.77    1.02 
   4  -3  10   33.58    1.18 
   4   3 -10   32.65    1.16 
   4  -3  10   32.70    1.16 
  -4   3  10   30.64    1.21 
  -4  -3 -10   30.83    1.11 
  -4  -3 -10   32.85    1.27 
  -4   3  10   30.46    1.23 
   4  -3 -10   28.98    1.18 
   4   3  10   32.43    1.25 
  -4   3 -10   33.73    1.29 
  -4  -3  10   31.25    1.21 
  -4  -3  10   32.86    1.21 
   5  -3  10   15.10    0.81 
  -5   3  10   14.69    0.88 
  -5   3  10   17.00    0.92 
   5   3 -10   18.11    0.87 
   5   3 -10   15.64    0.89 
  -5  -3 -10   14.12    0.91 
  -5  -3 -10   16.80    0.80 
   5  -3  10   16.85    0.86 
  -5  -3  10   17.62    0.94 
  -5   3 -10   16.35    0.97 
   5   3  10   16.20    0.92 
   5  -3 -10   15.76    0.92 
   6  -3  10   16.22    0.90 
   6  -3  10   17.36    0.90 
   6   3 -10   16.44    0.96 
  -6   3  10   17.83    1.00 
  -6   3  10   16.61    0.96 
  -6  -3 -10   16.42    1.00 
   6   3 -10   15.44    0.88 
   6   3  10   14.46    0.91 
  -6  -3  10   14.21    0.94 
  -6   3 -10   14.50    0.97 
   6  -3 -10   15.50    0.97 
   7  -3  10    3.39    0.53 
  -7   3  10    4.18    0.62 
   7  -3  10    2.71    0.50 
   7   3 -10    3.38    0.56 
  -7   3  10    3.53    0.57 
  -7  -3 -10    3.97    0.64 
   7   3  10    3.93    0.59 
  -7   3 -10    3.08    0.59 
  -7  -3  10    3.74    0.62 
   7  -3 -10    3.69    0.64 
   8   3 -10   22.12    1.27 
  -8  -3 -10   20.09    1.26 
  -8   3  10   22.46    1.28 
  -8   3  10   20.62    1.19 
   8  -3  10   20.97    1.18 
   8  -3 -10   18.44    1.23 
  -8  -3  10   19.49    1.26 
  -8   3 -10   21.09    1.30 
   8   3  10   23.04    1.29 
  -9  -3 -10    6.90    0.95 
   9   3 -10    6.95    0.99 
  -9   3  10    8.57    0.93 
  -9   3 -10    6.22    0.94 
   9   3  10    6.44    0.89 
   0   4 -10   48.78    1.50 
   0   4 -10   49.10    1.39 
   0  -4  10   53.29    1.20 
   0  -4  10   49.98    1.50 
   0  -4 -10   46.76    1.51 
   0   4  10   50.14    1.52 
   0   4  10   52.12    1.40 
   0  -4 -10   51.08    1.27 
   1   4 -10    0.52    0.23 
   1  -4  10    0.61    0.23 
   1  -4  10    0.92    0.27 
  -1  -4 -10    0.59    0.29 
   1   4 -10    0.97    0.22 
  -1   4  10    0.79    0.27 
  -1   4  10    0.80    0.20 
  -1  -4  10    1.12    0.21 
   1   4  10    0.55    0.24 
   1  -4 -10    0.70    0.27 
   1   4  10    0.69    0.24 
   1  -4 -10    1.00    0.24 
  -1   4 -10    0.76    0.26 
  -1  -4  10    0.52    0.23 
   2  -4  10   30.71    1.11 
   2  -4  10   31.09    1.12 
  -2  -4 -10   30.23    1.19 
  -2   4  10   29.10    1.14 
   2   4 -10   29.36    1.10 
  -2  -4  10   26.32    1.07 
   2  -4 -10   30.36    1.14 
  -2  -4  10   29.86    1.01 
   2   4  10   30.48    1.07 
   2  -4 -10   31.30    1.07 
   2   4  10   31.07    1.15 
  -2   4 -10   29.45    1.12 
   3  -4  10   27.12    1.06 
  -3   4  10   25.14    1.11 
   3   4 -10   26.57    1.07 
   3  -4  10   24.86    1.01 
  -3  -4 -10   25.61    1.11 
  -3  -4  10   26.97    1.04 
   3   4  10   25.24    0.98 
   3   4  10   25.43    1.10 
  -3  -4  10   26.60    1.08 
   3  -4 -10   29.50    1.08 
  -3   4 -10   28.01    1.15 
   3  -4 -10   24.28    1.06 
  -4   4  10   23.11    1.05 
  -4  -4 -10   20.63    1.08 
   4  -4  10   22.16    1.00 
   4   4 -10   24.05    1.04 
  -4   4  10   21.56    1.08 
   4  -4  10   21.87    0.99 
  -4   4 -10   21.81    1.07 
   4   4  10   22.45    1.07 
  -4  -4  10   20.84    0.99 
   4   4  10   21.49    0.90 
   4  -4 -10   21.11    1.00 
  -4  -4  10   22.10    1.03 
   4  -4 -10   24.43    1.07 
  -5   4  10   11.47    0.84 
  -5   4  10   14.34    0.86 
   5  -4  10   14.04    0.81 
  -5  -4 -10   12.74    0.90 
   5  -4  10   12.93    0.82 
   5   4 -10   13.85    0.83 
  -5   4 -10   14.09    0.94 
  -5  -4  10   12.74    0.84 
  -5  -4  10   12.23    0.82 
   5   4  10   13.04    0.85 
   5  -4 -10   12.69    0.87 
   6  -4  10    1.58    0.39 
   6  -4  10    1.96    0.40 
  -6  -4 -10    1.02    0.43 
  -6   4  10    1.73    0.45 
   6   4 -10    1.69    0.41 
   6   4 -10    1.36    0.40 
  -6   4  10    2.85    0.50 
   6   4  10    1.96    0.48 
  -6   4 -10    2.46    0.52 
   6  -4 -10    2.45    0.54 
  -6  -4  10    2.89    0.52 
  -7  -4 -10    0.87    0.42 
  -7   4  10    0.69    0.38 
   7   4 -10    1.34    0.43 
   7  -4  10    1.49    0.43 
  -7   4  10    1.13    0.41 
  -7   4 -10    0.84    0.48 
   7  -4 -10    0.91    0.45 
   7   4  10    0.94    0.44 
  -7  -4  10    0.82    0.37 
  -8   4  10    3.57    0.65 
  -8  -4 -10    4.16    0.73 
  -8   4  10    4.99    0.74 
   8  -4  10    3.81    0.65 
   8   4 -10    3.25    0.61 
  -8  -4  10    3.82    0.70 
  -8   4 -10    3.86    0.75 
   8   4  10    4.84    0.74 
   8  -4 -10    5.46    0.82 
   0   5  10    2.93    0.42 
   0   5  10    2.96    0.40 
   0  -5 -10    2.17    0.42 
   0  -5 -10    2.73    0.33 
   0  -5  10    2.29    0.40 
   0   5 -10    2.76    0.38 
   0   5 -10    2.09    0.38 
  -1  -5 -10    3.47    0.48 
  -1   5  10    3.99    0.39 
   1   5 -10    4.46    0.52 
  -1   5  10    4.64    0.52 
   1  -5  10    3.99    0.48 
  -1  -5  10    4.13    0.49 
  -1   5 -10    5.33    0.52 
   1  -5 -10    4.90    0.53 
   1   5  10    4.31    0.50 
   1   5  10    4.24    0.46 
  -1   5 -10    4.49    0.52 
   1  -5 -10    5.50    0.46 
   2   5 -10   18.70    0.93 
   2  -5  10   17.50    0.86 
   2  -5  10   18.21    0.91 
  -2   5  10   18.03    0.95 
  -2  -5 -10   17.43    0.96 
   2  -5 -10   16.40    0.81 
   2  -5 -10   19.25    0.92 
   2   5  10   17.53    0.82 
   2   5  10   16.86    0.90 
  -2   5 -10   17.39    0.91 
  -2  -5  10   18.34    0.79 
  -3  -5 -10    6.47    0.68 
   3   5 -10    6.87    0.64 
   3  -5  10    6.53    0.60 
  -3   5  10    7.69    0.67 
   3  -5  10    6.84    0.58 
   3   5  10    8.07    0.57 
   3  -5 -10    6.74    0.61 
  -3  -5  10    6.58    0.61 
  -3  -5  10    7.13    0.55 
  -3   5 -10    7.30    0.69 
   3   5  10    6.53    0.64 
   3  -5 -10    6.33    0.59 
   4  -5  10    0.64    0.28 
   4  -5  10    0.61    0.29 
   4   5 -10    0.34    0.29 
  -4  -5 -10    0.37    0.32 
  -4   5  10    0.87    0.37 
  -4  -5  10    0.69    0.32 
  -4   5 -10    0.42    0.36 
   4  -5 -10    1.03    0.34 
  -4  -5  10    0.54    0.29 
   4   5  10    0.83    0.36 
   4  -5 -10    0.38    0.28 
   5  -5  10    3.23    0.54 
   5   5 -10    3.13    0.55 
  -5   5  10    3.67    0.58 
   5  -5  10    3.35    0.48 
  -5  -5 -10    3.16    0.57 
  -5  -5  10    2.65    0.48 
   5  -5 -10    3.45    0.57 
   5  -5 -10    3.08    0.49 
   5   5  10    2.50    0.51 
  -5   5 -10    2.87    0.55 
  -5  -5  10    2.33    0.45 
   6  -5  10    4.64    0.66 
  -6   5  10    5.04    0.63 
  -6  -5 -10    4.77    0.74 
   6   5 -10    4.17    0.62 
  -6   5  10    5.39    0.66 
   6  -5 -10    5.54    0.73 
  -6   5 -10    5.06    0.72 
   6  -5 -10    5.58    0.62 
  -6  -5  10    5.52    0.68 
   6   5  10    4.57    0.67 
  -6  -5  10    5.60    0.68 
   7   5 -10    2.37    0.55 
   7  -5  10    2.78    0.57 
  -7  -5 -10    1.56    0.55 
   7   5 -10    2.53    0.58 
  -7   5  10    3.54    0.61 
  -7   5  10    2.80    0.59 
  -7  -5  10    2.09    0.54 
  -7   5 -10    1.92    0.60 
   7   5  10    2.91    0.60 
   7  -5 -10    2.72    0.60 
   8  -5  10   13.05    1.05 
   8   5 -10   11.82    1.00 
  -8   5  10   14.87    1.15 
  -8  -5 -10   11.34    1.21 
   8   5  10   12.03    1.24 
   8  -5 -10   12.51    1.28 
  -8  -5  10   15.06    1.16 
  -8   5 -10   13.41    1.33 
   0   6 -10   55.64    1.81 
   0   6  10   58.15    1.69 
   0   6 -10   57.16    1.67 
   0  -6 -10   54.04    1.82 
   0  -6  10   54.52    1.80 
   0   6  10   56.45    1.80 
  -1   6  10    6.73    0.63 
  -1  -6 -10    5.49    0.63 
   1  -6  10    5.10    0.54 
   1   6 -10    5.16    0.58 
   1   6  10    5.85    0.57 
   1  -6 -10    5.83    0.53 
   1  -6 -10    6.00    0.61 
  -1   6 -10    6.10    0.60 
   1   6  10    6.88    0.58 
  -1   6 -10    5.39    0.56 
  -1  -6  10    5.80    0.61 
  -2   6  10  100.84    2.82 
   2   6 -10  104.06    2.82 
   2  -6  10  106.56    2.82 
  -2  -6 -10  105.29    2.87 
  -2  -6  10  101.72    2.77 
   2  -6 -10  106.96    2.66 
   2  -6 -10  103.26    2.75 
   2   6  10  103.18    2.64 
   2   6  10  102.35    2.76 
  -2   6 -10  103.46    2.75 
  -2   6 -10  104.47    2.77 
   3  -6  10   12.61    0.85 
  -3   6  10   13.60    0.94 
  -3  -6 -10   12.80    0.92 
   3   6 -10   13.93    0.91 
   3   6  10   12.78    0.89 
  -3   6 -10   11.51    0.77 
  -3  -6  10   13.63    0.79 
  -3  -6  10   12.31    0.84 
  -3   6 -10   12.22    0.89 
   3  -6 -10   13.16    0.83 
   3  -6 -10   14.05    0.83 
  -4  -6 -10    4.87    0.70 
  -4   6  10    4.83    0.66 
   4  -6  10    4.69    0.54 
   4   6 -10    5.66    0.68 
   4  -6  10    6.21    0.65 
  -4   6 -10    6.39    0.74 
   4  -6 -10    5.23    0.59 
  -4  -6  10    4.42    0.63 
   4  -6 -10    5.14    0.61 
  -4  -6  10    3.77    0.54 
   4   6  10    5.70    0.69 
   5  -6  10    6.79    0.72 
   5  -6  10    7.96    0.69 
  -5  -6 -10    8.09    0.84 
  -5   6  10    7.24    0.82 
   5   6 -10    7.74    0.79 
   5  -6 -10    7.40    0.76 
  -5  -6  10    7.75    0.74 
   5   6  10    7.48    0.79 
   5  -6 -10    7.04    0.69 
  -5  -6  10    7.10    0.70 
  -5   6 -10    8.34    0.86 
   6   6 -10    3.41    0.61 
   6  -6  10    3.88    0.64 
  -6  -6 -10    3.14    0.65 
  -6   6  10    3.17    0.65 
  -6   6 -10    2.74    0.62 
   6  -6 -10    3.44    0.62 
  -6  -6  10    2.93    0.57 
   6  -6 -10    3.44    0.64 
  -6  -6  10    2.47    0.56 
   6   6  10    4.81    0.74 
  -7   6  10    2.62    0.63 
   7  -6  10    4.02    0.73 
   7   6 -10    3.27    0.66 
  -7  -6 -10    1.93    0.58 
   7   6 -10    3.48    0.64 
  -7  -6  10    3.57    0.68 
   7  -6 -10    3.73    0.69 
   7   6  10    3.79    0.73 
  -7   6 -10    2.83    0.71 
   0   7  10    0.14    0.32 
   0   7 -10    1.18    0.36 
   0  -7 -10    1.07    0.37 
   0   7  10    1.35    0.40 
   0  -7  10    0.80    0.34 
   1  -7  10    6.44    0.67 
   1   7 -10    6.40    0.67 
  -1   7  10    5.13    0.60 
  -1  -7 -10    7.38    0.75 
  -1   7 -10    6.55    0.64 
  -1   7 -10    5.76    0.63 
  -1  -7  10    6.40    0.68 
   1   7  10    7.51    0.67 
   1  -7 -10    6.90    0.69 
   1   7  10    5.01    0.58 
   2  -7  10    3.64    0.58 
   2   7 -10    4.49    0.63 
  -2   7  10    4.45    0.65 
  -2  -7 -10    4.41    0.65 
  -2   7 -10    4.32    0.59 
   2  -7 -10    3.57    0.50 
   2   7  10    4.38    0.60 
  -2   7 -10    4.03    0.62 
   2  -7 -10    4.43    0.59 
  -2  -7  10    5.59    0.64 
   3   7 -10    9.53    0.84 
   3  -7  10    9.25    0.80 
  -3   7  10    9.35    0.86 
  -3  -7 -10    9.15    0.85 
   3   7  10    9.09    0.81 
  -3   7 -10    7.03    0.77 
   3  -7 -10    9.57    0.79 
  -3  -7  10   10.63    0.83 
   3  -7 -10    7.98    0.70 
  -3   7 -10    8.93    0.73 
  -4   7  10    2.13    0.53 
  -4  -7 -10    3.03    0.60 
   4   7 -10    2.38    0.55 
   4  -7  10    2.03    0.47 
  -4  -7  10    2.02    0.48 
   4   7  10    2.48    0.54 
  -4   7 -10    2.85    0.61 
   4  -7 -10    2.09    0.47 
  -4   7 -10    3.08    0.51 
   4  -7 -10    1.74    0.47 
  -5  -7 -10    5.75    0.80 
   5  -7  10    6.88    0.79 
  -5   7  10    6.67    0.80 
   5   7 -10    7.06    0.84 
   5  -7 -10    5.06    0.71 
  -5  -7  10    5.54    0.67 
  -5  -7  10    5.61    0.74 
  -5   7 -10    4.69    0.76 
   5   7  10    5.33    0.76 
   6  -7  10    0.39    0.38 
  -6   7  10    0.85    0.47 
   6   7 -10    1.41    0.55 
  -6  -7 -10    1.24    0.55 
  -6  -7  10    0.72    0.42 
   6   7  10    0.60    0.48 
   6  -7 -10    0.70    0.45 
  -6   7 -10    1.10    0.49 
  -6  -7  10    0.52    0.40 
  -7  -7  10    0.85    0.53 
   0   8  10   14.80    0.98 
   0  -8  10   14.29    1.00 
   0   8 -10   14.42    0.97 
   0  -8 -10   13.68    1.00 
   1  -8  10    9.79    0.85 
  -1   8  10    9.43    0.81 
   1   8 -10    9.71    0.86 
  -1  -8 -10    8.53    0.86 
   1  -8 -10    8.96    0.82 
  -1   8 -10   11.13    0.86 
   1   8  10    8.82    0.80 
  -1  -8  10    9.61    0.87 
   2   8 -10   32.38    1.52 
  -2   8  10   31.97    1.53 
   2  -8  10   31.44    1.49 
  -2  -8 -10   33.91    1.56 
  -2   8 -10   31.86    1.45 
   2  -8 -10   33.79    1.48 
   2   8  10   32.06    1.48 
  -2   8 -10   30.68    1.42 
  -2  -8  10   33.27    1.50 
   3   8 -10    1.36    0.47 
  -3  -8 -10    0.89    0.44 
   3  -8  10    0.37    0.34 
  -3   8  10    0.35    0.41 
   3  -8 -10    0.73    0.43 
  -3   8 -10    0.73    0.36 
   3   8  10    1.54    0.48 
  -3  -8  10    0.89    0.41 
  -3   8 -10    1.39    0.50 
   4  -8  10    1.93    0.53 
   4   8 -10    1.27    0.55 
  -4   8  10    1.28    0.51 
  -4  -8 -10    2.18    0.58 
  -4  -8  10    1.74    0.48 
  -4   8 -10    0.90    0.50 
   4  -8 -10    1.63    0.48 
   4   8  10    1.26    0.50 
   5   8 -10    1.65    0.59 
   5  -8  10    1.76    0.53 
  -5  -8 -10    1.80    0.60 
  -5   8  10    1.18    0.55 
  -5  -8  10    1.02    0.45 
   5   8  10    1.04    0.51 
  -5   8 -10    1.17    0.56 
   5  -8 -10    1.95    0.53 
   0  -9  10    7.96    0.88 
   0  -9 -10    6.53    0.82 
   0   9 -10    7.59    0.83 
   1  -9  10    2.91    0.62 
   1   9 -10    3.30    0.65 
  -1   9  10    3.46    0.65 
  -1  -9 -10    3.19    0.66 
  -1  -9  10    4.02    0.74 
  -1   9 -10    3.59    0.64 
  -2  -9 -10    6.35    0.88 
  -2   9  10    6.63    0.81 
   2  -9  10    5.51    0.81 
   2   9 -10    5.90    0.83 
   2   9  10    5.25    0.78 
  -2  -9  10    7.30    0.84 
  -2   9 -10    6.17    0.80 
  -3  -9 -10    1.37    0.50 
  -3   9  10    2.39    0.59 
   3  -9  10    1.83    0.55 
   3   9 -10    2.34    0.62 
  -3  -9  10    2.08    0.54 
  -3   9 -10    1.72    0.48 
   3   9  10    1.23    0.56 
  -3   9 -10    2.78    0.76 
  -4   9 -10    0.93    0.60 
   0   0  11    0.44    0.16 
   0   0  11    0.06    0.10 
   0   0 -11   -0.17    0.11 
   0   0  11    0.19    0.14 
  -1   0  11    8.67    0.42 
  -1   0  11    8.91    0.48 
  -1   0 -11    8.70    0.44 
  -1   0  11    8.25    0.45 
   1   0  11    8.33    0.47 
   1   0  11    9.23    0.34 
   1   0  11    8.29    0.48 
  -1   0  11    8.92    0.42 
  -2   0  11    0.09    0.16 
   2   0 -11    0.05    0.13 
  -2   0 -11    0.07    0.15 
  -2   0 -11   -0.13    0.12 
   2   0  11    0.08    0.09 
  -2   0  11    0.04    0.11 
  -2   0  11    0.23    0.14 
   2   0  11    0.01    0.15 
  -3   0  11    0.77    0.20 
  -3   0 -11    0.35    0.22 
   3   0  11    0.44    0.23 
  -3   0 -11    0.55    0.22 
   3   0 -11    0.26    0.19 
   3   0  11    0.50    0.14 
   3   0 -11    0.62    0.15 
  -3   0  11    0.21    0.18 
   4   0 -11   14.37    0.76 
   4   0  11   14.51    0.57 
  -4   0  11   15.73    0.69 
  -4   0 -11   15.92    0.79 
  -4   0 -11   15.05    0.71 
  -4   0  11   14.87    0.80 
   4   0  11   14.69    0.77 
   5   0 -11   22.64    1.05 
   5   0  11   22.74    1.03 
  -5   0  11   25.30    0.92 
  -5   0 -11   23.37    1.04 
  -5   0  11   23.08    1.06 
  -5   0 -11   22.92    0.96 
   6   0 -11   61.07    2.00 
  -6   0  11   64.17    2.05 
  -6   0 -11   64.14    1.87 
   6   0  11   60.07    1.94 
  -6   0 -11   61.72    1.94 
   7   0  11    3.51    0.57 
   7   0 -11    2.72    0.56 
  -7   0 -11    2.74    0.51 
  -7   0  11    2.81    0.54 
   8   0  11    4.99    0.69 
   8   0 -11    4.36    0.68 
  -8   0 -11    5.01    0.67 
  -8   0  11    3.87    0.64 
   9   0 -11    0.18    0.40 
  -9   0  11    0.05    0.39 
   9   0  11   -0.21    0.38 
   0  -1  11   55.22    1.47 
   0   1  11   57.58    1.53 
   0   1  11   58.53    1.42 
   0  -1  11   57.88    1.39 
   0  -1  11   56.87    1.39 
   0  -1  11   57.14    1.47 
   0  -1 -11   57.35    1.26 
   0  -1 -11   57.04    1.49 
  -1   1  11   23.84    0.71 
  -1  -1 -11   23.92    0.83 
  -1  -1 -11   24.08    0.53 
   1  -1  11   25.17    0.73 
  -1   1  11   23.54    0.85 
   1  -1  11   23.55    0.84 
  -1   1 -11   24.52    0.86 
  -1   1 -11   25.31    0.72 
   1  -1 -11   23.74    0.86 
  -1  -1  11   24.94    0.81 
   1   1  11   23.54    0.82 
  -1  -1  11   25.06    0.80 
   1  -1 -11   25.19    0.74 
  -1  -1  11   23.96    0.79 
  -1  -1  11   23.59    0.80 
  -2   1  11   55.54    1.22 
   2   1 -11   51.89    1.36 
   2  -1  11   51.82    1.46 
  -2   1  11   53.27    1.48 
  -2   1  11   52.75    1.50 
   2  -1  11   55.71    1.31 
  -2  -1 -11   53.86    1.45 
  -2  -1  11   51.69    1.44 
  -2  -1  11   52.68    1.34 
  -2  -1  11   51.93    1.41 
   2   1  11   53.70    1.49 
  -2   1 -11   53.44    1.26 
   2  -1 -11   50.76    1.36 
  -2   1 -11   47.72    1.45 
   2   1  11   52.58    1.45 
   3   1 -11   19.22    0.69 
  -3  -1 -11   19.69    0.82 
   3  -1  11   19.31    0.67 
  -3   1  11   18.36    0.83 
   3  -1  11   18.42    0.81 
  -3   1  11   18.91    0.79 
  -3  -1 -11   18.70    0.79 
   3   1 -11   19.14    0.80 
  -3   1 -11   19.81    0.68 
  -3  -1  11   20.85    0.71 
   3   1  11   19.60    0.50 
   3  -1 -11   18.25    0.78 
   3  -1 -11   20.15    0.55 
  -3  -1  11   18.59    0.82 
  -3   1 -11   20.13    0.86 
   4   1 -11   13.08    0.59 
  -4   1  11   12.79    0.74 
  -4   1  11   13.03    0.68 
  -4  -1 -11   12.06    0.70 
   4  -1  11   12.18    0.58 
  -4  -1 -11   12.86    0.71 
   4  -1  11   12.83    0.72 
  -4   1 -11   12.51    0.59 
  -4  -1  11   13.63    0.76 
  -4   1 -11   13.16    0.76 
   4  -1 -11   13.47    0.74 
  -4  -1  11   13.58    0.58 
   4   1  11   11.54    0.71 
  -5  -1 -11    1.51    0.33 
   5  -1  11    1.73    0.31 
  -5   1  11    1.36    0.36 
   5   1 -11    1.47    0.37 
   5  -1  11    0.83    0.30 
  -5   1  11    1.31    0.30 
  -5  -1 -11    1.19    0.33 
  -5  -1  11    1.18    0.35 
   5   1  11    1.44    0.37 
  -5   1 -11    1.16    0.37 
   5  -1 -11    1.30    0.36 
   6   1 -11    6.74    0.65 
  -6  -1 -11    6.39    0.60 
  -6   1  11    6.67    0.57 
  -6   1  11    7.04    0.68 
   6  -1  11    6.44    0.90 
   6  -1  11    6.48    0.60 
  -6  -1 -11    6.32    0.64 
  -6   1 -11    6.15    0.67 
   6  -1 -11    5.26    0.66 
   6   1  11    7.46    0.68 
  -6  -1  11    7.50    0.70 
  -7  -1 -11    0.53    0.34 
  -7   1  11    0.13    0.29 
   7  -1  11    0.24    0.28 
  -7  -1 -11    0.09    0.28 
   7   1 -11    0.37    0.35 
   7  -1 -11    0.32    0.33 
  -7  -1  11    0.48    0.35 
  -7   1 -11    0.05    0.32 
   7   1  11    0.32    0.31 
   8  -1  11   15.45    1.02 
  -8  -1 -11   18.35    1.13 
  -8   1  11   16.65    1.13 
   8   1 -11   15.28    1.10 
   8  -1 -11   17.19    1.12 
  -8   1 -11   15.09    1.05 
  -8  -1  11   16.81    1.16 
   8   1  11   16.34    1.10 
   9   1 -11    0.98    0.50 
  -9   1  11    0.14    0.39 
   9   1  11    0.13    0.38 
  -9  -1  11   -0.10    0.40 
   9  -1 -11    0.15    0.43 
   0  -2  11   38.42    1.16 
   0   2  11   36.47    1.18 
   0  -2 -11   38.43    1.19 
   0   2  11   39.93    1.09 
   0  -2  11   39.80    1.13 
   0   2 -11   39.97    1.14 
   0  -2  11   40.87    1.01 
   0  -2 -11   39.78    0.93 
  -1   2  11    7.68    0.37 
  -1   2  11    7.55    0.50 
  -1  -2 -11    7.08    0.47 
   1  -2  11    8.99    0.52 
   1  -2  11    7.38    0.42 
   1   2 -11    8.41    0.43 
  -1  -2  11    7.66    0.46 
  -1  -2  11    7.35    0.46 
   1  -2 -11    7.23    0.49 
  -1  -2  11    7.63    0.42 
  -1   2 -11    7.88    0.32 
   1   2  11    7.72    0.49 
  -1   2 -11    7.00    0.46 
   1   2  11    7.52    0.46 
   1  -2 -11    7.49    0.39 
  -2   2  11   96.84    2.37 
  -2   2  11  101.55    1.98 
  -2  -2 -11   97.46    2.35 
  -2   2  11   95.69    2.37 
   2   2 -11   94.08    2.25 
   2  -2  11   92.79    2.32 
   2  -2  11   94.93    2.20 
   2  -2 -11   94.51    2.21 
   2   2  11   90.24    2.29 
  -2  -2  11   96.15    2.27 
  -2  -2  11   95.95    2.31 
  -2   2 -11  100.96    1.97 
   2   2  11   92.96    2.31 
  -2   2 -11   96.46    2.36 
  -2  -2  11   98.02    2.13 
  -3   2  11    0.74    0.23 
   3   2 -11    0.68    0.22 
  -3  -2 -11    0.53    0.28 
   3  -2  11    1.14    0.24 
  -3   2  11    0.56    0.26 
   3  -2  11    0.63    0.25 
  -3   2 -11    0.63    0.25 
   3   2  11    0.30    0.21 
  -3  -2  11    0.87    0.26 
   3   2  11    0.59    0.23 
  -3  -2  11    0.88    0.17 
   3  -2 -11    0.71    0.25 
  -3  -2  11    0.97    0.26 
  -4   2  11   39.37    1.35 
   4   2 -11   40.56    1.37 
   4  -2  11   40.83    1.35 
  -4   2  11   39.61    1.40 
  -4  -2 -11   39.24    1.30 
   4  -2  11   41.83    1.26 
   4   2 -11   41.74    1.26 
  -4  -2 -11   40.97    1.39 
  -4  -2  11   41.05    1.39 
   4   2  11   39.46    1.38 
  -4   2 -11   40.26    1.41 
   4  -2 -11   40.83    1.37 
   5   2 -11   21.86    1.03 
   5  -2  11   22.58    0.94 
  -5  -2 -11   22.73    1.06 
  -5  -2 -11   22.83    0.99 
   5   2 -11   21.30    0.90 
  -5   2  11   21.76    1.00 
  -5   2  11   21.30    1.04 
   5  -2  11   21.34    0.98 
  -5  -2  11   23.77    1.09 
   5   2  11   21.35    1.05 
  -5   2 -11   21.97    1.10 
   5  -2 -11   22.65    1.05 
   6  -2  11   44.36    1.55 
   6  -2  11   44.68    1.48 
  -6  -2 -11   45.27    1.63 
  -6   2  11   43.38    1.64 
   6   2 -11   43.03    1.62 
  -6  -2 -11   46.42    1.54 
  -6   2  11   45.70    1.59 
   6  -2 -11   41.45    1.61 
  -6  -2  11   44.55    1.66 
   6   2  11   44.97    1.62 
  -6   2 -11   43.96    1.66 
   7   2 -11    3.88    0.60 
   7  -2  11    2.81    0.49 
  -7   2  11    2.90    0.51 
  -7   2  11    3.29    0.58 
  -7  -2 -11    2.55    0.54 
   7   2  11    3.45    0.57 
   7  -2 -11    2.85    0.59 
  -7   2 -11    2.66    0.55 
  -7  -2  11    2.07    0.48 
  -8   2  11   17.30    1.16 
  -8  -2 -11   17.53    1.14 
   8   2 -11   19.07    1.18 
  -8  -2  11   19.68    1.23 
   8  -2 -11   19.39    1.23 
  -8   2 -11   17.97    1.17 
   8   2  11   19.07    1.18 
  -9  -2 -11    1.56    0.54 
  -9   2  11    1.80    0.55 
   9   2 -11    1.74    0.57 
  -9   2 -11    1.04    0.55 
   9  -2 -11    1.74    0.92 
   9   2  11    0.96    0.46 
   0   3  11   20.41    0.72 
   0  -3  11   18.86    0.80 
   0  -3 -11   20.37    0.60 
   0  -3  11   20.29    0.80 
   0   3  11   17.60    0.79 
   0  -3  11   20.52    0.61 
   0  -3 -11   17.59    0.80 
   0   3 -11   19.90    0.75 
   1   3 -11   16.28    0.63 
   1  -3  11   17.79    0.73 
   1  -3  11   17.03    0.75 
  -1   3  11   17.67    0.60 
  -1   3  11   14.50    0.73 
   1   3 -11   17.51    0.76 
  -1  -3 -11   17.18    0.80 
  -1  -3  11   17.59    0.65 
   1   3  11   16.41    0.71 
  -1   3 -11   16.88    0.74 
   1  -3 -11   16.22    0.77 
   1  -3 -11   16.69    0.64 
   1   3  11   16.86    0.74 
  -1  -3  11   15.76    0.72 
   2   3 -11   25.81    0.77 
   2  -3  11   24.19    0.95 
   2   3 -11   26.46    0.98 
  -2   3  11   25.26    1.02 
  -2   3  11   25.18    0.67 
  -2  -3 -11   25.86    1.04 
   2  -3  11   23.98    0.91 
  -2   3 -11   25.68    1.02 
  -2  -3  11   24.97    0.97 
  -2  -3  11   27.27    0.94 
   2  -3 -11   27.49    1.04 
   2   3  11   26.69    1.01 
   2   3  11   26.41    0.98 
   2  -3 -11   26.58    0.93 
   3  -3  11    1.41    0.29 
   3   3 -11    1.48    0.32 
  -3   3  11    1.97    0.38 
  -3  -3 -11    1.43    0.38 
  -3   3  11    1.29    0.33 
   3  -3  11    1.11    0.27 
   3   3  11    1.53    0.31 
   3   3  11    2.47    0.41 
  -3  -3  11    1.45    0.31 
  -3  -3  11    1.73    0.33 
  -3   3 -11    1.16    0.31 
   3  -3 -11    1.54    0.34 
   4  -3  11    4.45    0.48 
  -4   3  11    5.25    0.55 
  -4  -3 -11    4.02    0.53 
  -4   3  11    4.20    0.54 
  -4  -3 -11    5.02    0.48 
   4  -3  11    4.25    0.48 
   4   3 -11    4.75    0.51 
   4   3  11    3.49    0.48 
  -4   3 -11    4.32    0.53 
   4  -3 -11    5.27    0.57 
  -4  -3  11    3.89    0.49 
  -4  -3  11    5.52    0.55 
  -5   3  11   16.24    0.93 
   5  -3  11   15.64    0.85 
   5  -3  11   16.36    0.84 
   5   3 -11   16.77    0.93 
  -5  -3 -11   17.09    0.98 
   5   3 -11   17.12    0.87 
  -5  -3 -11   16.74    0.84 
  -5   3  11   17.91    0.96 
   5  -3 -11   16.16    0.93 
   5   3  11   16.84    0.95 
  -5  -3  11   16.05    0.92 
  -5   3 -11   16.58    0.99 
  -6   3  11    1.63    0.43 
  -6  -3 -11    2.59    0.53 
   6   3 -11    2.60    0.50 
   6   3 -11    1.95    0.45 
   6  -3  11    2.37    0.45 
   6  -3  11    1.84    0.39 
  -6   3  11    1.59    0.44 
   6   3  11    2.49    0.51 
  -6  -3  11    1.88    0.45 
  -6   3 -11    1.88    0.49 
   6  -3 -11    1.17    0.41 
  -7  -3 -11    1.86    0.51 
   7   3 -11    2.95    0.54 
   7  -3  11    3.11    0.51 
  -7   3  11    3.55    0.62 
  -7   3  11    2.83    0.54 
   7  -3  11    2.76    0.52 
   7  -3 -11    3.25    0.63 
   7   3  11    2.77    0.55 
  -7  -3  11    2.58    0.56 
  -7   3 -11    3.17    0.63 
  -8   3  11    0.05    0.39 
   8   3 -11    0.33    0.34 
  -8  -3 -11    0.54    0.40 
  -8   3  11    0.61    0.38 
  -8   3 -11    0.48    0.43 
   8   3  11    0.15    0.33 
  -8  -3  11   -0.03    0.35 
   8  -3 -11    0.05    0.37 
  -9   3  11    2.87    0.64 
  -9  -3 -11    2.02    0.63 
   9   3  11    3.17    0.75 
  -9   3 -11    3.84    0.76 
   0  -4 -11    0.53    0.26 
   0   4  11    0.48    0.22 
   0  -4  11    0.73    0.27 
   0  -4 -11    0.64    0.19 
   0   4  11    0.70    0.22 
   0   4 -11    0.40    0.20 
   0   4 -11    0.62    0.23 
  -1   4  11   21.50    0.74 
  -1   4  11   22.27    0.97 
   1   4 -11   21.16    0.77 
   1  -4  11   20.20    0.90 
  -1  -4 -11   21.71    0.98 
   1   4 -11   21.54    0.92 
   1  -4  11   21.06    0.90 
  -1   4 -11   20.53    0.89 
   1  -4 -11   21.74    0.78 
   1   4  11   21.32    0.87 
   1  -4 -11   21.60    0.95 
  -1  -4  11   21.08    0.91 
  -1  -4  11   21.14    0.74 
   1   4  11   19.34    0.87 
   2  -4  11   34.88    1.24 
  -2  -4 -11   35.88    1.32 
  -2   4  11   34.25    1.29 
   2  -4  11   35.58    1.23 
   2   4 -11   35.72    1.26 
   2  -4 -11   35.12    1.28 
   2   4  11   36.00    1.22 
  -2   4 -11   37.94    1.31 
   2  -4 -11   36.03    1.18 
   2   4  11   35.52    1.26 
  -2  -4  11   37.59    1.30 
  -2  -4  11   36.42    1.16 
   3   4 -11    1.70    0.37 
  -3   4  11    1.68    0.36 
  -3  -4 -11    1.65    0.40 
   3  -4  11    2.68    0.42 
   3  -4  11    1.61    0.34 
   3   4  11    2.24    0.35 
   3  -4 -11    1.95    0.37 
  -3  -4  11    2.73    0.39 
   3   4  11    2.84    0.47 
  -3   4 -11    2.17    0.44 
  -3  -4  11    1.92    0.38 
   3  -4 -11    1.88    0.37 
   4  -4  11   27.65    1.14 
  -4   4  11   29.75    1.27 
   4   4 -11   28.11    1.16 
   4  -4  11   29.14    1.17 
  -4  -4 -11   27.85    1.26 
  -4   4 -11   30.01    1.29 
   4  -4 -11   29.79    1.20 
   4   4  11   27.01    1.22 
  -4  -4  11   31.37    1.21 
  -4  -4  11   28.66    1.21 
   4   4  11   29.26    1.09 
   4  -4 -11   27.74    1.19 
   5   4 -11    1.38    0.39 
  -5  -4 -11    1.42    0.45 
   5  -4  11    0.73    0.32 
  -5   4  11    0.81    0.37 
  -5   4  11    1.22    0.38 
   5  -4  11    1.71    0.38 
  -5  -4  11    0.99    0.36 
  -5  -4  11    1.54    0.39 
   5  -4 -11    1.89    0.44 
  -5   4 -11    1.93    0.47 
   5   4  11    1.28    0.41 
   6   4 -11   34.46    1.47 
  -6   4  11   32.90    1.43 
  -6   4  11   32.01    1.47 
   6  -4  11   34.84    1.37 
  -6  -4 -11   35.60    1.57 
   6   4 -11   37.48    1.47 
   6  -4  11   36.66    1.44 
  -6   4 -11   33.62    1.53 
  -6  -4  11   32.75    1.46 
   6  -4 -11   34.18    1.49 
   6   4  11   32.81    1.49 
   7   4 -11    1.26    0.42 
   7  -4  11    0.93    0.39 
  -7   4  11    0.22    0.35 
  -7   4  11    0.47    0.37 
  -7  -4 -11    0.86    0.45 
   7   4  11    0.72    0.42 
  -7   4 -11    0.79    0.42 
  -7  -4  11    0.36    0.34 
   7  -4 -11    1.14    0.48 
   8   4 -11    4.82    0.72 
   8  -4  11    5.40    0.76 
  -8  -4 -11    5.25    0.83 
  -8   4  11    6.50    0.80 
  -8   4  11    5.84    0.79 
  -8   4 -11    3.59    0.74 
   8   4  11    5.74    0.85 
   8  -4 -11    4.70    0.80 
  -8  -4  11    6.84    0.83 
   0   5 -11   30.41    1.20 
   0   5 -11   30.39    1.09 
   0   5  11   29.93    1.18 
   0  -5 -11   32.45    1.27 
   0   5  11   32.08    1.09 
   0  -5  11   32.73    1.22 
  -1   5  11   11.29    0.75 
   1  -5  11   12.45    0.74 
  -1   5  11   11.49    0.64 
  -1  -5 -11   10.71    0.77 
   1   5 -11   11.31    0.73 
  -1   5 -11   11.94    0.71 
   1  -5 -11   11.79    0.64 
   1   5  11   11.80    0.69 
  -1   5 -11   11.51    0.72 
   1  -5 -11   11.62    0.76 
  -1  -5  11   11.07    0.72 
   1   5  11   11.34    0.71 
   2   5 -11   36.51    1.37 
  -2  -5 -11   33.63    1.36 
  -2   5  11   37.59    1.42 
   2  -5  11   36.78    1.33 
   2  -5  11   33.86    1.30 
   2  -5 -11   36.44    1.23 
  -2  -5  11   40.52    1.23 
   2  -5 -11   34.73    1.32 
  -2   5 -11   36.17    1.34 
   2   5  11   37.71    1.30 
   2   5  11   33.02    1.29 
  -2  -5  11   33.83    1.32 
  -3  -5 -11   10.62    0.81 
  -3   5  11    9.89    0.75 
   3   5 -11    9.77    0.74 
   3  -5  11    9.91    0.71 
   3  -5  11   11.26    0.74 
   3  -5 -11   11.28    0.77 
   3  -5 -11   10.71    0.73 
   3   5  11   10.88    0.67 
   3   5  11   10.89    0.79 
  -3   5 -11    9.48    0.77 
  -3  -5  11   10.77    0.75 
  -3  -5  11   10.30    0.67 
  -4  -5 -11    5.93    0.69 
  -4   5  11    4.03    0.62 
   4   5 -11    5.09    0.60 
   4  -5  11    4.60    0.59 
   4  -5  11    6.96    0.61 
   4  -5 -11    4.54    0.59 
   4  -5 -11    5.21    0.60 
  -4   5 -11    6.35    0.71 
   4   5  11    5.60    0.64 
  -4  -5  11    5.37    0.58 
  -4  -5  11    5.76    0.59 
   5   5 -11    9.54    0.81 
  -5   5  11   11.30    0.90 
   5  -5  11   11.47    0.76 
  -5  -5 -11   10.44    0.91 
   5  -5  11    9.91    0.78 
   5   5  11   10.25    0.85 
  -5   5 -11   10.81    0.91 
   5  -5 -11   12.21    0.84 
   5  -5 -11   11.10    0.83 
  -5  -5  11   10.48    0.82 
  -5  -5  11   11.00    0.82 
  -6   5  11    3.79    0.63 
   6   5 -11    3.79    0.61 
  -6  -5 -11    3.41    0.66 
   6  -5  11    4.12    0.63 
  -6   5 -11    3.40    0.63 
   6  -5 -11    3.30    0.56 
   6   5  11    2.52    0.54 
  -6  -5  11    2.45    0.55 
   6  -5 -11    4.14    0.64 
  -6  -5  11    3.51    0.61 
   7   5 -11    4.26    0.67 
  -7   5  11    4.83    0.70 
   7   5 -11    3.50    0.66 
  -7   5  11    4.35    0.72 
  -7  -5 -11    4.43    0.75 
   7  -5  11    6.55    0.75 
   7  -5 -11    4.39    0.71 
   7   5  11    5.36    0.77 
  -7   5 -11    4.75    0.79 
  -7  -5  11    3.36    0.62 
   8  -5  11    8.76    0.95 
  -8   5  11    7.31    0.94 
   8   5 -11    9.11    1.04 
  -8  -5  11    9.60    1.57 
   0   6  11    7.52    0.65 
   0  -6  11    8.07    0.65 
   0   6 -11    7.10    0.65 
   0  -6 -11    8.04    0.74 
   0   6  11    7.06    0.58 
   1   6 -11   34.04    1.39 
  -1   6  11   37.52    1.43 
   1  -6  11   37.44    1.42 
  -1  -6 -11   35.17    1.45 
  -1   6 -11   37.49    1.35 
   1   6  11   35.38    1.34 
   1  -6 -11   37.28    1.42 
  -1  -6  11   37.56    1.43 
   1   6  11   37.12    1.36 
  -1   6 -11   32.58    1.33 
   2   6 -11    6.58    0.66 
   2  -6  11    6.08    0.62 
  -2  -6 -11    5.59    0.69 
  -2   6  11    4.85    0.60 
  -2   6 -11    5.83    0.57 
   2   6  11    5.47    0.53 
  -2   6 -11    5.34    0.61 
  -2  -6  11    6.68    0.63 
   2  -6 -11    4.85    0.61 
   2   6  11    5.82    0.60 
   2  -6 -11    5.97    0.54 
  -3  -6 -11   36.87    1.56 
   3   6 -11   38.26    1.52 
   3  -6  11   37.76    1.48 
   3  -6  11   36.42    1.41 
  -3   6  11   37.26    1.54 
  -3  -6  11   36.94    1.48 
   3  -6 -11   35.66    1.44 
   3  -6 -11   39.29    1.44 
   3   6  11   38.24    1.51 
  -3   6 -11   37.92    1.52 
   4  -6  11   18.63    1.06 
   4   6 -11   19.45    1.10 
  -4  -6 -11   19.59    1.16 
  -4   6  11   19.07    1.13 
   4  -6  11   21.53    1.06 
  -4   6 -11   18.57    1.13 
   4  -6 -11   19.12    1.05 
  -4  -6  11   18.76    1.07 
   4   6  11   17.93    1.09 
  -4  -6  11   19.77    1.03 
   4  -6 -11   19.17    1.04 
   5  -6  11   21.83    1.10 
   5  -6  11   21.85    1.19 
   5   6 -11   21.93    1.21 
  -5  -6 -11   19.40    1.24 
  -5   6  11   21.19    1.26 
   5  -6 -11   21.58    1.16 
   5  -6 -11   21.09    1.14 
  -5  -6  11   21.47    1.15 
  -5   6 -11   22.86    1.30 
  -5  -6  11   21.14    1.18 
   5   6  11   21.43    1.23 
  -6   6  11    0.79    0.46 
   6  -6  11    1.50    0.46 
  -6  -6 -11    1.40    0.51 
   6   6 -11    1.29    0.47 
   6   6  11    1.07    0.44 
  -6  -6  11    1.80    0.50 
  -6  -6  11    1.15    0.42 
   6  -6 -11    0.87    0.38 
   6  -6 -11    1.74    0.50 
  -6   6 -11    1.31    0.53 
  -7  -6 -11    4.00    0.79 
   7  -6  11    3.96    0.73 
   7   6 -11    4.24    0.74 
  -7   6  11    4.53    0.79 
   7   6 -11    4.51    0.73 
   7  -6 -11    4.11    0.76 
   7   6  11    2.73    0.66 
  -7   6 -11    3.99    0.76 
  -7  -6  11    3.66    0.69 
   0   7  11   18.92    1.03 
   0   7 -11   17.78    1.02 
   0  -7  11   17.71    1.05 
   0  -7 -11   18.02    1.06 
  -1  -7 -11    8.47    0.79 
   1   7 -11    8.08    0.74 
  -1   7  11    8.02    0.73 
   1  -7  11    8.53    0.74 
  -1   7 -11    7.46    0.75 
  -1  -7  11    8.06    0.74 
   1   7  11    7.78    0.67 
   1  -7 -11    8.16    0.77 
   1   7  11    7.96    0.71 
  -1   7 -11    9.75    0.77 
  -2   7  11   16.67    1.07 
   2  -7  11   17.17    1.03 
  -2  -7 -11   15.52    1.04 
   2   7 -11   17.21    1.06 
  -2   7 -11   16.68    0.99 
  -2  -7  11   16.82    1.02 
   2  -7 -11   17.04    1.01 
   2   7  11   17.96    1.03 
  -2   7 -11   17.07    1.03 
  -3  -7 -11    0.50    0.36 
  -3   7  11    0.82    0.39 
   3   7 -11    0.42    0.36 
   3  -7  11   -0.06    0.24 
  -3   7 -11    0.06    0.26 
  -3   7 -11    0.38    0.35 
   3  -7 -11    0.21    0.28 
   3  -7 -11    0.64    0.34 
  -3  -7  11    0.21    0.29 
   3   7  11    0.29    0.31 
   4   7 -11    5.44    0.75 
  -4   7  11    4.21    0.69 
   4  -7  11    4.06    0.65 
  -4  -7 -11    4.10    0.69 
  -4   7 -11    4.48    0.61 
   4  -7 -11    5.42    0.70 
  -4  -7  11    4.87    0.68 
   4  -7 -11    4.38    0.64 
   4   7  11    3.95    0.65 
  -4   7 -11    4.42    0.68 
   5  -7  11    0.14    0.35 
   5   7 -11    0.78    0.43 
  -5   7  11   -0.05    0.32 
  -5  -7 -11    0.49    0.42 
  -5  -7  11    0.98    0.42 
   5  -7 -11    0.65    0.40 
   5   7  11    1.01    0.45 
  -5   7 -11    0.59    0.41 
   6   7 -11    3.82    0.73 
   6  -7  11    3.12    0.62 
  -6   7  11    3.11    0.65 
  -6  -7 -11    4.42    0.79 
   6  -7 -11    3.73    0.69 
   6   7  11    3.28    0.67 
  -6  -7  11    2.52    0.57 
  -6   7 -11    2.31    0.65 
  -6  -7  11    2.56    0.58 
   0   8  11    0.01    0.29 
   0   8 -11    0.12    0.30 
   0  -8 -11   -0.08    0.31 
   0  -8  11    0.00    0.34 
  -1  -8 -11    4.71    0.70 
  -1   8  11    4.61    0.68 
   1   8 -11    2.89    0.56 
   1  -8  11    3.82    0.62 
  -1   8 -11    3.93    0.64 
  -1  -8  11    2.74    0.56 
   1  -8 -11    3.54    0.61 
   1   8  11    4.18    0.78 
  -2   8  11    2.95    0.56 
   2   8 -11    2.49    0.54 
  -2  -8 -11    2.46    0.61 
   2  -8  11    2.44    0.52 
  -2   8 -11    2.48    0.53 
  -2  -8  11    2.47    0.53 
  -2   8 -11    3.90    0.78 
   2   8  11    3.07    0.60 
   2  -8 -11    4.24    0.64 
  -3   8  11    2.46    0.62 
   3   8 -11    2.77    0.59 
   3  -8  11    2.28    0.52 
  -3  -8 -11    2.39    0.58 
   3  -8 -11    2.76    0.64 
  -3  -8  11    2.78    0.57 
  -3   8 -11    2.58    0.56 
   3   8  11    2.28    0.56 
  -3   8 -11    2.86    0.56 
   4   8 -11   16.71    1.19 
   4  -8  11   15.53    1.14 
  -4  -8 -11   18.39    1.28 
  -4   8  11   18.00    1.26 
   4  -8 -11   14.16    1.01 
   4   8  11   15.82    1.15 
  -4   8 -11   17.69    1.22 
  -4   8 -11   16.47    1.07 
  -4  -8  11   15.92    1.11 
  -5  -8 -11    1.60    0.69 
   5   8 -11    2.60    0.72 
   5  -8  11    2.09    0.58 
   5  -8 -11    1.96    0.56 
  -5  -8  11    1.18    0.47 
   5   8  11    2.90    0.65 
  -5   8 -11    2.41    0.62 
   0  -9 -11    2.03    0.57 
   0   9 -11    0.74    0.42 
   0  -9  11    1.04    0.47 
   1   9 -11    3.35    0.68 
   1  -9  11    3.29    0.65 
  -1   9  11    2.93    0.63 
  -1  -9 -11    2.72    0.62 
  -1  -9  11    4.44    0.76 
   1  -9 -11    2.49    0.59 
  -1   9 -11    3.94    0.68 
  -2  -9 -11    5.93    0.83 
  -2   9  11    6.42    0.86 
   2  -9  11    5.92    0.85 
   2   9 -11    5.48    0.80 
  -2   9 -11    5.32    0.77 
  -2  -9  11    5.83    0.81 
   2   9  11    6.01    0.82 
  -3  -9 -11    3.06    0.70 
  -3   9  11    2.28    0.65 
  -3   9 -11    1.71    0.51 
  -3  -9  11    2.49    0.59 
   3   9  11    2.80    0.66 
  -4   9 -11    5.26    0.89 
   0   0  12  180.94    3.74 
   0   0  12  176.33    3.80 
   0   0  12  182.47    3.58 
   0   0 -12  175.25    3.72 
   1   0  12   30.57    0.98 
  -1   0  12   30.20    0.98 
   1   0  12   29.31    1.01 
  -1   0  12   31.28    0.90 
  -1   0  12   30.87    0.91 
   1   0  12   30.78    0.78 
  -1   0  12   31.93    1.00 
  -1   0 -12   30.18    0.93 
   2   0 -12   36.52    1.09 
  -2   0  12   36.25    1.11 
  -2   0 -12   37.21    1.08 
  -2   0 -12   36.27    1.18 
  -2   0  12   37.07    1.00 
   2   0  12   35.17    1.15 
   2   0  12   38.72    0.90 
  -2   0  12   36.67    1.17 
   3   0  12  193.31    3.71 
  -3   0  12  188.85    3.97 
   3   0  12  181.96    4.07 
   3   0 -12  187.38    4.03 
  -3   0 -12  186.88    3.93 
  -3   0 -12  176.83    4.07 
   3   0 -12  193.42    3.78 
  -3   0  12  182.07    4.10 
  -4   0  12   21.82    0.98 
   4   0 -12   20.66    0.94 
   4   0  12   21.76    0.73 
  -4   0 -12   22.14    0.97 
  -4   0 -12   22.79    0.90 
   4   0  12   22.75    0.98 
  -4   0  12   23.36    0.88 
  -5   0  12    7.60    0.67 
  -5   0  12    6.76    0.51 
   5   0 -12    6.36    0.62 
  -5   0 -12    6.02    0.60 
  -5   0 -12    5.57    0.54 
   5   0  12    5.68    0.56 
   6   0  12    6.02    0.62 
  -6   0 -12    6.79    0.59 
  -6   0 -12    4.56    0.60 
   6   0 -12    5.38    0.62 
  -6   0  12    6.19    0.66 
  -7   0 -12   58.52    2.00 
   7   0 -12   58.29    2.07 
  -7   0  12   58.64    2.09 
   7   0  12   58.29    1.99 
  -8   0  12   14.34    1.08 
  -8   0 -12   15.05    1.01 
   8   0 -12   16.04    1.10 
   8   0  12   14.91    1.00 
   9   0  12    2.27    0.55 
  -9   0  12    2.92    0.65 
   9   0 -12    3.13    0.71 
   0   1  12    8.11    0.49 
   0  -1  12    9.22    0.44 
   0  -1  12    9.14    0.49 
   0  -1 -12    8.97    0.35 
   0  -1  12    8.86    0.50 
   0  -1 -12    8.23    0.49 
   0   1  12    8.35    0.44 
   0   1 -12    8.49    0.43 
   1  -1  12    5.63    0.42 
   1  -1  12    5.51    0.33 
  -1  -1 -12    5.72    0.21 
  -1  -1 -12    6.24    0.44 
  -1   1  12    6.10    0.35 
  -1   1  12    4.47    0.41 
  -1  -1  12    5.38    0.37 
   1  -1 -12    5.35    0.42 
  -1  -1  12    4.81    0.37 
  -1  -1  12    5.01    0.37 
   1  -1 -12    5.21    0.33 
   1   1  12    5.53    0.41 
  -1   1 -12    5.42    0.34 
   1   1  12    4.76    0.38 
  -1  -1  12    4.87    0.36 
  -2   1  12   54.75    1.25 
   2   1 -12   54.79    1.40 
  -2  -1 -12   52.95    1.47 
   2  -1  12   55.31    1.32 
  -2   1  12   53.03    1.53 
  -2   1  12   51.96    1.49 
   2  -1  12   50.73    1.48 
  -2  -1  12   54.63    1.51 
  -2  -1  12   54.59    1.42 
  -2   1 -12   55.15    1.56 
  -2  -1  12   55.44    1.50 
   2   1  12   53.32    1.56 
  -2   1 -12   55.51    1.34 
   2  -1 -12   55.33    1.44 
  -3   1  12    8.70    0.59 
  -3  -1 -12    8.76    0.57 
   3   1 -12    8.23    0.47 
  -3  -1 -12    9.52    0.59 
   3   1 -12    8.47    0.56 
   3  -1  12    8.60    0.57 
  -3   1  12    9.58    0.57 
   3  -1  12    8.46    0.44 
   3   1  12    7.41    0.54 
  -3  -1  12    8.02    0.57 
  -3   1 -12    8.33    0.46 
  -3  -1  12    8.11    0.46 
  -3   1 -12    8.75    0.60 
   3  -1 -12    7.49    0.54 
   4  -1  12   30.21    0.95 
  -4   1  12   29.17    1.17 
   4  -1  12   29.48    1.13 
   4   1 -12   28.78    1.11 
  -4   1  12   29.38    1.07 
  -4  -1 -12   27.53    1.09 
   4   1 -12   28.36    0.94 
  -4  -1 -12   28.78    1.08 
   4   1  12   26.48    1.11 
   4  -1 -12   28.47    1.11 
  -4  -1  12   28.88    1.14 
  -4   1 -12   28.22    1.15 
  -4   1 -12   28.70    0.95 
  -4  -1  12   29.72    0.94 
  -5  -1 -12   72.77    2.06 
   5   1 -12   72.77    2.12 
   5  -1  12   74.04    1.88 
  -5  -1 -12   75.30    2.10 
   5  -1  12   70.22    2.09 
  -5   1  12   71.49    2.15 
  -5   1  12   73.84    2.03 
   5  -1 -12   69.26    2.08 
  -5   1 -12   71.01    2.11 
   5   1  12   70.17    2.09 
  -5  -1  12   69.45    2.11 
   6  -1  12   30.72    1.29 
   6   1 -12   29.37    1.30 
  -6   1  12   29.47    1.32 
  -6  -1 -12   31.83    1.28 
  -6   1  12   32.51    1.23 
  -6  -1 -12   30.74    1.26 
   6  -1 -12   30.90    1.35 
  -6   1 -12   31.71    1.36 
   6   1  12   35.44    1.40 
  -6  -1  12   31.18    1.37 
  -7  -1 -12    0.86    0.36 
  -7   1  12    1.19    0.40 
   7   1 -12    1.53    0.45 
   7  -1  12    1.59    0.44 
  -7  -1 -12    0.93    0.40 
  -7  -1  12    1.61    0.46 
   7  -1 -12    1.29    0.42 
  -7   1 -12    1.07    0.42 
   7   1  12    1.35    0.42 
   8  -1  12   10.73    0.86 
   8   1 -12   10.53    0.95 
  -8   1  12    9.62    0.92 
   8  -1 -12   10.99    0.96 
   8   1  12   11.44    0.92 
  -8  -1  12   10.85    0.98 
  -8   1 -12   11.10    0.94 
   9   1 -12    0.18    0.46 
  -9   1  12   -0.01    0.33 
   9  -1 -12    0.01    0.46 
  -9  -1  12   -0.19    0.43 
  -9   1 -12    0.11    0.47 
   9   1  12   -0.27    0.37 
   0  -2  12    2.61    0.34 
   0  -2  12    2.08    0.28 
   0   2  12    2.37    0.29 
   0  -2 -12    2.39    0.22 
   0   2  12    2.40    0.36 
   0  -2  12    2.22    0.24 
   0  -2 -12    2.53    0.35 
   0   2 -12    2.33    0.30 
   1  -2  12   33.55    1.10 
  -1   2  12   33.58    0.92 
  -1  -2 -12   34.52    1.13 
   1   2 -12   32.93    1.00 
  -1   2  12   32.35    1.11 
   1  -2  12   32.82    1.01 
   1   2  12   33.62    1.06 
  -1   2 -12   34.72    0.87 
  -1  -2  12   32.56    1.06 
  -1  -2  12   35.06    1.02 
  -1  -2  12   34.31    1.08 
   1  -2 -12   32.94    0.93 
  -1   2 -12   33.88    1.11 
   1   2  12   33.14    1.13 
  -2   2  12   23.56    0.95 
  -2  -2 -12   23.63    0.93 
   2   2 -12   23.26    0.85 
   2  -2  12   22.25    0.80 
  -2   2  12   23.84    0.95 
  -2   2  12   24.59    0.65 
   2  -2  12   21.08    0.88 
   2  -2 -12   23.40    0.84 
  -2  -2  12   23.95    0.89 
   2   2  12   24.15    0.93 
  -2   2 -12   24.15    0.96 
  -2   2 -12   25.52    0.68 
   2  -2 -12   23.65    0.95 
  -2  -2  12   24.60    0.80 
  -2  -2  12   25.31    0.94 
  -3  -2 -12   14.49    0.78 
  -3   2  12   14.63    0.74 
   3  -2  12   14.14    0.73 
   3   2 -12   12.99    0.64 
   3  -2  12   14.21    0.64 
  -3   2  12   13.70    0.76 
   3   2  12   13.77    0.72 
  -3  -2  12   13.92    0.56 
   3  -2 -12   13.69    0.70 
  -3  -2  12   14.33    0.73 
  -3  -2  12   14.21    0.74 
  -3   2 -12   13.88    0.77 
  -4   2  12    4.17    0.48 
  -4  -2 -12    4.22    0.54 
   4  -2  12    3.47    0.40 
   4   2 -12    3.24    0.46 
   4   2 -12    3.74    0.42 
   4  -2  12    4.17    0.48 
  -4  -2 -12    3.77    0.44 
  -4   2  12    3.66    0.50 
  -4  -2  12    3.11    0.47 
  -4   2 -12    3.68    0.54 
   4   2  12    3.96    0.46 
   4  -2 -12    3.34    0.46 
  -5   2  12   95.66    2.55 
  -5   2  12   97.77    2.65 
   5  -2  12   96.93    2.56 
   5   2 -12   92.49    2.38 
   5   2 -12   95.68    2.61 
  -5  -2 -12   97.25    2.61 
   5  -2  12   99.29    2.43 
  -5  -2 -12   95.58    2.52 
  -5  -2  12   97.39    2.65 
   5   2  12   98.27    2.63 
   5  -2 -12   97.57    2.60 
  -5   2 -12   90.91    2.61 
   6   2 -12    6.40    0.66 
   6  -2  12    5.65    0.55 
  -6   2  12    6.06    0.67 
  -6   2  12    5.01    0.55 
  -6  -2 -12    4.68    0.56 
  -6  -2 -12    5.22    0.63 
   6  -2  12    5.83    0.58 
  -6   2 -12    6.01    0.68 
   6  -2 -12    4.61    0.64 
   6   2  12    6.42    0.67 
  -6  -2  12    3.79    0.57 
   7  -2  12    6.87    0.69 
  -7   2  12    7.26    0.76 
  -7  -2 -12    7.34    0.77 
   7   2 -12    7.52    0.76 
  -7   2  12    6.94    0.68 
   7  -2 -12    6.66    0.76 
  -7   2 -12    8.47    0.82 
  -7  -2  12    8.36    0.80 
   7   2  12    7.58    0.76 
  -8   2  12    1.98    0.54 
   8  -2  12    1.72    0.45 
   8   2 -12    1.80    0.50 
  -8  -2 -12    2.34    0.55 
  -8  -2  12    0.96    0.47 
  -8   2 -12    1.63    0.54 
   8   2  12    2.52    0.60 
   8  -2 -12    1.77    0.56 
  -9   2  12    0.90    0.53 
  -9   2 -12    1.32    0.53 
   9   2  12    1.44    0.51 
   0  -3 -12    4.10    0.28 
   0  -3  12    4.81    0.30 
   0  -3  12    4.53    0.41 
   0   3 -12    4.00    0.37 
   0   3  12    4.71    0.38 
   0  -3  12    4.18    0.42 
   0   3  12    4.12    0.42 
  -1   3  12   46.96    1.45 
  -1  -3 -12   44.60    1.43 
  -1   3  12   45.01    1.17 
   1   3 -12   42.15    1.34 
   1  -3  12   44.89    1.33 
   1  -3  12   44.90    1.38 
   1   3 -12   45.10    1.24 
   1  -3 -12   45.31    1.42 
   1   3  12   45.04    1.33 
  -1  -3  12   46.03    1.23 
   1   3  12   44.84    1.40 
  -1   3 -12   42.95    1.35 
   1  -3 -12   46.07    1.21 
  -1  -3  12   44.06    1.36 
  -2   3  12    5.26    0.51 
  -2  -3 -12    4.15    0.51 
   2   3 -12    4.12    0.43 
   2  -3  12    5.08    0.44 
   2  -3  12    5.05    0.47 
   2   3 -12    5.11    0.35 
   2   3  12    5.17    0.46 
   2   3  12    5.30    0.49 
   2  -3 -12    5.60    0.51 
  -2  -3  12    5.47    0.49 
   2  -3 -12    5.31    0.46 
  -2   3 -12    5.41    0.49 
  -2  -3  12    5.97    0.46 
   3   3 -12   24.12    0.97 
   3  -3  12   24.19    0.94 
   3  -3  12   22.20    0.96 
  -3   3  12   24.47    1.04 
  -3   3  12   24.69    1.06 
  -3  -3 -12   24.84    1.07 
   3   3  12   22.44    0.99 
  -3  -3  12   24.03    1.01 
  -3  -3  12   24.71    0.97 
  -3   3 -12   24.23    1.04 
   3   3  12   22.44    0.95 
   3  -3 -12   24.48    0.97 
   3  -3 -12   23.19    1.02 
   4   3 -12    4.55    0.48 
  -4   3  12    4.36    0.54 
  -4  -3 -12    3.32    0.50 
   4  -3  12    4.20    0.54 
  -4   3  12    4.31    0.52 
   4  -3  12    3.83    0.44 
  -4  -3 -12    3.70    0.47 
  -4  -3  12    4.05    0.52 
  -4   3 -12    4.18    0.57 
   4  -3 -12    4.77    0.55 
  -4  -3  12    3.61    0.53 
   4   3  12    4.46    0.54 
  -5  -3 -12   38.19    1.33 
   5  -3  12   36.11    1.36 
   5   3 -12   35.12    1.40 
   5   3 -12   36.84    1.32 
   5  -3  12   37.32    1.33 
  -5   3  12   35.38    1.44 
  -5  -3 -12   38.56    1.49 
  -5   3  12   34.46    1.41 
  -5   3 -12   36.54    1.49 
   5   3  12   36.20    1.42 
   5  -3 -12   35.88    1.41 
  -5  -3  12   35.42    1.42 
   6   3 -12   10.70    0.83 
  -6  -3 -12   10.28    0.86 
   6  -3  12   11.73    0.79 
  -6   3  12   12.46    0.86 
  -6   3  12   11.36    0.85 
   6  -3  12   11.76    0.77 
   6  -3 -12   10.96    0.87 
  -6   3 -12   10.42    0.89 
   6   3  12   12.30    0.89 
  -6  -3  12   11.18    0.86 
   7  -3  12    2.65    0.51 
   7   3 -12    3.19    0.58 
   7  -3  12    1.94    0.46 
  -7  -3 -12    2.69    0.60 
  -7   3  12    2.75    0.56 
  -7   3  12    2.62    0.51 
   7  -3 -12    2.55    0.56 
   7   3  12    2.66    0.55 
  -7  -3  12    2.32    0.55 
  -7   3 -12    1.87    0.55 
  -8   3  12    0.97    0.48 
  -8  -3 -12    1.08    0.54 
   8   3 -12    0.70    0.41 
   8  -3 -12    1.23    0.53 
  -8   3 -12    1.41    0.54 
  -8  -3  12    0.92    0.45 
   8   3  12    0.16    0.35 
  -9   3  12    5.35    1.00 
  -9  -3 -12    2.89    0.75 
   0  -4 -12   37.36    1.31 
   0   4  12   35.50    1.12 
   0   4 -12   35.95    1.16 
   0   4 -12   36.47    1.27 
   0  -4  12   36.63    1.24 
   0   4  12   33.08    1.23 
  -1  -4 -12    0.18    0.27 
   1  -4  12    0.38    0.22 
   1  -4  12    0.66    0.24 
  -1   4  12    0.21    0.24 
   1   4 -12    0.48    0.20 
   1   4 -12    0.59    0.25 
  -1   4  12    0.65    0.19 
   1  -4 -12    0.58    0.29 
   1  -4 -12    0.55    0.22 
  -1  -4  12    0.43    0.18 
   1   4  12    0.32    0.22 
   1   4  12    0.25    0.23 
  -1   4 -12   -0.05    0.22 
  -1  -4  12    0.54    0.25 
  -2   4  12   42.02    1.47 
   2  -4  12   43.00    1.39 
   2  -4  12   40.40    1.39 
   2   4 -12   43.21    1.43 
  -2  -4 -12   41.53    1.47 
   2   4  12   43.27    1.41 
   2   4  12   44.27    1.45 
  -2   4 -12   42.28    1.45 
  -2  -4  12   42.79    1.45 
   2  -4 -12   42.71    1.47 
  -2  -4  12   45.20    1.33 
   2  -4 -12   44.36    1.33 
   3  -4  12   26.14    1.09 
  -3  -4 -12   26.73    1.19 
   3  -4  12   28.53    1.10 
   3   4 -12   26.21    1.08 
  -3   4  12   27.18    1.19 
   3  -4 -12   28.34    1.09 
  -3   4 -12   28.16    1.19 
   3   4  12   26.81    1.06 
  -3  -4  12   27.38    1.07 
   3  -4 -12   26.91    1.14 
  -3  -4  12   24.53    1.10 
   3   4  12   25.19    1.10 
   4   4 -12   21.68    1.02 
   4  -4  12   22.44    1.01 
   4  -4  12   21.31    1.01 
  -4   4  12   22.53    1.09 
  -4  -4 -12   20.89    1.09 
  -4  -4  12   22.20    1.03 
  -4   4 -12   22.79    1.11 
   4  -4 -12   20.81    1.04 
  -4  -4  12   22.84    1.06 
   4  -4 -12   20.48    1.04 
   4   4  12   22.64    0.98 
   4   4  12   22.75    1.10 
   5  -4  12    0.13    0.25 
  -5   4  12    0.73    0.35 
   5  -4  12    0.45    0.29 
  -5   4  12    0.09    0.27 
  -5  -4 -12    0.21    0.34 
   5   4 -12    0.73    0.32 
  -5  -4  12    0.18    0.28 
   5  -4 -12    0.07    0.30 
  -5  -4  12    0.34    0.29 
  -5   4 -12    0.09    0.32 
   5   4  12    0.22    0.27 
  -6   4  12   10.14    0.83 
  -6   4  12   10.09    0.82 
  -6  -4 -12   11.42    0.92 
   6  -4  12   10.59    0.81 
   6   4 -12   10.33    0.82 
   6   4 -12   10.23    0.84 
   6  -4  12   11.85    0.80 
   6   4  12   11.14    0.90 
  -6  -4  12   10.79    0.87 
  -6   4 -12   11.21    0.94 
   6  -4 -12    9.74    0.86 
   7  -4  12   10.05    0.82 
  -7   4  12   10.87    0.92 
  -7   4  12   10.74    0.92 
  -7  -4 -12    9.08    0.93 
   7   4 -12    9.16    0.86 
  -7  -4  12    8.92    0.87 
   7  -4 -12   10.51    0.96 
   7   4  12   11.50    0.95 
  -7   4 -12    9.01    0.95 
   8   4 -12    9.13    0.91 
  -8   4  12   10.51    1.00 
  -8  -4 -12    9.32    1.02 
  -8   4  12    9.84    0.97 
   8  -4 -12    9.78    1.02 
  -8   4 -12    9.76    1.02 
  -8  -4  12    9.67    0.97 
   8   4  12    9.06    0.96 
   0   5 -12    0.52    0.25 
   0   5  12    0.63    0.28 
   0   5 -12    0.38    0.25 
   0  -5  12    0.80    0.31 
   0  -5 -12    0.72    0.32 
   0   5  12    0.62    0.24 
   1   5 -12   20.22    0.99 
  -1  -5 -12   20.64    1.04 
  -1   5  12   20.88    1.01 
   1  -5  12   19.68    0.96 
  -1  -5  12   19.43    0.96 
   1  -5 -12   21.60    1.04 
  -1   5 -12   21.13    0.95 
   1   5  12   20.75    0.96 
   1   5  12   20.07    0.92 
  -1   5 -12   22.30    1.01 
   2  -5  12   31.19    1.25 
   2  -5  12   30.23    1.23 
   2   5 -12   32.29    1.28 
  -2  -5 -12   31.89    1.35 
  -2   5  12   34.02    1.35 
   2  -5 -12   31.29    1.27 
  -2  -5  12   34.28    1.13 
  -2  -5  12   31.88    1.28 
   2   5  12   33.03    1.23 
   2   5  12   33.49    1.27 
  -2   5 -12   31.49    1.28 
   2  -5 -12   31.88    1.15 
   3   5 -12    6.61    0.63 
   3  -5  12    6.75    0.61 
  -3  -5 -12    8.41    0.75 
  -3   5  12    6.00    0.61 
   3  -5  12    8.03    0.64 
  -3  -5  12    7.52    0.60 
   3  -5 -12    6.49    0.63 
   3   5  12    8.11    0.60 
   3  -5 -12    7.85    0.64 
   3   5  12    7.54    0.67 
  -3   5 -12    8.14    0.72 
  -3  -5  12    8.25    0.67 
   4   5 -12   57.12    1.87 
   4  -5  12   56.43    1.82 
  -4   5  12   53.24    1.93 
  -4  -5 -12   53.61    1.93 
   4  -5  12   54.51    1.81 
  -4   5 -12   55.04    1.91 
   4  -5 -12   52.39    1.82 
  -4  -5  12   53.95    1.77 
   4  -5 -12   55.44    1.81 
   4   5  12   52.09    1.85 
  -4  -5  12   56.18    1.88 
   5   5 -12    8.54    0.74 
  -5  -5 -12    8.59    0.86 
   5  -5  12    7.44    0.70 
   5  -5  12   10.15    0.75 
  -5   5  12    7.38    0.78 
  -5   5 -12    8.36    0.84 
  -5  -5  12    7.63    0.71 
   5   5  12    9.18    0.82 
  -5  -5  12    9.01    0.79 
   5  -5 -12    8.66    0.77 
   5  -5 -12    9.01    0.75 
   6   5 -12   16.88    1.04 
   6  -5  12   15.03    0.92 
  -6   5  12   13.55    1.04 
   6  -5  12   16.55    1.01 
  -6  -5 -12   16.12    1.12 
   6   5 -12   13.24    0.97 
   6  -5 -12   16.01    1.01 
  -6  -5  12   16.89    1.08 
   6   5  12   15.31    1.07 
  -6   5 -12   15.42    1.09 
   6  -5 -12   16.62    1.06 
  -6  -5  12   14.54    1.02 
  -7   5  12    0.02    0.37 
   7  -5  12   -0.04    0.37 
  -7   5  12    0.74    0.44 
  -7  -5 -12    0.57    0.46 
   7   5 -12    0.23    0.33 
  -7   5 -12   -0.38    0.32 
  -7  -5  12    0.53    0.39 
   7  -5 -12    0.06    0.37 
   7   5  12    0.77    0.43 
  -8   5  12   10.55    1.06 
   8  -5  12   10.15    0.96 
   0  -6 -12    0.26    0.30 
   0  -6  12    0.32    0.26 
   0   6 -12   -0.07    0.22 
   0   6  12   -0.05    0.24 
   0   6  12    0.02    0.22 
  -1  -6 -12    5.66    0.68 
   1  -6  12    5.60    0.59 
  -1   6  12    5.42    0.63 
   1   6 -12    6.42    0.65 
  -1   6 -12    5.95    0.60 
  -1  -6  12    5.58    0.58 
   1   6  12    5.48    0.57 
   1   6  12    5.95    0.57 
  -1   6 -12    5.30    0.57 
   1  -6 -12    6.78    0.65 
  -2   6  12    0.36    0.30 
   2  -6  12    0.36    0.30 
   2   6 -12    0.85    0.32 
  -2  -6 -12    0.12    0.30 
  -2   6 -12    0.88    0.33 
   2   6  12    0.74    0.30 
   2  -6 -12    1.00    0.50 
   2   6  12    0.38    0.31 
  -2  -6  12    0.31    0.31 
   2  -6 -12    0.76    0.33 
  -2   6 -12    0.76    0.36 
   3  -6  12    8.60    0.74 
   3  -6  12    7.95    0.69 
  -3   6  12    7.74    0.72 
   3   6 -12    8.26    0.75 
  -3  -6 -12    8.43    0.80 
   3  -6 -12    7.61    0.68 
   3   6  12    6.33    0.70 
  -3   6 -12    8.29    0.77 
   3  -6 -12    9.01    0.75 
  -3  -6  12    7.64    0.70 
  -4  -6 -12    6.90    0.79 
   4  -6  12    6.26    0.62 
  -4   6  12    5.59    0.67 
   4  -6  12    6.15    0.69 
   4   6 -12    5.31    0.66 
  -4  -6  12    5.30    0.61 
   4   6  12    6.57    0.72 
   4  -6 -12    6.14    0.64 
   4  -6 -12    5.60    0.64 
  -4  -6  12    5.60    0.68 
  -4   6 -12    6.12    0.75 
  -5  -6 -12   22.60    1.34 
   5  -6  12   26.43    1.23 
  -5   6  12   22.94    1.32 
   5  -6  12   22.31    1.23 
   5   6 -12   23.97    1.30 
  -5  -6  12   22.77    1.19 
   5  -6 -12   21.24    1.17 
   5   6  12   20.46    1.23 
  -5  -6  12   24.08    1.26 
  -5   6 -12   25.78    1.38 
   5  -6 -12   21.94    1.18 
   6  -6  12   -0.07    0.33 
  -6  -6 -12    0.27    0.42 
   6   6 -12    0.05    0.36 
  -6   6  12    0.64    0.41 
  -6   6 -12   -0.20    0.35 
  -6  -6  12    0.32    0.35 
   6  -6 -12    0.70    0.45 
  -6  -6  12   -0.34    0.28 
   6  -6 -12    0.05    0.29 
   6   6  12   -0.24    0.36 
   7   6 -12    8.68    0.96 
   7  -6  12    7.97    0.86 
   7   6 -12    8.63    0.92 
  -7   6  12    7.44    0.93 
   7  -6 -12    6.11    0.83 
  -7  -6  12    6.75    0.85 
   0   7  12    1.26    0.40 
   0  -7 -12    1.31    0.42 
   0   7 -12    1.37    0.39 
   0  -7  12    1.61    0.42 
   1  -7  12    5.89    0.65 
   1   7 -12    4.89    0.67 
  -1  -7 -12    4.31    0.64 
  -1   7  12    5.17    0.64 
   1   7  12    5.08    0.59 
   1  -7 -12    4.26    0.62 
  -1   7 -12    4.84    0.64 
  -1  -7  12    5.44    0.72 
   1   7  12    4.53    0.59 
   2  -7  12    2.88    0.53 
  -2  -7 -12    5.21    0.70 
   2   7 -12    5.30    0.72 
  -2   7  12    5.41    0.72 
  -2   7 -12    3.88    0.59 
   2   7  12    4.46    0.60 
  -2   7 -12    5.22    0.67 
  -2  -7  12    3.77    0.58 
   2  -7 -12    5.15    0.68 
  -3  -7 -12    6.83    0.81 
   3   7 -12    8.28    0.81 
   3  -7  12    7.96    0.76 
  -3   7  12    7.39    0.81 
  -3  -7  12    8.20    0.79 
  -3   7 -12    8.23    0.74 
   3   7  12    7.06    0.76 
  -3   7 -12    9.48    0.85 
   3  -7 -12    8.32    0.80 
  -4  -7 -12   13.97    1.08 
  -4   7  12   13.50    1.02 
   4   7 -12   13.78    1.03 
   4  -7  12   12.40    0.94 
  -4  -7  12   13.16    0.97 
   4   7  12   12.37    1.00 
   4  -7 -12   11.98    0.91 
  -4   7 -12   14.21    1.06 
  -4   7 -12   14.17    0.94 
   4  -7 -12   14.62    1.00 
  -5   7  12    0.20    0.40 
  -5  -7 -12    0.80    0.46 
   5  -7  12    0.44    0.37 
   5   7 -12    0.58    0.42 
  -5   7 -12    0.83    0.33 
  -5  -7  12    0.43    0.35 
   5  -7 -12    0.29    0.39 
  -5   7 -12    0.39    0.42 
   5  -7 -12    0.98    0.38 
   5   7  12    0.47    0.41 
   6  -7  12    6.26    0.84 
  -6   7  12    5.52    0.93 
   6   7 -12    5.28    0.83 
  -6  -7 -12    6.83    1.41 
  -6   7 -12    8.11    0.99 
  -6  -7  12    6.81    0.83 
   6  -7 -12    8.48    0.92 
  -6  -7  12    7.68    0.87 
   6   7  12    5.43    0.91 
   0  -8 -12   12.40    0.98 
   0   8  12    9.39    0.85 
   0   8 -12   10.31    0.88 
   0  -8  12   11.37    0.94 
  -1  -8 -12    2.38    0.56 
   1   8 -12    2.20    0.51 
  -1   8  12    1.86    0.51 
   1  -8  12    1.52    0.47 
  -1  -8  12    1.59    0.49 
  -1   8 -12    1.28    0.44 
   1  -8 -12    1.85    0.48 
  -2   8  12   13.41    1.03 
  -2  -8 -12   12.71    1.06 
   2   8 -12   16.71    1.11 
   2  -8  12   12.77    0.98 
  -2   8 -12   13.18    0.95 
  -2  -8  12   13.36    1.00 
   2  -8 -12   15.56    1.02 
   2   8  12   12.70    0.94 
   3  -8  12    9.79    0.92 
  -3  -8 -12    8.97    0.94 
   3   8 -12    9.63    0.93 
  -3   8  12    8.27    0.91 
  -3   8 -12    7.74    0.76 
   3  -8 -12    8.13    0.82 
   3   8  12    7.30    0.82 
  -3  -8  12    7.19    0.80 
  -3   8 -12    6.98    0.82 
  -4   8  12    1.03    0.49 
   4  -8  12    0.25    0.37 
   4   8 -12    0.72    0.41 
  -4  -8 -12    1.31    0.56 
  -4   8 -12    1.14    0.50 
   4   8  12    0.13    0.42 
  -4  -8  12    0.90    0.45 
  -4   8 -12    0.68    0.38 
  -5   8 -12    2.99    0.83 
   5  -8 -12    1.97    0.57 
   0  -9  12   15.62    1.18 
   0   9 -12   16.92    1.16 
   0  -9 -12   15.46    1.13 
   1   9 -12   12.26    1.03 
   1  -9  12   11.18    1.00 
  -1   9  12   12.63    1.04 
  -1  -9 -12   13.32    1.13 
  -1   9 -12   12.37    1.01 
  -1  -9  12   13.74    1.10 
   1  -9 -12   14.19    1.07 
   2   9 -12    3.79    0.68 
  -2   9  12    3.87    0.70 
  -2  -9 -12    6.01    0.87 
   2  -9  12    4.60    0.76 
  -2  -9  12    4.34    0.76 
  -2   9 -12    5.08    0.75 
  -3   9  12    9.38    1.18 
  -3  -9 -12   10.58    1.03 
   3   9  12   11.90    1.05 
  -3   9 -12   12.22    1.03 
   0   0  13    0.48    0.20 
   0   0 -13    0.29    0.16 
  -1   0  13   30.42    1.02 
  -1   0  13   30.51    0.92 
   1   0  13   31.67    1.08 
   1   0  13   29.46    1.00 
  -1   0 -13   31.11    0.96 
   1   0  13   31.88    0.80 
  -1   0  13   29.05    1.00 
  -1   0  13   31.19    0.94 
  -2   0 -13    0.59    0.21 
   2   0 -13    0.59    0.19 
   2   0  13    0.53    0.22 
  -2   0 -13    0.26    0.20 
   2   0  13    0.48    0.12 
  -2   0  13    0.57    0.17 
  -2   0  13    0.40    0.22 
  -2   0  13    0.41    0.19 
   3   0  13    5.94    0.32 
   3   0 -13    5.45    0.35 
  -3   0 -13    5.73    0.49 
   3   0 -13    5.95    0.48 
  -3   0  13    6.00    0.51 
  -3   0  13    5.52    0.44 
   3   0  13    4.62    0.48 
  -3   0 -13    6.01    0.48 
  -4   0 -13    0.08    0.21 
  -4   0  13    0.12    0.22 
   4   0  13    0.55    0.27 
  -4   0 -13    0.70    0.27 
  -4   0  13    0.63    0.22 
   4   0 -13    0.37    0.26 
  -5   0  13   30.78    1.11 
  -5   0  13   30.27    1.29 
  -5   0 -13   32.38    1.18 
   5   0 -13   29.15    1.24 
  -5   0 -13   32.32    1.28 
   5   0  13   31.26    1.27 
  -6   0  13    1.42    0.38 
  -6   0 -13    1.53    0.41 
   6   0  13    0.66    0.33 
   6   0 -13    1.00    0.36 
   7   0 -13    3.26    0.59 
  -7   0  13    3.77    0.64 
   7   0  13    4.23    0.62 
  -7   0 -13    2.97    0.55 
   8   0 -13    0.66    0.41 
  -8   0 -13    2.02    0.52 
  -8   0  13    1.29    0.47 
   8   0  13    1.24    0.43 
   9   0  13    3.22    0.69 
   0  -1 -13   18.50    0.76 
   0   1  13   19.37    0.81 
   0  -1  13   18.71    0.74 
   0  -1  13   18.26    0.75 
   0   1  13   18.08    0.70 
   0  -1 -13   18.75    0.56 
   0  -1  13   19.95    0.69 
   0   1 -13   18.22    0.68 
   1  -1  13   78.40    2.03 
  -1   1  13   82.64    2.08 
  -1  -1 -13   80.55    2.03 
  -1   1  13   86.71    1.90 
  -1  -1 -13   82.55    1.64 
   1  -1  13   82.61    1.87 
  -1  -1  13   81.05    1.93 
   1  -1 -13   79.03    2.03 
   1   1  13   81.47    1.99 
   1  -1 -13   82.15    1.84 
  -1  -1  13   77.68    1.95 
   1   1  13   80.24    2.06 
  -1  -1  13   79.96    1.95 
  -1   1 -13   82.98    2.06 
  -1   1 -13   81.16    1.85 
  -1  -1  13   79.51    1.97 
   2  -1  13   16.96    0.77 
  -2   1  13   17.18    0.77 
  -2  -1 -13   16.94    0.75 
  -2   1  13   16.58    0.78 
  -2   1  13   18.24    0.59 
   2  -1  13   18.36    0.63 
  -2  -1  13   18.11    0.72 
  -2   1 -13   17.37    0.64 
   2   1  13   15.92    0.79 
  -2   1 -13   17.33    0.80 
  -2  -1  13   18.08    0.77 
   2  -1 -13   17.56    0.71 
  -2  -1  13   18.30    0.75 
  -2  -1  13   17.72    0.69 
   3  -1  13   13.45    0.56 
  -3  -1 -13   13.64    0.72 
  -3   1  13   13.77    0.71 
   3   1 -13   14.69    0.73 
  -3  -1 -13   14.35    0.75 
  -3   1  13   13.45    0.76 
   3   1 -13   13.47    0.60 
   3  -1  13   14.57    0.75 
   3   1  13   14.09    0.75 
  -3   1 -13   14.07    0.77 
  -3  -1  13   13.46    0.61 
  -3   1 -13   13.85    0.60 
  -3  -1  13   13.66    0.74 
   3  -1 -13   13.84    0.70 
  -4   1  13    5.89    0.57 
   4  -1  13    7.38    0.45 
   4   1 -13    5.92    0.44 
   4  -1  13    5.85    0.55 
  -4  -1 -13    5.71    0.54 
  -4   1  13    7.02    0.53 
   4   1 -13    6.81    0.56 
  -4  -1 -13    5.31    0.51 
  -4  -1  13    7.07    0.47 
   4   1  13    6.69    0.59 
   4  -1 -13    7.35    0.60 
  -4  -1  13    6.63    0.60 
  -4   1 -13    6.93    0.61 
   5  -1  13   20.49    1.00 
  -5   1  13   21.11    0.94 
  -5  -1 -13   19.95    0.98 
  -5  -1 -13   21.31    0.99 
   5   1 -13   19.08    0.99 
  -5   1  13   19.45    1.03 
  -5  -1  13   18.88    1.00 
   5   1  13   20.61    1.02 
  -5   1 -13   18.83    1.01 
   5  -1 -13   19.70    1.02 
   6   1 -13   12.47    0.87 
   6  -1  13   12.34    0.83 
  -6  -1 -13   13.79    0.85 
  -6   1  13   11.25    0.85 
  -6   1  13   13.67    0.79 
  -6  -1 -13   12.14    0.81 
  -6  -1  13   11.03    0.84 
   6   1  13   11.37    0.84 
   6  -1 -13   12.49    0.87 
  -6   1 -13   14.26    0.92 
  -7  -1 -13    6.30    0.69 
   7  -1  13    5.49    0.66 
  -7   1  13    5.61    0.75 
  -7  -1 -13    7.12    0.69 
   7   1 -13    4.74    0.65 
  -7  -1  13    5.34    0.71 
  -7   1 -13    5.41    0.71 
   7  -1 -13    5.22    0.70 
   7   1  13    4.85    0.66 
   8  -1  13    5.35    0.73 
   8   1 -13    6.56    0.84 
  -8   1  13    4.47    0.72 
  -8  -1  13    4.65    0.72 
   8   1  13    4.46    0.67 
  -8   1 -13    4.22    0.68 
   8  -1 -13    5.68    0.78 
  -9   1  13    6.62    1.47 
  -9   1 -13    6.83    0.91 
   9   1  13    7.50    0.93 
   0  -2  13    6.62    0.48 
   0   2  13    6.14    0.47 
   0  -2 -13    6.22    0.49 
   0  -2  13    7.16    0.45 
   0   2  13    6.67    0.42 
   0  -2 -13    6.60    0.32 
   0   2 -13    5.97    0.44 
   0  -2  13    6.41    0.38 
   1   2 -13   52.43    1.42 
   1  -2  13   53.23    1.41 
  -1   2  13   54.64    1.33 
   1  -2  13   51.66    1.52 
  -1   2  13   51.35    1.56 
  -1  -2 -13   53.55    1.55 
  -1  -2  13   52.09    1.39 
  -1   2 -13   50.96    1.49 
   1   2  13   54.36    1.56 
  -1  -2  13   50.03    1.44 
   1   2  13   51.52    1.46 
   1  -2 -13   52.77    1.54 
  -1  -2  13   52.07    1.48 
  -1   2 -13   54.33    1.25 
   1  -2 -13   51.11    1.30 
  -2   2  13   68.40    1.90 
   2  -2  13   68.47    1.71 
  -2   2  13   70.43    1.53 
   2   2 -13   65.79    1.77 
  -2  -2 -13   66.63    1.87 
   2  -2  13   68.29    1.87 
   2  -2 -13   67.33    1.72 
   2  -2 -13   69.99    1.91 
  -2   2 -13   67.00    1.88 
  -2  -2  13   69.82    1.80 
   2   2  13   67.00    1.84 
   2   2  13   67.06    1.87 
  -2  -2  13   66.95    1.82 
  -2  -2  13   69.31    1.69 
   3  -2  13   32.12    1.18 
  -3   2  13   30.63    1.16 
  -3   2  13   31.49    1.20 
   3  -2  13   31.52    1.02 
  -3  -2 -13   32.15    1.19 
   3   2 -13   31.84    1.08 
  -3  -2  13   31.33    1.15 
  -3   2 -13   30.12    1.19 
  -3  -2  13   32.92    0.96 
  -3  -2  13   29.83    1.14 
   3  -2 -13   31.58    1.11 
   3   2  13   31.98    1.19 
   3   2  13   31.88    1.16 
  -4  -2 -13   11.91    0.76 
  -4   2  13   11.51    0.77 
   4  -2  13   13.26    0.65 
  -4  -2 -13   10.94    0.70 
   4  -2  13   11.48    0.71 
  -4   2  13   11.36    0.72 
   4   2 -13   12.36    0.66 
   4   2 -13   12.35    0.75 
  -4  -2  13   11.61    0.74 
   4   2  13   11.51    0.76 
   4  -2 -13   12.24    0.73 
  -4   2 -13   11.41    0.77 
  -5  -2 -13   16.41    0.86 
  -5   2  13   15.61    0.93 
   5  -2  13   15.16    0.77 
  -5  -2 -13   16.25    0.92 
  -5   2  13   15.73    0.88 
   5   2 -13   14.77    0.88 
   5  -2  13   15.54    0.87 
  -5   2 -13   17.33    0.97 
   5   2  13   16.82    0.95 
  -5  -2  13   14.73    0.93 
   5  -2 -13   16.50    0.93 
  -6   2  13    2.45    0.48 
  -6   2  13    1.99    0.42 
  -6  -2 -13    1.95    0.44 
   6  -2  13    2.31    0.44 
   6   2 -13    1.67    0.42 
  -6  -2 -13    2.70    0.47 
  -6   2 -13    2.25    0.47 
   6   2  13    1.98    0.46 
   6  -2 -13    2.16    0.47 
  -6  -2  13    1.79    0.45 
  -7   2  13   24.20    1.21 
  -7   2  13   21.94    1.25 
  -7  -2 -13   25.54    1.28 
   7  -2  13   24.35    1.20 
   7   2 -13   23.26    1.25 
   7  -2 -13   25.07    1.31 
  -7   2 -13   22.76    1.27 
  -7  -2  13   22.00    1.26 
   7   2  13   22.72    1.25 
  -8  -2 -13    4.96    0.74 
   8  -2  13    5.72    0.75 
  -8   2  13    6.41    0.85 
   8   2 -13    6.85    0.81 
   8   2  13    4.84    0.75 
   8  -2 -13    3.55    0.65 
  -8   2 -13    5.46    0.77 
  -8  -2  13    4.05    0.69 
   9   2  13    6.24    0.96 
  -9   2 -13    7.84    1.01 
   0  -3  13    1.40    0.20 
   0   3  13    0.72    0.27 
   0  -3 -13    1.58    0.34 
   0   3  13    1.09    0.23 
   0  -3  13    0.99    0.25 
   0  -3  13    1.03    0.26 
   0   3 -13    1.01    0.25 
   1   3 -13   13.14    0.69 
   1  -3  13   12.63    0.70 
  -1  -3 -13   13.33    0.76 
  -1   3  13   12.65    0.71 
   1  -3  13   12.12    0.65 
  -1   3  13   12.50    0.54 
   1   3 -13   12.47    0.60 
  -1  -3  13   12.61    0.57 
  -1   3 -13   11.78    0.66 
  -1  -3  13   13.44    0.69 
   1  -3 -13   12.01    0.70 
   1   3  13   11.43    0.63 
   1   3  13   11.96    0.69 
   1  -3 -13   12.59    0.57 
  -2   3  13    2.86    0.42 
  -2  -3 -13    2.99    0.44 
   2  -3  13    3.18    0.43 
   2   3 -13    3.73    0.32 
   2   3 -13    3.52    0.42 
   2  -3  13    4.25    0.42 
  -2   3 -13    3.84    0.47 
   2  -3 -13    2.20    0.37 
  -2  -3  13    3.09    0.38 
   2   3  13    4.18    0.47 
   2   3  13    3.45    0.43 
  -2  -3  13    4.18    0.44 
   2  -3 -13    3.36    0.40 
   3  -3  13   10.52    0.68 
  -3   3  13   10.89    0.72 
  -3  -3 -13    9.19    0.72 
   3  -3  13    9.35    0.59 
   3   3 -13   10.78    0.65 
   3   3  13   10.19    0.65 
  -3  -3  13    9.88    0.67 
  -3  -3  13    9.21    0.63 
  -3   3 -13   10.50    0.74 
   3   3  13    9.98    0.68 
   3  -3 -13    9.46    0.63 
   3  -3 -13   10.45    0.71 
   4  -3  13    5.59    0.56 
   4  -3  13    4.87    0.50 
  -4  -3 -13    5.23    0.51 
   4   3 -13    5.66    0.54 
  -4   3  13    5.05    0.57 
  -4  -3 -13    5.48    0.61 
  -4   3  13    5.69    0.60 
   4  -3 -13    4.18    0.53 
   4   3  13    4.58    0.56 
  -4  -3  13    5.76    0.58 
  -4  -3  13    6.70    0.58 
  -4   3 -13    5.61    0.59 
   5   3 -13   15.27    0.85 
  -5  -3 -13   15.77    0.98 
  -5   3  13   16.65    0.95 
   5   3 -13   16.28    0.94 
   5  -3  13   15.92    0.90 
  -5  -3 -13   15.38    0.84 
   5  -3  13   16.20    0.84 
  -5   3  13   18.63    1.02 
  -5  -3  13   14.52    0.90 
  -5   3 -13   15.24    0.97 
   5  -3 -13   16.70    0.95 
   5   3  13   15.31    0.94 
   6  -3  13    2.70    0.48 
  -6   3  13    3.87    0.58 
   6  -3  13    2.55    0.45 
   6   3 -13    3.01    0.54 
  -6   3  13    3.03    0.54 
  -6  -3 -13    3.46    0.57 
   6  -3 -13    3.22    0.57 
  -6  -3  13    2.90    0.54 
   6   3  13    2.24    0.49 
  -6   3 -13    3.79    0.62 
   7  -3  13   12.79    0.91 
  -7  -3 -13   15.04    1.06 
   7   3 -13   14.50    1.03 
  -7   3  13   14.28    1.03 
  -7   3  13   13.74    0.98 
   7   3  13   14.50    1.02 
  -7   3 -13   14.68    1.06 
   7  -3 -13   13.28    1.01 
  -7  -3  13   13.68    1.01 
  -8   3  13    6.34    0.85 
   8   3 -13    4.22    0.73 
  -8  -3 -13    4.34    0.72 
  -8   3 -13    4.30    0.72 
  -8  -3  13    3.74    0.70 
   8  -3 -13    5.10    0.82 
   8   3  13    5.35    0.82 
   0  -4  13    1.78    0.35 
   0  -4 -13    1.32    0.33 
   0   4  13    1.76    0.30 
   0  -4  13    1.64    0.34 
   0   4 -13    1.34    0.31 
   0   4  13    1.75    0.37 
   0   4 -13    1.74    0.33 
   1  -4  13   60.14    1.76 
   1   4 -13   61.69    1.61 
  -1   4  13   61.66    1.53 
   1  -4  13   60.45    1.81 
  -1   4  13   63.54    1.88 
   1   4 -13   58.10    1.78 
  -1  -4 -13   60.93    1.88 
  -1  -4  13   59.76    1.79 
   1  -4 -13   61.60    1.86 
   1   4  13   58.32    1.79 
   1   4  13   62.08    1.74 
   1  -4 -13   61.29    1.57 
  -1   4 -13   59.50    1.75 
  -1  -4  13   64.33    1.58 
   2  -4  13    3.75    0.49 
   2   4 -13    4.18    0.52 
  -2   4  13    3.72    0.51 
   2  -4  13    3.83    0.46 
  -2  -4 -13    3.97    0.56 
   2   4  13    2.95    0.44 
   2  -4 -13    4.49    0.47 
  -2  -4  13    4.31    0.43 
  -2   4 -13    4.06    0.51 
  -2  -4  13    2.79    0.43 
   2  -4 -13    3.87    0.52 
   2   4  13    3.02    0.43 
  -3  -4 -13   19.75    1.04 
   3  -4  13   19.57    0.95 
  -3   4  13   19.56    1.02 
   3  -4  13   20.44    0.93 
   3   4 -13   21.27    0.97 
  -3  -4  13   20.50    1.00 
  -3   4 -13   20.34    1.00 
  -3  -4  13   20.21    0.92 
   3  -4 -13   19.13    0.98 
   3  -4 -13   19.44    0.92 
   3   4  13   19.94    0.92 
   3   4  13   18.49    0.97 
   4  -4  13   14.68    0.85 
   4  -4  13   14.62    0.81 
  -4   4  13   14.66    0.89 
   4   4 -13   13.68    0.82 
  -4  -4 -13   12.54    0.88 
   4   4  13   15.45    0.92 
   4   4  13   13.89    0.78 
  -4  -4  13   14.64    0.83 
  -4  -4  13   12.45    0.83 
  -4   4 -13   13.44    0.88 
   4  -4 -13   14.23    0.85 
   4  -4 -13   12.29    0.83 
  -5   4  13    0.57    0.33 
  -5  -4 -13    0.32    0.34 
   5  -4  13    0.78    0.33 
  -5  -4 -13    0.17    0.25 
   5   4 -13    0.44    0.30 
  -5   4  13    0.66    0.35 
   5  -4  13    0.28    0.25 
  -5  -4  13    0.19    0.26 
  -5   4 -13    0.27    0.34 
  -5  -4  13    0.09    0.26 
   5  -4 -13    0.81    0.37 
   5   4  13   -0.06    0.30 
   6   4 -13    4.13    0.59 
  -6   4  13    5.02    0.67 
   6  -4  13    2.79    0.51 
   6  -4  13    3.97    0.58 
  -6  -4 -13    4.28    0.68 
  -6   4  13    3.80    0.62 
   6   4 -13    4.84    0.66 
   6   4  13    4.46    0.65 
  -6   4 -13    3.09    0.59 
  -6  -4  13    4.57    0.66 
   6  -4 -13    3.62    0.63 
  -7   4  13    2.24    0.55 
  -7  -4 -13    1.53    0.53 
   7  -4  13    1.31    0.44 
   7  -4  13    1.77    0.49 
   7   4 -13    2.25    0.55 
  -7   4  13    0.78    0.42 
  -7  -4  13    1.40    0.47 
   7   4  13    1.61    0.54 
   7  -4 -13    2.57    0.57 
  -7   4 -13    1.59    0.53 
  -8   4  13    3.17    0.68 
  -8   4  13    6.03    0.84 
  -8  -4 -13    4.57    0.81 
   8   4 -13    5.32    0.80 
  -8  -4  13    4.57    0.79 
   8  -4 -13    4.25    0.77 
  -8   4 -13    4.94    0.81 
   8   4  13    2.77    0.67 
   0   5  13    7.90    0.57 
   0   5  13    8.73    0.68 
   0  -5  13    7.21    0.62 
   0   5 -13    9.35    0.68 
   0   5 -13    8.61    0.60 
   0  -5 -13    8.04    0.70 
   1  -5  13   18.09    0.92 
   1   5 -13   18.74    0.96 
  -1  -5 -13   17.56    0.99 
  -1   5  13   17.61    0.95 
   1  -5  13   20.21    0.98 
  -1   5 -13   19.00    0.91 
  -1  -5  13   18.48    0.93 
   1   5  13   17.43    0.91 
   1   5  13   17.35    0.86 
   1  -5 -13   16.94    0.95 
  -1   5 -13   17.50    0.92 
   2  -5  13    1.42    0.36 
  -2  -5 -13    1.66    0.42 
   2   5 -13    1.40    0.38 
   2  -5  13    1.23    0.35 
  -2   5  13    0.68    0.32 
  -2   5 -13    0.88    0.35 
   2  -5 -13    0.79    0.33 
   2   5  13    1.10    0.35 
  -2  -5  13    1.02    0.33 
   2  -5 -13    1.75    0.36 
   2   5  13    1.05    0.34 
   3  -5  13    3.99    0.54 
   3  -5  13    5.60    0.58 
  -3  -5 -13    5.78    0.68 
  -3   5  13    4.69    0.63 
   3   5 -13    5.68    0.60 
   3   5  13    5.88    0.62 
  -3  -5  13    6.58    0.63 
   3   5  13    6.23    0.56 
  -3   5 -13    4.84    0.62 
   3  -5 -13    6.34    0.60 
   3  -5 -13    5.48    0.64 
  -3  -5  13    5.90    0.54 
   4  -5  13    3.86    0.54 
  -4  -5 -13    3.22    0.57 
   4  -5  13    3.72    0.53 
   4   5 -13    5.29    0.61 
  -4   5  13    4.76    0.66 
  -4  -5  13    3.31    0.49 
   4   5  13    3.36    0.53 
  -4   5 -13    3.34    0.54 
  -4  -5  13    4.66    0.63 
   4  -5 -13    4.32    0.62 
   4  -5 -13    4.62    0.58 
   5   5 -13    5.57    0.65 
   5  -5  13    6.61    0.68 
  -5  -5 -13    6.09    0.80 
   5  -5  13    5.97    0.62 
  -5   5  13    4.90    0.69 
  -5  -5  13    5.61    0.63 
  -5  -5  13    6.36    0.69 
   5  -5 -13    5.84    0.69 
   5  -5 -13    5.12    0.68 
  -5   5 -13    6.40    0.79 
   5   5  13    6.22    0.72 
  -6  -5 -13    1.99    0.54 
   6  -5  13    1.68    0.45 
   6   5 -13    1.69    0.45 
   6  -5  13    2.02    0.45 
  -6   5  13    1.74    0.52 
   6   5 -13    1.77    0.49 
  -6   5 -13    1.66    0.53 
  -6  -5  13    2.35    0.54 
   6   5  13    1.06    0.43 
   6  -5 -13    1.65    0.47 
  -6  -5  13    1.69    0.48 
   6  -5 -13    2.02    0.49 
  -7   5  13    9.18    0.92 
  -7  -5 -13    8.39    0.95 
   7  -5  13    8.15    0.83 
  -7   5  13    7.73    0.86 
   7   5 -13    9.04    0.90 
   7   5  13    9.91    0.96 
  -7   5 -13    8.15    0.98 
   7  -5 -13    7.35    0.86 
  -7  -5  13    8.75    0.90 
   7  -5 -13    8.35    0.83 
  -8   5  13    5.03    1.07 
   0   6 -13    0.65    0.33 
   0  -6  13    0.74    0.31 
   0   6  13    0.57    0.32 
   0  -6 -13    0.60    0.37 
   1  -6  13   23.88    1.14 
  -1   6  13   23.53    1.15 
   1   6 -13   23.80    1.16 
  -1  -6 -13   22.70    1.18 
  -1   6 -13   22.32    1.10 
   1   6  13   20.72    0.99 
  -1   6 -13   20.57    1.01 
  -1  -6  13   22.27    1.10 
   1   6  13   23.40    1.08 
   1  -6 -13   21.75    1.11 
   2  -6  13   27.87    1.25 
  -2  -6 -13   29.09    1.35 
   2   6 -13   29.24    1.30 
  -2   6  13   26.14    1.27 
  -2   6 -13   28.55    1.26 
   2   6  13   29.69    1.23 
  -2  -6  13   27.61    1.27 
  -2   6 -13   28.23    1.25 
   2  -6 -13   30.25    1.32 
   2   6  13   27.92    1.23 
   3   6 -13   25.51    1.25 
   3  -6  13   25.23    1.21 
  -3   6  13   25.86    1.29 
  -3  -6 -13   27.17    1.34 
   3  -6  13   26.65    1.21 
  -3  -6  13   29.00    1.30 
   3   6  13   25.95    1.23 
   3  -6 -13   24.98    1.22 
   3  -6 -13   22.12    1.08 
  -3   6 -13   26.93    1.27 
  -4  -6 -13    0.39    0.41 
   4  -6  13    0.63    0.31 
   4  -6  13    0.89    0.37 
  -4   6  13    0.68    0.35 
   4   6 -13    0.59    0.34 
  -4  -6  13    0.61    0.35 
   4   6  13    0.77    0.38 
   4  -6 -13    0.40    0.33 
   4  -6 -13    0.59    0.33 
  -4   6 -13    0.37    0.37 
  -5   6  13   -0.31    0.31 
   5  -6  13   -0.01    0.30 
   5  -6  13    0.21    0.32 
  -5  -6 -13    0.35    0.41 
   5   6 -13    0.59    0.39 
   5   6  13    0.08    0.33 
   5  -6 -13    0.58    0.40 
  -5  -6  13   -0.10    0.28 
   5  -6 -13    0.22    0.29 
  -5  -6  13    0.42    0.31 
  -5   6 -13   -0.05    0.30 
   6  -6  13    2.55    0.55 
   6   6 -13    1.67    0.50 
  -6  -6 -13    1.76    0.56 
  -6   6  13    1.45    0.50 
   6  -6 -13    1.65    0.48 
  -6  -6  13    1.22    0.45 
  -6   6 -13    0.88    0.51 
  -6  -6  13    0.75    0.41 
   6   6  13    1.85    0.51 
   6  -6 -13    2.05    0.56 
   7  -6  13    1.04    0.49 
  -7   6  13    1.31    0.83 
   7   6 -13    1.67    0.58 
   7  -6 -13    1.98    0.61 
  -7  -6  13    1.88    0.58 
   0  -7 -13    4.85    0.67 
   0   7 -13    4.11    0.61 
   0  -7  13    5.61    0.72 
   0   7  13    5.36    0.63 
   1   7 -13    2.13    0.49 
   1  -7  13    3.05    0.57 
  -1   7  13    2.38    0.52 
  -1  -7 -13    2.60    0.56 
  -1  -7  13    3.25    0.57 
   1   7  13    1.82    0.45 
   1   7  13    2.32    0.47 
   1  -7 -13    2.97    0.53 
  -1   7 -13    2.63    0.50 
  -2  -7 -13    6.11    0.73 
  -2   7  13    5.77    0.66 
   2  -7  13    6.19    0.69 
   2   7 -13    6.50    0.73 
   2  -7 -13    7.57    0.76 
   2   7  13    5.30    0.67 
  -2   7 -13    6.87    0.69 
   2   7  13    5.39    0.76 
  -2  -7  13    6.83    0.72 
  -2   7 -13    5.59    0.69 
  -3   7  13    0.57    0.38 
   3  -7  13    0.24    0.31 
   3   7 -13    0.24    0.34 
  -3  -7 -13    0.95    0.43 
  -3  -7  13    0.06    0.26 
   3  -7 -13   -0.17    0.30 
   3   7  13    0.00    0.31 
  -3   7 -13    0.38    0.36 
  -3   7 -13    0.39    0.31 
   4  -7  13    5.26    0.72 
  -4  -7 -13    7.35    0.86 
   4   7 -13    7.25    0.80 
  -4   7  13    6.72    0.82 
   4  -7 -13    6.69    0.80 
   4   7  13    6.80    0.78 
  -4   7 -13    6.26    0.67 
   4  -7 -13    6.40    0.75 
  -4   7 -13    7.67    0.85 
  -4  -7  13    7.85    0.79 
  -5   7  13    2.27    0.59 
   5   7 -13    2.19    0.59 
  -5  -7 -13    1.59    0.57 
   5  -7  13    2.08    0.55 
  -5  -7  13    2.24    0.56 
   5  -7 -13    2.11    0.53 
  -5   7 -13    2.37    0.52 
  -5   7 -13    1.55    0.57 
   5  -7 -13    2.48    0.56 
   5   7  13    1.46    0.51 
   6  -7  13    3.70    0.70 
   6   7 -13    3.35    0.70 
   6  -7 -13    3.25    0.66 
   0   8 -13    2.90    0.57 
   0   8  13    4.39    0.65 
   0  -8  13    4.05    0.69 
   0  -8 -13    4.52    0.69 
  -1   8  13   44.60    1.83 
   1   8 -13   45.94    1.86 
  -1  -8 -13   45.50    1.87 
   1  -8  13   44.56    1.83 
  -1   8 -13   43.41    1.78 
   1   8  13   39.12    1.85 
   1  -8 -13   44.58    1.80 
  -1  -8  13   43.90    1.80 
  -2  -8 -13    0.98    0.47 
   2   8 -13    0.10    0.35 
   2  -8  13    0.53    0.38 
  -2   8  13    0.99    0.43 
   2   8  13    0.75    0.41 
   2  -8 -13    0.64    0.42 
  -2  -8  13    0.74    0.43 
  -2   8 -13    1.23    0.45 
   3  -8  13   11.35    0.97 
  -3  -8 -13   10.74    1.02 
   3   8 -13   12.07    1.00 
  -3   8  13   12.51    1.01 
   3   8  13    9.06    0.94 
  -3   8 -13    9.92    0.94 
   3  -8 -13   10.84    0.91 
  -3  -8  13   11.88    0.97 
  -3   8 -13   10.15    0.89 
   4  -8  13    4.63    0.72 
   4   8 -13    4.17    0.73 
  -4   8  13    5.24    0.79 
  -4  -8 -13    6.24    0.91 
  -4   8 -13    4.94    0.71 
   4   8  13    4.34    0.72 
  -4   8 -13    4.96    0.78 
  -4  -8  13    5.38    0.81 
   0  -9  13    3.46    0.70 
   0  -9 -13    5.35    0.79 
   0   9 -13    5.56    0.83 
  -1   9  13    5.62    0.80 
  -1  -9 -13    5.06    0.79 
   1   9 -13    5.91    0.86 
   1  -9  13    5.36    0.79 
  -1  -9  13    4.47    0.76 
  -1   9 -13    5.11    0.75 
   1  -9 -13    4.94    0.76 
  -2   9  13    8.14    0.94 
  -2  -9 -13    9.56    1.00 
  -2   9 -13    9.87    0.91 
  -3   9 -13    4.60    0.73 
   3   9  13    3.81    0.78 
   0   0  14   31.58    1.01 
   0   0  14   31.53    1.07 
   0   0 -14   28.75    0.98 
   0   0  14   31.20    0.87 
   1   0 -14   20.16    0.71 
   1   0  14   21.00    0.88 
  -1   0 -14   21.10    0.78 
  -1   0  14   18.64    0.79 
   1   0  14   20.18    0.61 
  -1   0  14   18.86    0.73 
   1   0  14   19.04    0.79 
  -1   0  14   21.01    0.83 
  -2   0  14    9.25    0.60 
  -2   0 -14    9.37    0.54 
   2   0  14    9.44    0.60 
  -2   0  14    9.75    0.57 
   2   0  14    9.15    0.37 
   2   0 -14    9.52    0.54 
  -2   0  14    9.85    0.48 
  -2   0 -14    9.38    0.61 
   3   0 -14    0.40    0.23 
   3   0  14    0.61    0.26 
  -3   0  14    0.56    0.22 
   3   0 -14    0.41    0.15 
  -3   0 -14    0.57    0.25 
  -3   0 -14    0.27    0.21 
  -3   0  14    0.60    0.26 
  -4   0  14   32.98    1.13 
  -4   0 -14   30.85    1.23 
  -4   0 -14   32.55    1.12 
   4   0  14   31.43    1.24 
   4   0 -14   32.43    1.22 
  -4   0  14   32.38    1.27 
  -5   0 -14    2.67    0.48 
  -5   0  14    2.01    0.40 
  -5   0 -14    2.50    0.41 
  -5   0  14    2.71    0.39 
   5   0 -14    2.30    0.43 
   5   0  14    2.77    0.46 
  -6   0 -14    6.01    0.66 
   6   0 -14    5.85    0.66 
  -6   0  14    6.32    0.68 
   6   0  14    7.56    0.69 
  -7   0  14    5.73    0.78 
  -7   0 -14    4.60    0.65 
   7   0  14    4.28    0.64 
   7   0 -14    5.34    0.73 
  -8   0  14    1.69    0.51 
   8   0 -14    1.35    0.50 
  -8   0 -14    2.18    0.52 
   8   0  14    1.15    0.43 
   9   0  14    0.07    0.38 
   0   1  14   16.42    0.67 
   0  -1 -14   18.04    0.76 
   0  -1  14   17.75    0.66 
   0   1 -14   16.40    0.67 
   0   1  14   17.48    0.79 
   0  -1  14   16.79    0.75 
   0  -1 -14   17.76    0.56 
   0  -1  14   16.34    0.72 
  -1   1  14   81.09    2.09 
  -1   1  14   82.50    1.89 
   1  -1  14   79.55    1.84 
   1  -1  14   79.26    2.04 
  -1  -1 -14   76.88    2.00 
   1  -1 -14   80.83    1.87 
  -1   1 -14   81.15    1.90 
  -1  -1  14   81.66    1.97 
  -1  -1  14   83.78    2.01 
  -1  -1  14   83.88    2.04 
   1   1  14   81.25    2.12 
  -1   1 -14   80.60    2.09 
   1   1  14   81.85    2.04 
  -1  -1  14   80.92    2.01 
   1  -1 -14   80.71    2.09 
  -2   1  14   18.30    0.62 
  -2   1  14   16.25    0.80 
  -2   1  14   17.98    0.81 
   2  -1  14   16.84    0.78 
  -2  -1 -14   16.35    0.77 
   2  -1  14   18.60    0.64 
  -2  -1  14   17.85    0.74 
  -2   1 -14   16.24    0.81 
  -2   1 -14   17.73    0.67 
   2   1  14   17.46    0.80 
  -2  -1  14   17.93    0.71 
   2   1  14   16.11    0.80 
  -2  -1  14   17.91    0.77 
  -2  -1  14   17.94    0.78 
   2  -1 -14   16.94    0.71 
   3   1 -14   54.39    1.60 
   3  -1  14   54.21    1.37 
  -3   1  14   52.68    1.59 
  -3  -1 -14   52.08    1.58 
   3  -1  14   52.80    1.63 
   3   1 -14   54.13    1.45 
  -3   1  14   52.65    1.66 
  -3  -1 -14   56.30    1.67 
  -3   1 -14   55.72    1.44 
   3  -1 -14   53.89    1.57 
   3   1  14   54.59    1.66 
  -3   1 -14   52.47    1.68 
  -3  -1  14   55.52    1.67 
  -3  -1  14   57.30    1.52 
  -4  -1 -14   -0.01    0.23 
   4   1 -14    0.14    0.23 
  -4   1  14   -0.15    0.21 
  -4   1  14    0.07    0.22 
   4  -1  14    0.10    0.23 
  -4  -1 -14   -0.11    0.23 
   4   1  14    0.07    0.22 
  -4   1 -14    0.16    0.23 
   4  -1 -14   -0.27    0.22 
  -4  -1  14   -0.01    0.21 
  -4  -1  14   -0.23    0.15 
   5  -1  14   18.52    0.98 
   5   1 -14   17.61    0.96 
  -5  -1 -14   17.15    0.91 
  -5   1  14   18.58    1.00 
  -5  -1 -14   18.18    0.96 
  -5   1  14   19.34    0.92 
  -5  -1  14   17.98    1.00 
  -5   1 -14   18.87    1.01 
   5  -1 -14   17.70    0.97 
   5   1  14   17.12    0.96 
  -6  -1 -14   30.02    1.26 
   6  -1  14   28.15    1.27 
   6   1 -14   27.27    1.26 
  -6   1  14   28.79    1.19 
  -6  -1 -14   28.18    1.26 
  -6   1  14   26.89    1.31 
   6   1  14   25.41    1.25 
  -6  -1  14   29.22    1.35 
   6  -1 -14   28.82    1.31 
  -6   1 -14   28.94    1.32 
  -7   1  14    1.20    0.42 
   7   1 -14    1.43    0.45 
  -7  -1 -14    1.80    0.46 
   7  -1  14    1.63    0.46 
  -7  -1  14    1.35    0.45 
   7  -1 -14    1.56    0.47 
   7   1  14    1.67    0.49 
  -7   1 -14    1.46    0.45 
  -8   1  14    4.68    0.73 
   8  -1  14    5.09    0.73 
   8   1 -14    3.48    0.67 
   8   1  14    3.84    0.69 
   8  -1 -14    3.41    0.64 
  -8   1 -14    4.02    0.67 
  -8  -1  14    4.11    0.71 
   9   1  14    4.91    0.79 
  -9   1 -14    4.91    0.80 
   0  -2 -14   11.56    0.66 
   0   2  14   11.87    0.68 
   0  -2  14   11.50    0.52 
   0  -2  14   11.34    0.58 
   0  -2  14   11.41    0.63 
   0   2 -14   12.23    0.62 
   0   2  14   12.19    0.58 
   0  -2 -14   12.01    0.45 
  -1   2  14    1.48    0.23 
  -1   2  14    1.13    0.30 
   1   2 -14    1.11    0.25 
  -1  -2 -14    1.08    0.30 
   1  -2  14    1.36    0.25 
   1  -2  14    1.84    0.34 
  -1   2 -14    1.35    0.21 
   1   2  14    1.00    0.27 
   1  -2 -14    1.76    0.26 
   1  -2 -14    1.11    0.27 
  -1  -2  14    1.36    0.25 
  -1  -2  14    1.22    0.27 
  -1  -2  14    1.18    0.27 
  -1   2 -14    0.93    0.27 
   1   2  14    1.43    0.29 
  -2   2  14   33.68    0.89 
   2   2 -14   31.42    1.09 
  -2   2  14   33.82    1.21 
  -2  -2 -14   31.64    1.17 
   2  -2  14   33.59    1.04 
   2  -2  14   31.84    1.17 
   2   2  14   33.63    1.20 
   2  -2 -14   31.01    1.18 
  -2   2 -14   31.47    1.18 
   2   2  14   34.38    1.19 
  -2  -2  14   32.72    1.10 
  -2  -2  14   32.18    1.13 
   2  -2 -14   31.31    1.03 
  -2  -2  14   32.46    1.03 
   3  -2  14   32.32    1.21 
  -3  -2 -14   31.78    1.20 
  -3   2  14   30.72    1.19 
   3  -2  14   32.00    1.04 
   3   2 -14   30.76    1.07 
  -3   2  14   31.54    1.23 
   3   2  14   32.06    1.18 
   3   2  14   29.57    1.18 
  -3   2 -14   30.70    1.22 
  -3  -2  14   33.42    1.00 
  -3  -2  14   32.12    1.19 
   3  -2 -14   31.22    1.12 
  -3  -2  14   33.13    1.19 
   4   2 -14    0.00    0.22 
  -4   2  14    0.27    0.27 
  -4  -2 -14    0.59    0.30 
   4  -2  14   -0.13    0.17 
   4   2 -14    0.37    0.22 
   4  -2  14    0.10    0.25 
  -4  -2 -14   -0.07    0.18 
  -4   2  14    0.04    0.23 
   4   2  14   -0.12    0.19 
  -4  -2  14    0.22    0.23 
   4  -2 -14   -0.06    0.23 
  -4   2 -14   -0.12    0.26 
  -5   2  14   63.14    1.93 
   5  -2  14   57.20    1.90 
  -5  -2 -14   62.42    1.92 
  -5   2  14   62.64    2.02 
   5  -2  14   62.95    1.95 
  -5  -2 -14   59.73    1.94 
   5   2 -14   61.37    1.96 
   5   2  14   60.05    1.97 
  -5   2 -14   62.35    2.01 
  -5  -2  14   59.67    1.97 
   5  -2 -14   60.13    1.92 
  -6  -2 -14    2.57    0.51 
  -6   2  14    2.53    0.47 
  -6   2  14    2.75    0.53 
  -6  -2 -14    1.69    0.42 
   6  -2  14    2.25    0.47 
   6   2 -14    2.13    0.47 
  -6  -2  14    2.09    0.48 
  -6   2 -14    2.38    0.53 
   6   2  14    2.53    0.51 
   6  -2 -14    2.76    0.52 
   7  -2  14   24.37    1.25 
  -7  -2 -14   24.15    1.29 
  -7   2  14   24.06    1.31 
   7   2 -14   25.79    1.32 
   7  -2 -14   27.08    1.40 
  -7   2 -14   23.56    1.31 
  -7  -2  14   24.26    1.32 
   7   2  14   25.93    1.35 
   8  -2  14    2.68    0.56 
  -8   2  14    2.83    0.59 
  -8  -2 -14    3.02    0.65 
   8   2 -14    3.10    0.63 
   8  -2 -14    3.50    0.67 
  -8   2 -14    3.32    0.66 
   8   2  14    3.56    0.68 
  -8  -2  14    4.64    0.74 
  -9   2 -14    0.67    0.51 
   0   3 -14   10.42    0.60 
   0  -3  14   10.44    0.65 
   0  -3  14   10.24    0.47 
   0   3  14   10.26    0.56 
   0  -3 -14   10.16    0.67 
   0  -3  14   10.25    0.60 
   0   3  14   10.50    0.68 
  -1   3  14   19.77    0.93 
   1  -3  14   20.20    0.91 
  -1   3  14   21.02    0.73 
   1   3 -14   20.55    0.80 
   1   3 -14   19.33    0.87 
  -1  -3 -14   20.36    0.94 
   1  -3  14   20.85    0.84 
   1   3  14   21.99    0.94 
   1  -3 -14   20.13    0.92 
  -1   3 -14   21.28    0.91 
  -1  -3  14   22.35    0.80 
  -1  -3  14   21.30    0.91 
   1   3  14   21.07    0.86 
   1  -3 -14   22.43    0.77 
   2  -3  14    4.44    0.49 
   2  -3  14    4.34    0.43 
   2   3 -14    5.47    0.40 
  -2   3  14    4.06    0.52 
  -2  -3 -14    4.76    0.54 
   2   3 -14    4.89    0.48 
   2  -3 -14    4.63    0.52 
  -2   3 -14    4.36    0.53 
  -2  -3  14    4.13    0.47 
   2   3  14    3.44    0.45 
   2   3  14    4.73    0.48 
   2  -3 -14    4.29    0.45 
  -2  -3  14    4.29    0.43 
   3  -3  14   19.71    0.93 
  -3  -3 -14   20.82    1.02 
  -3   3  14   19.35    0.98 
   3   3 -14   18.95    0.88 
   3  -3  14   21.12    0.88 
   3   3  14   17.60    0.89 
   3  -3 -14   18.78    0.96 
  -3  -3  14   18.51    0.88 
  -3  -3  14   17.84    0.89 
   3  -3 -14   20.12    0.89 
  -3   3 -14   20.37    0.98 
   3   3  14   20.17    0.96 
  -4  -3 -14    7.39    0.72 
  -4   3  14    7.93    0.67 
   4  -3  14    7.57    0.57 
  -4  -3 -14    7.75    0.61 
  -4   3  14    7.21    0.67 
   4   3 -14    7.32    0.58 
   4  -3  14    8.70    0.66 
  -4  -3  14    8.45    0.69 
  -4  -3  14    8.47    0.68 
   4  -3 -14    8.92    0.68 
  -4   3 -14    8.13    0.73 
   4   3  14    7.97    0.69 
   5   3 -14   12.12    0.76 
   5  -3  14   11.60    0.73 
   5   3 -14   12.41    0.84 
  -5  -3 -14   11.85    0.77 
  -5   3  14   12.78    0.88 
  -5  -3 -14   11.63    0.88 
   5  -3  14   12.35    0.81 
  -5   3  14   12.86    0.86 
   5   3  14   12.37    0.86 
   5  -3 -14   12.32    0.84 
  -5  -3  14   12.45    0.87 
  -5   3 -14   13.51    0.93 
  -6  -3 -14    6.60    0.74 
  -6  -3 -14    5.22    0.71 
  -6   3  14    5.69    0.70 
   6  -3  14    6.12    0.64 
   6   3 -14    5.21    0.68 
  -6   3  14    6.01    0.67 
   6   3  14    5.72    0.65 
   6  -3 -14    4.73    0.67 
  -6   3 -14    5.16    0.70 
  -6  -3  14    5.66    0.68 
   7   3 -14    0.17    0.35 
  -7  -3 -14   -0.02    0.36 
   7  -3  14   -0.11    0.27 
  -7   3  14   -0.42    0.27 
  -7   3  14    0.59    0.34 
   7  -3 -14    0.26    0.40 
  -7  -3  14    0.28    0.32 
   7   3  14    0.13    0.33 
  -7   3 -14    0.19    0.37 
  -8  -3 -14    3.31    0.65 
  -8   3  14    2.89    0.65 
   8   3 -14    3.08    0.63 
  -8  -3  14    2.09    0.58 
  -8   3 -14    1.99    0.57 
   8   3  14    2.40    0.59 
   8  -3 -14    3.76    0.73 
   0   4 -14   16.24    0.77 
   0  -4 -14   17.20    0.92 
   0   4  14   16.59    0.88 
   0   4  14   18.41    0.77 
   0  -4  14   16.99    0.87 
   0  -4  14   16.97    0.84 
   1  -4  14   11.03    0.71 
  -1  -4 -14   10.20    0.76 
   1   4 -14   11.54    0.60 
   1   4 -14   10.48    0.68 
  -1   4  14   11.31    0.75 
   1  -4  14   10.43    0.66 
   1   4  14   10.62    0.64 
   1  -4 -14    9.69    0.71 
   1   4  14   10.09    0.69 
  -1  -4  14   11.97    0.71 
  -1   4 -14   10.58    0.68 
  -2   4  14   11.83    0.78 
   2   4 -14   13.72    0.80 
   2  -4  14   12.59    0.77 
   2  -4  14   13.66    0.75 
  -2  -4 -14   13.60    0.86 
  -2  -4  14   13.57    0.79 
   2   4  14   11.98    0.75 
   2  -4 -14   12.17    0.69 
  -2  -4  14   13.76    0.69 
   2  -4 -14   11.02    0.75 
   2   4  14   12.65    0.76 
  -2   4 -14   12.36    0.78 
   3  -4  14    2.08    0.40 
   3  -4  14    3.00    0.45 
  -3  -4 -14    1.68    0.43 
  -3   4  14    2.50    0.47 
   3   4 -14    3.36    0.50 
   3  -4 -14    2.87    0.44 
  -3  -4  14    2.62    0.44 
  -3   4 -14    2.52    0.46 
  -3  -4  14    1.93    0.37 
   3   4  14    2.81    0.44 
   3  -4 -14    3.93    0.55 
   3   4  14    2.66    0.46 
  -4   4  14    3.61    0.54 
   4  -4  14    4.09    0.55 
  -4  -4 -14    2.60    0.52 
   4  -4  14    3.69    0.48 
   4   4 -14    3.25    0.49 
   4   4  14    3.41    0.48 
  -4  -4  14    2.88    0.50 
  -4  -4  14    3.83    0.52 
   4  -4 -14    3.78    0.54 
   4  -4 -14    3.37    0.52 
  -4   4 -14    3.49    0.54 
   4   4  14    4.22    0.61 
  -5   4  14    7.29    0.74 
   5   4 -14    7.94    0.68 
  -5   4  14    9.49    0.80 
   5  -4  14    8.90    0.72 
   5  -4  14    9.19    0.72 
  -5  -4 -14    8.89    0.84 
  -5  -4 -14    7.98    0.67 
   5  -4 -14    8.28    0.75 
  -5   4 -14    6.65    0.76 
  -5  -4  14    7.95    0.73 
   5   4  14    7.22    0.74 
  -5  -4  14    7.85    0.73 
  -6   4  14    1.15    0.40 
  -6  -4 -14    2.15    0.52 
   6  -4  14    2.34    0.48 
   6   4 -14    1.79    0.47 
   6  -4  14    2.09    0.47 
  -6   4  14    3.10    0.59 
   6   4  14    1.46    0.47 
  -6  -4  14    2.47    0.52 
  -6   4 -14    2.00    0.54 
   6  -4 -14    2.39    0.56 
  -7  -4 -14    7.10    0.86 
   7  -4  14    6.97    0.72 
   7   4 -14    4.42    0.69 
  -7   4  14    6.11    0.82 
  -7   4  14    6.13    0.80 
   7   4  14    5.33    0.78 
  -7  -4  14    5.77    0.79 
  -7   4 -14    5.68    0.79 
   7  -4 -14    5.76    0.82 
  -8   4  14    0.62    0.45 
  -8   4  14    0.46    0.48 
  -8  -4 -14    0.27    0.44 
   8  -4 -14    0.90    0.82 
  -8  -4  14    0.32    0.55 
   0   5  14   65.52    1.79 
   0   5  14   64.77    2.00 
   0  -5 -14   64.76    2.03 
   0   5 -14   62.52    1.81 
   0  -5  14   65.24    1.98 
   0   5 -14   62.54    1.97 
  -1   5  14   11.23    0.80 
   1  -5  14   11.15    0.75 
   1   5 -14   12.30    0.80 
   1  -5  14   12.57    0.80 
  -1  -5 -14   11.39    0.83 
  -1  -5  14   12.35    0.79 
   1   5  14   12.54    0.80 
   1   5  14   12.50    0.74 
   1  -5 -14   12.62    0.85 
  -1   5 -14   13.59    0.79 
  -2   5  14   34.04    1.41 
   2  -5  14   36.94    1.38 
  -2  -5 -14   35.21    1.46 
   2   5 -14   38.40    1.43 
   2  -5  14   35.24    1.39 
  -2  -5  14   34.78    1.38 
   2   5  14   37.65    1.37 
   2  -5 -14   35.11    1.41 
   2   5  14   35.74    1.36 
  -2   5 -14   34.60    1.37 
   3   5 -14   19.03    1.00 
   3  -5  14   18.90    1.00 
  -3   5  14   20.89    1.11 
  -3  -5 -14   18.17    1.09 
   3  -5  14   19.86    1.00 
  -3  -5  14   19.97    1.06 
   3  -5 -14   21.24    1.09 
  -3   5 -14   19.83    1.04 
   3   5  14   18.21    1.01 
  -3  -5  14   22.07    0.98 
   3   5  14   19.58    0.97 
   3  -5 -14   20.91    0.98 
  -4   5  14    1.79    0.44 
  -4  -5 -14    2.75    0.54 
   4  -5  14    1.93    0.42 
   4  -5  14    3.09    0.51 
   4   5 -14    2.76    0.49 
   4  -5 -14    1.69    0.41 
  -4   5 -14    1.76    0.48 
  -4  -5  14    1.84    0.41 
  -4  -5  14    1.68    0.44 
   4   5  14    1.53    0.41 
   4  -5 -14    1.60    0.41 
   5   5 -14    3.88    0.61 
  -5   5  14    4.07    0.62 
   5  -5  14    4.99    0.60 
  -5  -5 -14    4.56    0.74 
   5  -5  14    3.83    0.58 
  -5  -5  14    5.32    0.72 
   5  -5 -14    4.41    0.64 
   5  -5 -14    5.31    0.68 
  -5  -5  14    5.33    0.65 
   5   5  14    5.48    0.72 
  -5   5 -14    3.83    0.67 
   6   5 -14    1.02    0.41 
  -6   5  14    0.71    0.42 
   6  -5  14    0.87    0.37 
   6  -5  14    0.83    0.35 
  -6  -5 -14    0.27    0.43 
   6   5 -14    0.96    0.42 
   6   5  14    1.07    0.43 
   6  -5 -14    0.82    0.37 
  -6  -5  14    0.67    0.39 
  -6  -5  14    0.47    0.35 
  -6   5 -14    0.05    0.39 
   6  -5 -14    1.16    0.44 
   7   5 -14    0.34    0.36 
   7  -5  14    0.02    0.35 
  -7   5  14    0.42    0.39 
  -7  -5 -14   -0.03    0.39 
   7  -5 -14    0.32    0.38 
  -7   5 -14    0.25    0.47 
  -7  -5  14    0.39    0.40 
   7  -5 -14   -0.17    0.36 
   7   5  14    0.17    0.36 
   0   6 -14   27.94    1.27 
   0  -6 -14   25.62    1.29 
   0   6  14   28.71    1.28 
   0  -6  14   27.38    1.24 
  -1  -6 -14    0.97    0.39 
   1   6 -14    0.08    0.29 
  -1   6  14    1.23    0.40 
   1  -6  14    0.77    0.34 
  -1  -6  14    1.19    0.39 
   1   6  14    0.98    0.33 
  -1   6 -14    0.37    0.30 
  -1   6 -14    0.85    0.33 
   1  -6 -14    1.05    0.41 
   1   6  14    0.29    0.28 
   2   6 -14   23.60    1.19 
  -2  -6 -14   22.65    1.23 
   2  -6  14   24.38    1.17 
  -2   6  14   23.70    1.22 
   2   6  14   23.87    1.15 
   2   6  14   24.56    1.13 
  -2  -6  14   23.86    1.19 
  -2   6 -14   22.96    1.15 
  -2   6 -14   24.56    1.19 
   2  -6 -14   22.87    1.18 
   3   6 -14   22.25    1.17 
   3  -6  14   22.23    1.13 
  -3   6  14   21.76    1.22 
   3  -6  14   21.27    1.14 
  -3  -6 -14   23.49    1.26 
   3   6  14   21.62    1.15 
  -3  -6  14   21.16    1.13 
   3  -6 -14   20.56    1.13 
   3   6  14   22.07    1.10 
  -3   6 -14   19.15    1.11 
   4  -6  14    1.79    0.45 
   4   6 -14    1.51    0.46 
  -4   6  14    1.74    0.51 
   4  -6  14    1.80    0.45 
  -4  -6 -14    1.78    0.50 
   4   6  14    1.43    0.44 
  -4   6 -14    1.94    0.49 
  -4  -6  14    2.48    0.51 
   4  -6 -14    2.13    0.49 
   4  -6 -14    2.60    0.47 
  -5  -6 -14   30.30    1.56 
   5  -6  14   28.25    1.33 
   5  -6  14   27.76    1.37 
  -5   6  14   28.54    1.48 
   5   6 -14   26.64    1.37 
  -5   6 -14   30.75    1.54 
   5  -6 -14   25.21    1.33 
   5   6  14   28.45    1.45 
  -5  -6  14   28.44    1.41 
  -5  -6  14   27.43    1.36 
   5  -6 -14   28.56    1.35 
  -6  -6 -14    3.98    0.75 
   6   6 -14    6.22    0.82 
   6  -6  14    5.19    0.74 
  -6   6  14    6.11    0.85 
   6   6  14    3.97    0.74 
  -6  -6  14    6.28    0.83 
   6  -6 -14    4.99    0.76 
   6  -6 -14    5.80    0.77 
  -6   6 -14    6.08    0.87 
  -6  -6  14    4.95    0.72 
   7  -6  14   17.08    1.18 
   7  -6 -14   17.62    1.22 
  -7  -6  14   16.34    1.21 
   0  -7 -14    0.00    0.33 
   0   7  14    0.63    0.32 
   0   7 -14    0.00    0.26 
   0  -7  14    0.14    0.26 
   1  -7  14   25.21    1.26 
   1   7 -14   21.31    1.19 
  -1   7  14   25.50    1.29 
  -1  -7 -14   23.28    1.28 
  -1   7 -14   23.79    1.25 
   1   7  14   24.70    1.21 
   1  -7 -14   25.92    1.31 
  -1  -7  14   23.17    1.23 
   1   7  14   24.96    1.70 
  -2  -7 -14    6.35    0.83 
   2  -7  14    4.82    0.67 
  -2   7  14    5.37    0.73 
   2   7 -14    5.63    0.75 
  -2   7 -14    4.71    0.64 
  -2   7 -14    5.59    0.72 
  -2  -7  14    4.83    0.69 
   2  -7 -14    6.02    0.77 
   2   7  14    5.14    0.64 
   2   7  14    5.58    0.68 
   3   7 -14    5.09    0.70 
  -3  -7 -14    5.73    0.80 
  -3   7  14    6.04    0.81 
   3  -7  14    5.32    0.72 
  -3  -7  14    4.67    0.70 
   3   7  14    4.96    0.69 
   3  -7 -14    4.75    0.69 
  -3   7 -14    3.84    0.65 
  -3   7 -14    4.25    0.62 
  -4  -7 -14    1.76    0.55 
   4   7 -14    1.47    0.53 
   4  -7  14    1.87    0.47 
  -4   7  14    2.07    0.52 
  -4   7 -14    1.55    0.43 
   4  -7 -14    2.06    0.52 
  -4  -7  14    1.58    0.47 
   4   7  14    1.67    0.51 
  -4   7 -14    2.73    0.63 
   5  -7  14    0.12    0.35 
  -5  -7 -14   -0.09    0.43 
  -5   7  14    0.29    0.44 
   5  -7  14   -0.32    0.31 
   5   7 -14   -0.16    0.35 
  -5   7 -14    0.14    0.46 
   5   7  14    0.29    0.40 
   5  -7 -14    1.09    0.45 
   5  -7 -14   -0.35    0.37 
  -5  -7  14    1.29    0.45 
   6   7 -14    0.25    0.43 
   6  -7  14    0.32    0.42 
   6  -7 -14    0.94    0.49 
   0  -8 -14    6.88    0.82 
   0   8  14    6.58    0.76 
   0  -8  14    6.22    0.75 
   0   8 -14    8.42    0.83 
  -1   8  14    0.85    0.44 
  -1  -8 -14    1.02    0.46 
   1   8 -14    1.27    0.45 
   1  -8  14    2.13    0.54 
   1   8  14    1.42    0.43 
   1  -8 -14    1.65    0.51 
  -1   8 -14    1.37    0.45 
  -1  -8  14    1.85    0.53 
  -2   8  14    8.14    0.88 
  -2  -8 -14   12.24    1.04 
   2  -8  14    8.27    0.84 
   2   8 -14   10.55    0.95 
  -2  -8  14    9.07    0.87 
   2   8  14    9.10    0.86 
  -2   8 -14    8.55    0.83 
   2  -8 -14    8.89    0.86 
   3   8 -14    5.19    0.81 
  -3   8  14    3.57    0.70 
  -3  -8 -14    6.39    0.92 
   3  -8  14    6.51    0.78 
  -3   8 -14    5.46    0.75 
  -3   8 -14    5.11    0.79 
   3   8  14    5.13    0.76 
  -3  -8  14    7.06    0.80 
   3  -8 -14    5.66    0.77 
  -4   8  14    3.64    0.73 
   4   8 -14    4.06    0.73 
  -4  -8 -14    4.79    0.84 
   4  -8  14    2.80    0.61 
  -4   8 -14    4.08    0.74 
   4  -8 -14    4.36    0.80 
  -4   8 -14    3.53    0.61 
   4   8  14    4.46    0.72 
  -4  -8  14    4.22    0.75 
   0   9  14    2.38    0.62 
   0   9 -14    3.02    0.65 
   0  -9  14    2.57    0.70 
   0  -9 -14    2.16    0.61 
   1   9 -14    7.38    1.41 
  -1   9  14    8.01    0.91 
  -1  -9 -14    6.92    0.94 
  -1   9 -14    6.29    0.86 
   1  -9 -14    6.53    0.88 
  -2  -9 -14    4.09    0.76 
  -2   9  14    3.38    0.73 
   2  -9 -14    3.49    0.68 
  -2   9 -14    3.11    0.65 
   0   0  15    0.18    0.16 
   0   0 -15    0.39    0.19 
   0   0  15    0.33    0.20 
   0   0  15    0.26    0.14 
  -1   0  15   27.87    1.02 
   1   0 -15   26.84    0.87 
  -1   0  15   25.87    0.90 
   1   0  15   24.06    0.94 
  -1   0 -15   26.28    0.93 
   1   0  15   27.23    1.06 
   1   0  15   27.61    0.76 
   1   0 -15   28.42    1.01 
  -1   0  15   25.06    0.97 
   2   0  15    7.28    0.56 
  -2   0  15    7.46    0.55 
  -2   0 -15    7.35    0.57 
   2   0 -15    7.38    0.49 
  -2   0  15    7.19    0.53 
  -2   0  15    8.04    0.46 
  -2   0 -15    7.47    0.52 
   3   0 -15    2.62    0.35 
   3   0 -15    2.30    0.36 
  -3   0  15    2.99    0.40 
   3   0  15    3.29    0.46 
  -3   0  15    2.65    0.41 
  -3   0 -15    2.41    0.40 
  -3   0 -15    2.61    0.38 
   4   0  15    4.48    0.57 
  -4   0  15    4.88    0.56 
   4   0 -15    4.26    0.51 
  -4   0 -15    4.49    0.50 
  -4   0 -15    4.43    0.57 
  -4   0  15    5.05    0.45 
  -5   0 -15    2.58    0.48 
   5   0 -15    3.24    0.52 
   5   0  15    3.38    0.51 
  -5   0  15    3.25    0.42 
  -5   0  15    2.99    0.49 
   6   0  15   11.75    0.85 
  -6   0  15   12.27    0.89 
  -6   0 -15   10.91    0.83 
   6   0 -15   11.91    0.87 
  -7   0  15    4.24    0.69 
   7   0  15    5.12    0.69 
   7   0 -15    3.06    0.58 
  -7   0 -15    3.50    0.59 
  -8   0 -15    7.82    0.86 
   8   0  15    9.34    0.91 
   8   0 -15    7.11    0.85 
  -8   0  15    8.99    0.93 
   9   0  15   10.42    1.02 
   0  -1 -15    6.98    0.53 
   0  -1 -15    7.43    0.37 
   0  -1  15    7.81    0.53 
   0   1  15    7.13    0.48 
   0  -1  15    7.79    0.44 
   0   1 -15    7.59    0.46 
   0   1  15    7.73    0.56 
   0  -1  15    7.50    0.51 
   1  -1  15   45.37    1.18 
  -1  -1 -15   43.72    1.35 
  -1   1  15   41.44    1.37 
  -1   1  15   44.11    1.22 
   1  -1  15   43.57    1.36 
   1   1  15   43.15    1.41 
   1   1  15   45.59    1.34 
   1  -1 -15   42.10    1.36 
  -1  -1  15   43.86    1.29 
  -1   1 -15   43.00    1.20 
  -1  -1  15   43.37    1.29 
   1  -1 -15   43.19    1.17 
  -1   1 -15   41.69    1.36 
  -1  -1  15   45.13    1.27 
  -1  -1  15   42.75    1.31 
  -2   1  15    8.34    0.43 
   2  -1  15    8.84    0.45 
  -2   1  15    8.11    0.60 
   2  -1  15    7.83    0.58 
  -2  -1 -15    8.25    0.60 
  -2   1  15    7.59    0.57 
  -2   1 -15    8.44    0.59 
   2   1  15    8.58    0.59 
  -2   1 -15    9.22    0.50 
  -2  -1  15    8.77    0.53 
  -2  -1  15    9.11    0.52 
   2   1  15    8.57    0.61 
   2  -1 -15    8.49    0.52 
  -2  -1  15    8.84    0.55 
  -2  -1  15    8.28    0.58 
   3  -1  15   10.85    0.51 
  -3  -1 -15   10.30    0.69 
   3   1 -15    9.68    0.63 
  -3   1  15   11.04    0.67 
  -3  -1 -15    9.92    0.65 
  -3   1  15   10.86    0.71 
   3   1 -15   11.01    0.57 
   3  -1  15   11.24    0.69 
  -3   1 -15   10.84    0.72 
  -3  -1  15   11.21    0.61 
   3   1  15   10.08    0.68 
  -3   1 -15   10.99    0.67 
   3  -1 -15   11.25    0.66 
  -3  -1  15   11.05    0.69 
  -4  -1 -15   17.76    0.89 
  -4   1  15   17.98    0.96 
   4  -1  15   16.24    0.90 
   4   1 -15   17.34    0.89 
  -4   1  15   17.37    0.86 
  -4  -1 -15   17.36    0.89 
  -4   1 -15   15.82    0.91 
  -4  -1  15   17.82    0.93 
  -4  -1  15   17.38    0.76 
   4   1  15   16.54    0.90 
   4  -1 -15   15.93    0.86 
  -5   1  15    9.19    0.66 
  -5  -1 -15    8.86    0.72 
   5  -1  15    8.60    0.70 
  -5   1  15    9.43    0.75 
  -5  -1 -15   11.15    0.76 
   5   1 -15   10.28    0.75 
  -5   1 -15    8.00    0.69 
   5   1  15    9.31    0.73 
   5  -1 -15    9.90    0.75 
  -5  -1  15   10.50    0.78 
  -6   1  15   10.44    0.85 
   6  -1  15    7.93    0.73 
   6   1 -15    9.26    0.77 
  -6  -1 -15    8.24    0.73 
  -6  -1 -15   10.33    0.78 
   6  -1 -15    9.77    0.81 
  -6   1 -15    9.63    0.82 
   6   1  15    9.74    0.81 
  -6  -1  15    9.17    0.81 
   7  -1  15    4.56    0.67 
  -7   1  15    4.84    0.72 
   7   1 -15    4.52    0.67 
  -7  -1 -15    4.85    0.66 
   7  -1 -15    4.93    0.70 
  -7   1 -15    5.81    0.76 
  -7  -1  15    4.94    0.71 
   7   1  15    6.26    0.73 
  -8   1  15    3.73    0.73 
   8   1 -15    4.34    0.70 
   8  -1  15    4.76    0.71 
  -8   1 -15    5.18    0.76 
  -8  -1  15    2.53    0.60 
   8  -1 -15    3.17    0.65 
   8   1  15    3.13    0.64 
   9  -1  15    3.68    0.69 
  -9   1 -15    1.93    0.60 
   0  -2 -15   18.92    0.87 
   0  -2  15   18.49    0.83 
   0   2  15   19.80    0.77 
   0   2  15   19.93    0.90 
   0   2 -15   19.29    0.83 
   0   2 -15   19.71    0.72 
   0  -2  15   18.82    0.77 
  -1   2  15    1.83    0.27 
   1  -2  15    1.79    0.34 
  -1   2  15    1.73    0.35 
   1  -2  15    1.70    0.27 
   1   2 -15    1.27    0.27 
  -1  -2 -15    1.60    0.34 
   1  -2 -15    1.78    0.26 
   1   2  15    1.64    0.34 
  -1   2 -15    2.17    0.26 
  -1  -2  15    1.37    0.27 
  -1  -2  15    1.73    0.32 
   1  -2 -15    1.67    0.35 
   1   2  15    1.74    0.32 
  -1   2 -15    1.43    0.31 
  -1  -2  15    1.41    0.27 
  -2  -2 -15   40.64    1.39 
   2  -2  15   42.11    1.40 
  -2   2  15   42.04    1.41 
   2  -2  15   43.27    1.24 
   2   2 -15   40.94    1.30 
  -2  -2  15   42.21    1.25 
   2   2  15   39.29    1.35 
  -2  -2  15   43.37    1.34 
  -2   2 -15   41.69    1.42 
   2  -2 -15   41.15    1.24 
  -2  -2  15   40.97    1.33 
   2  -2 -15   42.99    1.44 
   2   2  15   41.90    1.42 
  -3  -2 -15   47.87    1.56 
   3  -2  15   49.99    1.60 
   3   2 -15   46.33    1.44 
   3  -2  15   49.71    1.39 
  -3   2  15   47.08    1.58 
  -3   2  15   49.06    1.64 
  -3  -2  15   49.27    1.57 
  -3  -2  15   49.31    1.37 
   3   2  15   48.04    1.59 
   3   2  15   49.99    1.62 
  -3   2 -15   48.71    1.62 
  -3  -2  15   50.30    1.58 
   3  -2 -15   47.15    1.48 
  -4   2  15   68.34    2.00 
   4   2 -15   64.58    1.79 
   4   2 -15   64.86    1.97 
  -4   2  15   63.73    2.02 
   4  -2  15   67.50    1.76 
  -4  -2 -15   64.60    1.96 
  -4  -2 -15   61.31    1.93 
   4  -2  15   65.10    1.99 
  -4   2 -15   64.49    2.01 
   4   2  15   63.79    2.00 
   4  -2 -15   61.40    1.87 
  -4  -2  15   65.45    1.98 
  -5   2  15    1.20    0.36 
  -5  -2 -15    0.58    0.29 
   5  -2  15    1.78    0.41 
  -5   2  15    1.44    0.41 
   5   2 -15    1.12    0.34 
  -5  -2 -15    0.91    0.37 
   5  -2 -15    2.29    0.44 
  -5   2 -15    0.75    0.37 
  -5  -2  15    1.97    0.44 
   5   2  15    1.79    0.45 
  -6  -2 -15   37.13    1.50 
  -6   2  15   36.34    1.45 
  -6   2  15   36.17    1.57 
   6   2 -15   33.74    1.48 
   6  -2  15   33.98    1.44 
  -6  -2 -15   34.97    1.43 
   6  -2 -15   36.30    1.51 
   6   2  15   35.65    1.55 
  -6   2 -15   36.95    1.59 
  -6  -2  15   36.42    1.56 
  -7   2  15    0.10    0.35 
  -7  -2 -15    0.36    0.39 
   7  -2  15    0.53    0.37 
   7   2 -15    0.71    0.38 
  -7  -2  15    0.99    0.43 
   7   2  15    0.71    0.40 
  -7   2 -15    0.34    0.39 
   7  -2 -15    0.65    0.39 
  -8   2  15    0.57    0.45 
   8  -2  15    1.22    0.44 
   8   2 -15    0.96    0.48 
  -8   2 -15   -0.01    0.41 
   8  -2 -15    0.60    0.46 
  -8  -2  15    0.88    0.46 
   8   2  15    0.87    0.47 
   0  -3  15   91.48    2.30 
   0   3  15   90.60    2.42 
   0  -3  15   90.90    2.17 
   0  -3  15   91.53    2.38 
   0   3 -15   91.54    2.31 
   0  -3 -15   87.64    2.40 
   0   3  15   95.04    2.23 
  -1   3  15    1.63    0.26 
   1  -3  15    1.35    0.31 
  -1   3  15    1.53    0.35 
   1  -3  15    1.18    0.28 
  -1  -3 -15    0.88    0.32 
   1   3 -15    1.72    0.30 
   1   3  15    1.20    0.29 
  -1  -3  15    1.88    0.36 
  -1  -3  15    2.28    0.37 
   1  -3 -15    0.74    0.30 
  -1  -3  15    1.82    0.28 
  -1   3 -15    1.44    0.30 
   1   3  15    1.10    0.29 
   2   3 -15   41.68    1.22 
  -2  -3 -15   41.02    1.46 
   2  -3  15   42.54    1.33 
   2   3 -15   40.15    1.36 
   2  -3  15   40.49    1.41 
  -2   3  15   40.31    1.45 
  -2   3 -15   41.35    1.44 
   2   3  15   38.99    1.37 
  -2  -3  15   40.49    1.38 
   2   3  15   40.17    1.41 
  -2  -3  15   44.02    1.34 
   2  -3 -15   42.86    1.28 
   2  -3 -15   38.17    1.42 
  -3  -3 -15   29.24    1.24 
   3  -3  15   29.26    1.19 
   3  -3  15   29.78    1.09 
  -3   3  15   30.31    1.25 
   3   3 -15   28.68    1.13 
  -3  -3  15   30.93    1.17 
   3   3  15   28.56    1.19 
  -3   3 -15   29.64    1.22 
   3  -3 -15   29.20    1.23 
   3  -3 -15   28.78    1.11 
  -3  -3  15   28.62    1.18 
   3   3  15   29.64    1.19 
  -4   3  15   38.57    1.50 
   4  -3  15   34.54    1.39 
   4   3 -15   38.58    1.34 
  -4  -3 -15   39.66    1.42 
  -4  -3 -15   38.94    1.50 
  -4   3  15   38.03    1.47 
   4  -3  15   39.63    1.32 
  -4  -3  15   38.23    1.45 
   4   3  15   36.56    1.42 
   4  -3 -15   35.53    1.36 
  -4   3 -15   38.89    1.51 
  -4  -3  15   39.32    1.44 
   5   3 -15   10.44    0.73 
  -5   3  15   10.07    0.82 
   5  -3  15   11.54    0.73 
  -5   3  15   12.10    0.84 
  -5  -3 -15   14.23    0.94 
  -5  -3 -15   11.19    0.78 
   5  -3  15   12.52    0.84 
   5   3 -15   12.17    0.85 
  -5   3 -15   12.18    0.92 
   5   3  15    9.41    0.79 
   5  -3 -15   12.44    0.85 
  -5  -3  15   11.57    0.84 
  -6   3  15    4.89    0.69 
   6   3 -15    5.64    0.73 
   6  -3  15    4.27    0.61 
  -6  -3 -15    6.04    0.62 
  -6  -3 -15    6.66    0.79 
  -6   3  15    5.03    0.66 
  -6   3 -15    3.60    0.63 
  -6  -3  15    4.94    0.68 
   6   3  15    4.28    0.65 
   6  -3 -15    4.70    0.68 
  -7  -3 -15    3.16    0.64 
  -7   3  15    3.21    0.59 
   7  -3  15    3.68    0.60 
  -7   3  15    3.31    0.63 
   7   3 -15    2.61    0.56 
   7  -3 -15    4.19    0.70 
  -7   3 -15    3.45    0.67 
  -7  -3  15    2.41    0.57 
   7   3  15    2.90    0.57 
  -8  -3 -15    0.00    0.42 
  -8   3  15    0.70    0.47 
   8  -3  15   -0.10    0.64 
   8   3 -15   -0.20    0.35 
  -8   3 -15    0.62    0.47 
   8  -3 -15    1.47    0.57 
  -8  -3  15    0.29    0.39 
   8   3  15    0.82    0.49 
   0   4  15    2.27    0.34 
   0  -4  15    1.56    0.37 
   0  -4 -15    1.70    0.40 
   0   4 -15    2.25    0.36 
   0  -4  15    1.86    0.35 
   0   4  15    1.77    0.40 
   1  -4  15   23.19    1.05 
   1   4 -15   22.57    0.89 
   1  -4  15   22.44    0.98 
   1   4 -15   23.13    1.02 
  -1  -4 -15   23.26    1.11 
  -1   4  15   22.25    1.06 
   1   4  15   23.31    0.98 
   1  -4 -15   21.98    1.07 
   1   4  15   23.68    1.07 
  -1  -4  15   23.90    1.04 
  -1   4 -15   24.46    1.04 
  -2  -4 -15   21.39    1.09 
   2  -4  15   23.11    1.00 
  -2   4  15   21.26    1.07 
   2   4 -15   20.75    1.00 
   2  -4  15   21.96    1.03 
   2  -4 -15   20.18    1.04 
  -2  -4  15   21.83    0.90 
   2  -4 -15   20.76    1.23 
  -2   4 -15   20.99    1.02 
   2   4  15   23.11    1.03 
   2   4  15   21.65    0.99 
  -2  -4  15   23.19    1.05 
  -3  -4 -15    2.30    0.47 
  -3   4  15    2.74    0.49 
   3  -4  15    2.60    0.42 
   3   4 -15    2.62    0.43 
   3  -4  15    3.05    0.44 
   3  -4 -15    2.78    0.43 
   3   4  15    2.73    0.44 
   3  -4 -15    1.26    0.38 
   3   4  15    2.44    0.42 
  -3  -4  15    2.22    0.40 
  -3  -4  15    2.63    0.45 
  -3   4 -15    2.62    0.50 
   4   4 -15    3.69    0.52 
  -4  -4 -15    3.23    0.55 
  -4   4  15    4.11    0.59 
   4  -4  15    3.25    0.51 
   4  -4  15    2.70    0.45 
  -4   4 -15    3.14    0.54 
  -4  -4  15    3.04    0.51 
   4   4  15    2.46    0.49 
   4  -4 -15    2.77    0.48 
   4  -4 -15    2.88    0.49 
   4   4  15    3.41    0.50 
  -4  -4  15    3.45    0.51 
  -5  -4 -15    4.80    0.58 
   5  -4  15    4.46    0.61 
   5   4 -15    5.67    0.61 
   5  -4  15    2.99    0.49 
  -5   4  15    3.84    0.59 
  -5  -4 -15    4.68    0.72 
  -5  -4  15    5.11    0.67 
  -5  -4  15    4.05    0.60 
  -5   4 -15    3.82    0.65 
   5   4  15    4.54    0.64 
   5  -4 -15    4.29    0.61 
   5  -4 -15    5.80    0.70 
   6  -4  15    9.11    0.77 
  -6   4  15    8.45    0.83 
  -6   4  15    8.60    0.84 
   6  -4  15    7.95    0.75 
   6   4 -15    7.76    0.79 
  -6  -4 -15    7.64    0.88 
   6  -4 -15    7.61    0.80 
  -6  -4  15    7.07    0.77 
  -6   4 -15    8.50    0.91 
   6   4  15    8.53    0.83 
  -7   4  15    2.16    0.56 
  -7  -4 -15    3.63    0.68 
   7  -4  15    3.18    0.58 
  -7   4  15    3.64    0.69 
   7   4 -15    3.61    0.68 
  -7  -4  15    3.55    0.66 
   7  -4 -15    2.40    0.61 
   7   4  15    2.96    0.60 
  -7   4 -15    4.25    0.72 
  -8   4  15   22.01    1.38 
  -8   4  15   19.80    1.37 
  -8  -4 -15   20.59    1.55 
   0   5 -15   -0.01    0.21 
   0   5  15    0.05    0.22 
   0  -5 -15   -0.28    0.21 
   0   5 -15    0.32    0.24 
   0   5  15    0.41    0.23 
   0  -5  15   -0.15    0.20 
   1   5 -15    6.69    0.62 
   1  -5  15    7.12    0.61 
   1  -5  15    6.30    0.62 
  -1  -5 -15    7.68    0.72 
  -1   5  15    6.10    0.63 
  -1   5 -15    6.42    0.61 
   1   5  15    6.77    0.63 
   1  -5 -15    6.22    0.66 
  -1  -5  15    5.46    0.57 
   1   5  15    6.38    0.57 
   2   5 -15    9.98    0.75 
   2  -5  15    8.23    0.67 
   2  -5  15   10.54    0.76 
  -2  -5 -15   11.17    0.85 
  -2   5  15    8.84    0.75 
   2  -5 -15   11.76    0.84 
   2   5  15    9.08    0.71 
  -2   5 -15   10.58    0.77 
   2   5  15   11.03    0.75 
  -2  -5  15   11.78    0.81 
   3  -5  15    0.40    0.27 
   3  -5  15    0.41    0.30 
  -3  -5 -15    0.93    0.38 
  -3   5  15    0.40    0.30 
   3   5 -15    0.48    0.31 
   3   5  15    0.36    0.31 
   3  -5 -15    0.44    0.32 
   3  -5 -15    0.18    0.27 
  -3   5 -15    0.59    0.37 
   3   5  15    0.55    0.29 
  -3  -5  15    0.38    0.31 
   4  -5  15    1.30    0.38 
  -4   5  15    1.21    0.39 
   4   5 -15    1.48    0.40 
   4  -5  15    1.98    0.44 
  -4  -5 -15    1.45    0.47 
  -4  -5  15    1.43    0.37 
   4   5  15    1.17    0.37 
  -4  -5  15    1.49    0.41 
   4  -5 -15    2.00    0.48 
   4   5  15    2.21    0.46 
   4  -5 -15    1.24    0.38 
  -4   5 -15    1.10    0.44 
   5  -5  15   12.62    0.88 
   5   5 -15   11.77    0.90 
  -5   5  15   12.06    0.96 
   5  -5  15   11.64    0.85 
  -5  -5 -15   11.06    0.99 
  -5   5 -15   12.84    1.01 
   5  -5 -15   11.64    0.90 
  -5  -5  15   10.43    0.84 
   5  -5 -15   11.00    0.86 
   5   5  15   10.02    0.87 
  -5  -5  15   10.83    0.86 
   6  -5  15    3.21    0.56 
   6   5 -15    3.50    0.60 
  -6   5  15    1.89    0.52 
   6   5 -15    3.65    0.62 
  -6  -5 -15    2.91    0.68 
   6  -5  15    3.01    0.55 
  -6  -5  15    2.52    0.54 
   6  -5 -15    3.04    0.62 
  -6   5 -15    3.33    0.67 
   6   5  15    3.17    0.60 
   6  -5 -15    3.63    0.59 
   7   5 -15    1.69    0.55 
  -7   5  15    3.02    0.65 
  -7  -5 -15    3.70    0.73 
   7  -5 -15    2.86    0.63 
  -7  -5  15    2.98    0.66 
   7  -5 -15    2.76    0.61 
   7   5  15    2.84    0.66 
  -7   5 -15    3.10    0.68 
   0  -6 -15    3.75    0.59 
   0   6  15    3.11    0.50 
   0  -6  15    2.60    0.49 
   0   6 -15    3.49    0.54 
  -1   6  15    0.91    0.38 
   1  -6  15    0.53    0.30 
   1   6 -15    0.70    0.31 
  -1  -6 -15   -0.42    0.29 
   1   6  15   -0.03    0.24 
  -1   6 -15   -0.07    0.23 
  -1   6 -15   -0.09    0.26 
  -1  -6  15   -0.03    0.23 
   1   6  15   -0.11    0.22 
   1  -6 -15    0.08    0.30 
   2  -6  15    7.05    0.68 
  -2  -6 -15    7.35    0.78 
   2   6 -15    8.13    0.74 
  -2   6  15    6.11    0.72 
   2   6  15    8.75    0.73 
  -2   6 -15    7.55    0.74 
   2  -6 -15    8.20    0.77 
  -2   6 -15    7.11    0.69 
   2   6  15    7.75    0.68 
  -2  -6  15    7.43    0.71 
  -3   6  15    2.78    0.54 
   3  -6  15    2.20    0.48 
   3  -6  15    2.15    0.45 
   3   6 -15    3.39    0.56 
  -3  -6 -15    1.78    0.48 
  -3   6 -15    3.33    0.60 
  -3  -6  15    3.03    0.52 
   3   6  15    2.79    0.47 
   3   6  15    2.48    0.50 
   3  -6 -15    2.26    0.51 
  -4   6  15   35.45    1.63 
  -4  -6 -15   35.95    1.65
[truncated: 150,006 more chars]
